# Supplementary material for: Essential Role of the ESX-5 Secretion System in Outer Membrane Permeability of Pathogenic Mycobacteria
Source: PLoS Genet. 2015 May 4;11(5):e1005190. doi: 10.1371/journal.pgen.1005190 (PMC4418733; doi:10.1371/journal.pgen.1005190)
Supplement: S1 File — (XLS) [file pgen.1005190.s012.xls]

## Sheet: Sample Source Data & Gel Images
SOURCE SAMPLE DATA
Proteomics Sample Label (Gel Lane)	Collaborator's Sample Label	Source Of Material	Type Of Material Processed	Sample Processing	Additional Details	Analysis Label
A	WT	Mycobacterium marinum	Genapol extract of cell surface	1DGE and IGD	wt marinum; biol. replicate 1	(A) WT.Genapol.Repl1
B	WT	Mycobacterium marinum	Genapol extract of cell surface	1DGE and IGD	wt marinum; biol. replicate 2	(B) WT.Genapol.Repl2
C	WT::MspA	Mycobacterium marinum	Genapol extract of cell surface	1DGE and IGD	wt marinum expressing M. smegmatis MspA; biol. replicate 1	(C) WT+MspA.Genapol.Repl1
D	WT::Mspa	Mycobacterium marinum	Genapol extract of cell surface	1DGE and IGD	wt marinum expressing M. smegmatis MspA; biol. replicate 2	(D) WT+Mspa.Genapol.Repl2
E	ΔEsx5::MspA	Mycobacterium marinum	Genapol extract of cell surface	1DGE and IGD	Esx5-deleted marinum expressing M. smegmatis MspA; biol. replicate 1	(E) ΔEsx5+MspA.Genapol.Repl1
F	ΔEsx5::MspA	Mycobacterium marinum	Genapol extract of cell surface	1DGE and IGD	Esx5-deleted marinum expressing M. smegmatis MspA; biol. replicate 2	(F) ΔEsx5+MspA.Genapol.Repl2
G	ΔEsx5::Esx5tub	Mycobacterium marinum	Genapol extract of cell surface	1DGE and IGD	Esx5-deleted marinum expressing M. tuberculosis Esx5; biol. replicate 1	(G) ΔEsx5+Esx5tub.Genapol.Repl1
H	ΔEsx5::Esx5tub	Mycobacterium marinum	Genapol extract of cell surface	1DGE and IGD	Esx5-deleted marinum expressing M. tuberculosis Esx5; biol. replicate 2	(H) ΔEsx5+Esx5tub.Genapol.Repl2
I	WT	Mycobacterium marinum	Cell envelope fraction	1DGE and IGD	wt marinum; biol. replicate 1	(I) WT.Envelope.Repl1
J	WT	Mycobacterium marinum	Cell envelope fraction	1DGE and IGD	wt marinum; biol. replicate 2	(J) WT.Envelope.Repl2
K	WT::MspA	Mycobacterium marinum	Cell envelope fraction	1DGE and IGD	wt marinum expressing M. smegmatis MspA; biol. replicate 1	(K) WT+MspA.Envelope.Repl1
L	WT::MspA	Mycobacterium marinum	Cell envelope fraction	1DGE and IGD	wt marinum expressing M. smegmatis MspA; biol. replicate 2	(L) WT+MspA.Envelope.Repl2
M	ΔEsx5::MspA	Mycobacterium marinum	Cell envelope fraction	1DGE and IGD	Esx5-deleted marinum expressing M. smegmatis MspA; biol. replicate 1	(M) ΔEsx5+MspA.Envelope.Repl1
N	ΔEsx5::MspA	Mycobacterium marinum	Cell envelope fraction	1DGE and IGD	Esx5-deleted marinum expressing M. smegmatis MspA; biol. replicate 2	(N) ΔEsx5+MspA.Envelope.Repl2
O	ΔEsx5::Esx5tub	Mycobacterium marinum	Cell envelope fraction	1DGE and IGD	Esx5-deleted marinum expressing M. tuberculosis Esx5; biol. replicate 1	(O) ΔEsx5+Esx5tub.Envelope.Repl1
P	ΔEsx5::Esx5tub	Mycobacterium marinum	Cell envelope fraction	1DGE and IGD	Esx5-deleted marinum expressing M. tuberculosis Esx5; biol. replicate 2	(P) ΔEsx5+Esx5tub.Envelope.Repl2

## Sheet: Drop Downs
Version 29Jan2014
Type of sample	Gel Staining	Objective	Pre-MS Sample Processing	Processing Involves	Number Of Gel Lanes	Number Of Gel Slices	Organism	ComparisonType
1DGE Gel	Coomassie	Identification Of Complex Mixtures (MS and MS/MS)	By Collaborator	1DGE + IGD	1	1	Human	2-group comparison, beta-binomial statistics
1DGE Gel Slice	Silver	Identification Of Simple Mixtures (MS and MS/MS)	By Collaborator at OPL	1DGE(blob gel) + IGD	2	2	Mouse	2-group comparison, paired statistics
2DGE Gel Punch		Mass Determination (MS only)	By OPL	2DGE + IGD	3	3	Rat	3-group comparison, beta-binomial statistics
Biochemical Fraction		Profiling (MS only)	By OPL (Service)	Bead Clean-up	4	5		3-group comparison, paired statistics
Cell Lysate				FASP + ISD	5	10
Exosomes				IGD	6
FFPE Tissue				ISD	7
FFPE Tissue Lysate				ISD + pTyr IP	8
LC fraction				ISD + TiOx capture	9
Peptide Eluate				ISD + TiOx capture + pTyr IP	10
Plasma				LCM, FASP + ISD	11
Secretome				ZipTip Clean-up	12
Serum					13
Synthetic Peptide					14
Tissue Lysate					15

## Sheet: ESX-5 for CE proteins
Gene.name	MaxQuant.pgID	Protein.IDs.short	Fasta.headers.255	Peptides counts	Unique peptides counts	sequence coverage (%)	Mol.weight.kDa	norm average CE WT	norm average CE WT + MspA	norm avergae CE dESX5 + MspA	norm average compl dESX5 + MspA	MspA/WT CE	MspA/dESX5 CE	compl/ESX5 CE
MMAR_2680	3621	B2HSU9	>tr|B2HSU9|B2HSU9_MYCMM Conserved protein OS=Mycobacterium marinum (strain ATCC BAA-535 / M) GN=MMAR_2680 PE=4 SV=1	15	5	27.4	67.672	16.3825	19.5862	0	3.0961	1.19556	∞	∞
MMAR_3798	2563	B2HNF5	>tr|B2HNF5|B2HNF5_MYCMM Type I modular polyketide synthase OS=Mycobacterium marinum (strain ATCC BAA-535 / M) GN=MMAR_3798 PE=4 SV=1	24	11	7	582.14	16.3596	0.528385	0	0	0.0322982	∞	0
MMAR_3070	724	B2HFU1	>tr|B2HFU1|B2HFU1_MYCMM Conserved hypothetical alanine and proline rich protein OS=Mycobacterium marinum (strain ATCC BAA-535 / M) GN=MMAR_3070 PE=4 SV=1	12	12	29.1	53.097	8.44224	2.06665	0	1.04295	0.244798	∞	∞
MMAR_3088	741	B2HFV9	>tr|B2HFV9|B2HFV9_MYCMM Conserved protein OS=Mycobacterium marinum (strain ATCC BAA-535 / M) GN=MMAR_3088 PE=4 SV=1	9	9	18.6	46.059	5.96665	3.60491	0	1.04295	0.604176	∞	∞
MMAR_4030	3004	B2HQE5	>tr|B2HQE5|B2HQE5_MYCMM Acyl-CoA dehydrogenase OS=Mycobacterium marinum (strain ATCC BAA-535 / M) GN=MMAR_4030 PE=3 SV=1	8	8	25.7	43.766	5.95518	3.60491	0	0	0.605339	∞	0
pks10	3205	B2HR34	>tr|B2HR34|B2HR34_MYCMM Chalcone synthase, Pks10 OS=Mycobacterium marinum (strain ATCC BAA-535 / M) GN=pks10 PE=4 SV=1	4	3	17.8	37.025	5.95518	1.51481	0	0	0.254369	∞	0
MMAR_1411	690	B2HFM6	>tr|B2HFM6|B2HFM6_MYCMM Hypothetical membrane protein OS=Mycobacterium marinum (strain ATCC BAA-535 / M) GN=MMAR_1411 PE=4 SV=1	5	5	13.5	66.827	5.94372	4.13329	0	0.521474	0.695405	∞	∞
selD	1795	B2HK97	>tr|B2HK97|B2HK97_MYCMM Selenide, water dikinase OS=Mycobacterium marinum (strain ATCC BAA-535 / M) GN=selD PE=3 SV=1	6	6	21.6	34.565	5.94372	2.52469	0	2.06407	0.424766	∞	∞
MMAR_2497	3222	B2HR62	>tr|B2HR62|B2HR62_MYCMM Phosphatase OS=Mycobacterium marinum (strain ATCC BAA-535 / M) GN=MMAR_2497 PE=4 SV=1	7	7	30.1	35.094	5.93225	3.07652	0	0.510558	0.518609	∞	∞
murB	3134	B2HQU8	>sp|B2HQU8|MURB_MYCMM UDP-N-acetylenolpyruvoylglucosamine reductase OS=Mycobacterium marinum (strain ATCC BAA-535 / M) GN=murB PE=3 SV=1	10	10	28.7	38.193	5.93225	1.53826	0	2.07498	0.259305	∞	∞
mbtI	2268	B2HMA2	>tr|B2HMA2|B2HMA2_MYCMM Isochorismate synthase MbtI OS=Mycobacterium marinum (strain ATCC BAA-535 / M) GN=mbtI PE=4 SV=1	6	6	16.6	49.117	3.97012	4.10985	0	0	1.03519	∞	0
MMAR_2676	3617	B2HSU5	>tr|B2HSU5|B2HSU5_MYCMM Conserved protein OS=Mycobacterium marinum (strain ATCC BAA-535 / M) GN=MMAR_2676 PE=4 SV=1	14	3	41.7	32.352	21.3222	26.8898	0	9.78794	1.26112	∞	∞
MMAR_3797	2562	B2HNF4	>tr|B2HNF4|B2HNF4_MYCMM Type I modular polyketide synthase OS=Mycobacterium marinum (strain ATCC BAA-535 / M) GN=MMAR_3797 PE=4 SV=1	27	23	16.3	196.74	17.3865	13.4566	0	0	0.773972	∞	∞
MMAR_1442	701	B2HFQ1	>tr|B2HFQ1|B2HFQ1_MYCMM PE-PGRS family protein OS=Mycobacterium marinum (strain ATCC BAA-535 / M) GN=MMAR_1442 PE=4 SV=1	14	14	27.6	118.21	15.9149	13.985	0	0	0.878739	∞	∞
MMAR_3408	1469	B2HIS6	>tr|B2HIS6|B2HIS6_MYCMM Pyruvate-flavodoxin oxidoreductase OS=Mycobacterium marinum (strain ATCC BAA-535 / M) GN=MMAR_3408 PE=3 SV=1	30	30	27	128.82	14.8536	9.85174	0	4.12813	0.663258	∞	∞
fadD9	2495	B2HN69	>tr|B2HN69|B2HN69_MYCMM Fatty-acid-CoA ligase FadD9 OS=Mycobacterium marinum (strain ATCC BAA-535 / M) GN=fadD9 PE=4 SV=1	26	25	26.2	127.8	14.4089	9.85174	0	2.06407	0.683726	∞	∞
MMAR_3141	776	B2HG11	>tr|B2HG11|B2HG11_MYCMM Short-chain membrane-associated dehydrogenase OS=Mycobacterium marinum (strain ATCC BAA-535 / M) GN=MMAR_3141 PE=3 SV=1	14	14	49.7	30.498	12.3894	7.71475	0	10.2985	0.622688	∞	∞
ctpA_1	1863	B2HKJ5	>tr|B2HKJ5|B2HKJ5_MYCMM Cation transporter p-type ATPase CtpA_1 OS=Mycobacterium marinum (strain ATCC BAA-535 / M) GN=ctpA_1 PE=3 SV=1	14	14	23.4	81.551	11.4428	11.848	0	0.521474	1.03542	∞	∞
MMAR_1129	69	B2HD13	>tr|B2HD13|B2HD13_MYCMM PPE family protein OS=Mycobacterium marinum (strain ATCC BAA-535 / M) GN=MMAR_1129 PE=4 SV=1	3	3	5.4	55.795	10.8949	13.4801	0	0	1.23728	∞	∞
cobN	577	B2HF56	>tr|B2HF56|B2HF56_MYCMM Cobalamin biosynthesis protein, CobN OS=Mycobacterium marinum (strain ATCC BAA-535 / M) GN=cobN PE=4 SV=1	15	15	16.2	128.46	9.91384	8.26659	0	2.57462	0.833843	∞	∞
papA3	2949	B2HQ61	>tr|B2HQ61|B2HQ61_MYCMM Conserved polyketide synthase associated protein PapA3 OS=Mycobacterium marinum (strain ATCC BAA-535 / M) GN=papA3 PE=4 SV=1	12	12	28.3	56.119	7.44971	10.3567	0	0	1.39021	∞	∞
fbiC	3473	B2HSB0	>tr|B2HSB0|B2HSB0_MYCMM F420 biosynthesis protein FbiC OS=Mycobacterium marinum (strain ATCC BAA-535 / M) GN=fbiC PE=3 SV=1	15	15	19.5	92.108	6.95918	7.28015	0	0.510558	1.04612	∞	∞
miaB2	1961	B2HL08	>sp|B2HL08|MIAB2_MYCMM (Dimethylallyl)adenosine tRNA methylthiotransferase MiaB 2 OS=Mycobacterium marinum (strain ATCC BAA-535 / M) GN=miaB2 PE=3 SV=1	10	10	21.1	56.63	6.45718	5.64811	0	0.521474	0.874702	∞	∞
MMAR_2292	2788	B2HPD7	>tr|B2HPD7|B2HPD7_MYCMM Uncharacterized protein OS=Mycobacterium marinum (strain ATCC BAA-535 / M) GN=MMAR_2292 PE=4 SV=1	3	3	10	34.169	5.95518	5.11972	0	2.05315	0.859709	∞	∞
priA	2717	B2HP56	>tr|B2HP56|B2HP56_MYCMM Primosomal protein N PriA OS=Mycobacterium marinum (strain ATCC BAA-535 / M) GN=priA PE=4 SV=1	11	11	17.7	69.179	5.94372	4.63823	0	0.521474	0.780358	∞	∞
MMAR_3763	2312	B2HMF9	>tr|B2HMF9|B2HMF9_MYCMM PE-PGRS family protein OS=Mycobacterium marinum (strain ATCC BAA-535 / M) GN=MMAR_3763 PE=4 SV=1	8	8	11.6	145.86	3.97012	5.14317	0	0	1.29547	∞	∞
MMAR_2679	3620	B2HSU8	>tr|B2HSU8|B2HSU8_MYCMM Conserved membrane protein OS=Mycobacterium marinum (strain ATCC BAA-535 / M) GN=MMAR_2679 PE=4 SV=1	21	19	46.9	43.96	60.0194	70.7006	1.18377	1.02112	1.17796	59.725	0.862599
fadD26	1440	B2HIN2	>sp|B2HIN2|FAA26_MYCMM Long-chain-fatty-acid--AMP ligase FadD26 OS=Mycobacterium marinum (strain ATCC BAA-535 / M) GN=fadD26 PE=3 SV=1	14	14	25.3	62.952	21.3451	18.5764	0.53913	2.05315	0.870286	34.4562	3.80826
eccD5	3852	P9WNP9	>sp|P9WNP9|ECCD5_MYCTU ESX-5 secretion system protein eccD5 OS=Mycobacterium tuberculosis (strain ATCC 25618 / H37Rv) GN=eccD5 PE=1 SV=1	15	12	19.3	53.435	18.881	17.543	0.53913	56.1857	0.929137	32.5395	104.216
MMAR_2677	3618	B2HSU6	>tr|B2HSU6|B2HSU6_MYCMM Conserved membrane protein OS=Mycobacterium marinum (strain ATCC BAA-535 / M) GN=MMAR_2677 PE=4 SV=1	12	9	20.1	53.515	73.4702	77.0412	2.90667	0	1.0486	26.505	0
MMAR_1790	1635	B2HJK3	>tr|B2HJK3|B2HJK3_MYCMM Conserved hypothetical alanine and arginine rich protein OS=Mycobacterium marinum (strain ATCC BAA-535 / M) GN=MMAR_1790 PE=4 SV=1	15	15	29.1	62.982	15.3785	15.4998	0.591884	2.57462	1.00789	26.1873	4.34988
metE	3663	B2HT14	>tr|B2HT14|B2HT14_MYCMM 5-methyltetrahydropteroyltriglutamate--homocysteine methyltransferase OS=Mycobacterium marinum (strain ATCC BAA-535 / M) GN=metE PE=3 SV=1	23	23	24.2	82.11	20.3182	12.4702	0.591884	3.0961	0.613746	21.0687	5.23092
MMAR_2664	3613	B2HST3	>tr|B2HST3|B2HST3_MYCMM Conserved membrane protein OS=Mycobacterium marinum (strain ATCC BAA-535 / M) GN=MMAR_2664 PE=4 SV=1	23	14	38.7	54.102	58.5708	62.7279	3.28753	15.4696	1.07098	19.0805	4.70552
MMAR_3779	2326	B2HMH4	>tr|B2HMH4|B2HMH4_MYCMM Non-ribosomal peptide synthetase OS=Mycobacterium marinum (strain ATCC BAA-535 / M) GN=MMAR_3779 PE=4 SV=1	21	20	10.5	321.14	12.9029	8.72463	0.53913	0.521474	0.676176	16.1828	0.967251
MMAR_2665	3614	B2HST4	>tr|B2HST4|B2HST4_MYCMM Conserved FtsK/SpoIIIE family protein OS=Mycobacterium marinum (strain ATCC BAA-535 / M) GN=MMAR_2665 PE=4 SV=1	63	26	44.6	152.57	241.231	252.425	18.7936	137.673	1.0464	13.4314	7.3255
pcnA	2628	B2HNS2	>tr|B2HNS2|B2HNS2_MYCMM Poly(A) polymerase PcnA OS=Mycobacterium marinum (strain ATCC BAA-535 / M) GN=pcnA PE=4 SV=1	17	17	36.6	53.591	9.89091	6.75177	0.53913	5.182	0.682624	12.5235	9.61177
leuC	1394	B2HII1	>sp|B2HII1|LEUC_MYCMM 3-isopropylmalate dehydratase large subunit OS=Mycobacterium marinum (strain ATCC BAA-535 / M) GN=leuC PE=3 SV=1	17	17	40.6	50.384	12.4238	13.4566	1.07826	5.17108	1.08313	12.48	4.79576
murA	3047	B2HQJ8	>tr|B2HQJ8|B2HQJ8_MYCMM UDP-N-acetylglucosamine 1-carboxyvinyltransferase OS=Mycobacterium marinum (strain ATCC BAA-535 / M) GN=murA PE=3 SV=1	13	13	41.5	44.125	6.93625	6.65798	0.53913	3.11793	0.959882	12.3495	5.78326
phoH2	3693	B2HT58	>tr|B2HT58|B2HT58_MYCMM PhoH-like protein PhoH2 OS=Mycobacterium marinum (strain ATCC BAA-535 / M) GN=phoH2 PE=4 SV=1	8	8	19.9	46.872	9.42331	6.24683	0.53913	1.03203	0.662913	11.5869	1.91426
dnaB	1348	B2HIC1	>tr|B2HIC1|B2HIC1_MYCMM Replicative DNA helicase DnaB OS=Mycobacterium marinum (strain ATCC BAA-535 / M) GN=dnaB PE=4 SV=1	10	10	27.6	50.692	7.95171	6.22339	0.53913	2.06407	0.782647	11.5434	3.82851
sigB	2176	B2HLY9	>tr|B2HLY9|B2HLY9_MYCMM RNA polymerase sigma factor OS=Mycobacterium marinum (strain ATCC BAA-535 / M) GN=sigB PE=3 SV=1	20	18	44.4	37.416	21.8242	12.8345	1.18377	3.61757	0.588084	10.8421	3.05598
MMAR_2745	98	B2HD50	>tr|B2HD50|B2HD50_MYCMM Acyl-CoA transferase/dehydratase OS=Mycobacterium marinum (strain ATCC BAA-535 / M) GN=MMAR_2745 PE=4 SV=1	12	12	18.5	86.061	5.47612	5.71845	0.53913	5.16016	1.04425	10.6068	9.57128
leuS	1329	B2HIA2	>sp|B2HIA2|SYL_MYCMM Leucine--tRNA ligase OS=Mycobacterium marinum (strain ATCC BAA-535 / M) GN=leuS PE=3 SV=1	28	28	28.1	107.11	10.9178	11.39	1.07826	9.29921	1.04325	10.5633	8.62427
otsB1	2756	B2HPA2	>tr|B2HPA2|B2HPA2_MYCMM Trehalose-6-phosphate phosphatase OtsB1 OS=Mycobacterium marinum (strain ATCC BAA-535 / M) GN=otsB1 PE=4 SV=1	25	25	21.3	135.5	14.386	11.9418	1.13101	4.13905	0.830103	10.5585	3.65959
uvrB	3180	B2HR01	>tr|B2HR01|B2HR01_MYCMM UvrABC system protein B OS=Mycobacterium marinum (strain ATCC BAA-535 / M) GN=uvrB PE=3 SV=1	20	20	32.9	81.099	9.44624	10.9085	1.13101	6.70275	1.1548	9.64489	5.92632
MMAR_3406	1467	B2HIS4	>tr|B2HIS4|B2HIS4_MYCMM Uncharacterized protein OS=Mycobacterium marinum (strain ATCC BAA-535 / M) GN=MMAR_3406 PE=4 SV=1	12	11	30.9	49.593	10.4158	10.3098	1.13101	7.22423	0.989818	9.11552	6.38739
ctaD_1	1148	B2HHM4	>tr|B2HHM4|B2HHM4_MYCMM Cytochrome C oxidase polypeptide I CtaD_1 OS=Mycobacterium marinum (strain ATCC BAA-535 / M) GN=ctaD_1 PE=3 SV=1	9	7	12.3	64.11	15.367	19.6331	2.20927	12.9277	1.27761	8.88669	5.85156
mycP5	3619	B2HSU7	>tr|B2HSU7|B2HSU7_MYCMM Proline rich membrane-anchored mycosin MycP5 OS=Mycobacterium marinum (strain ATCC BAA-535 / M) GN=mycP5 PE=4 SV=1	20	16	36.2	59.837	61.5713	46.6528	5.32696	14.959	0.757703	8.75787	2.80817
murE	928	B2HGS1	>tr|B2HGS1|B2HGS1_MYCMM UDP-N-acetylmuramoyl-L-alanyl-D-glutamate--2,6-diaminopimelate ligase OS=Mycobacterium marinum (strain ATCC BAA-535 / M) GN=murE PE=3 SV=1	13	13	32.8	53.301	5.46465	4.68512	0.591884	3.10701	0.857351	7.91561	5.24936
MMAR_1462	708	B2HFS0	>tr|B2HFS0|B2HFS0_MYCMM Conserved hypothetical oxidoreductase OS=Mycobacterium marinum (strain ATCC BAA-535 / M) GN=MMAR_1462 PE=4 SV=1	6	6	19.7	40.28	6.97065	4.63823	0.591884	1.54259	0.665395	7.83638	2.60624
MMAR_0031	1313	B2HI76	>tr|B2HI76|B2HI76_MYCMM Uncharacterized protein OS=Mycobacterium marinum (strain ATCC BAA-535 / M) GN=MMAR_0031 PE=4 SV=1	10	10	42.8	26.119	6.46865	8.74808	1.13101	2.56371	1.35238	7.73472	2.26673
uvrD1	393	B2HED4	>tr|B2HED4|B2HED4_MYCMM ATP-dependent DNA helicase II UvrD1 OS=Mycobacterium marinum (strain ATCC BAA-535 / M) GN=uvrD1 PE=4 SV=1	21	21	28.1	84.87	14.8765	17.0381	2.20927	12.884	1.1453	7.71208	5.83179
polA	3176	B2HQZ6	>tr|B2HQZ6|B2HQZ6_MYCMM DNA polymerase OS=Mycobacterium marinum (strain ATCC BAA-535 / M) GN=polA PE=3 SV=1	26	26	28.1	98.163	20.3641	21.2417	2.80116	9.27738	1.0431	7.5832	3.31198
fabD	1176	B2HHR4	>tr|B2HHR4|B2HHR4_MYCMM Malonyl CoA-acyl carrier protein transacylase FabD OS=Mycobacterium marinum (strain ATCC BAA-535 / M) GN=fabD PE=4 SV=1	6	6	21.2	31.058	9.4577	8.24314	1.13101	3.08518	0.871579	7.28827	2.7278
MMAR_0944	3496	B2HSE3	>tr|B2HSE3|B2HSE3_MYCMM Uncharacterized protein OS=Mycobacterium marinum (strain ATCC BAA-535 / M) GN=MMAR_0944 PE=4 SV=1	13	13	42.3	29.557	24.2654	19.6331	2.80116	14.4157	0.8091	7.00894	5.14634
MMAR_4110	3236	B2HR86	>tr|B2HR86|B2HR86_MYCMM Aldehyde dehydrogenase OS=Mycobacterium marinum (strain ATCC BAA-535 / M) GN=MMAR_4110 PE=4 SV=1	22	22	32.3	95.016	12.4009	15.5233	2.26203	9.31013	1.25179	6.86255	4.11583
MMAR_5070	1528	B2HJ11	>tr|B2HJ11|B2HJ11_MYCMM Transcriptional regulatory protein (Purr family) OS=Mycobacterium marinum (strain ATCC BAA-535 / M) GN=MMAR_5070 PE=4 SV=1	15	15	30.6	38.549	14.4089	7.66786	1.18377	3.60666	0.532162	6.4775	3.04676
bioB	2975	B2HQ93	>sp|B2HQ93|BIOB_MYCMM Biotin synthase OS=Mycobacterium marinum (strain ATCC BAA-535 / M) GN=bioB PE=3 SV=1	9	9	27.8	37.598	11.4084	7.13948	1.13101	5.16016	0.62581	6.31245	4.56242
nadE	2310	B2HMF5	>tr|B2HMF5|B2HMF5_MYCMM Glutamine-dependent NAD(+) synthetase NadE OS=Mycobacterium marinum (strain ATCC BAA-535 / M) GN=nadE PE=4 SV=1	14	14	21.3	74.868	8.41931	6.70488	1.07826	2.57462	0.796369	6.21824	2.38776
moeY	1039	B2HH70	>tr|B2HH70|B2HH70_MYCMM Molybdopterin biosynthesis protein, MoeY OS=Mycobacterium marinum (strain ATCC BAA-535 / M) GN=moeY PE=4 SV=1	19	19	25	76.388	11.9218	16.5566	2.69565	9.80977	1.38876	6.14197	3.63911
MMAR_5214	1818	B2HKC2	>tr|B2HKC2|B2HKC2_MYCMM Uncharacterized protein OS=Mycobacterium marinum (strain ATCC BAA-535 / M) GN=MMAR_5214 PE=4 SV=1	8	8	18.9	48.281	5.96665	6.77522	1.13101	2.58554	1.13551	5.99039	2.28604
tex	3412	B2HS01	>tr|B2HS01|B2HS01_MYCMM Transcriptional accessory protein Tex OS=Mycobacterium marinum (strain ATCC BAA-535 / M) GN=tex PE=4 SV=1	39	39	42.2	84.619	46.1699	45.5366	7.65333	18.5766	0.986283	5.9499	2.42726
lysS	1555	B2HJ43	>tr|B2HJ43|B2HJ43_MYCMM Lysine--tRNA ligase OS=Mycobacterium marinum (strain ATCC BAA-535 / M) GN=lysS PE=3 SV=1	20	20	43.8	55.478	6.48011	6.70488	1.13101	4.62777	1.03469	5.9282	4.0917
ald	1929	B2HKV6	>tr|B2HKV6|B2HKV6_MYCMM Alanine dehydrogenase OS=Mycobacterium marinum (strain ATCC BAA-535 / M) GN=ald PE=3 SV=1	11	11	36.4	38.636	14.8765	13.2925	2.26203	1.53168	0.893525	5.87637	0.677125
MMAR_0068	1340	B2HIB3	>tr|B2HIB3|B2HIB3_MYCMM Uncharacterized protein OS=Mycobacterium marinum (strain ATCC BAA-535 / M) GN=MMAR_0068 PE=4 SV=1	8	8	52.8	15.986	5.44172	6.27028	1.13101	1.03203	1.15226	5.54394	0.912484
MMAR_1001	3546	B2HSK0	>tr|B2HSK0|B2HSK0_MYCMM Acyl-CoA dehydrogenase OS=Mycobacterium marinum (strain ATCC BAA-535 / M) GN=MMAR_1001 PE=3 SV=1	16	16	28.6	58.841	8.41931	9.22957	1.67014	4.12813	1.09624	5.52621	2.47172
dinG	3035	B2HQI4	>tr|B2HQI4|B2HQI4_MYCMM ATP-dependent helicase DinG OS=Mycobacterium marinum (strain ATCC BAA-535 / M) GN=dinG PE=4 SV=1	9	9	17.4	70.804	7.44971	6.19994	1.13101	2.06407	0.832239	5.48175	1.82497
mbtB	2254	B2HM85	>tr|B2HM85|B2HM85_MYCMM Phenyloxazoline synthase MbtB OS=Mycobacterium marinum (strain ATCC BAA-535 / M) GN=mbtB PE=4 SV=1	10	10	11.5	126.16	6.46865	5.71845	1.07826	3.10701	0.884025	5.3034	2.88151
proS	1901	B2HKR6	>tr|B2HKR6|B2HKR6_MYCMM Proline--tRNA ligase OS=Mycobacterium marinum (strain ATCC BAA-535 / M) GN=proS PE=3 SV=1	16	16	31.4	63.598	7.94025	8.77152	1.67014	4.13905	1.10469	5.25196	2.47826
MMAR_3410	1471	B2HIS8	>tr|B2HIS8|B2HIS8_MYCMM Phosphoenolpyruvate synthase OS=Mycobacterium marinum (strain ATCC BAA-535 / M) GN=MMAR_3410 PE=3 SV=1	27	27	37.2	87.841	9.93677	8.29003	1.67014	12.3626	0.834278	4.96366	7.40209
uvrD2	660	B2HFH8	>tr|B2HFH8|B2HFH8_MYCMM ATP-dependent DNA helicase II UvrD2 OS=Mycobacterium marinum (strain ATCC BAA-535 / M) GN=uvrD2 PE=4 SV=1	13	12	23	76.913	6.44572	8.26659	1.67014	3.08518	1.28249	4.94962	1.84725
pta	2889	B2HPZ2	>tr|B2HPZ2|B2HPZ2_MYCMM Phosphate acetyltransferase OS=Mycobacterium marinum (strain ATCC BAA-535 / M) GN=pta PE=3 SV=1	10	10	16	73.197	6.95918	5.21351	1.07826	4.63869	0.749156	4.83511	4.30201
ileS	2950	B2HQ62	>tr|B2HQ62|B2HQ62_MYCMM Isoleucine--tRNA ligase OS=Mycobacterium marinum (strain ATCC BAA-535 / M) GN=ileS PE=3 SV=1	22	22	24.4	119.31	8.44224	10.3801	2.15652	9.84252	1.22955	4.81337	4.56407
nucS	3041	B2HQJ2	>sp|B2HQJ2|NUCS_MYCMM Endonuclease NucS OS=Mycobacterium marinum (strain ATCC BAA-535 / M) GN=nucS PE=3 SV=1	9	9	34.1	24.809	7.92878	5.64811	1.18377	3.60666	0.712355	4.7713	3.04676
mmpL5_5	709	B2HFS1	>tr|B2HFS1|B2HFS1_MYCMM Conserved transmembrane transport protein, MmpL5_5 OS=Mycobacterium marinum (strain ATCC BAA-535 / M) GN=mmpL5_5 PE=4 SV=1	21	20	30.3	108.05	18.8695	18.5998	3.93217	13.927	0.985705	4.73016	3.5418
ino1	1337	B2HIB0	>tr|B2HIB0|B2HIB0_MYCMM Myo-inositol-1-phosphate synthase Ino1 OS=Mycobacterium marinum (strain ATCC BAA-535 / M) GN=ino1 PE=4 SV=1	19	19	48.4	40.337	32.742	31.9627	6.78608	14.9699	0.976197	4.71003	2.20597
cphB	2994	B2HQB2	>tr|B2HQB2|B2HQB2_MYCMM Cyanophycinase CphB OS=Mycobacterium marinum (strain ATCC BAA-535 / M) GN=cphB PE=4 SV=1	17	17	26.3	77.024	9.94824	12.9048	2.7484	4.12813	1.2972	4.69538	1.50201
MMAR_4459	174	B2HDI2	>tr|B2HDI2|B2HDI2_MYCMM Uncharacterized protein OS=Mycobacterium marinum (strain ATCC BAA-535 / M) GN=MMAR_4459 PE=4 SV=1	9	9	33.7	32.846	5.45319	2.52469	0.53913	1.03203	0.462975	4.6829	1.91426
MMAR_3304	1156	B2HHN2	>tr|B2HHN2|B2HHN2_MYCMM Uncharacterized protein OS=Mycobacterium marinum (strain ATCC BAA-535 / M) GN=MMAR_3304 PE=4 SV=1	10	10	26.2	40.605	6.43425	7.76165	1.67014	5.67072	1.2063	4.64729	3.39535
MMAR_0106	1595	B2HJA8	>tr|B2HJA8|B2HJA8_MYCMM Uncharacterized protein OS=Mycobacterium marinum (strain ATCC BAA-535 / M) GN=MMAR_0106 PE=4 SV=1	10	10	42	37.07	9.46917	12.8814	2.80116	7.21331	1.36035	4.59859	2.57512
fadE22	1089	B2HHE3	>tr|B2HHE3|B2HHE3_MYCMM Acyl-CoA dehydrogenase FadE22 OS=Mycobacterium marinum (strain ATCC BAA-535 / M) GN=fadE22 PE=3 SV=1	14	14	24	76.749	6.44572	5.19006	1.13101	2.57462	0.805196	4.58886	2.27639
MMAR_0438	2423	B2HMW6	>tr|B2HMW6|B2HMW6_MYCMM Zinc metalloprotease OS=Mycobacterium marinum (strain ATCC BAA-535 / M) GN=MMAR_0438 PE=4 SV=1	26	25	34.5	74.268	9.44624	12.353	2.69565	3.61757	1.30771	4.58256	1.342
MMAR_3631	2000	B2HL70	>tr|B2HL70|B2HL70_MYCMM Acyl-CoA dehydrogenase OS=Mycobacterium marinum (strain ATCC BAA-535 / M) GN=MMAR_3631 PE=4 SV=1	19	19	29.7	71.781	6.95918	5.11972	1.13101	5.65981	0.735679	4.52667	5.00419
mbtF	2255	B2HM86	>tr|B2HM86|B2HM86_MYCMM Non-ribosomal peptide synthetase MbtF OS=Mycobacterium marinum (strain ATCC BAA-535 / M) GN=mbtF PE=4 SV=1	30	30	23	164.4	20.9119	21.6529	4.95768	4.6496	1.03543	4.36755	0.937859
MMAR_3570	1763	B2HK44	>tr|B2HK44|B2HK44_MYCMM PE-PGRS family protein OS=Mycobacterium marinum (strain ATCC BAA-535 / M) GN=MMAR_3570 PE=4 SV=1	2	2	3.1	81.936	8.44224	7.20982	1.67014	2.06407	0.854017	4.31688	1.23586
csd	2768	B2HPB4	>tr|B2HPB4|B2HPB4_MYCMM Cysteine desulfurase OS=Mycobacterium marinum (strain ATCC BAA-535 / M) GN=csd PE=3 SV=1	16	16	40.5	44.884	8.45371	4.61478	1.07826	5.17108	0.545889	4.27984	4.79576
nadA	2980	B2HQ98	>tr|B2HQ98|B2HQ98_MYCMM Quinolinate synthetase NadA OS=Mycobacterium marinum (strain ATCC BAA-535 / M) GN=nadA PE=3 SV=1	12	12	38.4	37.647	12.4124	11.7543	2.80116	6.17036	0.94698	4.19621	2.20279
MMAR_3502	1715	B2HJX9	>tr|B2HJX9|B2HJX9_MYCMM Uncharacterized protein OS=Mycobacterium marinum (strain ATCC BAA-535 / M) GN=MMAR_3502 PE=4 SV=1	8	8	31.5	35.737	9.42331	7.18637	1.7229	7.22423	0.762616	4.17109	4.19307
MMAR_3960	2815	B2HPL6	>tr|B2HPL6|B2HPL6_MYCMM Uncharacterized protein OS=Mycobacterium marinum (strain ATCC BAA-535 / M) GN=MMAR_3960 PE=4 SV=1	4	4	8.1	62.891	6.95918	4.68512	1.13101	3.10701	0.673229	4.14241	2.7471
hemA	3311	B2HRJ1	>tr|B2HRJ1|B2HRJ1_MYCMM Glutamyl-tRNA reductase OS=Mycobacterium marinum (strain ATCC BAA-535 / M) GN=hemA PE=3 SV=1	11	11	26.6	49.196	7.43825	9.75795	2.36754	3.10701	1.31186	4.12156	1.31234
glyA1	3695	B2HT61	>tr|B2HT61|B2HT61_MYCMM Serine hydroxymethyltransferase OS=Mycobacterium marinum (strain ATCC BAA-535 / M) GN=glyA1 PE=3 SV=1	19	19	43.4	45.101	16.3366	18.5295	4.52406	9.27738	1.13423	4.09577	2.05068
MMAR_5142	1587	B2HJ83	>tr|B2HJ83|B2HJ83_MYCMM Conserved protein OS=Mycobacterium marinum (strain ATCC BAA-535 / M) GN=MMAR_5142 PE=4 SV=1	16	16	44.3	37.96	8.94424	4.56789	1.13101	9.8316	0.510708	4.03876	8.69273
MMAR_5236	1839	B2HKE4	>tr|B2HKE4|B2HKE4_MYCMM Cyclopropane-fatty-acyl-phospholipid synthase OS=Mycobacterium marinum (strain ATCC BAA-535 / M) GN=MMAR_5236 PE=4 SV=1	12	12	32.3	48.627	10.8834	13.4566	3.34029	9.85343	1.23643	4.02859	2.94987
mfd	180	B2HDI8	>tr|B2HDI8|B2HDI8_MYCMM Transcription-repair coupling factor Mfd (TrcF) OS=Mycobacterium marinum (strain ATCC BAA-535 / M) GN=mfd PE=4 SV=1	34	34	29.3	131.43	12.4353	14.9949	3.87942	14.4485	1.20583	3.86525	3.72439
MMAR_3268	1129	B2HHJ7;B2HHJ9;B2HRJ7	>tr|B2HHJ7|B2HHJ7_MYCMM Non-ribosomal peptide synthetase OS=Mycobacterium marinum (strain ATCC BAA-535 / M) GN=MMAR_3268 PE=4 SV=1	19	7	9.4	1070.2	17.3521	8.29003	2.15652	0.510558	0.477754	3.84417	0.236751
MMAR_4431	160	B2HDF4	>tr|B2HDF4|B2HDF4_MYCMM Uncharacterized protein OS=Mycobacterium marinum (strain ATCC BAA-535 / M) GN=MMAR_4431 PE=4 SV=1	8	8	25.3	33.791	6.44572	2.06665	0.53913	1.03203	0.320623	3.8333	1.91426
MMAR_0752	3085	B2HQP2	>tr|B2HQP2|B2HQP2_MYCMM Conserved ATPase OS=Mycobacterium marinum (strain ATCC BAA-535 / M) GN=MMAR_0752 PE=3 SV=1	16	15	25.8	75.091	5.96665	8.26659	2.15652	5.67072	1.38547	3.8333	2.62957
nrdE	1098	B2HHG0	>tr|B2HHG0|B2HHG0_MYCMM Ribonucleoside-diphosphate reductase OS=Mycobacterium marinum (strain ATCC BAA-535 / M) GN=nrdE PE=3 SV=1	34	34	51.6	82.06	49.6495	45.9712	12.0191	21.1949	0.925914	3.82483	1.76343
mbtE	2256	B2HM87	>tr|B2HM87|B2HM87_MYCMM Non-ribosomal peptide synthetase MbtE OS=Mycobacterium marinum (strain ATCC BAA-535 / M) GN=mbtE PE=4 SV=1	47	47	33.2	182.22	40.2262	39.2663	10.4017	25.8008	0.976138	3.77497	2.48043
dnaE1	2960	B2HQ75	>tr|B2HQ75|B2HQ75_MYCMM DNA polymerase III, alpha subunit, DnaE1 OS=Mycobacterium marinum (strain ATCC BAA-535 / M) GN=dnaE1 PE=4 SV=1	34	34	30.7	129.12	29.7874	30.4713	8.19246	12.9168	1.02296	3.71943	1.57667
MMAR_3975	2821	B2HPN1	>tr|B2HPN1|B2HPN1_MYCMM Transcriptional regulatory protein (FadR family) OS=Mycobacterium marinum (strain ATCC BAA-535 / M) GN=MMAR_3975 PE=4 SV=1	15	15	42.1	29.944	6.49158	8.31348	2.26203	2.57462	1.28066	3.67523	1.13819
tyrA	2063	B2HLG9	>tr|B2HLG9|B2HLG9_MYCMM Prephenate dehydrogenase TyrA OS=Mycobacterium marinum (strain ATCC BAA-535 / M) GN=tyrA PE=4 SV=1	11	11	35.4	32.957	6.45718	8.24314	2.26203	3.08518	1.27658	3.64414	1.3639
nirA_2	2271	B2HMA6	>tr|B2HMA6|B2HMA6_MYCMM Ferredoxin-dependent nitrite reductase, NirA_2 OS=Mycobacterium marinum (strain ATCC BAA-535 / M) GN=nirA_2 PE=4 SV=1	34	28	47.9	61.86	20.7973	18.6233	5.11594	10.8309	0.895466	3.64024	2.11709
MMAR_4234	3452	B2HS64	>tr|B2HS64|B2HS64_MYCMM Conserved hypothetical membrane protein OS=Mycobacterium marinum (strain ATCC BAA-535 / M) GN=MMAR_4234 PE=4 SV=1	17	17	23.8	75.453	12.4009	13.9616	3.93217	11.8847	1.12585	3.5506	3.02244
hemD	3313	B2HRJ3	>tr|B2HRJ3|B2HRJ3_MYCMM Uroporphyrin-III C-methyltransferase HemD OS=Mycobacterium marinum (strain ATCC BAA-535 / M) GN=hemD PE=4 SV=1	15	15	31.9	58.162	24.8362	17.543	5.01043	10.8418	0.70635	3.5013	2.16385
trpE	3157	B2HQX5	>tr|B2HQX5|B2HQX5_MYCMM Anthranilate synthase component I TrpE OS=Mycobacterium marinum (strain ATCC BAA-535 / M) GN=trpE PE=4 SV=1	12	12	25.6	55.375	7.47264	7.83199	2.26203	4.66052	1.04809	3.46237	2.06033
MMAR_4142	3259	B2HRB8	>tr|B2HRB8|B2HRB8_MYCMM Conserved hydrolase OS=Mycobacterium marinum (strain ATCC BAA-535 / M) GN=MMAR_4142 PE=4 SV=1	21	21	31.1	93.645	12.9144	13.9616	4.03768	7.21331	1.08109	3.45782	1.7865
cysN	3249	B2HRA8	>tr|B2HRA8|B2HRA8_MYCMM Bifunctional enzyme CysN/CysC: sulfate adenyltransferase (Subunit 1) + adenylylsulfate kinase OS=Mycobacterium marinum (strain ATCC BAA-535 / M) GN=cysN PE=3 SV=1	26	26	47.2	67.918	20.8317	25.3047	7.32521	12.3953	1.21472	3.45446	1.69214
MMAR_2991	549	B2HF11	>tr|B2HF11|B2HF11_MYCMM Molecular chaperone (Small heat shock protein) OS=Mycobacterium marinum (strain ATCC BAA-535 / M) GN=MMAR_2991 PE=3 SV=1	10	10	53	16.514	12.9144	11.8949	3.4458	2.57462	0.921063	3.45201	0.747178
pks5_1	2940	B2HQ50	>tr|B2HQ50|B2HQ50_MYCMM Polyketide synthase, Pks5_1 OS=Mycobacterium marinum (strain ATCC BAA-535 / M) GN=pks5_1 PE=4 SV=1	43	16	25.2	222.25	12.8914	9.27646	2.69565	6.70275	0.719583	3.44127	2.48651
MMAR_1183	248	B2HDS5	>tr|B2HDS5|B2HDS5_MYCMM Methyltransferase OS=Mycobacterium marinum (strain ATCC BAA-535 / M) GN=MMAR_1183 PE=4 SV=1	7	7	21.7	26.32	6.45718	7.76165	2.26203	1.54259	1.20202	3.43128	0.68195
ilvA	2965	B2HQ80	>tr|B2HQ80|B2HQ80_MYCMM Threonine dehydratase IlvA OS=Mycobacterium marinum (strain ATCC BAA-535 / M) GN=ilvA PE=4 SV=1	12	12	30.8	44.949	9.93677	13.4801	3.93217	4.13905	1.35659	3.42815	1.05261
ptpB	2149	B2HLU1	>tr|B2HLU1|B2HLU1_MYCMM Phosphotyrosine protein phosphatase PtpB OS=Mycobacterium marinum (strain ATCC BAA-535 / M) GN=ptpB PE=4 SV=1	13	13	46	30.164	7.44971	19.1751	5.60232	10.8418	2.57394	3.42271	1.93524
ribC	2725	B2HP66	>tr|B2HP66|B2HP66_MYCMM Riboflavin synthase alpha chain RibC OS=Mycobacterium marinum (strain ATCC BAA-535 / M) GN=ribC PE=4 SV=1	5	5	31.9	21.932	5.95518	7.7382	2.26203	6.70275	1.29941	3.42091	2.96316
fadD29	1422	B2HIL4	>sp|B2HIL4|FAA29_MYCMM Long-chain-fatty-acid--AMP ligase FadD29 OS=Mycobacterium marinum (strain ATCC BAA-535 / M) GN=fadD29 PE=3 SV=1	21	21	38.4	67.673	30.3352	32.5614	9.53449	18.5657	1.07339	3.41512	1.94721
MMAR_1883	1687	B2HJU6	>tr|B2HJU6|B2HJU6_MYCMM Magnesium chelatase OS=Mycobacterium marinum (strain ATCC BAA-535 / M) GN=MMAR_1883 PE=4 SV=1	11	11	20.9	65.59	8.43078	5.64811	1.67014	5.14925	0.669939	3.38181	3.08312
glmU	182	B2HDJ0	>sp|B2HDJ0|GLMU_MYCMM Bifunctional protein GlmU OS=Mycobacterium marinum (strain ATCC BAA-535 / M) GN=glmU PE=3 SV=1	12	12	31.5	51.146	11.4084	13.4566	3.98493	6.71367	1.17954	3.37689	1.68477
glmM	54	B2HCZ2	>sp|B2HCZ2|GLMM_MYCMM Phosphoglucosamine mutase OS=Mycobacterium marinum (strain ATCC BAA-535 / M) GN=glmM PE=3 SV=1	17	17	44	45.386	19.8506	16.9912	5.06319	12.895	0.855954	3.35583	2.54681
pks16	190	B2HDJ8	>tr|B2HDJ8|B2HDJ8_MYCMM Polyketide synthase Pks16 OS=Mycobacterium marinum (strain ATCC BAA-535 / M) GN=pks16 PE=4 SV=1	19	19	30.5	58.505	20.8661	16.9678	5.06319	9.33196	0.813175	3.3512	1.8431
MMAR_1369	663	B2HFI3	>tr|B2HFI3|B2HFI3_MYCMM Uncharacterized protein OS=Mycobacterium marinum (strain ATCC BAA-535 / M) GN=MMAR_1369 PE=4 SV=1	7	7	15.7	49.783	6.42279	5.74189	1.7229	3.59574	0.893988	3.33269	2.08703
desA1_1	2266	B2HMA0	>tr|B2HMA0|B2HMA0_MYCMM Acyl-[acyl-carrier protein] desaturase DesA1_1 OS=Mycobacterium marinum (strain ATCC BAA-535 / M) GN=desA1_1 PE=4 SV=1	21	20	48.2	39.183	41.2187	26.7023	8.02261	14.9918	0.64782	3.32838	1.86869
typA	3479	B2HSB7	>tr|B2HSB7|B2HSB7_MYCMM GTP-binding translation elongation factor TypA OS=Mycobacterium marinum (strain ATCC BAA-535 / M) GN=typA PE=4 SV=1	22	22	39.3	67.691	27.7679	29.5787	8.88985	14.4594	1.06521	3.32724	1.6265
MMAR_3534	1735	B2HK09	>sp|B2HK09|Y3534_MYCMM Putative S-adenosyl-L-methionine-dependent methyltransferase MMAR_3534 OS=Mycobacterium marinum (strain ATCC BAA-535 / M) GN=MMAR_3534 PE=3 SV=1	9	5	29.4	33.603	6.92478	3.55801	1.07826	1.54259	0.513809	3.29977	1.43063
pmmA	464	B2HEN6	>tr|B2HEN6|B2HEN6_MYCMM Phosphomannomutase PmmA OS=Mycobacterium marinum (strain ATCC BAA-535 / M) GN=pmmA PE=4 SV=1	10	10	24.5	48.916	7.46118	9.22957	2.80116	8.24535	1.23701	3.29491	2.94355
sulP	3364	B2HRQ8	>tr|B2HRQ8|B2HRQ8_MYCMM Transmembrane carbonic anhydrase, SulP OS=Mycobacterium marinum (strain ATCC BAA-535 / M) GN=sulP PE=4 SV=1	10	10	16.3	55.498	12.9258	12.9048	3.93217	2.06407	0.998374	3.28185	0.524917
ptrB	1028	B2HH57	>tr|B2HH57|B2HH57_MYCMM Protease II (Oligopeptidase B), PtrB OS=Mycobacterium marinum (strain ATCC BAA-535 / M) GN=ptrB PE=4 SV=1	24	24	29.9	79.155	9.92531	16.5801	5.06319	11.8629	1.67048	3.27463	2.34297
MMAR_3705	2267	B2HMA1	>tr|B2HMA1|B2HMA1_MYCMM Uncharacterized protein OS=Mycobacterium marinum (strain ATCC BAA-535 / M) GN=MMAR_3705 PE=4 SV=1	8	8	30	29.443	9.43477	9.32335	2.85391	6.17036	0.988191	3.26687	2.16207
MMAR_3476	1694	B2HJV3	>tr|B2HJV3|B2HJV3_MYCMM Uncharacterized protein OS=Mycobacterium marinum (strain ATCC BAA-535 / M) GN=MMAR_3476 PE=4 SV=1	10	10	20.3	52.541	5.95518	7.28015	2.26203	6.17036	1.22249	3.21842	2.7278
serB2	1107	B2HHH0	>tr|B2HHH0|B2HHH0_MYCMM Phosphoserine phosphatase SerB2 OS=Mycobacterium marinum (strain ATCC BAA-535 / M) GN=serB2 PE=4 SV=1	10	10	29.7	43.442	7.46118	7.25671	2.26203	5.68164	0.972596	3.20805	2.51174
metX	249	B2HDS6	>sp|B2HDS6|METX_MYCMM Homoserine O-acetyltransferase OS=Mycobacterium marinum (strain ATCC BAA-535 / M) GN=metX PE=3 SV=1	16	16	49.9	40.214	20.8546	12.8345	4.03768	6.70275	0.615426	3.17868	1.66005
hemL	3327	B2HRL5	>sp|B2HRL5|GSA_MYCMM Glutamate-1-semialdehyde 2,1-aminomutase OS=Mycobacterium marinum (strain ATCC BAA-535 / M) GN=hemL PE=3 SV=1	8	8	21	45.726	7.44971	7.18637	2.26203	4.11721	0.96465	3.17696	1.82014
aspC	2697	B2HP30	>tr|B2HP30|B2HP30_MYCMM Aspartate aminotransferase AspC OS=Mycobacterium marinum (strain ATCC BAA-535 / M) GN=aspC PE=4 SV=1	12	12	28.2	47.662	4.96265	10.8382	3.4458	22.1942	2.18395	3.14533	6.44094
valS	2321	B2HMG8	>tr|B2HMG8|B2HMG8_MYCMM Valine--tRNA ligase OS=Mycobacterium marinum (strain ATCC BAA-535 / M) GN=valS PE=3 SV=1	32	32	37.6	98.286	18.9154	25.7862	8.24521	20.6188	1.36324	3.12741	2.5007
gcvT	971	B2HGY0	>tr|B2HGY0|B2HGY0_MYCMM Aminomethyltransferase OS=Mycobacterium marinum (strain ATCC BAA-535 / M) GN=gcvT PE=3 SV=1	8	8	30	38.607	9.41184	8.72463	2.80116	4.62777	0.926984	3.11465	1.65209
purL	1014	B2HH37	>tr|B2HH37|B2HH37_MYCMM Phosphoribosylformylglycinamidine synthase 2 OS=Mycobacterium marinum (strain ATCC BAA-535 / M) GN=purL PE=3 SV=1	27	27	38.6	80.605	34.8074	40.2996	13.2029	26.8219	1.15779	3.05233	2.03152
MMAR_3795	2560	B2HNF2	>tr|B2HNF2|B2HNF2_MYCMM Adenylate cyclase OS=Mycobacterium marinum (strain ATCC BAA-535 / M) GN=MMAR_3795 PE=4 SV=1	12	4	26.8	59.019	5.94372	6.70488	2.20927	3.08518	1.12806	3.03488	1.39647
pks12	566	B2HF44	>tr|B2HF44|B2HF44_MYCMM Polyketide synthase, Pks12 OS=Mycobacterium marinum (strain ATCC BAA-535 / M) GN=pks12 PE=4 SV=1	73	64	21.3	434.28	101.215	90.4509	30.2324	49.5157	0.89365	2.99185	1.63783
MMAR_4353	3677	B2HT39	>tr|B2HT39|B2HT39_MYCMM GTP binding protein OS=Mycobacterium marinum (strain ATCC BAA-535 / M) GN=MMAR_4353 PE=4 SV=1	9	9	23	39.235	13.9184	11.8949	3.98493	8.25626	0.854622	2.98498	2.07187
MMAR_2279	2776	B2HPC4	>tr|B2HPC4|B2HPC4_MYCMM ATP-binding protein ABC transporter OS=Mycobacterium marinum (strain ATCC BAA-535 / M) GN=MMAR_2279 PE=3 SV=1	19	19	38.6	58.617	14.4089	26.7961	8.99536	27.3434	1.85969	2.97888	3.03972
rplP	3577	B2HSN8	>sp|B2HSN8|RL16_MYCMM 50S ribosomal protein L16 OS=Mycobacterium marinum (strain ATCC BAA-535 / M) GN=rplP PE=3 SV=1	8	8	48.6	15.706	26.3766	98.9143	33.2858	28.8751	3.75008	2.97167	0.86749
MMAR_5241	1844	B2HKE9	>tr|B2HKE9|B2HKE9_MYCMM Conserved transcriptional regulator OS=Mycobacterium marinum (strain ATCC BAA-535 / M) GN=MMAR_5241 PE=4 SV=1	20	20	43.9	46.716	11.9333	11.8246	4.03768	13.4055	0.990891	2.92856	3.3201
ilvD	2417	B2HMW0	>tr|B2HMW0|B2HMW0_MYCMM Dihydroxy-acid dehydratase OS=Mycobacterium marinum (strain ATCC BAA-535 / M) GN=ilvD PE=3 SV=1	24	24	49.8	58.601	20.3641	19.6097	6.73333	12.9168	0.962955	2.91233	1.91833
MMAR_3480	1698	B2HJV7	>tr|B2HJV7|B2HJV7_MYCMM Two-component transcriptional regulatory protein OS=Mycobacterium marinum (strain ATCC BAA-535 / M) GN=MMAR_3480 PE=4 SV=1	14	14	47	23.308	8.89838	9.82829	3.39304	9.78794	1.1045	2.8966	2.88471
MMAR_3132	769	B2HG02	>tr|B2HG02|B2HG02_MYCMM Acyl-CoA dehydrogenase OS=Mycobacterium marinum (strain ATCC BAA-535 / M) GN=MMAR_3132 PE=3 SV=1	9	9	25.7	42.095	11.4084	6.68143	2.31478	3.08518	0.58566	2.88642	1.33282
acs	1772	B2HK64	>tr|B2HK64|B2HK64_MYCMM Acetyl-coenzyme A synthetase OS=Mycobacterium marinum (strain ATCC BAA-535 / M) GN=acs PE=3 SV=1	19	19	35.8	71.278	17.877	21.6998	7.60057	27.8649	1.21384	2.85502	3.66615
MMAR_3068	722	B2HFT9	>tr|B2HFT9|B2HFT9_MYCMM Conserved protein OS=Mycobacterium marinum (strain ATCC BAA-535 / M) GN=MMAR_3068 PE=4 SV=1	27	27	25.8	124.98	19.383	19.0579	6.68058	12.3844	0.983225	2.85273	1.85379
MMAR_0232	1864	B2HKJ6	>tr|B2HKJ6|B2HKJ6_MYCMM Conserved hypothetical secreted protein OS=Mycobacterium marinum (strain ATCC BAA-535 / M) GN=MMAR_0232 PE=4 SV=1	5	5	24.7	31.163	5.93225	6.72832	2.36754	0.521474	1.13419	2.84191	0.22026
pknK_2	2143	B2HLT3	>tr|B2HLT3|B2HLT3_MYCMM Serine/threonine-protein kinase transcriptional regulatory protein PknK_2 OS=Mycobacterium marinum (strain ATCC BAA-535 / M) GN=pknK_2 PE=3 SV=1	19	18	23.5	107.61	6.97065	10.8382	3.82666	7.72387	1.55483	2.83228	2.01843
clpX	2570	B2HNG2	>sp|B2HNG2|CLPX_MYCMM ATP-dependent Clp protease ATP-binding subunit ClpX OS=Mycobacterium marinum (strain ATCC BAA-535 / M) GN=clpX PE=3 SV=1	25	25	50.7	46.816	45.1086	44.5267	15.7287	31.9603	0.987101	2.83092	2.03197
smc	1631	B2HJJ8	>tr|B2HJJ8|B2HJJ8_MYCMM Chromosome partition protein Smc OS=Mycobacterium marinum (strain ATCC BAA-535 / M) GN=smc PE=3 SV=1	45	45	36	130.63	35.275	31.5046	11.2046	25.8336	0.893116	2.81175	2.30561
glnE	1145	B2HHM1	>sp|B2HHM1|GLNE_MYCMM Glutamate-ammonia-ligase adenylyltransferase OS=Mycobacterium marinum (strain ATCC BAA-535 / M) GN=glnE PE=3 SV=1	26	26	28	108.54	18.8695	18.5764	6.62782	19.0762	0.984463	2.80279	2.8782
clpB	2841	B2HPS9	>tr|B2HPS9|B2HPS9_MYCMM Endopeptidase ATP binding protein (Chain B) ClpB OS=Mycobacterium marinum (strain ATCC BAA-535 / M) GN=clpB PE=3 SV=1	57	54	53.5	92.778	27.7909	34.0528	12.1774	35.0564	1.22532	2.79639	2.87881
pckG	2433	B2HMX9	>sp|B2HMX9|PCKG_MYCMM Phosphoenolpyruvate carboxykinase [GTP] OS=Mycobacterium marinum (strain ATCC BAA-535 / M) GN=pckG PE=3 SV=1	21	21	37.3	67.846	26.7754	32.538	11.691	21.7054	1.21522	2.78316	1.85659
folC	2320	B2HMG7	>tr|B2HMG7|B2HMG7_MYCMM Folylpolyglutamate synthase protein FolC OS=Mycobacterium marinum (strain ATCC BAA-535 / M) GN=folC PE=4 SV=1	13	13	24.4	50.589	12.4353	13.9381	5.01043	8.78865	1.12085	2.78182	1.75407
xseA	3681	B2HT43	>tr|B2HT43|B2HT43_MYCMM Exodeoxyribonuclease 7 large subunit OS=Mycobacterium marinum (strain ATCC BAA-535 / M) GN=xseA PE=3 SV=1	9	9	22.4	44.391	5.96665	4.63823	1.67014	4.12813	0.777359	2.77714	2.47172
MMAR_1514	865	B2HGH9;B2HIX8	>tr|B2HGH9|B2HGH9_MYCMM PPE family protein, PPE51_1 OS=Mycobacterium marinum (strain ATCC BAA-535 / M) GN=MMAR_1514 PE=4 SV=1	5	5	12.6	38.198	7.95171	4.61478	1.67014	2.58554	0.580351	2.76311	1.54809
MMAR_1681	1357	B2HID7	>tr|B2HID7|B2HID7_MYCMM Transferase OS=Mycobacterium marinum (strain ATCC BAA-535 / M) GN=MMAR_1681 PE=4 SV=1	8	8	22.9	44.503	8.92131	7.71475	2.80116	4.11721	0.864756	2.75413	1.46983
pheS	3193	B2HR20	>tr|B2HR20|B2HR20_MYCMM Phenylalanine--tRNA ligase alpha subunit OS=Mycobacterium marinum (strain ATCC BAA-535 / M) GN=pheS PE=3 SV=1	16	16	43.8	38.215	12.4124	13.9381	5.06319	9.26646	1.12292	2.75284	1.83016
MMAR_5314	2074	B2HLI6	>tr|B2HLI6|B2HLI6_MYCMM Hydrolase OS=Mycobacterium marinum (strain ATCC BAA-535 / M) GN=MMAR_5314 PE=4 SV=1	20	18	36.6	68.748	12.8914	23.2849	8.50898	12.895	1.80623	2.73651	1.51545
MMAR_0548	2665	B2HNX0	>tr|B2HNX0|B2HNX0_MYCMM Conserved protein OS=Mycobacterium marinum (strain ATCC BAA-535 / M) GN=MMAR_0548 PE=4 SV=1	10	10	40.6	32.032	5.47612	7.7382	2.85391	1.53168	1.41308	2.71144	0.536693
gatB	1373	B2HIF9	>tr|B2HIF9|B2HIF9_MYCMM Aspartyl/glutamyl-tRNA(Asn/Gln) amidotransferase subunit B OS=Mycobacterium marinum (strain ATCC BAA-535 / M) GN=gatB PE=3 SV=1	20	20	40.6	54.238	17.8999	15.4295	5.70782	8.77774	0.861986	2.70322	1.53784
prfB	877	B2HGJ2	>sp|B2HGJ2|RF2_MYCMM Peptide chain release factor 2 OS=Mycobacterium marinum (strain ATCC BAA-535 / M) GN=prfB PE=3 SV=1	12	12	27	41.525	7.46118	10.9085	4.03768	5.70347	1.46204	2.70168	1.41256
alr	61	B2HD03	>tr|B2HD03|B2HD03_MYCMM Alanine racemase OS=Mycobacterium marinum (strain ATCC BAA-535 / M) GN=alr PE=3 SV=1	12	12	25	41.044	6.44572	4.63823	1.7229	2.57462	0.719583	2.69211	1.49436
tig	2574	B2HNG6	>sp|B2HNG6|TIG_MYCMM Trigger factor OS=Mycobacterium marinum (strain ATCC BAA-535 / M) GN=tig PE=3 SV=1	16	16	30	52.363	9.92531	15.0184	5.60232	8.23443	1.51314	2.68074	1.46983
nudC	657	B2HFH5	>tr|B2HFH5|B2HFH5_MYCMM NADH pyrophosphatase NudC OS=Mycobacterium marinum (strain ATCC BAA-535 / M) GN=nudC PE=4 SV=1	9	9	32.1	33.408	5.93225	3.02963	1.13101	2.58554	0.510705	2.67868	2.28604
fabH	3335	B2HRM4	>sp|B2HRM4|FABH_MYCMM 3-oxoacyl-[acyl-carrier-protein] synthase 3 OS=Mycobacterium marinum (strain ATCC BAA-535 / M) GN=fabH PE=3 SV=1	8	8	32.2	34.779	5.46465	3.02963	1.13101	2.59646	0.554405	2.67868	2.29569
MMAR_3272	1130	B2HHK0	>tr|B2HHK0|B2HHK0_MYCMM Fatty acyl-AMP ligase OS=Mycobacterium marinum (strain ATCC BAA-535 / M) GN=MMAR_3272 PE=4 SV=1	16	16	34.8	57.312	15.3785	22.1578	8.29797	6.1922	1.44083	2.67027	0.74623
MMAR_2406	2995	B2HQB3	>tr|B2HQB3|B2HQB3_MYCMM Ligase, Mur-family OS=Mycobacterium marinum (strain ATCC BAA-535 / M) GN=MMAR_2406 PE=4 SV=1	44	44	46.9	97.645	49.6724	51.1143	19.1861	33.5356	1.02903	2.66414	1.74791
MMAR_2164	2530	B2HNB5	>tr|B2HNB5|B2HNB5_MYCMM Conserved hypothetical alanine and leucine rich protein OS=Mycobacterium marinum (strain ATCC BAA-535 / M) GN=MMAR_2164 PE=4 SV=1	20	20	24	96.296	7.96318	12.9283	4.90492	12.3953	1.62351	2.63577	2.52711
MMAR_3087	740	B2HFV8	>tr|B2HFV8|B2HFV8_MYCMM Conserved protein OS=Mycobacterium marinum (strain ATCC BAA-535 / M) GN=MMAR_3087 PE=4 SV=1	16	16	30.3	54.895	12.9258	14.9011	5.65507	13.9161	1.15282	2.635	2.46081
phoP	1201	B2HHU6	>tr|B2HHU6|B2HHU6_MYCMM Two-component system response phosphate regulon transcriptional regulator, PhoP OS=Mycobacterium marinum (strain ATCC BAA-535 / M) GN=phoP PE=4 SV=1	6	5	30.4	26.668	5.95518	8.79497	3.34029	8.25626	1.47686	2.633	2.47172
MMAR_5479	2635	B2HNT0	>tr|B2HNT0|B2HNT0_MYCMM Hydrolase OS=Mycobacterium marinum (strain ATCC BAA-535 / M) GN=MMAR_5479 PE=4 SV=1	12	12	43.3	44.07	17.8426	20.5727	7.86434	11.3524	1.15301	2.61594	1.44352
thrS	2246	B2HM74	>sp|B2HM74|SYT_MYCMM Threonine--tRNA ligase OS=Mycobacterium marinum (strain ATCC BAA-535 / M) GN=thrS PE=3 SV=1	26	26	35.7	77.254	11.9333	15.5467	5.98318	13.9488	1.3028	2.59841	2.33134
MMAR_3533	1734	B2HK08	>tr|B2HK08|B2HK08_MYCMM Methyltransferase (Methylase) OS=Mycobacterium marinum (strain ATCC BAA-535 / M) GN=MMAR_3533 PE=4 SV=1	10	10	44.1	23.456	12.88	14.5369	5.60232	5.14925	1.12864	2.5948	0.919128
dnaZX	1843	B2HKE8	>tr|B2HKE8|B2HKE8_MYCMM DNA polymerase III (Subunit gamma/tau) DnaZX OS=Mycobacterium marinum (strain ATCC BAA-535 / M) GN=dnaZX PE=4 SV=1	22	22	37.8	67.603	25.3153	28.4984	10.9936	20.1301	1.12574	2.59227	1.83107
dapD	3454	B2HS66	>tr|B2HS66|B2HS66_MYCMM 2,3,4,5-tetrahydropyridine-2,6-dicarboxylate N-succinyltransferase OS=Mycobacterium marinum (strain ATCC BAA-535 / M) GN=dapD PE=3 SV=1	17	17	44.3	32.181	19.3601	22.1344	8.61449	13.9052	1.1433	2.56944	1.61416
ppsC	1437	B2HIM9	>tr|B2HIM9|B2HIM9_MYCMM Phenolpthiocerol synthesis type-I polyketide synthase PpsC OS=Mycobacterium marinum (strain ATCC BAA-535 / M) GN=ppsC PE=4 SV=1	70	68	37.3	232.42	94.2789	89.2535	34.7565	52.6446	0.946696	2.56797	1.51467
MMAR_0574	2686	B2HNZ6	>tr|B2HNZ6|B2HNZ6_MYCMM Uncharacterized protein OS=Mycobacterium marinum (strain ATCC BAA-535 / M) GN=MMAR_0574 PE=4 SV=1	7	7	20.2	41.599	5.96665	5.67155	2.20927	7.21331	0.950543	2.56716	3.26501
lipH	2715	B2HP53	>tr|B2HP53|B2HP53_MYCMM Lipase LipH OS=Mycobacterium marinum (strain ATCC BAA-535 / M) GN=lipH PE=4 SV=1	10	10	30	34.506	7.94025	3.02963	1.18377	1.55351	0.381554	2.55931	1.31234
bfrB	2365	B2HMM8	>tr|B2HMM8|B2HMM8_MYCMM Bacterioferritin BfrB OS=Mycobacterium marinum (strain ATCC BAA-535 / M) GN=bfrB PE=4 SV=1	8	8	41.3	21.985	13.9413	10.2863	4.03768	4.6496	0.737833	2.54759	1.15155
MMAR_3115	762	B2HFY6	>tr|B2HFY6|B2HFY6_MYCMM Uncharacterized protein OS=Mycobacterium marinum (strain ATCC BAA-535 / M) GN=MMAR_3115 PE=4 SV=1	11	11	64.5	26.359	7.92878	7.18637	2.85391	4.11721	0.906365	2.51808	1.44266
ceoC	2193	B2HM08	>tr|B2HM08|B2HM08_MYCMM TRK system potassium uptake protein CeoC OS=Mycobacterium marinum (strain ATCC BAA-535 / M) GN=ceoC PE=4 SV=1	6	6	30	23.734	9.42331	9.80485	3.93217	7.18056	1.04049	2.49349	1.82611
MMAR_2844	309	B2HE04	>tr|B2HE04|B2HE04_MYCMM Metal-dependent hydrolase OS=Mycobacterium marinum (strain ATCC BAA-535 / M) GN=MMAR_2844 PE=4 SV=1	10	10	24.5	48.927	12.4353	11.3431	4.57681	5.16016	0.91217	2.47839	1.12746
thiC	3070	B2HQM5	>sp|B2HQM5|THIC_MYCMM Phosphomethylpyrimidine synthase OS=Mycobacterium marinum (strain ATCC BAA-535 / M) GN=thiC PE=3 SV=1	28	28	55.1	59.418	19.3257	33.9824	13.7304	8.78865	1.75841	2.47497	0.640086
mutM	1629	B2HJJ6	>sp|B2HJJ6|FPG_MYCMM Formamidopyrimidine-DNA glycosylase OS=Mycobacterium marinum (strain ATCC BAA-535 / M) GN=mutM PE=3 SV=1	6	6	13.4	32.016	6.93625	5.71845	2.31478	2.55279	0.824429	2.4704	1.10282
pimA	2475	B2HN44	>tr|B2HN44|B2HN44_MYCMM Alpha-mannosyltransferase PimA OS=Mycobacterium marinum (strain ATCC BAA-535 / M) GN=pimA PE=4 SV=1	11	10	28.6	40.235	7.91731	8.21969	3.34029	3.59574	1.03819	2.46077	1.07648
guaA	223	B2HDP0	>sp|B2HDP0|GUAA_MYCMM GMP synthase [glutamine-hydrolyzing] OS=Mycobacterium marinum (strain ATCC BAA-535 / M) GN=guaA PE=3 SV=1	18	18	34.7	56.169	18.4019	18.0245	7.37797	13.4055	0.979491	2.44302	1.81696
rmlD	455	B2HEM6	>tr|B2HEM6|B2HEM6_MYCMM dTDP-6-deoxy-L-lyxo-4-hexulose reductase RmlD OS=Mycobacterium marinum (strain ATCC BAA-535 / M) GN=rmlD PE=4 SV=1	8	8	31.2	31.594	13.4049	15.4998	6.35246	9.78794	1.15628	2.43997	1.54081
gltB	2384	B2HMQ1	>tr|B2HMQ1|B2HMQ1_MYCMM Ferredoxin-dependent glutamate synthase [NADPH] (Large subunit) GltB OS=Mycobacterium marinum (strain ATCC BAA-535 / M) GN=gltB PE=4 SV=1	51	51	37.4	165.85	51.6804	47.5094	19.5026	39.7169	0.919293	2.43606	2.03649
nrdF2	1103	B2HHG5	>tr|B2HHG5|B2HHG5_MYCMM Ribonucleoside-diphosphate reductase subunit beta OS=Mycobacterium marinum (strain ATCC BAA-535 / M) GN=nrdF2 PE=3 SV=1	11	11	27.8	36.909	6.45718	5.57777	2.31478	3.08518	0.863808	2.40963	1.33282
ercc3	619	B2HFB2	>tr|B2HFB2|B2HFB2_MYCMM DNA helicase Ercc3 OS=Mycobacterium marinum (strain ATCC BAA-535 / M) GN=ercc3 PE=4 SV=1	23	23	43.7	60.778	15.4129	16.0048	6.68058	13.9161	1.0384	2.39572	2.08306
MMAR_2491	3218	B2HR56	>tr|B2HR56|B2HR56_MYCMM Hypothetical membrane protein OS=Mycobacterium marinum (strain ATCC BAA-535 / M) GN=MMAR_2491 PE=4 SV=1	7	5	18.5	65.709	9.91384	13.3629	5.60232	10.2985	1.3479	2.38524	1.83826
trmB	2432	B2HMX6	>tr|B2HMX6|B2HMX6_MYCMM tRNA (guanine-N(7)-)-methyltransferase OS=Mycobacterium marinum (strain ATCC BAA-535 / M) GN=trmB PE=3 SV=1	10	10	43.4	32.948	5.97811	4.0864	1.7229	2.56371	0.68356	2.37182	1.48802
fadE2	2150	B2HLU2	>tr|B2HLU2|B2HLU2_MYCMM Acyl-CoA dehydrogenase FadE2 OS=Mycobacterium marinum (strain ATCC BAA-535 / M) GN=fadE2 PE=3 SV=1	18	18	51.4	45.695	15.39	14.9246	6.29971	14.9699	0.96976	2.36909	2.37629
xerD	3230	B2HR71	>tr|B2HR71|B2HR71_MYCMM Integrase/recombinase, XerD OS=Mycobacterium marinum (strain ATCC BAA-535 / M) GN=xerD PE=3 SV=1	11	11	38.3	33.547	10.4388	6.75177	2.85391	3.08518	0.646797	2.36579	1.08104
metH	822	B2HGB8	>tr|B2HGB8|B2HGB8_MYCMM 5-methyltetrahydrofolate--homocysteine methyltransferase, MetH OS=Mycobacterium marinum (strain ATCC BAA-535 / M) GN=metH PE=3 SV=1	21	21	19.3	135.96	8.44224	7.76165	3.28753	9.27738	0.919382	2.36093	2.82199
mrp	3434	B2HS42	>tr|B2HS42|B2HS42_MYCMM Mrp-related protein Mrp OS=Mycobacterium marinum (strain ATCC BAA-535 / M) GN=mrp PE=4 SV=1	21	21	59.6	40.716	32.24	34.7687	14.7559	20.6297	1.07843	2.35625	1.39806
pks7	3206	B2HR35	>tr|B2HR35|B2HR35_MYCMM Polyketide synthase Pks7 OS=Mycobacterium marinum (strain ATCC BAA-535 / M) GN=pks7 PE=4 SV=1	24	22	13.7	221.28	11.8989	14.4431	6.14145	6.17036	1.21382	2.35174	1.00471
MMAR_2836	302	B2HDZ6	>tr|B2HDZ6|B2HDZ6_MYCMM Phosphotransferase OS=Mycobacterium marinum (strain ATCC BAA-535 / M) GN=MMAR_2836 PE=4 SV=1	21	21	30.5	67.023	1.49453	14.5134	6.24695	30.4068	9.71103	2.32328	4.86745
esxB_1	1625	B2HJI8	>tr|B2HJI8|B2HJI8_MYCMM 10 kDa culture filtrate antigen EsxB_1 OS=Mycobacterium marinum (strain ATCC BAA-535 / M) GN=esxB_1 PE=4 SV=1	9	9	93	10.737	11.3969	12.9517	5.60232	17.034	1.13642	2.31185	3.04053
MMAR_2947	519	B2HEW8	>tr|B2HEW8|B2HEW8_MYCMM HrpA-like helicase OS=Mycobacterium marinum (strain ATCC BAA-535 / M) GN=MMAR_2947 PE=4 SV=1	42	42	36.9	145.89	17.4094	20.1615	8.73159	25.7899	1.15808	2.30903	2.95363
bcp	2811	B2HPL2	>tr|B2HPL2|B2HPL2_MYCMM Bacterioferritin comigratory protein Bcp OS=Mycobacterium marinum (strain ATCC BAA-535 / M) GN=bcp PE=4 SV=1	14	14	82.2	16.993	5.97811	10.427	4.52406	5.67072	1.7442	2.30479	1.25346
zwf1	3672	B2HT25	>tr|B2HT25|B2HT25_MYCMM Glucose-6-phosphate 1-dehydrogenase OS=Mycobacterium marinum (strain ATCC BAA-535 / M) GN=zwf1 PE=3 SV=1	12	12	27.3	52.676	5.46465	5.19006	2.26203	5.67072	0.949752	2.29443	2.50692
MMAR_1341	499	B2HEU3	>tr|B2HEU3|B2HEU3_MYCMM Acetyltransferase OS=Mycobacterium marinum (strain ATCC BAA-535 / M) GN=MMAR_1341 PE=4 SV=1	5	5	31.9	17.804	5.47612	5.16662	2.26203	3.59574	0.943482	2.28406	1.58961
purD	1042	B2HH73	>tr|B2HH73|B2HH73_MYCMM Phosphoribosylamine--glycine ligase OS=Mycobacterium marinum (strain ATCC BAA-535 / M) GN=purD PE=3 SV=1	18	17	50.7	43.257	16.896	18.0245	7.9171	11.3633	1.0668	2.27666	1.43528
gcvT_1	1852	B2HKH3	>tr|B2HKH3|B2HKH3_MYCMM Aminomethyltransferase OS=Mycobacterium marinum (strain ATCC BAA-535 / M) GN=gcvT_1 PE=3 SV=1	9	9	30.9	40.011	5.44172	2.57158	1.13101	2.57462	0.472568	2.2737	2.27639
acn	2778	B2HPC7	>tr|B2HPC7|B2HPC7_MYCMM Aconitate hydratase Acn OS=Mycobacterium marinum (strain ATCC BAA-535 / M) GN=acn PE=4 SV=1	37	37	37.7	101.18	43.7401	40.8514	18.0551	27.2779	0.933958	2.2626	1.51082
fadA	624	B2HFB9	>tr|B2HFB9|B2HFB9_MYCMM Acyl-CoA thiolase FadA OS=Mycobacterium marinum (strain ATCC BAA-535 / M) GN=fadA PE=3 SV=1	14	14	47	43.966	39.2222	37.4936	16.5843	19.1199	0.955928	2.26078	1.15289
glmS	57	B2HCZ8	>tr|B2HCZ8|B2HCZ8_MYCMM Glutamine--fructose-6-phosphate aminotransferase [isomerizing] OS=Mycobacterium marinum (strain ATCC BAA-535 / M) GN=glmS PE=3 SV=1	19	19	41.8	67.694	16.8845	16.5332	7.32521	14.4266	0.979193	2.25702	1.96945
MMAR_4922	1040	B2HH71	>tr|B2HH71|B2HH71_MYCMM Uncharacterized protein OS=Mycobacterium marinum (strain ATCC BAA-535 / M) GN=MMAR_4922 PE=4 SV=1	9	9	47.4	31.988	7.91731	5.09628	2.26203	5.67072	0.643687	2.25297	2.50692
MMAR_0916	3367	B2HRR1	>tr|B2HRR1|B2HRR1_MYCMM Trypsin-like serine protease OS=Mycobacterium marinum (strain ATCC BAA-535 / M) GN=MMAR_0916 PE=4 SV=1	15	15	34.1	52.495	21.3222	21.6998	9.64	19.5868	1.01771	2.25102	2.03183
purQ	1021	B2HH46	>tr|B2HH46|B2HH46_MYCMM Phosphoribosylformylglycinamidine synthase 1 OS=Mycobacterium marinum (strain ATCC BAA-535 / M) GN=purQ PE=3 SV=1	10	10	46.9	23.646	10.9293	12.9283	5.76058	7.21331	1.1829	2.24426	1.25219
MMAR_2523	3383	B2HRU4	>tr|B2HRU4|B2HRU4_MYCMM ATPase involved in chromosome partitioning (Soj family) OS=Mycobacterium marinum (strain ATCC BAA-535 / M) GN=MMAR_2523 PE=4 SV=1	8	8	29.6	34.39	12.9144	14.9715	6.68058	9.25555	1.15929	2.24104	1.38544
MMAR_0121	1604	B2HJC2	>tr|B2HJC2|B2HJC2_MYCMM Formate dehydrogenase H OS=Mycobacterium marinum (strain ATCC BAA-535 / M) GN=MMAR_0121 PE=4 SV=1	42	42	57.2	84.744	45.6679	54.8834	24.7884	46.9629	1.20179	2.21407	1.89455
ppsA	1439	B2HIN1	>tr|B2HIN1|B2HIN1_MYCMM Phenolpthiocerol synthesis type-I polyketide synthase PpsA OS=Mycobacterium marinum (strain ATCC BAA-535 / M) GN=ppsA PE=4 SV=1	51	39	38.9	169.75	77.3486	78.1683	35.3368	37.175	1.0106	2.21209	1.05202
MMAR_5069	1527	B2HJ10	>tr|B2HJ10|B2HJ10_MYCMM Transcriptional regulatory protein (TetR-family) OS=Mycobacterium marinum (strain ATCC BAA-535 / M) GN=MMAR_5069 PE=4 SV=1	16	16	69	22.129	11.4542	9.75795	4.41855	6.70275	0.851908	2.20841	1.51696
MMAR_3547	1746	B2HK22	>tr|B2HK22|B2HK22_MYCMM Serine/threonine-protein kinase transcriptional regulatory protein OS=Mycobacterium marinum (strain ATCC BAA-535 / M) GN=MMAR_3547 PE=4 SV=1	24	24	25	112.81	16.3481	17.0147	7.70608	16.5016	1.04077	2.20795	2.14137
MMAR_4875	1003	B2HH24	>tr|B2HH24|B2HH24_MYCMM Uncharacterized protein OS=Mycobacterium marinum (strain ATCC BAA-535 / M) GN=MMAR_4875 PE=4 SV=1	6	6	54.9	10.818	22.8282	33.3477	15.1896	17.5882	1.46081	2.19544	1.15791
MMAR_2702	3633	B2HSX1	>tr|B2HSX1|B2HSX1_MYCMM Conserved protein OS=Mycobacterium marinum (strain ATCC BAA-535 / M) GN=MMAR_2702 PE=4 SV=1	7	7	25.7	26.432	7.94025	16.1689	7.37797	7.23514	2.03632	2.19151	0.980642
echA8_7	1872	B2HKK9	>tr|B2HKK9|B2HKK9_MYCMM Enoyl-CoA hydratase, EchA8_7 OS=Mycobacterium marinum (strain ATCC BAA-535 / M) GN=echA8_7 PE=4 SV=1	9	9	27.9	29.068	7.95171	6.24683	2.85391	7.21331	0.785596	2.18887	2.52752
MMAR_1518	869	B2HGI3	>tr|B2HGI3|B2HGI3_MYCMM Conserved protein OS=Mycobacterium marinum (strain ATCC BAA-535 / M) GN=MMAR_1518 PE=4 SV=1	6	6	25.3	35.974	5.95518	3.62835	1.67014	6.18128	0.609277	2.17248	3.70105
purK	441	B2HEL1	>tr|B2HEL1|B2HEL1_MYCMM Phosphoribosylaminoimidazole carboxylase ATPase subunit PurK (Air carboxylase) (AirC) OS=Mycobacterium marinum (strain ATCC BAA-535 / M) GN=purK PE=4 SV=1	7	7	20	43.214	5.44172	7.23326	3.34029	4.62777	1.32922	2.16546	1.38544
MMAR_0859	3322	B2HRK5	>tr|B2HRK5|B2HRK5_MYCMM Universal stress protein UspA OS=Mycobacterium marinum (strain ATCC BAA-535 / M) GN=MMAR_0859 PE=4 SV=1	12	12	55.1	29.99	20.8202	22.1813	10.2846	11.3087	1.06537	2.15674	1.09957
MMAR_4244	3459	B2HS74	>tr|B2HS74|B2HS74_MYCMM Uncharacterized protein OS=Mycobacterium marinum (strain ATCC BAA-535 / M) GN=MMAR_4244 PE=4 SV=1	5	5	29.2	30.012	6.45718	2.54814	1.18377	2.05315	0.394621	2.15257	1.73442
coaE	3178	B2HQZ8	>tr|B2HQZ8|B2HQZ8_MYCMM Dephospho-CoA kinase OS=Mycobacterium marinum (strain ATCC BAA-535 / M) GN=coaE PE=3 SV=1	10	10	22.5	44.488	6.95918	4.63823	2.15652	3.61757	0.666491	2.15079	1.6775
fadE15	2770	B2HPB8	>tr|B2HPB8|B2HPB8_MYCMM Acyl-CoA dehydrogenase FadE15 OS=Mycobacterium marinum (strain ATCC BAA-535 / M) GN=fadE15 PE=3 SV=1	27	24	44.3	65.871	44.7097	42.3662	19.7136	30.9391	0.947584	2.14909	1.56943
MMAR_3752	2304	B2HME8	>tr|B2HME8|B2HME8_MYCMM Conserved protein OS=Mycobacterium marinum (strain ATCC BAA-535 / M) GN=MMAR_3752 PE=4 SV=1	12	12	35.1	31.905	12.9029	13.4098	6.24695	11.3196	1.03928	2.14661	1.81202
MMAR_3751	2303	B2HME7	>tr|B2HME7|B2HME7_MYCMM Uncharacterized protein OS=Mycobacterium marinum (strain ATCC BAA-535 / M) GN=MMAR_3751 PE=4 SV=1	10	10	28	52.791	5.44172	7.28015	3.39304	3.08518	1.33784	2.14561	0.909267
fadE19	2600	B2HNK5	>tr|B2HNK5|B2HNK5_MYCMM Acyl-CoA dehydrogenase FadE19 OS=Mycobacterium marinum (strain ATCC BAA-535 / M) GN=fadE19 PE=3 SV=1	14	14	42	41.337	10.4158	7.13948	3.34029	6.67001	0.685444	2.13738	1.99684
carB	2706	B2HP44	>tr|B2HP44|B2HP44_MYCMM Carbamoyl-phosphate synthase large chain OS=Mycobacterium marinum (strain ATCC BAA-535 / M) GN=carB PE=3 SV=1	39	39	35.6	122.12	45.6335	37.059	17.3461	29.3856	0.8121	2.13645	1.69408
galE1	1578	B2HJ74	>tr|B2HJ74|B2HJ74_MYCMM UDP-glucose 4-epimerase GalE1 OS=Mycobacterium marinum (strain ATCC BAA-535 / M) GN=galE1 PE=4 SV=1	15	15	51	33.624	13.8725	13.3394	6.24695	7.2024	0.961573	2.13535	1.15295
pat	2079	B2HLJ8	>sp|B2HLJ8|PATR_MYCMM Putative phenylalanine aminotransferase OS=Mycobacterium marinum (strain ATCC BAA-535 / M) GN=pat PE=3 SV=1	9	9	30.5	38.523	6.94771	2.52469	1.18377	3.0961	0.363384	2.13276	2.61546
gatA	1371	B2HIF7	>sp|B2HIF7|GATA_MYCMM Glutamyl-tRNA(Gln) amidotransferase subunit A OS=Mycobacterium marinum (strain ATCC BAA-535 / M) GN=gatA PE=3 SV=1	12	12	34.3	51.249	6.95918	7.23326	3.39304	4.63869	1.03938	2.13179	1.36712
echA8_6	110	B2HD64	>tr|B2HD64|B2HD64_MYCMM Enoyl-CoA hydratase, EchA8_6 OS=Mycobacterium marinum (strain ATCC BAA-535 / M) GN=echA8_6 PE=1 SV=1	7	7	31.3	26.967	7.43825	6.17649	2.90667	5.14925	0.830369	2.12494	1.77153
fadD11	2961	B2HQ76	>tr|B2HQ76|B2HQ76_MYCMM Fatty-acid-CoA ligase, FadD11 OS=Mycobacterium marinum (strain ATCC BAA-535 / M) GN=fadD11 PE=4 SV=1	15	15	26.2	65.384	7.97464	14.49	6.83884	13.4273	1.81701	2.11878	1.96339
MMAR_3205	934	B2HGS8	>tr|B2HGS8|B2HGS8_MYCMM Uncharacterized protein OS=Mycobacterium marinum (strain ATCC BAA-535 / M) GN=MMAR_3205 PE=4 SV=1	10	10	52.8	23.761	4.46066	8.29003	3.93217	10.2985	1.85848	2.10826	2.61903
serB	1766	B2HK57	>tr|B2HK57|B2HK57_MYCMM Phosphoserine phosphatase SerB OS=Mycobacterium marinum (strain ATCC BAA-535 / M) GN=serB PE=4 SV=1	13	13	50.2	30.75	33.1982	33.1601	15.7814	15.4259	0.998854	2.10121	0.977471
gcvB	3639	B2HSX7;B2HKH4	>tr|B2HSX7|B2HSX7_MYCMM Glycine dehydrogenase [decarboxylating] OS=Mycobacterium marinum (strain ATCC BAA-535 / M) GN=gcvB PE=3 SV=1	22	22	31.6	100.46	14.9453	16.0751	7.65333	17.0231	1.0756	2.10041	2.22427
MMAR_0267	1885	B2HKN0	>tr|B2HKN0|B2HKN0_MYCMM Conserved integral membrane protein OS=Mycobacterium marinum (strain ATCC BAA-535 / M) GN=MMAR_0267 PE=4 SV=1	7	7	13.4	70.527	8.43078	11.8715	5.65507	11.8847	1.40811	2.09927	2.10161
MMAR_1556	899	B2HGM2	>tr|B2HGM2|B2HGM2_MYCMM Conserved hypothetical dehydrogenase OS=Mycobacterium marinum (strain ATCC BAA-535 / M) GN=MMAR_1556 PE=4 SV=1	13	13	42.2	41.009	10.9178	9.71106	4.62956	3.61757	0.889467	2.09762	0.781407
efpA	1900	B2HKR5	>tr|B2HKR5|B2HKR5_MYCMM Integral membrane efflux protein EfpA OS=Mycobacterium marinum (strain ATCC BAA-535 / M) GN=efpA PE=4 SV=1	7	7	12.6	55.509	8.44224	8.24314	3.93217	4.11721	0.976416	2.09633	1.04706
alaS	2535	B2HNC1	>sp|B2HNC1|SYA_MYCMM Alanine--tRNA ligase OS=Mycobacterium marinum (strain ATCC BAA-535 / M) GN=alaS PE=3 SV=1	36	36	42.6	96.489	27.3118	39.8416	19.0162	30.4723	1.45877	2.09513	1.60243
MMAR_1889	1902	B2HKR7	>tr|B2HKR7|B2HKR7_MYCMM Conserved hypothetical alanine rich protein OS=Mycobacterium marinum (strain ATCC BAA-535 / M) GN=MMAR_1889 PE=4 SV=1	11	11	48.8	16.893	10.4388	17.6837	8.45623	11.852	1.69404	2.09121	1.40157
fadE5	2466	B2HN30	>tr|B2HN30|B2HN30_MYCMM Acyl-CoA dehydrogenase FadE5 OS=Mycobacterium marinum (strain ATCC BAA-535 / M) GN=fadE5 PE=3 SV=1	25	22	40.8	66.396	34.2136	29.3442	14.0585	22.1832	0.857675	2.08729	1.57792
MMAR_2830	151	B2HDD3	>tr|B2HDD3|B2HDD3_MYCMM Uncharacterized protein OS=Mycobacterium marinum (strain ATCC BAA-535 / M) GN=MMAR_2830 PE=4 SV=1	22	6	31.9	95.059	22.8282	26.3849	12.7165	18.0442	1.1558	2.07485	1.41896
MMAR_2074	2234	B2HM60	>tr|B2HM60|B2HM60_MYCMM Uncharacterized protein OS=Mycobacterium marinum (strain ATCC BAA-535 / M) GN=MMAR_2074 PE=4 SV=1	17	17	49.2	27.223	19.3372	22.2047	10.7183	15.4587	1.14829	2.07167	1.44227
ahpD	105	B2HD59	>sp|B2HD59|AHPD_MYCMM Alkyl hydroperoxide reductase AhpD OS=Mycobacterium marinum (strain ATCC BAA-535 / M) GN=ahpD PE=3 SV=1	8	8	30.9	18.647	6.93625	4.66168	2.26203	2.56371	0.672075	2.06084	1.13337
cysG	1899	B2HKR4	>tr|B2HKR4|B2HKR4_MYCMM Multifunctional enzyme siroheme synthase CysG OS=Mycobacterium marinum (strain ATCC BAA-535 / M) GN=cysG PE=4 SV=1	13	13	38.7	42.037	8.95571	10.3098	5.01043	8.78865	1.1512	2.05766	1.75407
recA	1959	B2HL06	>sp|B2HL06|RECA_MYCMM Protein RecA OS=Mycobacterium marinum (strain ATCC BAA-535 / M) GN=recA PE=3 SV=1	24	24	54.3	36.893	53.5623	31.1295	15.1368	19.6305	0.581183	2.05654	1.29687
citA	599	B2HF84	>tr|B2HF84|B2HF84_MYCMM Citrate synthase II CitA OS=Mycobacterium marinum (strain ATCC BAA-535 / M) GN=citA PE=3 SV=1	12	11	33.2	40.143	9.92531	12.8345	6.24695	8.24535	1.29311	2.05452	1.3199
aroC	2538	B2HNC6	>sp|B2HNC6|AROC_MYCMM Chorismate synthase OS=Mycobacterium marinum (strain ATCC BAA-535 / M) GN=aroC PE=3 SV=1	14	14	40.5	42.546	13.9298	9.27646	4.52406	5.182	0.665942	2.05047	1.14543
lexA	2166	B2HLX8	>sp|B2HLX8|LEXA_MYCMM LexA repressor OS=Mycobacterium marinum (strain ATCC BAA-535 / M) GN=lexA PE=3 SV=1	5	5	38.9	25.736	5.96665	4.63823	2.26203	5.13833	0.777359	2.05047	2.27156
MMAR_1682	1358	B2HID8	>tr|B2HID8|B2HID8_MYCMM Conserved protein OS=Mycobacterium marinum (strain ATCC BAA-535 / M) GN=MMAR_1682 PE=4 SV=1	12	12	21.8	58.402	6.94771	4.61478	2.26203	5.14925	0.664216	2.04011	2.27639
lipM	1481	B2HIU7	>tr|B2HIU7|B2HIU7_MYCMM Membrane-bound esterase LipM OS=Mycobacterium marinum (strain ATCC BAA-535 / M) GN=lipM PE=4 SV=1	11	11	24	45.676	15.9264	14.9949	7.37797	4.67144	0.941516	2.03239	0.63316
ispG	1670	B2HJQ1;B2HKN7	>tr|B2HJQ1|B2HJQ1_MYCMM 4-hydroxy-3-methylbut-2-en-1-yl diphosphate synthase OS=Mycobacterium marinum (strain ATCC BAA-535 / M) GN=ispG PE=3 SV=1	17	17	49.6	40.628	26.2734	23.1443	11.4156	22.7047	0.880901	2.02742	1.98891
moeB1	509	B2HEV4	>tr|B2HEV4|B2HEV4_MYCMM Molybdenum cofactor biosynthesis protein MoeB1 OS=Mycobacterium marinum (strain ATCC BAA-535 / M) GN=moeB1 PE=4 SV=1	10	10	25.4	42.27	8.44224	7.7382	3.82666	8.25626	0.916605	2.02218	2.15756
porA	2568	B2HNG0	>tr|B2HNG0|B2HNG0_MYCMM Pyruvate:ferredoxin oxidoreductase, PorA, alpha subunit OS=Mycobacterium marinum (strain ATCC BAA-535 / M) GN=porA PE=4 SV=1	20	20	36	69.213	28.2814	24.7763	12.2829	15.4805	0.876064	2.01714	1.26033
argG	3203	B2HR32	>sp|B2HR32|ASSY_MYCMM Argininosuccinate synthase OS=Mycobacterium marinum (strain ATCC BAA-535 / M) GN=argG PE=3 SV=1	16	16	36.4	43.883	19.8735	21.6529	10.771	22.1942	1.08953	2.01029	2.06055
mas	1430	B2HIM2	>tr|B2HIM2|B2HIM2_MYCMM Multifunctional mycocerosic acid synthase membrane-associated Mas OS=Mycobacterium marinum (strain ATCC BAA-535 / M) GN=mas PE=4 SV=1	81	79	39.3	222.94	198.38	170.428	84.9663	130.003	0.859099	2.00583	1.53006
ppnK	3224	B2HR65	>tr|B2HR65|B2HR65_MYCMM Probable inorganic polyphosphate/ATP-NAD kinase OS=Mycobacterium marinum (strain ATCC BAA-535 / M) GN=ppnK PE=3 SV=1	12	12	39.7	32.939	5.45319	4.63823	2.31478	5.69255	0.850554	2.00374	2.45922
mmaA4	3525	B2HSH5	>tr|B2HSH5|B2HSH5_MYCMM Methoxy mycolic acid synthase 4, MmaA4 OS=Mycobacterium marinum (strain ATCC BAA-535 / M) GN=mmaA4 PE=4 SV=1	20	19	54.5	34.377	56.0608	48.6131	24.3432	33.5684	0.867149	1.99699	1.37896
pknK_3	2144	B2HLT4	>tr|B2HLT4|B2HLT4_MYCMM Serine/threonine-protein kinase transcriptional regulatory protein PknK_3 OS=Mycobacterium marinum (strain ATCC BAA-535 / M) GN=pknK_3 PE=4 SV=1	15	13	16.8	109.32	5.95518	7.71475	3.87942	3.61757	1.29547	1.98864	0.932504
MMAR_4572	406	B2HEF2	>tr|B2HEF2|B2HEF2_MYCMM Bifunctional enzyme: 2-hydroxyhepta-2,4-diene-1,7-dioate isomerase (HHDD isomerase) + cyclase/dehydrase OS=Mycobacterium marinum (strain ATCC BAA-535 / M) GN=MMAR_4572 PE=4 SV=1	13	13	21	69.19	6.43425	5.67155	2.85391	6.1922	0.881463	1.98729	2.16972
MMAR_1713	1381	B2HIG8	>tr|B2HIG8|B2HIG8_MYCMM Conserved protein OS=Mycobacterium marinum (strain ATCC BAA-535 / M) GN=MMAR_1713 PE=4 SV=1	4	4	29	21.202	5.45319	6.70488	3.39304	4.62777	1.22953	1.97607	1.3639
papA5	1431	B2HIM3	>tr|B2HIM3|B2HIM3_MYCMM Conserved polyketide synthase associated protein PapA5 OS=Mycobacterium marinum (strain ATCC BAA-535 / M) GN=papA5 PE=4 SV=1	14	14	34.1	45.379	25.3153	26.2677	13.3084	14.4485	1.03762	1.97377	1.08566
murC	922	B2HGR5	>sp|B2HGR5|MURC_MYCMM UDP-N-acetylmuramate--L-alanine ligase OS=Mycobacterium marinum (strain ATCC BAA-535 / M) GN=murC PE=3 SV=1	15	15	36.3	50.753	9.42331	10.9554	5.60232	6.70275	1.16259	1.95551	1.19643
leuA	1829	B2HKD3	>tr|B2HKD3|B2HKD3_MYCMM 2-isopropylmalate synthase OS=Mycobacterium marinum (strain ATCC BAA-535 / M) GN=leuA PE=3 SV=1	27	27	49.5	66.073	29.753	48.0847	24.6185	40.2056	1.61613	1.95319	1.63314
MMAR_4147	3264	B2HRC3	>tr|B2HRC3|B2HRC3_MYCMM Transmembrane ATP-binding protein ABC transporter OS=Mycobacterium marinum (strain ATCC BAA-535 / M) GN=MMAR_4147 PE=3 SV=1	13	13	23.8	62.209	9.42331	11.8715	6.08869	10.8418	1.2598	1.94976	1.78065
mdh	3300	B2HRH5	>sp|B2HRH5|MDH_MYCMM Malate dehydrogenase OS=Mycobacterium marinum (strain ATCC BAA-535 / M) GN=mdh PE=3 SV=1	24	24	60.8	34.624	29.7759	35.133	18.149	35.6433	1.17991	1.93581	1.96393
MMAR_3234	953	B2HGV7	>tr|B2HGV7|B2HGV7_MYCMM Conserved hypothetical secreted protein OS=Mycobacterium marinum (strain ATCC BAA-535 / M) GN=MMAR_3234 PE=4 SV=1	11	11	35.8	39.378	18.3676	16.4628	8.50898	8.27809	0.8963	1.93476	0.972865
MMAR_3137	773	B2HG07	>tr|B2HG07|B2HG07_MYCMM Esterase/lipase OS=Mycobacterium marinum (strain ATCC BAA-535 / M) GN=MMAR_3137 PE=4 SV=1	11	11	41.4	34.771	11.4313	8.72463	4.52406	10.82	0.763223	1.9285	2.39165
ppiA	1294	B2HI56	>tr|B2HI56|B2HI56_MYCMM Peptidyl-prolyl cis-trans isomerase OS=Mycobacterium marinum (strain ATCC BAA-535 / M) GN=ppiA PE=3 SV=1	7	7	41.2	19.303	20.3068	19.6097	10.1791	13.927	0.965674	1.92646	1.36819
MMAR_0854	3319	B2HRK0	>tr|B2HRK0|B2HRK0_MYCMM Membrane acyltransferase OS=Mycobacterium marinum (strain ATCC BAA-535 / M) GN=MMAR_0854 PE=4 SV=1	3	3	5.5	49.493	7.44971	9.85174	5.11594	7.21331	1.32243	1.92569	1.40997
MMAR_0970	3519	B2HSG8	>tr|B2HSG8|B2HSG8_MYCMM UPF0336 protein MMAR_0970 OS=Mycobacterium marinum (strain ATCC BAA-535 / M) GN=MMAR_0970 PE=3 SV=1	9	9	70.5	18.513	11.8989	11.8012	6.14145	8.78865	0.991785	1.92156	1.43104
dnaN	1286	B2HI47	>tr|B2HI47|B2HI47_MYCMM DNA polymerase III subunit beta OS=Mycobacterium marinum (strain ATCC BAA-535 / M) GN=dnaN PE=3 SV=1	22	22	43.8	42.283	10.4158	12.9283	6.73333	13.9161	1.24121	1.92004	2.06674
MMAR_1795	1639	B2HJK8	>tr|B2HJK8|B2HJK8_MYCMM D-amino acid aminohydrolase OS=Mycobacterium marinum (strain ATCC BAA-535 / M) GN=MMAR_1795 PE=4 SV=1	20	20	39.2	65.321	26.2275	26.8898	14.0058	12.3626	1.02525	1.91991	0.882675
MMAR_4990	1243	B2HHZ4	>tr|B2HHZ4|B2HHZ4_MYCMM Short-chain type dehydrogenase/reductase OS=Mycobacterium marinum (strain ATCC BAA-535 / M) GN=MMAR_4990 PE=3 SV=1	8	8	34.3	30.94	5.96665	3.09997	1.61739	6.20311	0.519549	1.91665	3.83526
mbtC	2259	B2HM90	>tr|B2HM90|B2HM90_MYCMM Polyketide synthase MbtC OS=Mycobacterium marinum (strain ATCC BAA-535 / M) GN=mbtC PE=3 SV=1	11	11	34.2	45.421	11.4084	12.9048	6.73333	6.72459	1.13117	1.91656	0.998701
rpmC	3578	B2HSN9	>sp|B2HSN9|RL29_MYCMM 50S ribosomal protein L29 OS=Mycobacterium marinum (strain ATCC BAA-535 / M) GN=rpmC PE=3 SV=1	11	11	78.8	9.1562	5.92079	9.7814	5.11594	11.3196	1.65204	1.91195	2.21262
fusA	3558	B2HSL2	>sp|B2HSL2|EFG_MYCMM Elongation factor G OS=Mycobacterium marinum (strain ATCC BAA-535 / M) GN=fusA PE=3 SV=1	45	45	51.5	76.964	85.7908	106.432	55.8649	116.033	1.2406	1.90517	2.07702
recG	1407	B2HIJ7	>tr|B2HIJ7|B2HIJ7_MYCMM ATP-dependent DNA helicase RecG OS=Mycobacterium marinum (strain ATCC BAA-535 / M) GN=recG PE=4 SV=1	26	26	41.9	80.694	12.9144	13.5035	7.1142	14.9699	1.04562	1.89811	2.10423
pyrG	3228	B2HR69	>sp|B2HR69|PYRG_MYCMM CTP synthase OS=Mycobacterium marinum (strain ATCC BAA-535 / M) GN=pyrG PE=3 SV=1	29	29	44.6	63.716	58.2956	48.2019	25.4742	23.2044	0.826853	1.89219	0.910897
mmpL13	3489	B2HSD3	>tr|B2HSD3|B2HSD3_MYCMM Conserved transmembrane transport protein MmpL13 OS=Mycobacterium marinum (strain ATCC BAA-535 / M) GN=mmpL13 PE=4 SV=1	15	15	23.1	81.901	14.4089	16.5801	8.8371	14.9481	1.15068	1.87619	1.69152
gltD	2383	B2HMQ0	>tr|B2HMQ0|B2HMQ0_MYCMM NADH-dependent glutamate synthase (Small subunit) GltD OS=Mycobacterium marinum (strain ATCC BAA-535 / M) GN=gltD PE=4 SV=1	23	23	53.7	53.205	22.3377	17.1553	9.15362	11.8847	0.768	1.87416	1.29837
ilvB1	1378	B2HIG5	>tr|B2HIG5|B2HIG5_MYCMM Acetolactate synthase OS=Mycobacterium marinum (strain ATCC BAA-535 / M) GN=ilvB1 PE=3 SV=1	18	18	31.7	66.076	29.7645	29.4614	15.7814	31.4715	0.989819	1.86684	1.99421
fadD28	1428	B2HIM0	>sp|B2HIM0|FAA28_MYCMM Long-chain-fatty-acid--AMP ligase FadD28 OS=Mycobacterium marinum (strain ATCC BAA-535 / M) GN=fadD28 PE=3 SV=1	21	19	29.5	62.274	28.2814	32.5614	17.4516	22.1614	1.15134	1.86581	1.26988
MMAR_0474	2447	B2HN00	>tr|B2HN00|B2HN00_MYCMM Glycosyltransferase OS=Mycobacterium marinum (strain ATCC BAA-535 / M) GN=MMAR_0474 PE=4 SV=1	7	7	24	42.34	6.43425	4.10985	2.20927	3.59574	0.638745	1.86027	1.62757
ctpE	430	B2HEK0	>tr|B2HEK0|B2HEK0_MYCMM Metal cation transporter ATPase p-type CtpE OS=Mycobacterium marinum (strain ATCC BAA-535 / M) GN=ctpE PE=3 SV=1	20	20	26.8	84.306	20.8431	22.2047	11.9664	21.6836	1.06533	1.85559	1.81205
fadB	623	B2HFB8	>tr|B2HFB8|B2HFB8_MYCMM Fatty oxidation protein FadB OS=Mycobacterium marinum (strain ATCC BAA-535 / M) GN=fadB PE=4 SV=1	37	37	40.3	75.671	82.8591	75.9844	41.0035	53.6439	0.917032	1.85312	1.30828
iniA	2700	B2HP35	>tr|B2HP35|B2HP35_MYCMM Uncharacterized protein OS=Mycobacterium marinum (strain ATCC BAA-535 / M) GN=iniA PE=4 SV=1	18	18	32.7	67.69	14.8994	7.18637	3.87942	10.3422	0.482325	1.85243	2.6659
MMAR_2389	2978	B2HQ96	>tr|B2HQ96|B2HQ96_MYCMM Conserved hypothetical membrane protein OS=Mycobacterium marinum (strain ATCC BAA-535 / M) GN=MMAR_2389 PE=4 SV=1	9	9	24.6	49.346	6.94771	7.28015	3.93217	2.06407	1.04785	1.85143	0.524917
MMAR_1120	62	B2HD04	>tr|B2HD04|B2HD04_MYCMM Conserved hypothetical hydrolase OS=Mycobacterium marinum (strain ATCC BAA-535 / M) GN=MMAR_1120 PE=4 SV=1	9	9	31.4	40.825	9.42331	10.2629	5.54956	2.57462	1.0891	1.84932	0.463933
MMAR_5283	2054	B2HLF5	>tr|B2HLF5|B2HLF5_MYCMM Non-ribosomal peptide synthetase OS=Mycobacterium marinum (strain ATCC BAA-535 / M) GN=MMAR_5283 PE=4 SV=1	31	31	23.9	138.37	36.2446	39.8416	21.6064	38.663	1.09924	1.84397	1.78943
MMAR_2404	2993	B2HQB1	>tr|B2HQB1|B2HQB1_MYCMM Uncharacterized protein OS=Mycobacterium marinum (strain ATCC BAA-535 / M) GN=MMAR_2404 PE=4 SV=1	3	3	25.4	11.869	5.45319	5.14317	2.80116	5.69255	0.943149	1.83609	2.03221
echA21	2081	B2HLK1	>tr|B2HLK1|B2HLK1_MYCMM Enoyl-CoA hydratase, EchA21 OS=Mycobacterium marinum (strain ATCC BAA-535 / M) GN=echA21 PE=4 SV=1	8	8	28.1	29.002	5.96665	6.1296	3.34029	12.8513	1.02731	1.83505	3.84736
MMAR_5088	1543	B2HJ29	>tr|B2HJ29|B2HJ29_MYCMM Carbonic anhydrase OS=Mycobacterium marinum (strain ATCC BAA-535 / M) GN=MMAR_5088 PE=3 SV=1	7	7	33.7	21.81	14.9109	12.4468	6.78608	9.75519	0.834744	1.83416	1.43753
MMAR_0791	3118	B2HQT1	>tr|B2HQT1|B2HQT1_MYCMM Uncharacterized protein OS=Mycobacterium marinum (strain ATCC BAA-535 / M) GN=MMAR_0791 PE=4 SV=1	5	5	21.2	30.232	6.94771	6.19994	3.39304	5.17108	0.892371	1.82725	1.52402
ftsW	924	B2HGR7	>tr|B2HGR7|B2HGR7_MYCMM FtsW-like protein FtsW OS=Mycobacterium marinum (strain ATCC BAA-535 / M) GN=ftsW PE=4 SV=1	7	7	18.4	58.09	5.95518	6.19994	3.39304	3.60666	1.0411	1.82725	1.06296
fadB2	3120	B2HQT3	>tr|B2HQT3|B2HQT3_MYCMM 3-hydroxybutyryl-CoA dehydrogenase FadB2 OS=Mycobacterium marinum (strain ATCC BAA-535 / M) GN=fadB2 PE=4 SV=1	9	9	34	30.905	5.47612	4.13329	2.26203	10.2657	0.754785	1.82725	4.53829
galU	368	B2HEA2	>tr|B2HEA2|B2HEA2_MYCMM UTP--glucose-1-phosphate uridylyltransferase GalU OS=Mycobacterium marinum (strain ATCC BAA-535 / M) GN=galU PE=4 SV=1	8	8	20.3	32.193	9.92531	7.16292	3.93217	7.75662	0.721683	1.82162	1.9726
lipL	2798	B2HPF0	>tr|B2HPF0|B2HPF0_MYCMM Conserved hypothetical esterase LipL OS=Mycobacterium marinum (strain ATCC BAA-535 / M) GN=lipL PE=4 SV=1	9	9	22.9	45.526	7.44971	5.19006	2.85391	1.03203	0.69668	1.81858	0.36162
MMAR_0672	2862	B2HPV6	>tr|B2HPV6|B2HPV6_MYCMM Conserved protein OS=Mycobacterium marinum (strain ATCC BAA-535 / M) GN=MMAR_0672 PE=4 SV=1	4	4	35.7	15.064	5.45319	5.19006	2.85391	3.61757	0.951749	1.81858	1.26758
MMAR_3076	729	B2HFU7	>tr|B2HFU7|B2HFU7_MYCMM 5-3 exonuclease OS=Mycobacterium marinum (strain ATCC BAA-535 / M) GN=MMAR_3076 PE=4 SV=1	10	10	39.3	33.501	7.44971	3.02963	1.67014	4.63869	0.406677	1.81399	2.77742
lipA	1139	B2HHL4	>sp|B2HHL4|LIPA_MYCMM Lipoyl synthase OS=Mycobacterium marinum (strain ATCC BAA-535 / M) GN=lipA PE=3 SV=1	9	9	33.3	36.02	8.43078	6.15305	3.39304	4.6496	0.729831	1.81343	1.37034
proV_1	1316	B2HI79	>tr|B2HI79|B2HI79_MYCMM Osmoprotectant (Glycine betaine/carnitine/choline/L-proline) transport ATP-binding protein ABC transporter ProV_1 OS=Mycobacterium marinum (strain ATCC BAA-535 / M) GN=proV_1 PE=3 SV=1	7	7	20.6	43.544	7.95171	5.16662	2.85391	2.06407	0.649749	1.81036	0.723241
MMAR_2578	3407	B2HRZ4	>tr|B2HRZ4|B2HRZ4_MYCMM Metal cation transporter p-type ATPase a, CtpF OS=Mycobacterium marinum (strain ATCC BAA-535 / M) GN=MMAR_2578 PE=3 SV=1	19	19	25.8	87.148	11.4313	16.0282	8.88985	23.248	1.40214	1.80298	2.61512
fadD22	1424	B2HIL6	>sp|B2HIL6|FAA22_MYCMM p-hydroxybenzoic acid--AMP ligase FadD22 OS=Mycobacterium marinum (strain ATCC BAA-535 / M) GN=fadD22 PE=1 SV=1	21	21	37.2	75.18	31.2934	24.2714	13.4667	10.8745	0.775607	1.80233	0.807516
MMAR_1374	667	B2HFI8	>tr|B2HFI8|B2HFI8_MYCMM Peptidyl-prolyl cis-trans isomerase OS=Mycobacterium marinum (strain ATCC BAA-535 / M) GN=MMAR_1374 PE=4 SV=1	3	3	29.8	13.099	5.45319	4.15674	2.31478	1.02112	0.762259	1.79574	0.441129
cysD	3250	B2HRA9	>tr|B2HRA9|B2HRA9_MYCMM Sulfate adenylyltransferase subunit 2 OS=Mycobacterium marinum (strain ATCC BAA-535 / M) GN=cysD PE=3 SV=1	15	15	47.4	34.927	14.4089	10.2394	5.70782	6.71367	0.710634	1.79393	1.17622
serA1	1383	B2HIH0	>tr|B2HIH0|B2HIH0_MYCMM D-3-phosphoglycerate dehydrogenase SerA1 OS=Mycobacterium marinum (strain ATCC BAA-535 / M) GN=serA1 PE=3 SV=1	27	27	51.9	54.237	43.7287	41.2391	23.0012	33.5356	0.943069	1.79292	1.458
MMAR_3955	2810	B2HPL1	>tr|B2HPL1|B2HPL1_MYCMM Conserved membrane protein OS=Mycobacterium marinum (strain ATCC BAA-535 / M) GN=MMAR_3955 PE=4 SV=1	4	4	57.3	8.2535	9.4577	13.022	7.27246	13.9597	1.37687	1.7906	1.91953
MMAR_5334	2086	B2HLK6	>tr|B2HLK6|B2HLK6_MYCMM Conserved transmembrane protein OS=Mycobacterium marinum (strain ATCC BAA-535 / M) GN=MMAR_5334 PE=4 SV=1	6	6	9.6	71.153	8.40785	9.82829	5.49681	8.7559	1.16894	1.788	1.59291
mca	3703	B2HT71	>tr|B2HT71|B2HT71_MYCMM Mycothiol conjugate amidase Mca OS=Mycobacterium marinum (strain ATCC BAA-535 / M) GN=mca PE=4 SV=1	6	6	16.9	32.748	5.96665	5.19006	2.90667	2.56371	0.869845	1.78557	0.88201
purB	1035	B2HH65	>tr|B2HH65|B2HH65_MYCMM Adenylosuccinate lyase, PurB OS=Mycobacterium marinum (strain ATCC BAA-535 / M) GN=purB PE=4 SV=1	20	20	46.5	51.251	10.9064	7.76165	4.36579	9.77702	0.711662	1.77783	2.23946
sseA	434	B2HEK4	>tr|B2HEK4|B2HEK4_MYCMM Sulfurtransferase OS=Mycobacterium marinum (strain ATCC BAA-535 / M) GN=sseA PE=4 SV=1	12	12	44.5	33.325	11.9104	7.16292	4.03768	4.66052	0.601402	1.77402	1.15426
glpX	3688	B2HT53	>tr|B2HT53|B2HT53_MYCMM Fructose-1,6-bisphosphatase OS=Mycobacterium marinum (strain ATCC BAA-535 / M) GN=glpX PE=3 SV=1	13	13	39.5	37.798	11.3625	11.848	6.68058	9.79885	1.04273	1.77351	1.46677
MMAR_1017	3561	B2HSL6	>tr|B2HSL6|B2HSL6_MYCMM Ferredoxin reductase OS=Mycobacterium marinum (strain ATCC BAA-535 / M) GN=MMAR_1017 PE=4 SV=1	15	15	44.4	43.55	23.3302	23.7664	13.4139	23.2153	1.0187	1.77178	1.73069
icd2	1621	B2HJF9	>tr|B2HJF9|B2HJF9_MYCMM Isocitrate dehydrogenase [NADP] Icd2 OS=Mycobacterium marinum (strain ATCC BAA-535 / M) GN=icd2 PE=3 SV=1	32	32	44.6	82.349	32.7535	41.5674	23.4875	43.8559	1.2691	1.76976	1.8672
thiO	2896	B2HQ00	>tr|B2HQ00|B2HQ00_MYCMM Thiamine biosynthesis oxidoreductase ThiO OS=Mycobacterium marinum (strain ATCC BAA-535 / M) GN=thiO PE=4 SV=1	9	9	26.8	36.049	7.46118	4.0864	2.31478	3.61757	0.547688	1.76535	1.56281
gloB	3514	B2HSG3	>tr|B2HSG3|B2HSG3_MYCMM Glyoxalase II, GloB OS=Mycobacterium marinum (strain ATCC BAA-535 / M) GN=gloB PE=4 SV=1	8	8	39.1	26.016	5.95518	11.9653	6.78608	6.20311	2.00922	1.76321	0.914093
MMAR_3344	1183	B2HHS2	>tr|B2HHS2|B2HHS2_MYCMM Flavoprotein OS=Mycobacterium marinum (strain ATCC BAA-535 / M) GN=MMAR_3344 PE=4 SV=1	10	10	23.2	55.387	8.46517	7.7382	4.41855	5.68164	0.914122	1.7513	1.28586
MMAR_4440	166	B2HDG3	>tr|B2HDG3|B2HDG3_MYCMM Uncharacterized protein OS=Mycobacterium marinum (strain ATCC BAA-535 / M) GN=MMAR_4440 PE=4 SV=1	18	18	42.7	39.48	10.3929	8.77152	5.01043	9.77702	0.843991	1.75065	1.95133
cya	3172	B2HQZ2	>tr|B2HQZ2|B2HQZ2_MYCMM Membrane-anchored adenylyl cyclase Cya OS=Mycobacterium marinum (strain ATCC BAA-535 / M) GN=cya PE=3 SV=1	8	8	21.1	48.474	6.93625	7.76165	4.4713	7.7457	1.119	1.73588	1.73231
hisG	753	B2HFX4	>tr|B2HFX4|B2HFX4_MYCMM ATP phosphoribosyltransferase OS=Mycobacterium marinum (strain ATCC BAA-535 / M) GN=hisG PE=3 SV=1	12	12	32.2	30.805	6.94771	9.89863	5.70782	9.7661	1.42473	1.73422	1.711
aroG	941	B2HGU5;B2HJR7	>tr|B2HGU5|B2HGU5_MYCMM 3-deoxy-D-arabino-heptulosonate 7-phosphate synthase AroG OS=Mycobacterium marinum (strain ATCC BAA-535 / M) GN=aroG PE=4 SV=1	17	17	52.4	50.609	31.2361	27.4417	15.8342	20.6407	0.878526	1.73306	1.30355
ddlA	1400	B2HII8	>tr|B2HII8|B2HII8_MYCMM D-alanine--D-alanine ligase OS=Mycobacterium marinum (strain ATCC BAA-535 / M) GN=ddlA PE=3 SV=1	13	13	41.8	39.701	13.9298	11.848	6.83884	11.3196	0.850552	1.73246	1.65519
MMAR_3033	573	B2HF52	>tr|B2HF52|B2HF52_MYCMM Conserved hypothetical membrane protein OS=Mycobacterium marinum (strain ATCC BAA-535 / M) GN=MMAR_3033 PE=4 SV=1	9	9	16.2	56.337	12.4009	6.70488	3.87942	5.67072	0.540677	1.72832	1.46175
MMAR_3503	1716	B2HJY0	>tr|B2HJY0|B2HJY0_MYCMM Metal cation transporter p-type ATPase OS=Mycobacterium marinum (strain ATCC BAA-535 / M) GN=MMAR_3503 PE=3 SV=1	24	24	28.3	81.378	24.8018	30.5416	17.6742	35.5888	1.23143	1.72804	2.0136
tesA	1441	B2HIN3	>tr|B2HIN3|B2HIN3_MYCMM Thioesterase TesA OS=Mycobacterium marinum (strain ATCC BAA-535 / M) GN=tesA PE=4 SV=1	16	16	58.6	27.601	23.3302	24.2714	14.0585	18.066	1.04034	1.72645	1.28506
ilvC	1380	B2HIG7	>tr|B2HIG7|B2HIG7_MYCMM Ketol-acid reductoisomerase OS=Mycobacterium marinum (strain ATCC BAA-535 / M) GN=ilvC PE=3 SV=1	27	27	46.1	36.988	84.3536	111.646	64.8487	86.6798	1.32354	1.72164	1.33665
mmaA5_1	3527	B2HSH7;B2HE79	>tr|B2HSH7|B2HSH7_MYCMM Methoxy mycolic acid synthase 5 MmaA5_1 OS=Mycobacterium marinum (strain ATCC BAA-535 / M) GN=mmaA5_1 PE=4 SV=1	14	6	50	32.906	12.4468	14.6072	8.50898	12.884	1.17357	1.71668	1.51417
ilvE	970	B2HGX9	>tr|B2HGX9|B2HGX9_MYCMM Branched-chain-amino-acid aminotransferase OS=Mycobacterium marinum (strain ATCC BAA-535 / M) GN=ilvE PE=3 SV=1	15	15	39.4	39.826	7.94025	15.5467	9.10087	13.4273	1.95797	1.70827	1.47539
ribG	2722	B2HP63	>tr|B2HP63|B2HP63_MYCMM Bifunctional riboflavin biosynthesis protein RibG OS=Mycobacterium marinum (strain ATCC BAA-535 / M) GN=ribG PE=4 SV=1	18	18	61.9	35.299	18.3676	14.4196	8.45623	13.9488	0.78506	1.70521	1.64953
ilvB1_1	860	B2HGH3	>tr|B2HGH3|B2HGH3_MYCMM Acetolactate synthase (Large subunit) IlvB1_1 OS=Mycobacterium marinum (strain ATCC BAA-535 / M) GN=ilvB1_1 PE=3 SV=1	11	11	30.9	59.523	5.46465	5.67155	3.34029	6.18128	1.03786	1.69792	1.85052
argD	3200	B2HR29	>tr|B2HR29|B2HR29_MYCMM Acetylornithine aminotransferase OS=Mycobacterium marinum (strain ATCC BAA-535 / M) GN=argD PE=3 SV=1	9	9	30.6	40.681	5.45319	5.67155	3.34029	5.14925	1.04004	1.69792	1.54156
fadH	3472	B2HSA7	>tr|B2HSA7|B2HSA7_MYCMM NADPH dependent 2,4-dienoyl-CoA reductase FadH OS=Mycobacterium marinum (strain ATCC BAA-535 / M) GN=fadH PE=4 SV=1	41	41	47	72.574	58.5593	53.6625	31.6156	43.8559	0.916378	1.69734	1.38716
ppsB	1438	B2HIN0	>tr|B2HIN0|B2HIN0_MYCMM Phenolpthiocerol synthesis type-I polyketide synthase PpsB OS=Mycobacterium marinum (strain ATCC BAA-535 / M) GN=ppsB PE=4 SV=1	41	28	32.9	161.73	37.2256	34.7453	20.4754	23.2153	0.93337	1.69693	1.13382
MMAR_2638	3596	B2HSR0	>tr|B2HSR0|B2HSR0_MYCMM Transcriptional regulatory protein (Probably AcrR-family) OS=Mycobacterium marinum (strain ATCC BAA-535 / M) GN=MMAR_2638 PE=4 SV=1	14	14	57.4	22.754	11.9218	12.3764	7.32521	12.3844	1.03813	1.68957	1.69065
aspS	2524	B2HNA9	>tr|B2HNA9|B2HNA9_MYCMM Aspartate--tRNA ligase OS=Mycobacterium marinum (strain ATCC BAA-535 / M) GN=aspS PE=3 SV=1	21	21	38.4	64.463	16.371	17.085	10.1264	16.9467	1.04361	1.68718	1.67352
gabD1	2455	B2HN15	>tr|B2HN15|B2HN15_MYCMM Succinate-semialdehyde dehydrogenase [NADP+] dependent (SsdH) GabD1 OS=Mycobacterium marinum (strain ATCC BAA-535 / M) GN=gabD1 PE=3 SV=1	11	11	27.9	48.521	10.9293	10.3332	6.14145	10.3312	0.945461	1.68254	1.68222
MMAR_2831	152	B2HDD4	>tr|B2HDD4|B2HDD4_MYCMM Transcriptional regulator OS=Mycobacterium marinum (strain ATCC BAA-535 / M) GN=MMAR_2831 PE=4 SV=1	7	7	41.1	19.863	6.43425	7.78509	4.62956	3.08518	1.20995	1.6816	0.666409
MMAR_0798	3124	B2HQT8	>tr|B2HQT8|B2HQT8_MYCMM Conserved transmembrane protein OS=Mycobacterium marinum (strain ATCC BAA-535 / M) GN=MMAR_0798 PE=4 SV=1	27	27	53.4	47.547	28.2585	40.8045	24.2904	23.2371	1.44398	1.67986	0.956636
MMAR_1521	872	B2HGI6	>tr|B2HGI6|B2HGI6_MYCMM Conserved protein OS=Mycobacterium marinum (strain ATCC BAA-535 / M) GN=MMAR_1521 PE=4 SV=1	6	6	42.3	15.796	5.46465	4.68512	2.80116	5.16016	0.857351	1.67257	1.84215
MMAR_3558	1754	B2HK33	>tr|B2HK33|B2HK33_MYCMM Aminotransferase (Adenosylmethionine-8-amino-7-oxononanoate) BioA OS=Mycobacterium marinum (strain ATCC BAA-535 / M) GN=MMAR_3558 PE=3 SV=1	10	10	29.9	49.049	9.92531	10.3567	6.1942	6.1922	1.04346	1.672	0.999676
embA	2336	B2HMJ1	>tr|B2HMJ1|B2HMJ1_MYCMM Integral membrane indolylacetylinositol arabinosyltransferase EmbA OS=Mycobacterium marinum (strain ATCC BAA-535 / M) GN=embA PE=4 SV=1	22	22	19.7	118.26	24.8133	32.538	19.5026	33.5465	1.31131	1.66839	1.7201
pafA	736	B2HFV4	>sp|B2HFV4|PAFA_MYCMM Pup--protein ligase OS=Mycobacterium marinum (strain ATCC BAA-535 / M) GN=pafA PE=3 SV=1	29	29	61.1	51.288	37.1683	29.0268	17.3988	24.7688	0.780957	1.66832	1.42359
dnaA	1285	B2HI46	>sp|B2HI46|DNAA_MYCMM Chromosomal replication initiator protein DnaA OS=Mycobacterium marinum (strain ATCC BAA-535 / M) GN=dnaA PE=3 SV=1	29	29	39.6	56.618	27.8023	30.9059	18.5298	30.4723	1.11163	1.6679	1.6445
MMAR_1574	1056	B2HH94	>tr|B2HH94|B2HH94_MYCMM Uncharacterized protein OS=Mycobacterium marinum (strain ATCC BAA-535 / M) GN=MMAR_1574 PE=4 SV=1	9	9	71.2	13.381	8.45371	15.0887	9.04811	6.70275	1.78486	1.66761	0.74079
MMAR_3188	918	B2HGR1	>tr|B2HGR1|B2HGR1_MYCMM Conserved protein OS=Mycobacterium marinum (strain ATCC BAA-535 / M) GN=MMAR_3188 PE=3 SV=1	11	11	41.4	28.208	6.46865	10.3098	6.1942	7.73479	1.59381	1.66443	1.24871
MMAR_5455	2622	B2HNQ7	>tr|B2HNQ7|B2HNQ7_MYCMM Conserved hypothetical alanine and proline rich protein OS=Mycobacterium marinum (strain ATCC BAA-535 / M) GN=MMAR_5455 PE=4 SV=1	15	15	23.8	79.25	16.371	16.4863	9.91536	19.109	1.00704	1.6627	1.92721
MMAR_2976	537	B2HEZ6	>tr|B2HEZ6|B2HEZ6_MYCMM Uncharacterized protein OS=Mycobacterium marinum (strain ATCC BAA-535 / M) GN=MMAR_2976 PE=4 SV=1	18	18	36.9	53.278	10.4273	9.27646	5.60232	9.82068	0.889632	1.65583	1.75297
bpoC	3353	B2HRP5	>tr|B2HRP5|B2HRP5_MYCMM Bromoperoxidase BpoC OS=Mycobacterium marinum (strain ATCC BAA-535 / M) GN=bpoC PE=4 SV=1	15	15	42.4	28.555	12.4009	11.3197	6.83884	13.9488	0.91281	1.6552	2.03965
MMAR_0830	3153	B2HQX0	>tr|B2HQX0|B2HQX0_MYCMM Conserved protein OS=Mycobacterium marinum (strain ATCC BAA-535 / M) GN=MMAR_0830 PE=4 SV=1	10	10	24.8	38.795	21.8013	24.2948	14.7032	15.5023	1.11438	1.65235	1.05435
fadA6_3	3658	B2HT03	>tr|B2HT03|B2HT03_MYCMM Acetyl-CoA acetyltransferase FadA6_3 OS=Mycobacterium marinum (strain ATCC BAA-535 / M) GN=fadA6_3 PE=3 SV=1	11	11	40.1	39.904	9.43477	5.60121	3.39304	3.0961	0.593678	1.65079	0.912484
pca	1413	B2HIK4	>tr|B2HIK4|B2HIK4_MYCMM Pyruvate carboxylase OS=Mycobacterium marinum (strain ATCC BAA-535 / M) GN=pca PE=3 SV=1	44	44	39.7	121.02	68.5075	68.0586	41.2788	70.7979	0.993447	1.64875	1.71512
ppsD	1436	B2HIM8	>tr|B2HIM8|B2HIM8_MYCMM Phenolpthiocerol synthesis type-I polyketide synthase PpsD OS=Mycobacterium marinum (strain ATCC BAA-535 / M) GN=ppsD PE=4 SV=1	58	57	32.8	191.55	73.4014	59.5685	36.3623	35.5778	0.811544	1.63819	0.978426
tkt	2753	B2HP99	>tr|B2HP99|B2HP99_MYCMM Transketolase Tkt OS=Mycobacterium marinum (strain ATCC BAA-535 / M) GN=tkt PE=4 SV=1	27	27	52.1	75.139	52.6041	48.6365	29.6933	54.7305	0.924576	1.63796	1.84319
htpG	1728	B2HJZ8	>tr|B2HJZ8|B2HJZ8_MYCMM Chaperone protein HtpG OS=Mycobacterium marinum (strain ATCC BAA-535 / M) GN=htpG PE=3 SV=1	39	39	46.5	72.823	42.6674	55.7994	34.1003	67.6145	1.30778	1.63633	1.98281
kasA	1178	B2HHR6	>tr|B2HHR6|B2HHR6_MYCMM 3-oxoacyl-[acyl-carrier protein] synthase 1 KasA OS=Mycobacterium marinum (strain ATCC BAA-535 / M) GN=kasA PE=3 SV=1	12	12	43	43.651	34.2366	33.0898	20.3055	24.2691	0.966504	1.6296	1.1952
MMAR_2072	2233	B2HM58	>tr|B2HM58|B2HM58_MYCMM Uncharacterized protein OS=Mycobacterium marinum (strain ATCC BAA-535 / M) GN=MMAR_2072 PE=4 SV=1	10	10	26.6	46.537	10.9293	11.8246	7.27246	5.67072	1.08192	1.62594	0.779753
MMAR_1557	900	B2HGM3	>tr|B2HGM3|B2HGM3_MYCMM Conserved hypothetical oxidoreductase OS=Mycobacterium marinum (strain ATCC BAA-535 / M) GN=MMAR_1557 PE=4 SV=1	7	7	27.1	33.492	6.44572	4.63823	2.85391	1.54259	0.719583	1.62522	0.540518
fba	2859	B2HPV3	>tr|B2HPV3|B2HPV3_MYCMM Fructose-bisphosphate aldolase, Fba OS=Mycobacterium marinum (strain ATCC BAA-535 / M) GN=fba PE=4 SV=1	10	10	33.1	36.63	9.94824	11.8949	7.32521	8.26718	1.19568	1.62383	1.12859
MMAR_5087	1542	B2HJ28	>tr|B2HJ28|B2HJ28_MYCMM Conserved membrane protein OS=Mycobacterium marinum (strain ATCC BAA-535 / M) GN=MMAR_5087 PE=4 SV=1	9	9	39.9	27.939	42.6215	46.6168	28.7617	24.2801	1.09374	1.62079	0.844179
pcd	290	B2HDY2	>tr|B2HDY2|B2HDY2_MYCMM Piperideine-6-carboxilic acid dehydrogenase Pcd OS=Mycobacterium marinum (strain ATCC BAA-535 / M) GN=pcd PE=3 SV=1	12	12	23.8	52.794	7.94025	6.19994	3.82666	5.182	0.780825	1.62019	1.35418
MMAR_2331	2927	B2HQ37	>tr|B2HQ37|B2HQ37_MYCMM Uncharacterized protein OS=Mycobacterium marinum (strain ATCC BAA-535 / M) GN=MMAR_2331 PE=4 SV=1	21	21	50.8	29.498	28.2585	31.0466	19.1745	18.0442	1.09867	1.61916	0.941052
mapB	1673	B2HJQ5	>tr|B2HJQ5|B2HJQ5_MYCMM Methionine aminopeptidase OS=Mycobacterium marinum (strain ATCC BAA-535 / M) GN=mapB PE=3 SV=1	8	8	32.3	31.233	5.95518	4.61478	2.85391	3.59574	0.774919	1.617	1.25993
thrA	3066	B2HQL8	>tr|B2HQL8|B2HQL8_MYCMM Homoserine dehydrogenase OS=Mycobacterium marinum (strain ATCC BAA-535 / M) GN=thrA PE=3 SV=1	16	16	38.1	45.74	26.2849	23.6726	14.6504	24.8015	0.900619	1.61583	1.69289
gyrA	1290	B2HI51	>tr|B2HI51|B2HI51_MYCMM DNA gyrase subunit A OS=Mycobacterium marinum (strain ATCC BAA-535 / M) GN=gyrA PE=3 SV=1	42	42	53.2	92.784	49.0901	36.6478	22.7374	35.0454	0.746541	1.61179	1.54131
MMAR_1535	884	B2HGK0	>tr|B2HGK0|B2HGK0_MYCMM Conserved ATPase OS=Mycobacterium marinum (strain ATCC BAA-535 / M) GN=MMAR_1535 PE=3 SV=1	9	9	25.2	44.383	6.93625	6.24683	3.87942	9.77702	0.900607	1.61025	2.52023
MMAR_2779	126	B2HD84	>tr|B2HD84|B2HD84_MYCMM Uncharacterized protein OS=Mycobacterium marinum (strain ATCC BAA-535 / M) GN=MMAR_2779 PE=4 SV=1	5	5	17.1	39.637	14.3974	14.4665	8.99536	8.24535	1.0048	1.60822	0.916622
purC	1029	B2HH58	>sp|B2HH58|PUR7_MYCMM Phosphoribosylaminoimidazole-succinocarboxamide synthase OS=Mycobacterium marinum (strain ATCC BAA-535 / M) GN=purC PE=3 SV=1	16	16	52.9	32.736	6.94771	7.18637	4.4713	4.62777	1.03435	1.60722	1.03499
glcB	3644	B2HSY2	>sp|B2HSY2|MASZ_MYCMM Malate synthase G OS=Mycobacterium marinum (strain ATCC BAA-535 / M) GN=glcB PE=3 SV=1	41	41	45.8	79.478	34.75	54.1908	33.7194	60.4121	1.55945	1.60711	1.79161
MMAR_1663	1114	B2HHI1	>tr|B2HHI1|B2HHI1_MYCMM Uncharacterized protein OS=Mycobacterium marinum (strain ATCC BAA-535 / M) GN=MMAR_1663 PE=4 SV=1	17	17	51.1	36.238	45.1315	44.9847	28	36.1539	0.996748	1.6066	1.29121
hisC	2985	B2HQA3	>sp|B2HQA3|HIS8_MYCMM Histidinol-phosphate aminotransferase OS=Mycobacterium marinum (strain ATCC BAA-535 / M) GN=hisC PE=3 SV=1	15	15	44.8	40.866	9.93677	10.8147	6.73333	12.3626	1.08835	1.60615	1.83602
MMAR_1194	257	B2HDT6	>tr|B2HDT6|B2HDT6_MYCMM Uncharacterized protein OS=Mycobacterium marinum (strain ATCC BAA-535 / M) GN=MMAR_1194 PE=4 SV=1	18	17	27.8	81.283	5.98958	9.75795	6.08869	11.3524	1.62915	1.60264	1.8645
MMAR_3830	2591	B2HNI7	>tr|B2HNI7|B2HNI7_MYCMM ATP-binding component of an ABC transporter OS=Mycobacterium marinum (strain ATCC BAA-535 / M) GN=MMAR_3830 PE=4 SV=1	34	34	47	61.891	64.9936	66.5673	41.5838	53.633	1.02421	1.6008	1.28976
parA	2637	B2HNT3	>tr|B2HNT3|B2HNT3_MYCMM Chromosome partitioning protein ParA OS=Mycobacterium marinum (strain ATCC BAA-535 / M) GN=parA PE=4 SV=1	9	9	23.9	39.852	18.8581	20.6899	12.9275	18.0551	1.09714	1.60045	1.39664
pepN	2579	B2HNH4	>tr|B2HNH4|B2HNH4_MYCMM Aminopeptidase N PepN OS=Mycobacterium marinum (strain ATCC BAA-535 / M) GN=pepN PE=4 SV=1	33	32	37.8	93.982	22.8511	30.3775	19.0162	35.0782	1.32937	1.59745	1.84465
MMAR_1333	493	B2HET5	>tr|B2HET5|B2HET5_MYCMM Iron-regulated short-chain dehydrogenase/reductase OS=Mycobacterium marinum (strain ATCC BAA-535 / M) GN=MMAR_1333 PE=4 SV=1	20	20	50.4	29.911	22.8053	23.6258	14.8087	29.9071	1.03598	1.5954	2.01956
MMAR_0587	2690	B2HP09	>tr|B2HP09|B2HP09_MYCMM Short-chain type dehydrogenase/reductase OS=Mycobacterium marinum (strain ATCC BAA-535 / M) GN=MMAR_0587 PE=4 SV=1	7	7	42.3	25.258	6.44572	7.20982	4.52406	9.28829	1.11854	1.59366	2.05309
hisD	2984	B2HQA2	>tr|B2HQA2|B2HQA2_MYCMM Histidinol dehydrogenase OS=Mycobacterium marinum (strain ATCC BAA-535 / M) GN=hisD PE=3 SV=1	14	14	34.7	46.285	6.45718	8.81842	5.54956	10.82	1.36568	1.58903	1.9497
MMAR_2141	2513	B2HN92	>tr|B2HN92|B2HN92_MYCMM Conserved hypothetical transmembrane protein OS=Mycobacterium marinum (strain ATCC BAA-535 / M) GN=MMAR_2141 PE=4 SV=1	3	3	7.7	27.695	5.95518	6.24683	3.93217	5.14925	1.04897	1.58865	1.30952
MMAR_0968	3517	B2HSG6	>tr|B2HSG6|B2HSG6_MYCMM UPF0336 protein MMAR_0968 OS=Mycobacterium marinum (strain ATCC BAA-535 / M) GN=MMAR_0968 PE=3 SV=1	8	8	59.7	17.347	9.40038	9.82829	6.1942	7.70204	1.04552	1.58669	1.24343
lspA	2954	B2HQ67	>tr|B2HQ67|B2HQ67_MYCMM Lipoprotein signal peptidase OS=Mycobacterium marinum (strain ATCC BAA-535 / M) GN=lspA PE=3 SV=1	6	6	21.9	20.883	11.8989	15.9813	10.0736	8.7559	1.34309	1.58645	0.869191
desA2	3694	B2HT60	>tr|B2HT60|B2HT60_MYCMM Acyl-[acyl-carrier protein] desaturase DesA2 OS=Mycobacterium marinum (strain ATCC BAA-535 / M) GN=desA2 PE=4 SV=1	15	15	58.2	31.348	22.3147	23.2849	14.7032	16.4689	1.04348	1.58367	1.12009
MMAR_0799	3125	B2HQT9	>tr|B2HQT9|B2HQT9_MYCMM Transcriptional regulatory protein OS=Mycobacterium marinum (strain ATCC BAA-535 / M) GN=MMAR_0799 PE=4 SV=1	7	7	51.4	15.134	9.90238	9.87519	6.24695	5.69255	0.997254	1.5808	0.911253
MMAR_4417	156	B2HDE0	>tr|B2HDE0|B2HDE0_MYCMM Conserved hypothetical membrane protein OS=Mycobacterium marinum (strain ATCC BAA-535 / M) GN=MMAR_4417 PE=4 SV=1	4	4	14.3	28.111	9.4577	10.7913	6.83884	7.22423	1.141	1.57794	1.05635
MMAR_4314	3654	B2HSZ9	>tr|B2HSZ9|B2HSZ9_MYCMM Conserved hypothetical membrane protein OS=Mycobacterium marinum (strain ATCC BAA-535 / M) GN=MMAR_4314 PE=4 SV=1	5	5	38.5	19.132	5.45319	6.19994	3.93217	5.67072	1.13694	1.57672	1.44213
MMAR_2660	3610	B2HSS9	>tr|B2HSS9|B2HSS9_MYCMM Conserved hypothetical membrane protein OS=Mycobacterium marinum (strain ATCC BAA-535 / M) GN=MMAR_2660 PE=4 SV=1	24	24	39.8	65.61	28.749	34.5577	21.9229	30.4504	1.20205	1.57633	1.38898
menB	3348	B2HRP0	>tr|B2HRP0|B2HRP0_MYCMM Naphthoate synthase, MenB OS=Mycobacterium marinum (strain ATCC BAA-535 / M) GN=menB PE=4 SV=1	13	13	57.3	33.402	7.43825	2.54814	1.61739	3.60666	0.342572	1.57546	2.22992
MMAR_4180	3285	B2HRF6	>tr|B2HRF6|B2HRF6_MYCMM Oxidoreductase OS=Mycobacterium marinum (strain ATCC BAA-535 / M) GN=MMAR_4180 PE=4 SV=1	14	14	28.6	41.788	5.93225	9.75795	6.1942	9.28829	1.6449	1.57534	1.49951
dnaJ2	2249	B2HM79	>tr|B2HM79|B2HM79_MYCMM Chaperone protein DnaJ OS=Mycobacterium marinum (strain ATCC BAA-535 / M) GN=dnaJ2 PE=3 SV=1	21	21	59.5	40.011	30.2435	34.5343	21.9229	35.1109	1.14187	1.57526	1.60157
fabG1	2785	B2HPD4	>tr|B2HPD4|B2HPD4_MYCMM 3-oxoacyl-[acyl-carrier protein] reductase, FabG1 OS=Mycobacterium marinum (strain ATCC BAA-535 / M) GN=fabG1 PE=3 SV=1	14	13	48.6	26.669	28.2814	18.506	11.7965	21.1949	0.654354	1.56877	1.79671
MMAR_3627	1996	B2HL66	>tr|B2HL66|B2HL66_MYCMM Uncharacterized protein OS=Mycobacterium marinum (strain ATCC BAA-535 / M) GN=MMAR_3627 PE=4 SV=1	8	8	54.4	16.878	5.95518	6.22339	3.98493	3.08518	1.04504	1.56173	0.774213
lipD	150	B2HDD1	>tr|B2HDD1|B2HDD1_MYCMM Lipase LipD OS=Mycobacterium marinum (strain ATCC BAA-535 / M) GN=lipD PE=4 SV=1	18	18	42.2	45.017	14.386	16.6035	10.6655	19.6195	1.15415	1.55675	1.83953
proA	2305	B2HME9	>sp|B2HME9|PROA_MYCMM Gamma-glutamyl phosphate reductase OS=Mycobacterium marinum (strain ATCC BAA-535 / M) GN=proA PE=3 SV=1	16	16	39.5	44.565	8.44224	8.77152	5.65507	8.7559	1.039	1.55109	1.54833
MMAR_4944	1203	B2HHU8	>tr|B2HHU8|B2HHU8_MYCMM Conserved hypothetical oxidoreductase OS=Mycobacterium marinum (strain ATCC BAA-535 / M) GN=MMAR_4944 PE=4 SV=1	10	10	26.3	41.902	6.94771	8.77152	5.65507	4.11721	1.2625	1.55109	0.728057
gyrB	1289	B2HI50	>tr|B2HI50|B2HI50_MYCMM DNA gyrase subunit B OS=Mycobacterium marinum (strain ATCC BAA-535 / M) GN=gyrB PE=3 SV=1	29	29	38.7	76.154	39.6668	36.1194	23.3293	25.779	0.91057	1.54824	1.10501
MMAR_1974	1958	B2HL03	>tr|B2HL03|B2HL03_MYCMM Glycosyl transferase OS=Mycobacterium marinum (strain ATCC BAA-535 / M) GN=MMAR_1974 PE=4 SV=1	4	4	13.1	39.811	7.91731	6.15305	3.98493	5.16016	0.777163	1.54408	1.29492
grcC1	3362	B2HRQ6	>tr|B2HRQ6|B2HRQ6_MYCMM Polyprenyl diphosphate synthetase, GrcC1 OS=Mycobacterium marinum (strain ATCC BAA-535 / M) GN=grcC1 PE=3 SV=1	9	9	25.4	35.715	8.89838	6.1296	3.98493	5.67072	0.688844	1.5382	1.42304
MMAR_4619	428	B2HEJ7	>tr|B2HEJ7|B2HEJ7_MYCMM Conserved protein OS=Mycobacterium marinum (strain ATCC BAA-535 / M) GN=MMAR_4619 PE=4 SV=1	7	7	50	15.851	6.92478	7.78509	5.06319	6.1922	1.12424	1.53759	1.22298
ppk	1398	B2HII5	>sp|B2HII5|PPK_MYCMM Polyphosphate kinase OS=Mycobacterium marinum (strain ATCC BAA-535 / M) GN=ppk PE=3 SV=1	29	29	39.8	82.319	25.8058	30.4713	19.8307	27.3325	1.18079	1.53657	1.37829
accD6	1180	B2HHR8	>tr|B2HHR8|B2HHR8_MYCMM Acetyl/propionyl-CoA carboxylase (Beta subunit) AccD6 OS=Mycobacterium marinum (strain ATCC BAA-535 / M) GN=accD6 PE=4 SV=1	34	34	64.5	50.059	71.4851	61.4944	40.0719	40.3039	0.860241	1.5346	1.00579
MMAR_1423	695	B2HFN6	>tr|B2HFN6|B2HFN6_MYCMM Anchored-membrane serine/threonine-protein kinase OS=Mycobacterium marinum (strain ATCC BAA-535 / M) GN=MMAR_1423 PE=4 SV=1	14	14	32.1	68.679	22.3033	23.7899	15.5704	20.6625	1.06665	1.52789	1.32703
ilvN	1379	B2HIG6	>tr|B2HIG6|B2HIG6_MYCMM Acetolactate synthase (Small subunit) IlvN OS=Mycobacterium marinum (strain ATCC BAA-535 / M) GN=ilvN PE=4 SV=1	16	16	84	18.257	20.3297	24.3886	15.9925	15.4259	1.19965	1.52501	0.964574
glyA2	1851	B2HKH1	>tr|B2HKH1|B2HKH1_MYCMM Serine hydroxymethyltransferase OS=Mycobacterium marinum (strain ATCC BAA-535 / M) GN=glyA2 PE=3 SV=1	10	10	23.3	45.509	7.95171	5.16662	3.39304	2.57462	0.649749	1.52271	0.758795
relA	2502	B2HN76	>tr|B2HN76|B2HN76_MYCMM GTP pyrophosphokinase RelA OS=Mycobacterium marinum (strain ATCC BAA-535 / M) GN=relA PE=3 SV=1	36	36	48.3	87.058	30.2665	30.9762	20.3698	37.631	1.02345	1.52069	1.84739
iipA	2780	B2HPC9	>tr|B2HPC9|B2HPC9_MYCMM Mycobacterial invasion and intracellular persistence protein, IipA OS=Mycobacterium marinum (strain ATCC BAA-535 / M) GN=iipA PE=4 SV=1	13	13	23.2	49.511	9.43477	12.9283	8.50898	5.65981	1.37028	1.51937	0.665157
MMAR_3616	1989	B2HL55	>tr|B2HL55|B2HL55_MYCMM Conserved protein OS=Mycobacterium marinum (strain ATCC BAA-535 / M) GN=MMAR_3616 PE=4 SV=1	20	20	47.1	54.534	8.43078	9.32335	6.14145	8.76682	1.10587	1.5181	1.42748
ctpF	3323	B2HRK6	>tr|B2HRK6|B2HRK6_MYCMM Metal cation-transporting p-type ATPase F, CtpF OS=Mycobacterium marinum (strain ATCC BAA-535 / M) GN=ctpF PE=3 SV=1	20	20	25	95.044	19.8162	22.7331	14.9785	26.3005	1.1472	1.51771	1.75588
ctpH	3074	B2HQN0	>tr|B2HQN0|B2HQN0_MYCMM Metal cation transporting p-type ATPase CtpH OS=Mycobacterium marinum (strain ATCC BAA-535 / M) GN=ctpH PE=4 SV=1	48	48	36.8	159.46	62.0848	56.9266	37.5577	50.5914	0.916917	1.51571	1.34703
dnaG	2010	B2HL90	>tr|B2HL90|B2HL90_MYCMM DNA primase OS=Mycobacterium marinum (strain ATCC BAA-535 / M) GN=dnaG PE=3 SV=1	18	17	32.5	71.19	9.90238	9.27646	6.14145	6.72459	0.936791	1.51047	1.09495
fadA4	3040	B2HQJ0	>tr|B2HQJ0|B2HQJ0_MYCMM Acetyl-CoA acetyltransferase FadA4 OS=Mycobacterium marinum (strain ATCC BAA-535 / M) GN=fadA4 PE=3 SV=1	18	18	43	40.521	16.3825	12.9283	8.56174	15.9801	0.789151	1.51	1.86646
ppsE	1435	B2HIM7	>tr|B2HIM7|B2HIM7_MYCMM Phenolpthiocerol synthesis type-I polyketide synthase PpsE OS=Mycobacterium marinum (strain ATCC BAA-535 / M) GN=ppsE PE=4 SV=1	52	52	35.4	157.97	71.9183	66.7783	44.3322	43.3126	0.928529	1.50632	0.977002
serS	2360	B2HMM1	>sp|B2HMM1|SYS_MYCMM Serine--tRNA ligase OS=Mycobacterium marinum (strain ATCC BAA-535 / M) GN=serS PE=3 SV=1	14	14	38.2	45.223	7.92878	9.32335	6.1942	8.23443	1.17589	1.50517	1.32938
gpdA2	1399	B2HII7	>tr|B2HII7|B2HII7_MYCMM Glycerol-3-phosphate dehydrogenase [NAD(P)+] OS=Mycobacterium marinum (strain ATCC BAA-535 / M) GN=gpdA2 PE=3 SV=1	10	10	27.8	34.15	7.42678	5.09628	3.39304	6.69184	0.686202	1.50198	1.97222
MMAR_3010	557	B2HF29	>tr|B2HF29|B2HF29_MYCMM Conserved membrane protein OS=Mycobacterium marinum (strain ATCC BAA-535 / M) GN=MMAR_3010 PE=4 SV=1	5	5	12.5	34.405	5.95518	5.09628	3.39304	5.68164	0.855771	1.50198	1.6745
cyp147G1	355	B2HE89	>tr|B2HE89|B2HE89_MYCMM Cytochrome P450 147G1 Cyp147G1 OS=Mycobacterium marinum (strain ATCC BAA-535 / M) GN=cyp147G1 PE=3 SV=1	11	11	30.1	46.671	10.4273	9.29991	6.1942	9.31013	0.89188	1.50139	1.50304
mmpL4_5	911	B2HGQ1	>tr|B2HGQ1|B2HGQ1_MYCMM Conserved transmembrane transport protein MmpL4_5 OS=Mycobacterium marinum (strain ATCC BAA-535 / M) GN=mmpL4_5 PE=4 SV=1	18	18	23.4	103.37	11.8989	13.985	9.32347	10.8636	1.17532	1.49998	1.16519
pyrE	2845	B2HPT3	>tr|B2HPT3|B2HPT3_MYCMM Orotate phosphoribosyltransferase OS=Mycobacterium marinum (strain ATCC BAA-535 / M) GN=pyrE PE=3 SV=1	9	9	35.8	18.819	6.45718	6.70488	4.4713	7.72387	1.03836	1.49954	1.72743
cfp6	1377	B2HIG3	>tr|B2HIG3|B2HIG3_MYCMM Low molecular weight protein antigen 6, Cfp6 OS=Mycobacterium marinum (strain ATCC BAA-535 / M) GN=cfp6 PE=4 SV=1	3	3	17.6	13.375	5.95518	5.16662	3.4458	4.63869	0.867583	1.4994	1.34619
MMAR_3034	574	B2HF53	>tr|B2HF53|B2HF53_MYCMM Conserved transmembrane protein OS=Mycobacterium marinum (strain ATCC BAA-535 / M) GN=MMAR_3034 PE=4 SV=1	16	16	27	58.088	12.9029	15.9813	10.6655	18.0879	1.23859	1.49841	1.69592
trpD	954	B2HGW0	>sp|B2HGW0|TRPD_MYCMM Anthranilate phosphoribosyltransferase OS=Mycobacterium marinum (strain ATCC BAA-535 / M) GN=trpD PE=3 SV=1	6	6	23.4	37.808	5.94372	6.65798	4.4713	5.65981	1.12017	1.48905	1.26581
MMAR_1428	697	B2HFP1	>tr|B2HFP1|B2HFP1_MYCMM Uncharacterized protein OS=Mycobacterium marinum (strain ATCC BAA-535 / M) GN=MMAR_1428 PE=4 SV=1	8	8	69.9	12.857	160.105	171.261	115.152	99.5093	1.06968	1.48726	0.864153
mpa	744	B2HFW2	>sp|B2HFW2|ARC_MYCMM Proteasome-associated ATPase OS=Mycobacterium marinum (strain ATCC BAA-535 / M) GN=mpa PE=3 SV=1	28	27	47.1	67.571	37.1568	39.3601	26.4997	30.4613	1.0593	1.4853	1.1495
MMAR_5445	2394	B2HMT3	>tr|B2HMT3|B2HMT3_MYCMM Conserved hypothetical transmembrane protein OS=Mycobacterium marinum (strain ATCC BAA-535 / M) GN=MMAR_5445 PE=4 SV=1	33	33	44	80.844	52.0792	47.0748	31.7327	28.9187	0.903908	1.48348	0.911322
pbpB	929	B2HGS3	>tr|B2HGS3|B2HGS3_MYCMM Penicillin-binding membrane protein PbpB OS=Mycobacterium marinum (strain ATCC BAA-535 / M) GN=pbpB PE=4 SV=1	20	20	29.1	74.191	24.3571	21.6294	14.5977	13.9379	0.888013	1.4817	0.954803
MMAR_1939	1936	B2HKW7	>tr|B2HKW7|B2HKW7_MYCMM Conserved hypothetical secreted protein OS=Mycobacterium marinum (strain ATCC BAA-535 / M) GN=MMAR_1939 PE=4 SV=1	8	8	36.4	17.227	8.45371	6.77522	4.57681	3.59574	0.801449	1.48034	0.785643
atsD_2	305	B2HE00	>tr|B2HE00|B2HE00_MYCMM Arylsulfatase AtsD_2 OS=Mycobacterium marinum (strain ATCC BAA-535 / M) GN=atsD_2 PE=4 SV=1	16	15	21.5	85.357	7.42678	8.29003	5.60232	9.27738	1.11623	1.47975	1.65599
MMAR_1840	1671	B2HJQ3	>tr|B2HJQ3|B2HJQ3_MYCMM Penicillin-binding lipoprotein OS=Mycobacterium marinum (strain ATCC BAA-535 / M) GN=MMAR_1840 PE=4 SV=1	7	7	14.9	63.231	6.93625	8.29003	5.60232	3.0961	1.19517	1.47975	0.552646
MMAR_4541	384	B2HEC2	>tr|B2HEC2|B2HEC2_MYCMM Magnesium chelatase OS=Mycobacterium marinum (strain ATCC BAA-535 / M) GN=MMAR_4541 PE=4 SV=1	13	13	29.2	50.045	5.47612	8.29003	5.60232	7.24606	1.51385	1.47975	1.2934
MMAR_0871	3328	B2HRL6	>tr|B2HRL6|B2HRL6_MYCMM Uncharacterized protein OS=Mycobacterium marinum (strain ATCC BAA-535 / M) GN=MMAR_0871 PE=4 SV=1	7	7	55.4	22.289	10.4044	12.4937	8.45623	9.80977	1.20081	1.47745	1.16006
MMAR_2995	553	B2HF15	>tr|B2HF15|B2HF15_MYCMM Conserved hypothetical transmembrane protein OS=Mycobacterium marinum (strain ATCC BAA-535 / M) GN=MMAR_2995 PE=4 SV=1	7	7	20.7	30.869	6.45718	9.22957	6.24695	11.3414	1.42935	1.47745	1.81552
MMAR_4849	981	B2HGZ8	>tr|B2HGZ8|B2HGZ8_MYCMM Uncharacterized protein OS=Mycobacterium marinum (strain ATCC BAA-535 / M) GN=MMAR_4849 PE=4 SV=1	18	18	65.9	29.712	43.6713	36.1663	24.5014	43.258	0.828147	1.47609	1.76553
MMAR_2014	2185	B2HM00	>tr|B2HM00|B2HM00_MYCMM Conserved hypothetical secreted protein OS=Mycobacterium marinum (strain ATCC BAA-535 / M) GN=MMAR_2014 PE=4 SV=1	10	10	35.5	22.803	27.3003	29.896	20.3055	25.8117	1.09508	1.47231	1.27117
MMAR_0496	2460	B2HN21	>tr|B2HN21|B2HN21_MYCMM Conserved transmembrane protein OS=Mycobacterium marinum (strain ATCC BAA-535 / M) GN=MMAR_0496 PE=4 SV=1	31	31	29.2	145.97	29.2969	29.896	20.3171	38.1634	1.02045	1.47147	1.87839
fmu	2720	B2HP61	>tr|B2HP61|B2HP61_MYCMM Fmu protein OS=Mycobacterium marinum (strain ATCC BAA-535 / M) GN=fmu PE=4 SV=1	19	19	43.9	51.387	17.8426	16.5332	11.2574	10.2876	0.926611	1.46865	0.913851
MMAR_0921	3372	B2HRR6	>tr|B2HRR6|B2HRR6_MYCMM ABC-type transporter OS=Mycobacterium marinum (strain ATCC BAA-535 / M) GN=MMAR_0921 PE=4 SV=1	14	14	19	82.832	7.44971	9.80485	6.68058	7.75662	1.31614	1.46766	1.16107
sigA	2182	B2HLZ7	>tr|B2HLZ7|B2HLZ7_MYCMM RNA polymerase sigma factor OS=Mycobacterium marinum (strain ATCC BAA-535 / M) GN=sigA PE=3 SV=1	29	27	44.9	54.702	69.4657	59.334	40.4527	38.7394	0.854149	1.46675	0.957647
MMAR_4429	158	B2HDF2	>tr|B2HDF2|B2HDF2_MYCMM Conserved transmembrane transport protein, MmpL OS=Mycobacterium marinum (strain ATCC BAA-535 / M) GN=MMAR_4429 PE=4 SV=1	22	18	31.7	102.26	17.3636	15.5467	10.6127	15.5023	0.895366	1.46491	1.46073
mtrA	475	B2HEQ0	>tr|B2HEQ0|B2HEQ0_MYCMM Two-component sensory transduction transcriptional regulatory protein MtrA OS=Mycobacterium marinum (strain ATCC BAA-535 / M) GN=mtrA PE=4 SV=1	11	11	45.8	24.918	22.8282	19.1516	13.0858	16.5125	0.838947	1.46354	1.26187
leuB	1384	B2HIH1	>sp|B2HIH1|LEU3_MYCMM 3-isopropylmalate dehydrogenase OS=Mycobacterium marinum (strain ATCC BAA-535 / M) GN=leuB PE=3 SV=1	13	13	27.1	36.046	13.884	12.353	8.45623	8.7559	0.88973	1.46081	1.03544
MMAR_2147	2516	B2HN98	>tr|B2HN98|B2HN98_MYCMM Metal cation-transporting p-type ATPase C OS=Mycobacterium marinum (strain ATCC BAA-535 / M) GN=MMAR_2147 PE=3 SV=1	25	19	31.6	76.369	25.8058	23.2849	15.9513	13.927	0.902314	1.45975	0.873094
yfiH	919	B2HGR2	>tr|B2HGR2|B2HGR2_MYCMM Conserved membrane protein YfiH OS=Mycobacterium marinum (strain ATCC BAA-535 / M) GN=yfiH PE=4 SV=1	12	12	47.7	27.201	6.93625	6.75177	4.62956	3.61757	0.973404	1.4584	0.781407
qor	2758	B2HPA4	>tr|B2HPA4|B2HPA4_MYCMM Quinone reductase Qor OS=Mycobacterium marinum (strain ATCC BAA-535 / M) GN=qor PE=4 SV=1	8	8	27.4	34.424	7.96318	5.64811	3.87942	5.16016	0.709278	1.45592	1.33014
MMAR_0086	1589	B2HJ88	>tr|B2HJ88|B2HJ88_MYCMM Hydrolase OS=Mycobacterium marinum (strain ATCC BAA-535 / M) GN=MMAR_0086 PE=4 SV=1	5	5	15.4	27.625	6.94771	5.64811	3.87942	5.14925	0.812945	1.45592	1.32732
porB	2567	B2HNF9	>tr|B2HNF9|B2HNF9_MYCMM Pyruvate:ferredoxin oxidoreductase PorB, beta subunit OS=Mycobacterium marinum (strain ATCC BAA-535 / M) GN=porB PE=4 SV=1	18	18	44.4	39.021	41.1614	30.3306	20.8446	21.1294	0.736871	1.45508	1.01366
cydD	3168	B2HQY8	>tr|B2HQY8|B2HQY8_MYCMM Cytochrome transmembrane ATP-binding protein ABC transporter CydD OS=Mycobacterium marinum (strain ATCC BAA-535 / M) GN=cydD PE=3 SV=1	10	10	23.7	55.676	7.95171	8.81842	6.08869	8.24535	1.109	1.44833	1.35421
MMAR_3477	1695	B2HJV4	>tr|B2HJV4|B2HJV4_MYCMM Conserved hypothetical membrane protein OS=Mycobacterium marinum (strain ATCC BAA-535 / M) GN=MMAR_3477 PE=4 SV=1	12	11	33.9	31.877	15.39	21.2183	14.6504	18.5329	1.37871	1.44831	1.26501
MMAR_2213	2718	B2HP58	>tr|B2HP58|B2HP58_MYCMM Transcriptional regulatory protein OS=Mycobacterium marinum (strain ATCC BAA-535 / M) GN=MMAR_2213 PE=4 SV=1	9	9	40	17.342	6.93625	4.13329	2.85391	4.1063	0.595897	1.44829	1.43883
gabT	2496	B2HN70	>tr|B2HN70|B2HN70_MYCMM 4-aminobutyrate aminotransferase GabT OS=Mycobacterium marinum (strain ATCC BAA-535 / M) GN=gabT PE=1 SV=1	18	18	42.6	47.209	6.44572	9.80485	6.78608	11.8738	1.52114	1.44485	1.74973
purA	2868	B2HPW4	>sp|B2HPW4|PURA_MYCMM Adenylosuccinate synthetase OS=Mycobacterium marinum (strain ATCC BAA-535 / M) GN=purA PE=3 SV=1	11	11	25.5	46.69	5.94372	7.23326	5.01043	9.27738	1.21696	1.44364	1.85161
MMAR_5223	1827	B2HKD1	>tr|B2HKD1|B2HKD1_MYCMM Drug-transport transmembrane ATP-binding protein ABC transporter OS=Mycobacterium marinum (strain ATCC BAA-535 / M) GN=MMAR_5223 PE=3 SV=1	34	34	33.8	129.59	20.3755	33.6885	23.382	33.5574	1.65338	1.44079	1.43518
MMAR_1577	1059	B2HH97	>tr|B2HH97|B2HH97_MYCMM Hydrolase OS=Mycobacterium marinum (strain ATCC BAA-535 / M) GN=MMAR_1577 PE=4 SV=1	34	34	56.9	66.858	64.4342	58.876	40.8864	26.3332	0.913737	1.43999	0.644058
pheT	3194	B2HR21	>tr|B2HR21|B2HR21_MYCMM Phenylalanine--tRNA ligase beta subunit OS=Mycobacterium marinum (strain ATCC BAA-535 / M) GN=pheT PE=3 SV=1	23	23	27.4	88.039	14.9109	14.9715	10.4017	20.1519	1.00406	1.43932	1.93736
MMAR_2075	2235	B2HM61	>tr|B2HM61|B2HM61_MYCMM Conserved transmembrane alanine and leucine rich protein OS=Mycobacterium marinum (strain ATCC BAA-535 / M) GN=MMAR_2075 PE=4 SV=1	5	5	12.7	43.234	14.3974	12.8579	8.94261	16.5125	0.893071	1.43783	1.8465
dacC	256	B2HDT4	>tr|B2HDT4|B2HDT4_MYCMM Penicillin-binding protein DacC OS=Mycobacterium marinum (strain ATCC BAA-535 / M) GN=dacC PE=3 SV=1	11	11	28.9	42.795	20.3526	21.1245	14.7032	16.002	1.03793	1.43673	1.08833
rhlE	504	B2HEU8	>tr|B2HEU8|B2HEU8_MYCMM ATP-dependent RNA helicase RhlE OS=Mycobacterium marinum (strain ATCC BAA-535 / M) GN=rhlE PE=3 SV=1	20	20	47	55.388	59.506	41.2391	28.709	35.0673	0.693025	1.43645	1.22147
trpC	3159	B2HQX7	>sp|B2HQX7|TRPC_MYCMM Indole-3-glycerol phosphate synthase OS=Mycobacterium marinum (strain ATCC BAA-535 / M) GN=trpC PE=3 SV=1	19	19	54.4	28.115	27.3233	24.2714	16.9125	23.7477	0.888304	1.43512	1.40415
MMAR_3818	2580	B2HNH5	>tr|B2HNH5|B2HNH5_MYCMM Conserved protein OS=Mycobacterium marinum (strain ATCC BAA-535 / M) GN=MMAR_3818 PE=4 SV=1	6	6	38.3	17.167	5.49905	18.8577	13.1913	9.24463	3.42927	1.42956	0.700813
fadA3	3711	B2HT79	>tr|B2HT79|B2HT79_MYCMM Beta-ketoacyl CoA thiolase FadA3 OS=Mycobacterium marinum (strain ATCC BAA-535 / M) GN=fadA3 PE=3 SV=1	21	21	60.2	42.912	19.3372	21.148	14.8087	18.0551	1.09364	1.42808	1.21922
MMAR_4437	164	B2HDG0	>tr|B2HDG0|B2HDG0_MYCMM Conserved hypothetical membrane protein OS=Mycobacterium marinum (strain ATCC BAA-535 / M) GN=MMAR_4437 PE=4 SV=1	9	9	49.6	24.768	19.3257	20.185	14.1641	13.9488	1.04446	1.42508	0.984804
MMAR_5168	1783	B2HK77	>tr|B2HK77|B2HK77_MYCMM Anion transporter ATPase OS=Mycobacterium marinum (strain ATCC BAA-535 / M) GN=MMAR_5168 PE=4 SV=1	14	14	32.4	35.875	22.3491	23.9775	16.9125	25.2793	1.07286	1.41774	1.49472
serC	604	B2HF89	>tr|B2HF89|B2HF89_MYCMM Phosphoserine aminotransferase OS=Mycobacterium marinum (strain ATCC BAA-535 / M) GN=serC PE=3 SV=1	9	9	25.8	39.957	9.4577	5.64811	3.98493	6.1922	0.597196	1.41737	1.5539
MMAR_2046	2215	B2HM31	>tr|B2HM31|B2HM31_MYCMM Uncharacterized protein OS=Mycobacterium marinum (strain ATCC BAA-535 / M) GN=MMAR_2046 PE=4 SV=1	11	11	35.5	38.425	6.93625	7.16292	5.06319	8.25626	1.03268	1.41471	1.63065
mtr	1683	B2HJT8	>tr|B2HJT8|B2HJT8_MYCMM NADPH-dependent mycothiol reductase Mtr OS=Mycobacterium marinum (strain ATCC BAA-535 / M) GN=mtr PE=4 SV=1	13	13	33.3	49.503	10.4158	10.2863	7.27246	16.4907	0.987567	1.41442	2.26755
proC	3150	B2HQW6	>tr|B2HQW6|B2HQW6_MYCMM Pyrroline-5-carboxylate reductase OS=Mycobacterium marinum (strain ATCC BAA-535 / M) GN=proC PE=3 SV=1	11	11	29.9	30.063	8.43078	7.23326	5.11594	10.8091	0.857959	1.41387	2.11282
MMAR_0062	1334	B2HIA7	>tr|B2HIA7|B2HIA7_MYCMM Transcriptional regulatory protein (Probably GntR-family) OS=Mycobacterium marinum (strain ATCC BAA-535 / M) GN=MMAR_0062 PE=4 SV=1	13	13	42.9	28.495	10.9293	11.8715	8.40348	5.16016	1.08621	1.41269	0.614051
fadD11_1	2232	B2HM57	>tr|B2HM57|B2HM57_MYCMM Long-chain-fatty-acid-CoA ligase, FadD11_1 OS=Mycobacterium marinum (strain ATCC BAA-535 / M) GN=fadD11_1 PE=4 SV=1	26	26	36.1	67.331	30.2894	27.9466	19.8191	31.993	0.922654	1.41008	1.61425
fixA	1360	B2HIE0	>tr|B2HIE0|B2HIE0_MYCMM Electron transfer flavoprotein (Beta-subunit) FixA OS=Mycobacterium marinum (strain ATCC BAA-535 / M) GN=fixA PE=4 SV=1	17	17	54.8	27.776	32.2859	37.8218	26.8806	44.8661	1.17146	1.40703	1.66909
ribBA	2726	B2HP67	>sp|B2HP67|RIBBA_MYCMM Riboflavin biosynthesis protein RibBA OS=Mycobacterium marinum (strain ATCC BAA-535 / M) GN=ribBA PE=3 SV=1	16	16	43.5	46.04	13.3934	13.4098	9.53449	15.4696	1.00122	1.40645	1.62249
MMAR_3056	715	B2HFS9	>tr|B2HFS9|B2HFS9_MYCMM Conserved protein OS=Mycobacterium marinum (strain ATCC BAA-535 / M) GN=MMAR_3056 PE=4 SV=1	10	10	68.4	14.916	6.93625	11.9653	8.50898	17.0231	1.72504	1.40619	2.0006
murF	927	B2HGS0	>tr|B2HGS0|B2HGS0_MYCMM UDP-N-acetylmuramoyl-tripeptide--D-alanyl-D-alanine ligase OS=Mycobacterium marinum (strain ATCC BAA-535 / M) GN=murF PE=3 SV=1	7	7	19.4	53.037	6.44572	3.09997	2.20927	2.06407	0.480935	1.40316	0.934273
MMAR_1187	252	B2HDS9	>tr|B2HDS9|B2HDS9_MYCMM Conserved membrane protein OS=Mycobacterium marinum (strain ATCC BAA-535 / M) GN=MMAR_1187 PE=4 SV=1	9	9	33.8	29.155	29.2625	22.0406	15.7287	22.1287	0.753204	1.4013	1.4069
trcR	171	B2HDH8	>tr|B2HDH8|B2HDH8_MYCMM Two-component transcriptional regulator TrcR OS=Mycobacterium marinum (strain ATCC BAA-535 / M) GN=trcR PE=4 SV=1	9	9	28.7	28.654	13.382	10.3332	7.37797	5.16016	0.772176	1.40055	0.699402
MMAR_2496	3221	B2HR61	>tr|B2HR61|B2HR61_MYCMM Conserved protein OS=Mycobacterium marinum (strain ATCC BAA-535 / M) GN=MMAR_2496 PE=4 SV=1	12	12	47.3	29.494	11.8874	9.3468	6.68058	5.65981	0.786276	1.3991	0.847203
MMAR_5204	1809	B2HKB2	>tr|B2HKB2|B2HKB2_MYCMM Conserved hypothetical membrane protein OS=Mycobacterium marinum (strain ATCC BAA-535 / M) GN=MMAR_5204 PE=4 SV=1	7	7	25.5	35.068	12.4124	11.8715	8.50898	14.4266	0.956425	1.39517	1.69546
rfbE	2087	B2HLK8	>tr|B2HLK8|B2HLK8_MYCMM O-antigen/lipopolysaccharide transport ATP-binding protein ABC transporter RfbE OS=Mycobacterium marinum (strain ATCC BAA-535 / M) GN=rfbE PE=4 SV=1	19	19	48.2	30.62	25.8173	29.9898	21.542	32.5145	1.16162	1.39215	1.50935
fadD25	2937	B2HQ47	>tr|B2HQ47|B2HQ47_MYCMM Fatty acyl-AMP ligase FadD25 OS=Mycobacterium marinum (strain ATCC BAA-535 / M) GN=fadD25 PE=4 SV=1	37	35	50.4	63.12	53.0947	52.1945	37.4933	32.5363	0.983047	1.3921	0.86779
MMAR_4172	3277	B2HRE8	>tr|B2HRE8|B2HRE8_MYCMM Uncharacterized protein OS=Mycobacterium marinum (strain ATCC BAA-535 / M) GN=MMAR_4172 PE=4 SV=1	7	7	34.9	21.686	6.93625	6.22339	4.4713	3.60666	0.897226	1.39185	0.806623
folD	242	B2HDR8	>sp|B2HDR8|FOLD_MYCMM Bifunctional protein FolD OS=Mycobacterium marinum (strain ATCC BAA-535 / M) GN=folD PE=3 SV=1	16	16	45.9	29.727	12.3665	10.1926	7.32521	8.25626	0.824206	1.39143	1.1271
lsr2	1554	B2HJ42	>tr|B2HJ42|B2HJ42_MYCMM Iron-regulated Lsr2 protein OS=Mycobacterium marinum (strain ATCC BAA-535 / M) GN=lsr2 PE=4 SV=1	8	8	42.5	12.065	13.9069	22.991	16.5316	8.72316	1.65321	1.39073	0.527666
groEL2	3091	B2HQP9	>tr|B2HQP9|B2HQP9_MYCMM 60 kDa chaperonin OS=Mycobacterium marinum (strain ATCC BAA-535 / M) GN=groEL2 PE=3 SV=1	59	57	70.4	56.53	259.028	228.541	165.14	189.318	0.882304	1.38393	1.14641
MMAR_5137	1582	B2HJ78	>tr|B2HJ78|B2HJ78_MYCMM Adenylate cyclase OS=Mycobacterium marinum (strain ATCC BAA-535 / M) GN=MMAR_5137 PE=4 SV=1	15	14	29.3	56.674	25.3153	30.9997	22.4093	28.9187	1.22455	1.38334	1.29048
aroK	2539	B2HNC7	>sp|B2HNC7|AROK_MYCMM Shikimate kinase OS=Mycobacterium marinum (strain ATCC BAA-535 / M) GN=aroK PE=3 SV=1	7	7	61.4	19.347	5.45319	6.24683	4.52406	2.55279	1.14554	1.3808	0.564271
MMAR_4354	3678	B2HT40	>tr|B2HT40|B2HT40_MYCMM Conserved hypothetical transmembrane protein OS=Mycobacterium marinum (strain ATCC BAA-535 / M) GN=MMAR_4354 PE=4 SV=1	17	17	45.9	45.167	63.0773	67.6006	49.0145	42.813	1.07171	1.3792	0.873476
MMAR_3232	951	B2HGV5	>tr|B2HGV5|B2HGV5_MYCMM Conserved hypothetical glycosyltransferase OS=Mycobacterium marinum (strain ATCC BAA-535 / M) GN=MMAR_3232 PE=4 SV=1	14	14	44.4	41.68	11.4313	15.453	11.2046	8.77774	1.35181	1.37916	0.783402
gdh	2590	B2HNI6	>tr|B2HNI6|B2HNI6_MYCMM NAD-dependent glutamate dehydrogenase Gdh OS=Mycobacterium marinum (strain ATCC BAA-535 / M) GN=gdh PE=4 SV=1	62	62	41.6	176.52	48.5996	47.6032	34.5339	55.7079	0.979498	1.37845	1.61314
MMAR_2267	2766	B2HPB2	>tr|B2HPB2|B2HPB2_MYCMM Conserved protein OS=Mycobacterium marinum (strain ATCC BAA-535 / M) GN=MMAR_2267 PE=4 SV=1	13	13	47.9	42.589	11.3969	10.9085	7.9171	8.76682	0.957147	1.37784	1.10733
lppL	763	B2HFY9	>tr|B2HFY9|B2HFY9_MYCMM Conserved lipoprotein LppL OS=Mycobacterium marinum (strain ATCC BAA-535 / M) GN=lppL PE=4 SV=1	10	10	34.3	36.465	14.3974	23.9775	17.4516	21.173	1.6654	1.37394	1.21324
MMAR_4094	3058	B2HQK9	>tr|B2HQK9|B2HQK9_MYCMM Conserved hypothetical membrane protein OS=Mycobacterium marinum (strain ATCC BAA-535 / M) GN=MMAR_4094 PE=4 SV=1	8	8	34.9	17.328	17.3636	20.6665	15.0841	17.5446	1.19022	1.37009	1.16312
hflX	1968	B2HL17	>tr|B2HL17|B2HL17_MYCMM GTPase HflX OS=Mycobacterium marinum (strain ATCC BAA-535 / M) GN=hflX PE=3 SV=1	24	24	49.4	53.636	12.8685	36.6947	26.8278	56.2076	2.85151	1.36779	2.09512
MMAR_0775	3107	B2HQR5	>tr|B2HQR5|B2HQR5_MYCMM Conserved transmembrane transport protein-MmpL family OS=Mycobacterium marinum (strain ATCC BAA-535 / M) GN=MMAR_0775 PE=4 SV=1	30	29	32.1	109.94	35.2864	41.4033	30.2736	20.1083	1.17335	1.36764	0.664218
rsmA	192	B2HDK0	>tr|B2HDK0|B2HDK0_MYCMM Ribosomal RNA small subunit methyltransferase A OS=Mycobacterium marinum (strain ATCC BAA-535 / M) GN=rsmA PE=3 SV=1	10	10	39.8	29.569	5.94372	4.63823	3.39304	4.11721	0.780358	1.36698	1.21343
MMAR_4229	3448	B2HS59	>tr|B2HS59|B2HS59_MYCMM Uncharacterized protein OS=Mycobacterium marinum (strain ATCC BAA-535 / M) GN=MMAR_4229 PE=4 SV=1	8	8	77.2	13.023	8.43078	9.3468	6.83884	7.23514	1.10865	1.36672	1.05795
rplW	3572	B2HSN3	>sp|B2HSN3|RL23_MYCMM 50S ribosomal protein L23 OS=Mycobacterium marinum (strain ATCC BAA-535 / M) GN=rplW PE=3 SV=1	10	10	81	10.953	10.4617	24.5762	17.9907	19.0544	2.34916	1.36605	1.05912
MMAR_2004	2177	B2HLZ0	>tr|B2HLZ0|B2HLZ0_MYCMM Conserved hypothetical membrane protein OS=Mycobacterium marinum (strain ATCC BAA-535 / M) GN=MMAR_2004 PE=4 SV=1	5	5	39.7	15.444	10.9064	10.8147	7.9171	10.8636	0.991597	1.366	1.37217
arsC	2221	B2HM41	>tr|B2HM41|B2HM41_MYCMM Arsenic-transport integral membrane protein ArsC OS=Mycobacterium marinum (strain ATCC BAA-535 / M) GN=arsC PE=4 SV=1	3	3	6.7	54.772	9.43477	9.7814	7.16695	7.2024	1.03674	1.36479	1.00495
MMAR_4366	3687	B2HT52	>tr|B2HT52|B2HT52_MYCMM Conserved protein OS=Mycobacterium marinum (strain ATCC BAA-535 / M) GN=MMAR_4366 PE=4 SV=1	11	11	61.4	22.452	19.8162	21.6529	15.887	15.4805	1.09269	1.36294	0.974415
kasB	1179	B2HHR7	>tr|B2HHR7|B2HHR7_MYCMM 3-oxoacyl-[acyl-carrier protein] synthase 2 KasB OS=Mycobacterium marinum (strain ATCC BAA-535 / M) GN=kasB PE=3 SV=1	16	16	53	44.178	69.6033	50.9736	37.429	50.0154	0.732346	1.36188	1.33627
MMAR_5392	2364	B2HMM7	>tr|B2HMM7|B2HMM7_MYCMM Transcriptional regulatory protein OS=Mycobacterium marinum (strain ATCC BAA-535 / M) GN=MMAR_5392 PE=4 SV=1	11	11	34.5	43.715	9.91384	15.5233	11.4156	10.8418	1.56582	1.35983	0.949731
ask	1826	B2HKD0	>tr|B2HKD0|B2HKD0_MYCMM Aspartokinase OS=Mycobacterium marinum (strain ATCC BAA-535 / M) GN=ask PE=3 SV=1	20	20	43	44.443	22.8511	42.8946	31.5629	60.4121	1.87713	1.35902	1.91402
guaB2	75	B2HD22	>tr|B2HD22|B2HD22_MYCMM Inosine-5-monophosphate dehydrogenase OS=Mycobacterium marinum (strain ATCC BAA-535 / M) GN=guaB2 PE=3 SV=1	30	30	54.1	55.389	54.0757	41.2626	30.3791	35.5997	0.763052	1.35825	1.17185
MMAR_1571	1053	B2HH91	>tr|B2HH91|B2HH91_MYCMM Uncharacterized protein OS=Mycobacterium marinum (strain ATCC BAA-535 / M) GN=MMAR_1571 PE=4 SV=1	18	18	30.2	61.746	25.2235	29.9195	22.0812	18.0769	1.18617	1.35498	0.818659
fadD32	2343	B2HMK0	>sp|B2HMK0|FAA32_MYCMM Long-chain-fatty-acid--AMP ligase FadD32 OS=Mycobacterium marinum (strain ATCC BAA-535 / M) GN=fadD32 PE=3 SV=1	33	33	51.2	68.89	124.009	115.474	85.324	108.342	0.931177	1.35336	1.26977
MMAR_1511	863	B2HGH6	>tr|B2HGH6|B2HGH6_MYCMM Monophosphatase OS=Mycobacterium marinum (strain ATCC BAA-535 / M) GN=MMAR_1511 PE=4 SV=1	9	9	44.7	28.124	5.95518	4.66168	3.4458	5.68164	0.782793	1.35286	1.64886
MMAR_3230	949	B2HGV3	>tr|B2HGV3|B2HGV3_MYCMM Uncharacterized protein OS=Mycobacterium marinum (strain ATCC BAA-535 / M) GN=MMAR_3230 PE=4 SV=1	5	5	41.1	14.434	5.43026	4.66168	3.4458	4.6496	0.858464	1.35286	1.34936
MMAR_1430	698	B2HFP3	>tr|B2HFP3|B2HFP3_MYCMM Uncharacterized protein OS=Mycobacterium marinum (strain ATCC BAA-535 / M) GN=MMAR_1430 PE=4 SV=1	13	13	93.9	10.294	73.9263	85.425	63.2313	40.9017	1.15554	1.35099	0.646859
ftsK	1952	B2HKZ6	>tr|B2HKZ6|B2HKZ6_MYCMM Cell division transmembrane protein FtsK OS=Mycobacterium marinum (strain ATCC BAA-535 / M) GN=ftsK PE=4 SV=1	37	37	42.3	92.347	55.5588	55.7994	41.3084	40.2274	1.00433	1.3508	0.973832
MMAR_4079	3043	B2HQJ4	>tr|B2HQJ4|B2HQJ4_MYCMM Adenylate cyclase OS=Mycobacterium marinum (strain ATCC BAA-535 / M) GN=MMAR_4079 PE=4 SV=1	11	3	25.5	57.663	11.9104	13.4566	9.96811	13.4164	1.12983	1.34997	1.34593
ahpC	106	B2HD60	>tr|B2HD60|B2HD60_MYCMM Alkyl hydroperoxide reductase C protein AhpC OS=Mycobacterium marinum (strain ATCC BAA-535 / M) GN=ahpC PE=4 SV=1	14	14	60.5	21.468	18.3676	14.4431	10.7183	11.3087	0.786337	1.34752	1.05509
pdxT	2479	B2HN48	>sp|B2HN48|PDXT_MYCMM Glutamine amidotransferase subunit PdxT OS=Mycobacterium marinum (strain ATCC BAA-535 / M) GN=pdxT PE=3 SV=1	10	10	51	20.993	11.9218	7.69131	5.70782	11.8411	0.645145	1.3475	2.07454
MMAR_5252	2035	B2HLC5	>tr|B2HLC5|B2HLC5_MYCMM Oxidoreductase OS=Mycobacterium marinum (strain ATCC BAA-535 / M) GN=MMAR_5252 PE=4 SV=1	9	9	27.3	34.667	8.44224	7.69131	5.70782	8.77774	0.91105	1.3475	1.53784
MMAR_2573	3403	B2HRY9	>tr|B2HRY9|B2HRY9_MYCMM Conserved protein OS=Mycobacterium marinum (strain ATCC BAA-535 / M) GN=MMAR_2573 PE=4 SV=1	9	9	39.2	31.077	7.44971	6.15305	4.57681	7.73479	0.825944	1.3444	1.68999
purF	1008	B2HH30	>tr|B2HH30|B2HH30_MYCMM Amidophosphoribosyltransferase OS=Mycobacterium marinum (strain ATCC BAA-535 / M) GN=purF PE=3 SV=1	14	14	33.9	54.315	8.40785	8.31348	6.1942	6.20311	0.988776	1.34214	1.00144
adhE2	1188	B2HHS8	>tr|B2HHS8|B2HHS8_MYCMM Zinc-dependent alcohol dehydrogenase AdhE2 OS=Mycobacterium marinum (strain ATCC BAA-535 / M) GN=adhE2 PE=3 SV=1	6	6	11.6	37.864	12.4009	11.4134	8.50898	9.82068	0.920372	1.34134	1.15415
MMAR_0357	2136	B2HLS5	>sp|B2HLS5|Y357_MYCMM Putative S-adenosyl-L-methionine-dependent methyltransferase MMAR_0357 OS=Mycobacterium marinum (strain ATCC BAA-535 / M) GN=MMAR_0357 PE=3 SV=2	14	13	43.5	34.564	17.8426	14.3727	10.7183	11.8957	0.805528	1.34096	1.10985
ctaD	1106	B2HHG9	>tr|B2HHG9|B2HHG9_MYCMM Cytochrome C oxidase polypeptide I CtaD OS=Mycobacterium marinum (strain ATCC BAA-535 / M) GN=ctaD PE=3 SV=1	9	7	13.8	63.664	58.502	75.7968	56.5623	58.2935	1.29563	1.34006	1.03061
plcB_4	2015	B2HL97	>tr|B2HL97|B2HL97_MYCMM Membrane-associated phospholipase C 2 PlcB_4 OS=Mycobacterium marinum (strain ATCC BAA-535 / M) GN=plcB_4 PE=4 SV=1	11	10	24.2	56.496	7.96318	11.39	8.50898	7.73479	1.43033	1.33859	0.909014
MMAR_5443	2392	B2HMT1	>tr|B2HMT1|B2HMT1_MYCMM Conserved hypothetical membrane protein OS=Mycobacterium marinum (strain ATCC BAA-535 / M) GN=MMAR_5443 PE=4 SV=1	26	26	42.1	62.213	25.2579	24.7998	18.5298	26.8219	0.98186	1.33837	1.4475
MMAR_1117	59	B2HD01	>tr|B2HD01|B2HD01_MYCMM Conserved transmembrane protein OS=Mycobacterium marinum (strain ATCC BAA-535 / M) GN=MMAR_1117 PE=3 SV=1	10	10	25.8	47.633	7.41532	6.70488	5.01043	4.63869	0.904193	1.33818	0.925806
MMAR_1448	705	B2HFQ6	>tr|B2HFQ6|B2HFQ6_MYCMM Zinc cation transport ATPase OS=Mycobacterium marinum (strain ATCC BAA-535 / M) GN=MMAR_1448 PE=3 SV=1	35	35	36.6	88.02	111.106	125.373	93.8858	89.8087	1.12841	1.33538	0.956574
MMAR_1800	1642	B2HJL3	>tr|B2HJL3|B2HJL3_MYCMM UPF0109 protein MMAR_1800 OS=Mycobacterium marinum (strain ATCC BAA-535 / M) GN=MMAR_1800 PE=3 SV=1	9	9	80	8.5546	8.43078	8.33692	6.24695	3.59574	0.988868	1.33456	0.575599
MMAR_2262	2761	B2HPA7	>tr|B2HPA7|B2HPA7_MYCMM Unidentified antibiotic-transport integral membrane ABC transporter OS=Mycobacterium marinum (strain ATCC BAA-535 / M) GN=MMAR_2262 PE=4 SV=1	2	2	14.5	27.378	6.45718	6.75177	5.06319	10.3094	1.04562	1.3335	2.03615
MMAR_2439	3181	B2HR03	>tr|B2HR03|B2HR03_MYCMM Conserved transmembrane protein OS=Mycobacterium marinum (strain ATCC BAA-535 / M) GN=MMAR_2439 PE=4 SV=1	6	6	11.4	62.576	5.95518	6.75177	5.06319	7.7457	1.13376	1.3335	1.52981
MMAR_2651	3605	B2HSS3	>tr|B2HSS3|B2HSS3_MYCMM Transcriptional regulatory protein OS=Mycobacterium marinum (strain ATCC BAA-535 / M) GN=MMAR_2651 PE=4 SV=1	7	7	38.6	20.025	5.94372	6.75177	5.06319	3.08518	1.13595	1.3335	0.609336
MMAR_3479	1697	B2HJV6	>tr|B2HJV6|B2HJV6_MYCMM Two-component sensor histidine kinase OS=Mycobacterium marinum (strain ATCC BAA-535 / M) GN=MMAR_3479 PE=4 SV=1	23	23	42.6	59.241	20.8202	21.6763	16.2678	20.6407	1.04112	1.33247	1.2688
lipQ	2595	B2HNJ3	>tr|B2HNJ3|B2HNJ3_MYCMM Carboxylesterase LipQ OS=Mycobacterium marinum (strain ATCC BAA-535 / M) GN=lipQ PE=4 SV=1	11	11	33.3	44.156	6.45718	5.16662	3.87942	6.18128	0.800135	1.3318	1.59335
ffh	1636	B2HJK5	>tr|B2HJK5|B2HJK5_MYCMM Signal recognition particle protein OS=Mycobacterium marinum (strain ATCC BAA-535 / M) GN=ffh PE=3 SV=1	24	24	41.6	55.288	58.5134	61.471	46.1606	62.8994	1.05054	1.33168	1.36262
MMAR_3176	913	B2HGQ3	>tr|B2HGQ3|B2HGQ3_MYCMM Non-ribosomal peptide synthetase OS=Mycobacterium marinum (strain ATCC BAA-535 / M) GN=MMAR_3176 PE=4 SV=1	54	53	23.2	741.77	48.634	34.6515	26.0249	26.811	0.712495	1.33147	1.03021
pknI	1638	B2HJK7	>tr|B2HJK7|B2HJK7_MYCMM Transmembrane serine/threonine-protein kinase I PknI OS=Mycobacterium marinum (strain ATCC BAA-535 / M) GN=pknI PE=4 SV=1	14	14	23.2	62.946	13.4278	13.9147	10.4545	20.1083	1.03626	1.33098	1.92341
mmpS5	3551	B2HSK5	>tr|B2HSK5|B2HSK5_MYCMM Conserved transmembrane proteinm, MmpS5 OS=Mycobacterium marinum (strain ATCC BAA-535 / M) GN=mmpS5 PE=4 SV=1	8	8	54.9	15.257	6.48011	10.4505	7.86434	15.0027	1.6127	1.32884	1.90768
MMAR_1344	502	B2HEU6	>tr|B2HEU6|B2HEU6_MYCMM Soj/ParA-related protein OS=Mycobacterium marinum (strain ATCC BAA-535 / M) GN=MMAR_1344 PE=4 SV=1	10	10	31.2	28.405	21.7898	17.1084	12.8748	19.565	0.785158	1.32883	1.51963
MMAR_3333	1173	B2HHR1	>tr|B2HHR1|B2HHR1_MYCMM Uncharacterized protein OS=Mycobacterium marinum (strain ATCC BAA-535 / M) GN=MMAR_3333 PE=4 SV=1	7	7	33	20.82	16.3825	14.948	11.2574	14.9154	0.912439	1.32784	1.32494
guaB1	3647	B2HSY5	>tr|B2HSY5|B2HSY5_MYCMM Inosine-5-monophosphate dehydrogenase GuaB1 OS=Mycobacterium marinum (strain ATCC BAA-535 / M) GN=guaB1 PE=3 SV=1	11	11	35.1	49.807	7.41532	9.7814	7.37797	10.2985	1.31908	1.32576	1.39584
MMAR_4019	3002	B2HQD4	>tr|B2HQD4|B2HQD4_MYCMM Transcriptional regulatory protein OS=Mycobacterium marinum (strain ATCC BAA-535 / M) GN=MMAR_4019 PE=4 SV=1	3	3	12.4	29.461	5.95518	6.70488	5.06319	7.73479	1.12589	1.32424	1.52765
rne	2317	B2HMG4	>tr|B2HMG4|B2HMG4_MYCMM Ribonuclease E Rne OS=Mycobacterium marinum (strain ATCC BAA-535 / M) GN=rne PE=4 SV=1	57	57	55.8	110.19	94.8268	87.9263	66.4777	94.3382	0.92723	1.32264	1.4191
metC	250	B2HDS7	>tr|B2HDS7|B2HDS7_MYCMM O-acetylhomoserine sulfhydrylase MetC OS=Mycobacterium marinum (strain ATCC BAA-535 / M) GN=metC PE=3 SV=1	10	10	27.4	47.398	19.3486	23.8368	18.0435	22.7593	1.23196	1.32107	1.26136
citE_2	1063	B2HHA3	>tr|B2HHA3|B2HHA3_MYCMM Citrate lyase beta subunit, CitE_2 OS=Mycobacterium marinum (strain ATCC BAA-535 / M) GN=citE_2 PE=4 SV=1	13	13	49.2	33.404	6.95918	6.68143	5.06319	9.84252	0.960089	1.31961	1.94394
galE3	3338	B2HRM7	>tr|B2HRM7|B2HRM7_MYCMM UDP-glucose 4-epimerase, GalE3 OS=Mycobacterium marinum (strain ATCC BAA-535 / M) GN=galE3 PE=4 SV=1	9	9	24	36.372	5.95518	3.05308	2.31478	4.12813	0.512675	1.31895	1.78338
MMAR_2035	2204	B2HM20	>tr|B2HM20|B2HM20_MYCMM Uncharacterized protein OS=Mycobacterium marinum (strain ATCC BAA-535 / M) GN=MMAR_2035 PE=4 SV=1	9	9	23.4	47.123	7.44971	6.72832	5.11594	2.58554	0.903166	1.31517	0.505389
MMAR_1144	81	B2HD29	>tr|B2HD29|B2HD29_MYCMM Hydrolase OS=Mycobacterium marinum (strain ATCC BAA-535 / M) GN=MMAR_1144 PE=4 SV=1	12	12	35.8	26.597	5.45319	6.72832	5.11594	6.71367	1.23383	1.31517	1.3123
MMAR_0997	3542	B2HSJ6	>tr|B2HSJ6|B2HSJ6_MYCMM Ceramidase OS=Mycobacterium marinum (strain ATCC BAA-535 / M) GN=MMAR_0997 PE=4 SV=1	36	36	51.6	68.756	65.9632	78.7201	59.891	55.7298	1.1934	1.31439	0.93052
fadE23	861	B2HGH4	>tr|B2HGH4|B2HGH4_MYCMM Acyl-CoA dehydrogenase FadE23 OS=Mycobacterium marinum (strain ATCC BAA-535 / M) GN=fadE23 PE=3 SV=1	23	23	46.1	43.507	40.1688	40.0651	30.4846	25.779	0.997419	1.31427	0.845639
MMAR_4394	3712	B2HT80	>tr|B2HT80|B2HT80_MYCMM Conserved hypothetical transmembrane protein OS=Mycobacterium marinum (strain ATCC BAA-535 / M) GN=MMAR_4394 PE=4 SV=1	7	7	19.6	29.16	22.3033	22.1813	16.9125	23.7149	0.99453	1.31153	1.40222
cysA2	998	B2HH17	>tr|B2HH17|B2HH17_MYCMM Sulfurtransferase OS=Mycobacterium marinum (strain ATCC BAA-535 / M) GN=cysA2 PE=4 SV=1	13	13	49.3	30.921	48.6111	34.1231	26.0661	24.7688	0.701962	1.3091	0.950231
gltX	1387	B2HIH4	>sp|B2HIH4|SYE_MYCMM Glutamate--tRNA ligase OS=Mycobacterium marinum (strain ATCC BAA-535 / M) GN=gltX PE=3 SV=1	24	24	40.1	53.714	11.8989	8.79497	6.73333	10.8636	0.739141	1.30618	1.61341
pgk	2742	B2HP85	>sp|B2HP85|PGK_MYCMM Phosphoglycerate kinase OS=Mycobacterium marinum (strain ATCC BAA-535 / M) GN=pgk PE=3 SV=1	23	23	62.7	42.93	14.386	16.9443	12.9803	23.2044	1.17784	1.30539	1.78766
MMAR_1274	454	B2HEM5	>tr|B2HEM5|B2HEM5_MYCMM Uncharacterized protein OS=Mycobacterium marinum (strain ATCC BAA-535 / M) GN=MMAR_1274 PE=4 SV=1	19	19	39.6	49.941	21.8471	17.0147	13.0858	12.3953	0.778805	1.30024	0.947234
eis	2294	B2HMD6	>tr|B2HMD6|B2HMD6_MYCMM Enhanced intracellular survival protein Eis OS=Mycobacterium marinum (strain ATCC BAA-535 / M) GN=eis PE=4 SV=1	19	19	51.6	43.043	3.47959	14.4665	11.1519	32.9814	4.15754	1.29723	2.95747
MMAR_1980	1962	B2HL09	>tr|B2HL09|B2HL09_MYCMM Conserved membrane protein OS=Mycobacterium marinum (strain ATCC BAA-535 / M) GN=MMAR_1980 PE=4 SV=1	7	7	32.5	21.979	10.3814	11.8012	9.10087	10.7981	1.13675	1.29671	1.1865
fgd1	2888	B2HPZ1	>tr|B2HPZ1|B2HPZ1_MYCMM F420-dependent glucose-6-phosphate dehydrogenase OS=Mycobacterium marinum (strain ATCC BAA-535 / M) GN=fgd1 PE=3 SV=1	9	9	31.5	37.281	5.94372	5.09628	3.93217	6.69184	0.857422	1.29605	1.70182
ctpH_1	281	B2HDX0	>tr|B2HDX0|B2HDX0_MYCMM Metal cation transporting p-type ATPase CtpH_1 OS=Mycobacterium marinum (strain ATCC BAA-535 / M) GN=ctpH_1 PE=4 SV=1	43	43	33	155.2	30.7914	37.7046	29.1014	41.8028	1.22452	1.29563	1.43645
MMAR_0878	3334	B2HRM3	>tr|B2HRM3|B2HRM3_MYCMM Conserved hypothetical membrane protein OS=Mycobacterium marinum (strain ATCC BAA-535 / M) GN=MMAR_0878 PE=4 SV=1	4	4	42.5	10.983	7.44971	10.3098	7.96985	7.7457	1.38392	1.2936	0.971875
MMAR_5382	2358	B2HML7	>tr|B2HML7|B2HML7_MYCMM Uncharacterized protein OS=Mycobacterium marinum (strain ATCC BAA-535 / M) GN=MMAR_5382 PE=4 SV=1	8	8	56	12.597	9.43477	12.4702	9.64	10.8855	1.32173	1.29359	1.1292
MMAR_1572	1054	B2HH92	>tr|B2HH92|B2HH92_MYCMM Hypothetical alanine and valine rich protein OS=Mycobacterium marinum (strain ATCC BAA-535 / M) GN=MMAR_1572 PE=4 SV=1	15	15	40.9	32.289	25.7714	43.0822	33.3385	22.6829	1.67171	1.29226	0.68038
dnaJ	2837	B2HPS3	>tr|B2HPS3|B2HPS3_MYCMM Chaperone protein DnaJ OS=Mycobacterium marinum (strain ATCC BAA-535 / M) GN=dnaJ PE=3 SV=1	26	26	58.6	41.571	39.7356	45.4897	35.2197	41.7591	1.14481	1.2916	1.18567
glpQ1	2366	B2HMM9	>tr|B2HMM9|B2HMM9_MYCMM Glycerophosphoryl diester phosphodiesterase GlpQ1 OS=Mycobacterium marinum (strain ATCC BAA-535 / M) GN=glpQ1 PE=4 SV=1	11	11	52.7	30.525	7.42678	5.21351	4.03768	6.71367	0.701988	1.29121	1.66275
MMAR_4074	3039	B2HQI9	>tr|B2HQI9|B2HQI9_MYCMM Thioredoxin OS=Mycobacterium marinum (strain ATCC BAA-535 / M) GN=MMAR_4074 PE=4 SV=1	6	6	24.7	31.931	5.95518	5.14317	3.98493	5.16016	0.863646	1.29066	1.29492
holA	2291	B2HMD0	>tr|B2HMD0|B2HMD0_MYCMM DNA polymerase III, delta subunit HolA OS=Mycobacterium marinum (strain ATCC BAA-535 / M) GN=holA PE=4 SV=1	13	13	38.5	34.157	10.9408	8.19625	6.35246	7.21331	0.749147	1.29025	1.13551
ahcY	472	B2HEP6	>sp|B2HEP6|SAHH_MYCMM Adenosylhomocysteinase OS=Mycobacterium marinum (strain ATCC BAA-535 / M) GN=ahcY PE=3 SV=1	32	32	57.3	53.884	51.0408	53.2513	41.3084	57.2505	1.04331	1.28912	1.38593
MMAR_0822	3146	B2HQW2	>tr|B2HQW2|B2HQW2_MYCMM Conserved protein OS=Mycobacterium marinum (strain ATCC BAA-535 / M) GN=MMAR_0822 PE=4 SV=1	23	23	54.9	36.595	52.6156	59.1104	45.8852	65.5286	1.12344	1.28822	1.4281
MMAR_4686	630	B2HFC8	>tr|B2HFC8|B2HFC8_MYCMM Conserved hypothetical membrane protein OS=Mycobacterium marinum (strain ATCC BAA-535 / M) GN=MMAR_4686 PE=4 SV=1	2	2	12.4	20.646	8.44224	10.8147	8.40348	12.3844	1.28102	1.28693	1.47372
lpdA	278	B2HDW6	>tr|B2HDW6|B2HDW6_MYCMM Dihydrolipoamide dehydrogenase LpdA OS=Mycobacterium marinum (strain ATCC BAA-535 / M) GN=lpdA PE=4 SV=1	10	10	27.5	49.189	8.90985	7.20982	5.60232	9.77702	0.809196	1.28693	1.74517
MMAR_0439	2424	B2HMW7	>tr|B2HMW7|B2HMW7_MYCMM Conserved membrane protein OS=Mycobacterium marinum (strain ATCC BAA-535 / M) GN=MMAR_0439 PE=4 SV=1	7	7	30.7	22.74	13.9184	14.4665	11.2574	16.5125	1.03938	1.28507	1.46682
MMAR_1717	1385	B2HIH2	>tr|B2HIH2|B2HIH2_MYCMM Conserved integral membrane transport protein OS=Mycobacterium marinum (strain ATCC BAA-535 / M) GN=MMAR_1717 PE=4 SV=1	6	6	11.8	46.251	7.42678	8.77152	6.83884	8.76682	1.18107	1.2826	1.28192
cysS	1535	B2HJ21	>sp|B2HJ21|SYC_MYCMM Cysteine--tRNA ligase OS=Mycobacterium marinum (strain ATCC BAA-535 / M) GN=cysS PE=3 SV=1	12	12	25.9	51.724	10.4388	9.32335	7.27246	9.77702	0.893147	1.28201	1.34439
ubiE	3358	B2HRQ2	>sp|B2HRQ2|UBIE_MYCMM Demethylmenaquinone methyltransferase OS=Mycobacterium marinum (strain ATCC BAA-535 / M) GN=ubiE PE=3 SV=1	9	9	42.9	25.069	10.4273	12.9517	10.1264	12.884	1.2421	1.27901	1.27232
yjcE	1487	B2HIV5	>tr|B2HIV5|B2HIV5_MYCMM Conserved integral membrane transport protein YjcE OS=Mycobacterium marinum (strain ATCC BAA-535 / M) GN=yjcE PE=4 SV=1	4	4	7.9	56.898	5.95518	10.8147	8.45623	10.3312	1.81602	1.27891	1.22173
MMAR_3081	734	B2HFV2	>tr|B2HFV2|B2HFV2_MYCMM Conserved protein OS=Mycobacterium marinum (strain ATCC BAA-535 / M) GN=MMAR_3081 PE=4 SV=1	6	6	29.5	34.491	5.47612	3.58146	2.80116	2.56371	0.654015	1.27856	0.915231
MMAR_2268	2767	B2HPB3	>tr|B2HPB3|B2HPB3_MYCMM Conserved ATP-binding protein ABC transporter OS=Mycobacterium marinum (strain ATCC BAA-535 / M) GN=MMAR_2268 PE=4 SV=1	17	17	73.1	28.026	12.3894	13.4332	10.5072	20.5861	1.08425	1.27847	1.95923
acpM	1177	B2HHR5	>tr|B2HHR5|B2HHR5_MYCMM Acyl carrier protein OS=Mycobacterium marinum (strain ATCC BAA-535 / M) GN=acpM PE=3 SV=1	11	11	53	12.487	82.7674	89.8991	70.5037	95.6977	1.08617	1.2751	1.35734
celA	1596	B2HJA9	>tr|B2HJA9|B2HJA9_MYCMM Cellobiohydrolase a (1,4-beta-cellobiosidase a) CelA OS=Mycobacterium marinum (strain ATCC BAA-535 / M) GN=celA PE=4 SV=1	7	7	25.7	36.348	10.9522	7.20982	5.65507	4.1063	0.658296	1.27493	0.726127
MMAR_2085	2244	B2HM71	>tr|B2HM71|B2HM71_MYCMM Uncharacterized protein OS=Mycobacterium marinum (strain ATCC BAA-535 / M) GN=MMAR_2085 PE=4 SV=1	3	3	23.4	18.038	6.93625	7.20982	5.65507	7.23514	1.03944	1.27493	1.27941
MMAR_4245	3460	B2HS75	>tr|B2HS75|B2HS75_MYCMM Uncharacterized protein OS=Mycobacterium marinum (strain ATCC BAA-535 / M) GN=MMAR_4245 PE=4 SV=1	27	27	86.1	32.41	53.5967	61.4007	48.2	39.6732	1.14561	1.27387	0.823096
MMAR_1366	661	B2HFI0	>tr|B2HFI0|B2HFI0_MYCMM Conserved ATP-binding protein ABC transporter OS=Mycobacterium marinum (strain ATCC BAA-535 / M) GN=MMAR_1366 PE=4 SV=1	14	14	35.1	49.062	12.88	15.0184	11.7965	8.24535	1.16602	1.27312	0.698964
accA2	379	B2HEB5	>tr|B2HEB5|B2HEB5_MYCMM Acetyl-/propionyl-coenzyme A carboxylase alpha chain, AccA2 OS=Mycobacterium marinum (strain ATCC BAA-535 / M) GN=accA2 PE=4 SV=1	19	19	32.6	70.146	19.3372	15.4998	12.1774	8.23443	0.801558	1.27284	0.676207
MMAR_2197	2558	B2HNE8	>tr|B2HNE8|B2HNE8_MYCMM Secreted protein OS=Mycobacterium marinum (strain ATCC BAA-535 / M) GN=MMAR_2197 PE=4 SV=1	10	10	37.6	18.736	16.8616	18.0949	14.2168	11.3305	1.07314	1.27278	0.796981
mmsB	32	B2HCW1	>tr|B2HCW1|B2HCW1_MYCMM 3-hydroxyisobutyrate dehydrogenase, MmsB OS=Mycobacterium marinum (strain ATCC BAA-535 / M) GN=mmsB PE=4 SV=1	5	5	26.9	29.411	5.47612	3.62835	2.85391	4.6496	0.662578	1.27136	1.6292
MMAR_2503	3227	B2HR68	>tr|B2HR68|B2HR68_MYCMM Uncharacterized protein OS=Mycobacterium marinum (strain ATCC BAA-535 / M) GN=MMAR_2503 PE=4 SV=1	16	16	53.3	31.936	78.3755	89.194	70.2284	67.8085	1.13803	1.27006	0.965543
fadE2_1	1619	B2HJF7	>tr|B2HJF7|B2HJF7_MYCMM Acyl-CoA dehydrogenase FadE2_1 OS=Mycobacterium marinum (strain ATCC BAA-535 / M) GN=fadE2_1 PE=3 SV=1	19	19	49.6	45.176	6.43425	5.74189	4.52406	14.9481	0.892395	1.26919	3.30414
pks15/1	1425	B2HIL7	>sp|B2HIL7|MSL7_MYCMM Phenolphthiocerol synthesis polyketide synthase type I Pks15/1 OS=Mycobacterium marinum (strain ATCC BAA-535 / M) GN=pks15/1 PE=1 SV=1	51	47	28.8	217.74	110.091	108.358	85.4707	58.2935	0.984264	1.26778	0.682029
MMAR_4558	396	B2HED9	>tr|B2HED9|B2HED9_MYCMM Conserved secreted protein OS=Mycobacterium marinum (strain ATCC BAA-535 / M) GN=MMAR_4558 PE=3 SV=1	18	18	61.8	26.374	34.1907	33.0429	26.0661	38.663	0.966429	1.26766	1.48327
katG	347	B2HE73	>sp|B2HE73|KATG_MYCMM Catalase-peroxidase OS=Mycobacterium marinum (strain ATCC BAA-535 / M) GN=katG PE=3 SV=1	31	31	44.7	81.031	42.6903	39.8181	31.4162	46.4306	0.932721	1.26744	1.47792
MMAR_0821	3145	B2HQW1	>tr|B2HQW1|B2HQW1_MYCMM Uncharacterized protein OS=Mycobacterium marinum (strain ATCC BAA-535 / M) GN=MMAR_0821 PE=4 SV=1	16	16	52.3	29.362	23.8322	31.5046	24.8823	31.4497	1.32194	1.26615	1.26394
rpmD	12	B2HCT9	>sp|B2HCT9|RL30_MYCMM 50S ribosomal protein L30 OS=Mycobacterium marinum (strain ATCC BAA-535 / M) GN=rpmD PE=3 SV=1	7	7	79.2	8.0741	12.3894	12.9517	10.2319	12.9277	1.04538	1.26582	1.26347
MMAR_3630	1999	B2HL69	>tr|B2HL69|B2HL69_MYCMM Membrane protein OS=Mycobacterium marinum (strain ATCC BAA-535 / M) GN=MMAR_3630 PE=4 SV=1	3	3	18.9	25.278	11.3969	14.9949	11.8493	13.9161	1.3157	1.26547	1.17442
MMAR_2165	2531	B2HNB6	>tr|B2HNB6|B2HNB6_MYCMM Transglutaminase family protein OS=Mycobacterium marinum (strain ATCC BAA-535 / M) GN=MMAR_2165 PE=4 SV=1	56	56	47.2	122.25	117.119	123.705	97.8	158.955	1.05624	1.26488	1.62531
MMAR_1725	1393	B2HII0	>tr|B2HII0|B2HII0_MYCMM Transcriptional regulatory protein OS=Mycobacterium marinum (strain ATCC BAA-535 / M) GN=MMAR_1725 PE=4 SV=1	11	11	53.6	24.494	8.43078	5.71845	4.52406	3.59574	0.678282	1.26401	0.794804
MMAR_4583	414	B2HEG3	>tr|B2HEG3|B2HEG3_MYCMM Uncharacterized protein OS=Mycobacterium marinum (strain ATCC BAA-535 / M) GN=MMAR_4583 PE=4 SV=1	11	11	45.9	26.963	7.94025	9.29991	7.37797	12.9059	1.17124	1.2605	1.74924
pknL	939	B2HGT4	>tr|B2HGT4|B2HGT4_MYCMM Transmembrane serine/threonine-protein kinase L PknL OS=Mycobacterium marinum (strain ATCC BAA-535 / M) GN=pknL PE=4 SV=1	12	12	33.2	46.276	14.3974	14.9949	11.902	11.3633	1.0415	1.25986	0.954735
MMAR_4858	988	B2HH07	>tr|B2HH07|B2HH07_MYCMM Uncharacterized protein OS=Mycobacterium marinum (strain ATCC BAA-535 / M) GN=MMAR_4858 PE=4 SV=1	13	13	23.2	75.065	13.9069	11.8715	9.42898	9.29921	0.853641	1.25904	0.986237
lepB	1647	B2HJL8	>tr|B2HJL8|B2HJL8_MYCMM Signal peptidase I LepB OS=Mycobacterium marinum (strain ATCC BAA-535 / M) GN=lepB PE=3 SV=1	16	16	49.1	30.747	52.1021	64.4881	51.2238	52.1777	1.23772	1.25895	1.01862
MMAR_1487	847	B2HGF2	>tr|B2HGF2|B2HGF2_MYCMM Conserved protein OS=Mycobacterium marinum (strain ATCC BAA-535 / M) GN=MMAR_1487 PE=4 SV=1	8	8	38.5	19.343	6.44572	13.527	10.771	11.3633	2.0986	1.25587	1.05499
fadE25_2	1613	B2HJF0	>tr|B2HJF0|B2HJF0_MYCMM Acyl-CoA dehydrogenase FadE25_2 OS=Mycobacterium marinum (strain ATCC BAA-535 / M) GN=fadE25_2 PE=3 SV=1	13	13	36.7	43.767	6.45718	7.16292	5.70782	6.1922	1.1093	1.25493	1.08486
MMAR_2539	3392	B2HRV8	>tr|B2HRV8|B2HRV8_MYCMM Uncharacterized protein OS=Mycobacterium marinum (strain ATCC BAA-535 / M) GN=MMAR_2539 PE=4 SV=1	6	6	24.9	35.703	22.8053	36.4242	29.0255	22.7047	1.59718	1.2549	0.782234
mihF	2708	B2HP46	>tr|B2HP46|B2HP46_MYCMM Integration host factor MihF OS=Mycobacterium marinum (strain ATCC BAA-535 / M) GN=mihF PE=4 SV=1	15	15	56.8	12.118	20.7973	24.8232	19.8191	11.2869	1.19358	1.25249	0.569494
MMAR_4656	611	B2HF97	>tr|B2HF97|B2HF97_MYCMM Conserved transmembrane protein OS=Mycobacterium marinum (strain ATCC BAA-535 / M) GN=MMAR_4656 PE=4 SV=1	6	6	15.1	60.025	13.4278	9.7814	7.81159	8.76682	0.728442	1.25216	1.12228
argH	3204	B2HR33	>sp|B2HR33|ARLY_MYCMM Argininosuccinate lyase OS=Mycobacterium marinum (strain ATCC BAA-535 / M) GN=argH PE=3 SV=1	15	15	26.6	49.907	5.98958	4.18019	3.34029	7.73479	0.69791	1.25144	2.3156
mbtD	2260	B2HM91	>tr|B2HM91|B2HM91_MYCMM Polyketide synthase MbtD OS=Mycobacterium marinum (strain ATCC BAA-535 / M) GN=mbtD PE=4 SV=1	16	16	18.5	108.9	10.9064	10.3801	8.29797	10.8418	0.951749	1.25092	1.30656
MMAR_1780	1626	B2HJJ3	>tr|B2HJJ3|B2HJJ3_MYCMM Conserved protein OS=Mycobacterium marinum (strain ATCC BAA-535 / M) GN=MMAR_1780 PE=4 SV=1	18	18	68	27.077	24.8591	22.2047	17.7681	29.4184	0.893222	1.2497	1.65568
pyrH	1661	B2HJN9	>tr|B2HJN9|B2HJN9_MYCMM Uridylate kinase OS=Mycobacterium marinum (strain ATCC BAA-535 / M) GN=pyrH PE=3 SV=1	7	7	37	27.787	8.43078	7.7382	6.1942	6.1922	0.917851	1.24927	0.999676
manB	457	B2HEM8	>tr|B2HEM8|B2HEM8_MYCMM D-alpha-D-mannose-1-phosphate guanylyltransferase ManB OS=Mycobacterium marinum (strain ATCC BAA-535 / M) GN=manB PE=4 SV=1	16	16	46.6	37.685	11.4313	11.3666	9.10087	10.8309	0.994336	1.24895	1.19009
MMAR_5370	2348	B2HMK5	>tr|B2HMK5|B2HMK5_MYCMM Conserved transmembrane protein OS=Mycobacterium marinum (strain ATCC BAA-535 / M) GN=MMAR_5370 PE=4 SV=1	9	9	28.5	32.665	17.3979	20.185	16.1623	20.0973	1.16019	1.24889	1.24347
MMAR_2287	2783	B2HPD2	>tr|B2HPD2|B2HPD2_MYCMM Conserved protein OS=Mycobacterium marinum (strain ATCC BAA-535 / M) GN=MMAR_2287 PE=4 SV=1	17	17	53.1	34.574	31.2934	36.096	28.92	45.333	1.15347	1.24813	1.56753
MMAR_2050	2218	B2HM36	>tr|B2HM36|B2HM36_MYCMM Conserved hypothetical membrane protein OS=Mycobacterium marinum (strain ATCC BAA-535 / M) GN=MMAR_2050 PE=4 SV=1	11	11	37.6	34.454	7.92878	9.85174	7.9171	5.16016	1.24253	1.24436	0.651775
MMAR_4371	3692	B2HT57	>tr|B2HT57|B2HT57_MYCMM Glycosyl hydrolase OS=Mycobacterium marinum (strain ATCC BAA-535 / M) GN=MMAR_4371 PE=4 SV=1	6	6	32.6	31.354	7.95171	5.62466	4.52406	5.68164	0.707352	1.24328	1.25587
mmaA5	2597	B2HNJ9	>tr|B2HNJ9|B2HNJ9_MYCMM Methoxy mycolic acid synthase 5 MmaA5 OS=Mycobacterium marinum (strain ATCC BAA-535 / M) GN=mmaA5 PE=4 SV=1	11	4	27.7	33.215	6.94771	5.62466	4.52406	8.25626	0.80957	1.24328	1.82497
MMAR_0541	2660	B2HNW3	>tr|B2HNW3|B2HNW3_MYCMM Conserved protein OS=Mycobacterium marinum (strain ATCC BAA-535 / M) GN=MMAR_0541 PE=4 SV=1	32	32	43.1	66.999	52.1365	53.7094	43.2011	53.1006	1.03017	1.24324	1.22915
uppS	3699	B2HT66	>tr|B2HT66|B2HT66_MYCMM Isoprenyl transferase OS=Mycobacterium marinum (strain ATCC BAA-535 / M) GN=uppS PE=3 SV=1	15	15	37.8	29.692	43.1579	37.2231	29.9455	40.151	0.862486	1.24303	1.3408
MMAR_0824	3148	B2HQW4	>tr|B2HQW4|B2HQW4_MYCMM Uncharacterized protein OS=Mycobacterium marinum (strain ATCC BAA-535 / M) GN=MMAR_0824 PE=4 SV=1	12	12	44.3	30.342	17.8312	15.453	12.4412	5.64889	0.866627	1.24208	0.454049
MMAR_4329	3664	B2HT15	>tr|B2HT15|B2HT15_MYCMM Conserved hypothetical membrane protein OS=Mycobacterium marinum (strain ATCC BAA-535 / M) GN=MMAR_4329 PE=4 SV=1	10	9	19.9	64.505	10.9064	14.5134	11.691	17.0231	1.33073	1.24142	1.45608
MMAR_1426	696	B2HFN9	>tr|B2HFN9|B2HFN9_MYCMM Conserved hypothetical secreted protein OS=Mycobacterium marinum (strain ATCC BAA-535 / M) GN=MMAR_1426 PE=4 SV=1	11	11	55.9	14.413	32.7306	43.1291	34.7449	35.1874	1.3177	1.24131	1.01273
MMAR_1673	1123	B2HHJ1	>tr|B2HHJ1|B2HHJ1_MYCMM Conserved transmembrane transport protein OS=Mycobacterium marinum (strain ATCC BAA-535 / M) GN=MMAR_1673 PE=4 SV=1	15	15	24.6	72.34	19.3715	24.2714	19.5554	25.8226	1.25294	1.24116	1.32049
trpA	3161	B2HQX9	>sp|B2HQX9|TRPA_MYCMM Tryptophan synthase alpha chain OS=Mycobacterium marinum (strain ATCC BAA-535 / M) GN=trpA PE=3 SV=1	13	13	45	27.976	9.43477	9.87519	7.96985	8.77774	1.04668	1.23907	1.10137
MMAR_5387	2361	B2HMM2	>tr|B2HMM2|B2HMM2_MYCMM Conserved hypothetical membrane protein OS=Mycobacterium marinum (strain ATCC BAA-535 / M) GN=MMAR_5387 PE=4 SV=1	11	11	28.3	48.493	34.248	34.628	27.9588	22.2051	1.0111	1.23854	0.794206
MMAR_4148	3265	B2HRC4	>tr|B2HRC4|B2HRC4_MYCMM Transmembrane ATP-binding protein ABC transporter OS=Mycobacterium marinum (strain ATCC BAA-535 / M) GN=MMAR_4148 PE=3 SV=1	17	15	27	69.045	10.4044	9.80485	7.9171	8.77774	0.942377	1.23844	1.10871
MMAR_2380	2969	B2HQ86	>tr|B2HQ86|B2HQ86_MYCMM Conserved hypothetical membrane protein OS=Mycobacterium marinum (strain ATCC BAA-535 / M) GN=MMAR_2380 PE=4 SV=1	7	7	10.3	79.549	11.4198	10.3332	8.35072	10.8418	0.904849	1.23741	1.29831
tal	2752	B2HP98	>sp|B2HP98|TAL_MYCMM Transaldolase OS=Mycobacterium marinum (strain ATCC BAA-535 / M) GN=tal PE=3 SV=1	26	26	65.7	40.147	18.3676	13.9147	11.2574	13.9379	0.757569	1.23605	1.23811
MMAR_3625	1994	B2HL64	>tr|B2HL64|B2HL64_MYCMM Conserved hypothetical membrane protein OS=Mycobacterium marinum (strain ATCC BAA-535 / M) GN=MMAR_3625 PE=4 SV=1	7	7	18.5	30.179	15.8461	20.1615	16.3206	16.002	1.27233	1.23534	0.980478
MMAR_1189	254	B2HDT1	>tr|B2HDT1|B2HDT1_MYCMM Conserved integral membrane protein OS=Mycobacterium marinum (strain ATCC BAA-535 / M) GN=MMAR_1189 PE=4 SV=1	4	4	13.5	37.269	6.94771	7.71475	6.24695	8.77774	1.1104	1.23496	1.40512
MMAR_1784	1630	B2HJJ7	>tr|B2HJJ7|B2HJJ7_MYCMM Conserved protein OS=Mycobacterium marinum (strain ATCC BAA-535 / M) GN=MMAR_1784 PE=3 SV=1	11	11	50.4	25.214	7.43825	6.24683	5.06319	7.21331	0.839826	1.23377	1.42466
accA3	299	B2HDZ3	>tr|B2HDZ3|B2HDZ3_MYCMM Bifunctional protein acetyl-/propionyl-coenzyme A carboxylase alpha chain AccA3 OS=Mycobacterium marinum (strain ATCC BAA-535 / M) GN=accA3 PE=4 SV=1	36	36	51.6	63.738	91.1752	77.382	62.7977	67.093	0.848717	1.23224	1.0684
fadE6	2652	B2HNV2	>tr|B2HNV2|B2HNV2_MYCMM Acyl-CoA dehydrogenase FadE6 OS=Mycobacterium marinum (strain ATCC BAA-535 / M) GN=fadE6 PE=3 SV=1	26	26	34.6	78.194	25.3153	23.8368	19.3443	36.1211	0.941597	1.23224	1.86727
ctpD	2772	B2HPC0	>tr|B2HPC0|B2HPC0_MYCMM Cation transporter p-type ATPase D CtpD OS=Mycobacterium marinum (strain ATCC BAA-535 / M) GN=ctpD PE=3 SV=1	8	8	15.9	68.305	9.93677	8.29003	6.73333	4.6496	0.834278	1.23119	0.690536
MMAR_0007	1291	B2HI52	>tr|B2HI52|B2HI52_MYCMM Conserved hypothetical membrane protein OS=Mycobacterium marinum (strain ATCC BAA-535 / M) GN=MMAR_0007 PE=4 SV=1	16	16	51	30.86	43.0776	54.2377	44.0568	46.9739	1.25907	1.23109	1.06621
sulP_1	3365	B2HRQ9	>tr|B2HRQ9|B2HRQ9_MYCMM Transmembrane carbonic anhydrase, SulP_1 OS=Mycobacterium marinum (strain ATCC BAA-535 / M) GN=sulP_1 PE=4 SV=1	5	5	11.6	53.986	9.42331	15.9579	12.9803	10.2985	1.69345	1.22939	0.793395
MMAR_1537	886	B2HGK2	>tr|B2HGK2|B2HGK2_MYCMM Conserved protein OS=Mycobacterium marinum (strain ATCC BAA-535 / M) GN=MMAR_1537 PE=4 SV=1	10	10	48.8	30.773	17.3865	16.4863	13.4139	19.5431	0.948224	1.22904	1.45693
MMAR_0332	2116	B2HLQ0	>tr|B2HLQ0|B2HLQ0_MYCMM Acetyltransferase OS=Mycobacterium marinum (strain ATCC BAA-535 / M) GN=MMAR_0332 PE=4 SV=1	6	6	37.3	22.576	6.44572	6.27028	5.11594	7.21331	0.972782	1.22564	1.40997
plsC	2593	B2HNJ1	>tr|B2HNJ1|B2HNJ1_MYCMM Bifunctional transmembrane phospholipid biosynthesis enzyme PlsC OS=Mycobacterium marinum (strain ATCC BAA-535 / M) GN=plsC PE=4 SV=1	23	23	35.5	69.357	45.2232	51.0674	41.742	55.252	1.12923	1.22341	1.32365
MMAR_4307	3490	B2HSD5	>tr|B2HSD5|B2HSD5_MYCMM Short-chain type dehydrogenase/reductase OS=Mycobacterium marinum (strain ATCC BAA-535 / M) GN=MMAR_4307 PE=3 SV=1	8	8	32	26.262	7.43825	10.8616	8.88985	13.4055	1.46024	1.2218	1.50796
MMAR_5235	1838	B2HKE3	>tr|B2HKE3|B2HKE3_MYCMM Conserved hypothetical dehydrogenase OS=Mycobacterium marinum (strain ATCC BAA-535 / M) GN=MMAR_5235 PE=4 SV=1	15	15	29.8	52.77	14.8994	12.4233	10.1791	11.8738	0.833812	1.22047	1.16649
gnd1	3648	B2HSY6	>tr|B2HSY6|B2HSY6_MYCMM 6-phosphogluconate dehydrogenase, decarboxylating OS=Mycobacterium marinum (strain ATCC BAA-535 / M) GN=gnd1 PE=3 SV=1	12	12	22.4	51.445	12.8914	12.9517	10.6127	13.4273	1.00468	1.22039	1.26521
wag31	915	B2HGQ8	>tr|B2HGQ8|B2HGQ8_MYCMM Conserved secreted antigen Wag31 OS=Mycobacterium marinum (strain ATCC BAA-535 / M) GN=wag31 PE=4 SV=1	26	26	64.8	28.732	78.4787	108.182	88.6527	97.0875	1.37848	1.22028	1.09514
MMAR_3358	1192	B2HHT6	>tr|B2HHT6|B2HHT6_MYCMM Conserved hypothetical proline rich protein OS=Mycobacterium marinum (strain ATCC BAA-535 / M) GN=MMAR_3358 PE=4 SV=1	13	13	20.3	65.131	13.8954	17.6134	14.4394	26.811	1.26757	1.21981	1.85679
MMAR_3310	1162	B2HHN8	>tr|B2HHN8|B2HHN8_MYCMM Conserved transmembrane protein OS=Mycobacterium marinum (strain ATCC BAA-535 / M) GN=MMAR_3310 PE=4 SV=1	8	8	43.4	30.229	8.44224	10.8382	8.88985	12.9059	1.2838	1.21916	1.45175
MMAR_3628	1997	B2HL67	>tr|B2HL67|B2HL67_MYCMM Conserved transmembrane ATP-binding protein ABC transporter OS=Mycobacterium marinum (strain ATCC BAA-535 / M) GN=MMAR_3628 PE=4 SV=1	29	29	37.2	88.572	18.3676	24.7998	20.3698	30.9282	1.35019	1.21747	1.51833
MMAR_1024	3565	B2HSM3	>tr|B2HSM3|B2HSM3_MYCMM Membrane glycosyl transferase OS=Mycobacterium marinum (strain ATCC BAA-535 / M) GN=MMAR_1024 PE=4 SV=1	20	20	42.1	50.953	32.2859	30.0133	24.6713	15.9583	0.929609	1.21653	0.646837
fadD31	301	B2HDZ5	>tr|B2HDZ5|B2HDZ5_MYCMM Acyl-CoA ligase FadD31 OS=Mycobacterium marinum (strain ATCC BAA-535 / M) GN=fadD31 PE=4 SV=1	14	14	30.1	66.357	9.42331	6.22339	5.11594	5.67072	0.660425	1.21647	1.10844
MMAR_0051	1324	B2HI96	>tr|B2HI96|B2HI96_MYCMM Uncharacterized protein OS=Mycobacterium marinum (strain ATCC BAA-535 / M) GN=MMAR_0051 PE=4 SV=1	7	6	27.6	27.532	5.44172	4.06295	3.34029	4.12813	0.74663	1.21635	1.23586
aceE	1174	B2HHR2	>tr|B2HHR2|B2HHR2_MYCMM Pyruvate dehydrogenase E1 component OS=Mycobacterium marinum (strain ATCC BAA-535 / M) GN=aceE PE=3 SV=1	29	29	31.1	103.33	20.3526	20.7134	17.0296	24.747	1.01772	1.21632	1.45318
MMAR_0565	2680	B2HNY7	>tr|B2HNY7|B2HNY7_MYCMM Conserved membrane protein OS=Mycobacterium marinum (strain ATCC BAA-535 / M) GN=MMAR_0565 PE=4 SV=1	7	7	21.3	24.379	14.9109	23.4256	19.28	19.1199	1.57104	1.21502	0.991696
MMAR_3819	2581	B2HNH6	>tr|B2HNH6|B2HNH6_MYCMM Uncharacterized protein OS=Mycobacterium marinum (strain ATCC BAA-535 / M) GN=MMAR_3819 PE=4 SV=1	2	2	16.2	8.4836	6.44572	10.3332	8.50898	13.9925	1.60312	1.21439	1.64444
MMAR_0708	2887	B2HPZ0	>tr|B2HPZ0|B2HPZ0_MYCMM Beta lactamase-like protein OS=Mycobacterium marinum (strain ATCC BAA-535 / M) GN=MMAR_0708 PE=4 SV=1	9	9	28	26.981	12.9373	14.9715	12.3356	15.4477	1.15723	1.21367	1.25228
MMAR_1744	1409	B2HIJ9	>sp|B2HIJ9|Y1744_MYCMM Uncharacterized oxidoreductase MMAR_1744 OS=Mycobacterium marinum (strain ATCC BAA-535 / M) GN=MMAR_1744 PE=3 SV=1	10	10	43.8	29.76	20.8087	21.6998	17.8852	23.6931	1.04282	1.21328	1.32473
fixB	1361	B2HIE1	>tr|B2HIE1|B2HIE1_MYCMM Electron transfer flavoprotein (Alpha-subunit) FixB OS=Mycobacterium marinum (strain ATCC BAA-535 / M) GN=fixB PE=4 SV=1	13	13	64.8	31.716	32.765	41.4971	34.2058	39.7169	1.26651	1.21316	1.16112
MMAR_1766	1429	B2HIM1	>tr|B2HIM1|B2HIM1_MYCMM Methyltransferase OS=Mycobacterium marinum (strain ATCC BAA-535 / M) GN=MMAR_1766 PE=4 SV=1	22	20	55.9	30.5	80.4752	116.06	95.7669	71.1666	1.44219	1.21191	0.743123
lprC	3262	B2HRC1	>tr|B2HRC1|B2HRC1_MYCMM Lipoprotein LprC OS=Mycobacterium marinum (strain ATCC BAA-535 / M) GN=lprC PE=4 SV=1	11	11	65.1	20.176	20.3411	21.2183	17.5571	19.6086	1.04312	1.20853	1.11685
dacB1	1573	B2HJ68	>tr|B2HJ68|B2HJ68_MYCMM D-alanyl-D-alanine carboxypeptidase DacB1 OS=Mycobacterium marinum (strain ATCC BAA-535 / M) GN=dacB1 PE=4 SV=1	14	14	29.5	46.874	40.7511	37.5404	31.0765	30.9719	0.921213	1.208	0.996634
rplX	5	B2HCT2	>sp|B2HCT2|RL24_MYCMM 50S ribosomal protein L24 OS=Mycobacterium marinum (strain ATCC BAA-535 / M) GN=rplX PE=3 SV=1	16	16	80.4	11.659	11.8989	17.1084	14.1641	22.1287	1.43782	1.20788	1.56231
MMAR_3721	2279	B2HMB7	>tr|B2HMB7|B2HMB7_MYCMM Conserved hypothetical glycosyl hydrolase OS=Mycobacterium marinum (strain ATCC BAA-535 / M) GN=MMAR_3721 PE=4 SV=1	30	30	39.1	77.411	70.2977	64.2536	53.222	36.6535	0.914021	1.20728	0.688691
fadE4	2453	B2HN13	>tr|B2HN13|B2HN13_MYCMM Acyl-CoA dehydrogenase FadE4 OS=Mycobacterium marinum (strain ATCC BAA-535 / M) GN=fadE4 PE=3 SV=1	24	24	41.5	63.922	29.7645	29.9664	24.8296	34.0571	1.00678	1.20688	1.37163
MMAR_1215	271	B2HDV7	>tr|B2HDV7|B2HDV7_MYCMM Conserved protein OS=Mycobacterium marinum (strain ATCC BAA-535 / M) GN=MMAR_1215 PE=4 SV=1	21	21	45.8	48.46	53.5852	69.5969	57.6817	67.6363	1.29881	1.20657	1.17258
pepR	1927	B2HKV4	>tr|B2HKV4|B2HKV4_MYCMM Zinc protease PepR OS=Mycobacterium marinum (strain ATCC BAA-535 / M) GN=pepR PE=3 SV=1	18	18	36.8	47.807	13.861	12.3999	10.2846	5.17108	0.894585	1.20567	0.502797
MMAR_5369	2347	B2HMK4	>tr|B2HMK4|B2HMK4_MYCMM Conserved transmembrane protein OS=Mycobacterium marinum (strain ATCC BAA-535 / M) GN=MMAR_5369 PE=4 SV=1	12	12	20.5	70.109	17.3521	17.5899	14.5977	20.1083	1.01371	1.20498	1.3775
groEL1	67	B2HD10	>tr|B2HD10|B2HD10_MYCMM 60 kDa chaperonin OS=Mycobacterium marinum (strain ATCC BAA-535 / M) GN=groEL1 PE=3 SV=1	32	30	55.5	55.858	96.2411	83.5819	69.3727	73.8176	0.868464	1.20482	1.06407
galE2	3152	B2HQW9	>tr|B2HQW9|B2HQW9_MYCMM UDP-glucose 4-epimerase GalE2 OS=Mycobacterium marinum (strain ATCC BAA-535 / M) GN=galE2 PE=4 SV=1	24	24	61	40.717	54.5548	45.2318	37.6516	31.9821	0.829107	1.20132	0.849422
ndh	3652	B2HSZ6	>tr|B2HSZ6|B2HSZ6_MYCMM NADH dehydrogenase Ndh OS=Mycobacterium marinum (strain ATCC BAA-535 / M) GN=ndh PE=4 SV=1	26	26	37.7	49.686	44.5951	61.4007	51.1182	45.4094	1.37685	1.20115	0.888322
ilvB1_3	2928	B2HQ38	>tr|B2HQ38|B2HQ38_MYCMM Acetolactate synthase (Large subunit) IlvB1_3 OS=Mycobacterium marinum (strain ATCC BAA-535 / M) GN=ilvB1_3 PE=3 SV=1	16	16	30.9	64.629	22.8053	22.2516	18.5298	10.8527	0.975722	1.20085	0.585688
MMAR_2649	3604	B2HSS1	>tr|B2HSS1|B2HSS1_MYCMM Uncharacterized protein OS=Mycobacterium marinum (strain ATCC BAA-535 / M) GN=MMAR_2649 PE=4 SV=1	22	22	49.1	49.861	34.7156	40.828	34.0887	37.175	1.17607	1.1977	1.09054
MMAR_5212	1816	B2HKC0	>tr|B2HKC0|B2HKC0_MYCMM S-adenosyl-L-methionine-dependentmethyltransferase OS=Mycobacterium marinum (strain ATCC BAA-535 / M) GN=MMAR_5212 PE=4 SV=1	13	13	33	35.369	11.9104	10.2394	8.56174	11.8847	0.859709	1.19595	1.38812
ompA	594	B2HF78	>tr|B2HF78|B2HF78_MYCMM Outer membrane protein a OmpA OS=Mycobacterium marinum (strain ATCC BAA-535 / M) GN=ompA PE=3 SV=1	15	15	45.8	34.141	32.24	51.8303	43.3594	39.1517	1.60764	1.19536	0.902959
MMAR_0353	2133	B2HLS1	>tr|B2HLS1|B2HLS1_MYCMM Conserved hypothetical transmembrane protein OS=Mycobacterium marinum (strain ATCC BAA-535 / M) GN=MMAR_0353 PE=4 SV=1	5	5	12.4	48.145	8.90985	11.4369	9.58724	10.82	1.28362	1.19293	1.12858
rpsO	1924	B2HKV0	>sp|B2HKV0|RS15_MYCMM 30S ribosomal protein S15 OS=Mycobacterium marinum (strain ATCC BAA-535 / M) GN=rpsO PE=3 SV=1	19	19	86.5	10.448	34.271	39.9588	33.4968	31.5698	1.16597	1.19291	0.942472
MMAR_1707	1376	B2HIG2	>tr|B2HIG2|B2HIG2_MYCMM Conserved hypothetical membrane protein OS=Mycobacterium marinum (strain ATCC BAA-535 / M) GN=MMAR_1707 PE=4 SV=1	6	6	29.4	29.494	36.7007	34.417	28.8672	25.7681	0.937776	1.19225	0.892641
MMAR_3555	1751	B2HK30	>tr|B2HK30|B2HK30_MYCMM Saccharopine dehydrogenase OS=Mycobacterium marinum (strain ATCC BAA-535 / M) GN=MMAR_3555 PE=4 SV=1	11	11	25.7	44.029	6.43425	4.68512	3.93217	2.58554	0.728154	1.19148	0.657535
MMAR_3449	1495	B2HIW7	>tr|B2HIW7|B2HIW7_MYCMM Hydrolase OS=Mycobacterium marinum (strain ATCC BAA-535 / M) GN=MMAR_3449 PE=4 SV=1	9	9	30	36.255	5.96665	4.03951	3.39304	6.17036	0.677014	1.19053	1.81853
lprQ	3135	B2HQU9	>tr|B2HQU9|B2HQU9_MYCMM Conserved lipoprotein LprQ OS=Mycobacterium marinum (strain ATCC BAA-535 / M) GN=lprQ PE=4 SV=1	8	8	24.7	49.405	10.9178	13.4566	11.3101	9.82068	1.23254	1.18979	0.868308
MMAR_2351	2946	B2HQ57	>tr|B2HQ57|B2HQ57_MYCMM Glycosyl transferase OS=Mycobacterium marinum (strain ATCC BAA-535 / M) GN=MMAR_2351 PE=4 SV=1	10	10	30.5	28.246	20.8317	26.3849	22.1867	12.895	1.26658	1.18922	0.581203
MMAR_5436	2386	B2HMS4	>tr|B2HMS4|B2HMS4_MYCMM Uncharacterized protein OS=Mycobacterium marinum (strain ATCC BAA-535 / M) GN=MMAR_5436 PE=4 SV=1	24	24	55.1	46.671	38.7546	38.6441	32.5356	50.0481	0.99715	1.18775	1.53826
MMAR_0945	3497	B2HSE4	>tr|B2HSE4|B2HSE4_MYCMM Conserved hypothetical membrane protein OS=Mycobacterium marinum (strain ATCC BAA-535 / M) GN=MMAR_0945 PE=4 SV=1	16	16	21.2	81.35	4.97412	7.7382	6.52231	13.4273	1.55569	1.18642	2.05868
MMAR_2234	2737	B2HP79	>tr|B2HP79|B2HP79_MYCMM Uncharacterized protein OS=Mycobacterium marinum (strain ATCC BAA-535 / M) GN=MMAR_2234 PE=4 SV=1	5	5	19.1	29.351	7.94025	11.3431	9.58724	12.9059	1.42856	1.18315	1.34615
MMAR_0087	1590	B2HJ89	>tr|B2HJ89|B2HJ89_MYCMM Uncharacterized protein OS=Mycobacterium marinum (strain ATCC BAA-535 / M) GN=MMAR_0087 PE=4 SV=1	13	13	26	64.134	8.44224	6.75177	5.70782	7.2024	0.79976	1.1829	1.26185
pcaA	3122	B2HQT6	>tr|B2HQT6|B2HQT6_MYCMM Mycolic acid synthase PcaA OS=Mycobacterium marinum (strain ATCC BAA-535 / M) GN=pcaA PE=4 SV=1	16	15	38.7	32.765	35.7196	34.1231	28.8672	41.2595	0.955304	1.18207	1.42928
efp	2544	B2HND2	>sp|B2HND2|EFP_MYCMM Elongation factor P OS=Mycobacterium marinum (strain ATCC BAA-535 / M) GN=efp PE=3 SV=1	4	4	25.1	20.366	5.94372	4.70857	3.98493	3.61757	0.792193	1.1816	0.907814
umaA	3121	B2HQT4	>tr|B2HQT4|B2HQT4_MYCMM Mycolic acid synthase UmaA OS=Mycobacterium marinum (strain ATCC BAA-535 / M) GN=umaA PE=4 SV=1	19	19	55.9	33.039	49.6265	44.3626	37.5461	53.6766	0.893928	1.18155	1.42962
rplI	1347	B2HIC0	>sp|B2HIC0|RL9_MYCMM 50S ribosomal protein L9 OS=Mycobacterium marinum (strain ATCC BAA-535 / M) GN=rplI PE=3 SV=1	10	10	57.9	16.17	11.9562	16.6035	14.0585	11.8302	1.38869	1.18103	0.841493
MMAR_4624	432	B2HEK2	>tr|B2HEK2|B2HEK2_MYCMM Conserved protein OS=Mycobacterium marinum (strain ATCC BAA-535 / M) GN=MMAR_4624 PE=4 SV=1	13	13	43.8	40.494	22.2918	29.4849	24.9878	18.0442	1.32268	1.17997	0.72212
kdpD	2834	B2HPR8	>tr|B2HPR8|B2HPR8_MYCMM Two-component system response phosphate sensor kinase, KdpD OS=Mycobacterium marinum (strain ATCC BAA-535 / M) GN=kdpD PE=4 SV=1	30	30	32.9	89.934	12.9144	21.1714	17.9496	32.4817	1.63937	1.17949	1.80961
ctaC	961	B2HGW8	>tr|B2HGW8|B2HGW8_MYCMM Transmembrane cytochrome C oxidase (Subunit II) CtaC OS=Mycobacterium marinum (strain ATCC BAA-535 / M) GN=ctaC PE=4 SV=1	28	28	54.8	40.701	225.852	267.948	227.322	211.807	1.18639	1.17871	0.931747
MMAR_2078	2238	B2HM64	>tr|B2HM64|B2HM64_MYCMM Methyltransferase OS=Mycobacterium marinum (strain ATCC BAA-535 / M) GN=MMAR_2078 PE=4 SV=1	18	18	71.9	29.223	49.0901	65.4276	55.5252	59.7597	1.33281	1.17834	1.07626
MMAR_2444	3186	B2HR08	>tr|B2HR08|B2HR08_MYCMM Transmembrane serine/threonine-protein kinase OS=Mycobacterium marinum (strain ATCC BAA-535 / M) GN=MMAR_2444 PE=3 SV=1	13	13	30.5	59.8	7.43825	9.82829	8.35072	8.7559	1.32132	1.17694	1.04852
MMAR_2941	515	B2HEW2	>tr|B2HEW2|B2HEW2_MYCMM Membrane-anchored serine/threonine-protein kinase OS=Mycobacterium marinum (strain ATCC BAA-535 / M) GN=MMAR_2941 PE=4 SV=1	26	26	49.7	69.653	63.522	70.4896	59.9026	69.7004	1.10969	1.17674	1.16356
MMAR_2126	2504	B2HN78	>tr|B2HN78|B2HN78_MYCMM Zn-dependent glyoxylase OS=Mycobacterium marinum (strain ATCC BAA-535 / M) GN=MMAR_2126 PE=4 SV=1	13	13	61.6	24.628	12.9144	14.5603	12.3884	12.8731	1.12745	1.17532	1.03913
MMAR_4315	3655	B2HT00	>tr|B2HT00|B2HT00_MYCMM Oxidoreductase OS=Mycobacterium marinum (strain ATCC BAA-535 / M) GN=MMAR_4315 PE=4 SV=1	18	18	40.5	36.207	19.8391	13.2925	11.3101	13.927	0.670015	1.17527	1.23137
pks8	3207	B2HR36	>tr|B2HR36|B2HR36_MYCMM Polyketide synthase, Pks8 OS=Mycobacterium marinum (strain ATCC BAA-535 / M) GN=pks8 PE=4 SV=1	27	21	14.3	220.22	17.3865	9.87519	8.40348	5.65981	0.567981	1.17513	0.673508
MMAR_2502	3226	B2HR67	>tr|B2HR67|B2HR67_MYCMM Conserved hypothetical membrane protein OS=Mycobacterium marinum (strain ATCC BAA-535 / M) GN=MMAR_2502 PE=4 SV=1	21	21	41.7	42.39	61.0349	68.3995	58.2209	60.8572	1.12066	1.17483	1.04528
MMAR_3451	1496	B2HIW9	>tr|B2HIW9|B2HIW9_MYCMM Uncharacterized protein OS=Mycobacterium marinum (strain ATCC BAA-535 / M) GN=MMAR_3451 PE=4 SV=1	11	11	40.3	32.338	6.45718	4.61478	3.93217	8.24535	0.714675	1.1736	2.09689
cstA	1082	B2HHD5	>tr|B2HHD5|B2HHD5_MYCMM Carbon starvation protein, CstA OS=Mycobacterium marinum (strain ATCC BAA-535 / M) GN=cstA PE=4 SV=1	13	13	24.7	80.5	19.8621	21.6763	18.4771	30.4941	1.09134	1.17315	1.65037
sigD	72	B2HD19	>tr|B2HD19|B2HD19_MYCMM RNA polymerase sigma factor OS=Mycobacterium marinum (strain ATCC BAA-535 / M) GN=sigD PE=3 SV=1	11	11	55.3	21.255	10.9178	11.8715	10.1264	15.4477	1.08735	1.17233	1.5255
ruvA	2490	B2HN62	>sp|B2HN62|RUVA_MYCMM Holliday junction ATP-dependent DNA helicase RuvA OS=Mycobacterium marinum (strain ATCC BAA-535 / M) GN=ruvA PE=3 SV=1	8	8	50.8	20.272	5.94372	2.01975	1.7229	2.55279	0.339813	1.1723	1.48168
clpC1	1553	B2HJ41	>tr|B2HJ41|B2HJ41_MYCMM ATP-dependent protease ATP-binding subunit ClpC1 OS=Mycobacterium marinum (strain ATCC BAA-535 / M) GN=clpC1 PE=4 SV=1	61	58	51.1	93.733	139.035	148.634	126.855	174.261	1.06905	1.17169	1.3737
rplM	52	B2HCZ0	>sp|B2HCZ0|RL13_MYCMM 50S ribosomal protein L13 OS=Mycobacterium marinum (strain ATCC BAA-535 / M) GN=rplM PE=3 SV=1	14	14	81	16.181	34.75	37.8453	32.313	35.1	1.08907	1.17121	1.08625
drrA	1434	B2HIM6	>tr|B2HIM6|B2HIM6_MYCMM Daunorubicin-DIM-transport ATP-binding protein ABC transporter DrrA OS=Mycobacterium marinum (strain ATCC BAA-535 / M) GN=drrA PE=3 SV=1	25	25	52	35.728	78.3297	80.7164	68.9391	57.8047	1.03047	1.17084	0.83849
MMAR_2417	3163	B2HQY1	>tr|B2HQY1|B2HQY1_MYCMM Conserved hypothetical membrane protein OS=Mycobacterium marinum (strain ATCC BAA-535 / M) GN=MMAR_2417 PE=4 SV=1	5	5	18.3	13.813	5.93225	7.18637	6.14145	6.71367	1.21141	1.17014	1.09317
pks13	2342	B2HMJ9	>tr|B2HMJ9|B2HMJ9_MYCMM Polyketide synthase Pks13 OS=Mycobacterium marinum (strain ATCC BAA-535 / M) GN=pks13 PE=4 SV=1	74	74	41.7	191.47	156.261	155.045	132.657	146.114	0.992224	1.16877	1.10145
MMAR_1876	1684	B2HJT9	>tr|B2HJT9|B2HJT9_MYCMM Long-chain acyl-CoA synthetase OS=Mycobacterium marinum (strain ATCC BAA-535 / M) GN=MMAR_1876 PE=4 SV=1	19	19	21.4	108.53	10.4273	8.29003	7.1142	3.0961	0.795031	1.16528	0.4352
MMAR_0419	2407	B2HMU7	>tr|B2HMU7|B2HMU7_MYCMM Conserved Mce associated transmembrane protein OS=Mycobacterium marinum (strain ATCC BAA-535 / M) GN=MMAR_0419 PE=4 SV=1	16	16	41.6	36.34	29.7645	38.902	33.3913	30.9937	1.307	1.16503	0.928198
MMAR_2018	2189	B2HM04	>tr|B2HM04|B2HM04_MYCMM Uncharacterized protein OS=Mycobacterium marinum (strain ATCC BAA-535 / M) GN=MMAR_2018 PE=4 SV=1	19	19	64	26.285	41.6978	48.7303	41.8475	51.0474	1.16866	1.16447	1.21984
mmpS3	960	B2HGW6	>tr|B2HGW6|B2HGW6_MYCMM Conserved membrane protein MmpS3 OS=Mycobacterium marinum (strain ATCC BAA-535 / M) GN=mmpS3 PE=4 SV=1	6	6	16.5	32.739	12.4238	14.4431	12.4412	14.9918	1.16253	1.16091	1.20501
MMAR_2122	2500	B2HN74	>tr|B2HN74|B2HN74_MYCMM ABC-type dipeptide transport system, periplasmic component OS=Mycobacterium marinum (strain ATCC BAA-535 / M) GN=MMAR_2122 PE=4 SV=1	24	24	43.3	59.605	32.2515	32.5145	28.0116	24.2801	1.00815	1.16075	0.866786
dnaK	2835	B2HPS1	>sp|B2HPS1|DNAK_MYCMM Chaperone protein DnaK OS=Mycobacterium marinum (strain ATCC BAA-535 / M) GN=dnaK PE=3 SV=1	33	33	39.7	66.364	55.5703	68.0352	58.7072	63.4646	1.22431	1.15889	1.08103
trpB	3160	B2HQX8	>tr|B2HQX8|B2HQX8_MYCMM Tryptophan synthase beta chain OS=Mycobacterium marinum (strain ATCC BAA-535 / M) GN=trpB PE=3 SV=1	11	11	36.2	45.135	6.45718	4.61478	3.98493	7.2024	0.714675	1.15806	1.80741
secA2	3630	B2HSW7	>tr|B2HSW7|B2HSW7_MYCMM Protein translocase subunit SecA OS=Mycobacterium marinum (strain ATCC BAA-535 / M) GN=secA2 PE=3 SV=1	43	43	45.2	87.922	59.655	84.7091	73.211	128.461	1.41998	1.15705	1.75467
rsmI	201	B2HDL2	>tr|B2HDL2|B2HDL2_MYCMM Ribosomal RNA small subunit methyltransferase I OS=Mycobacterium marinum (strain ATCC BAA-535 / M) GN=rsmI PE=3 SV=1	15	15	46.8	29.705	6.94771	8.29003	7.16695	30.4068	1.1932	1.1567	4.24263
accD5	437	B2HEK7	>tr|B2HEK7|B2HEK7_MYCMM Propionyl-CoA carboxylase beta chain 5 AccD5 OS=Mycobacterium marinum (strain ATCC BAA-535 / M) GN=accD5 PE=4 SV=1	28	28	54.4	58.939	80.8282	67.6475	58.6017	57.3269	0.836929	1.15436	0.978247
MMAR_4943	1202	B2HHU7	>tr|B2HHU7|B2HHU7_MYCMM Conserved membrane protein OS=Mycobacterium marinum (strain ATCC BAA-535 / M) GN=MMAR_4943 PE=4 SV=1	10	10	45	24.806	14.9109	17.4727	15.1368	14.4266	1.17181	1.15432	0.953083
rlmN	1664	B2HJP3	>sp|B2HJP3|RLMN_MYCMM Probable dual-specificity RNA methyltransferase RlmN OS=Mycobacterium marinum (strain ATCC BAA-535 / M) GN=rlmN PE=3 SV=1	13	13	32.7	39.699	12.9258	9.25302	8.02261	8.76682	0.715855	1.15337	1.09276
MMAR_5024	1270	B2HI28	>tr|B2HI28|B2HI28_MYCMM Conserved hypothetical dehydrogenase OS=Mycobacterium marinum (strain ATCC BAA-535 / M) GN=MMAR_5024 PE=4 SV=1	24	24	42.3	61.437	28.8063	33.0429	28.6562	28.8533	1.14707	1.15308	1.00688
ctaB	2754	B2HPA0	>tr|B2HPA0|B2HPA0_MYCMM Protoheme IX farnesyltransferase OS=Mycobacterium marinum (strain ATCC BAA-535 / M) GN=ctaB PE=3 SV=1	2	2	9.6	34.72	6.44572	7.76165	6.73333	6.69184	1.20416	1.15272	0.993838
desA1	986	B2HH05	>tr|B2HH05|B2HH05_MYCMM Acyl-[acyl-carrier protein] desaturase DesA1 OS=Mycobacterium marinum (strain ATCC BAA-535 / M) GN=desA1 PE=4 SV=1	25	24	60.7	38.944	40.6708	23.5789	20.4638	24.7579	0.579749	1.15223	1.20984
MMAR_1067	22	B2HCV1	>tr|B2HCV1|B2HCV1_MYCMM Conserved protein OS=Mycobacterium marinum (strain ATCC BAA-535 / M) GN=MMAR_1067 PE=4 SV=1	11	11	37.6	23.74	10.9178	14.49	12.5994	11.8629	1.32718	1.15005	0.941545
asnB	962	B2HGW9	>tr|B2HGW9|B2HGW9_MYCMM Asparagine synthetase OS=Mycobacterium marinum (strain ATCC BAA-535 / M) GN=asnB PE=4 SV=1	19	19	34.5	73.644	39.1878	37.2231	32.4301	34.0134	0.949865	1.14779	1.04882
glfT	2350	B2HMK7	>tr|B2HMK7|B2HMK7_MYCMM Bifunctional UDP-galactofuranosyl transferase GlfT OS=Mycobacterium marinum (strain ATCC BAA-535 / M) GN=glfT PE=4 SV=1	41	41	60.3	70.89	124.795	119.725	104.329	88.146	0.959371	1.14757	0.844888
ctpA	1884	B2HKM7	>tr|B2HKM7|B2HKM7_MYCMM Cation transporter p-type ATPase a CtpA OS=Mycobacterium marinum (strain ATCC BAA-535 / M) GN=ctpA PE=3 SV=1	19	19	29	78.801	15.869	16.5097	14.3867	17.0449	1.04037	1.14757	1.18477
tpx	318	B2HE20	>tr|B2HE20|B2HE20_MYCMM Probable thiol peroxidase OS=Mycobacterium marinum (strain ATCC BAA-535 / M) GN=tpx PE=3 SV=1	6	6	29.1	16.938	9.42331	7.78509	6.78608	6.71367	0.826153	1.14721	0.989329
MMAR_5253	2036	B2HLC6	>tr|B2HLC6|B2HLC6_MYCMM Conserved protein OS=Mycobacterium marinum (strain ATCC BAA-535 / M) GN=MMAR_5253 PE=4 SV=1	16	16	70.9	14.527	8.94424	16.122	14.0585	13.8833	1.8025	1.14678	0.987536
cpsA	1222	B2HHX0	>tr|B2HHX0|B2HHX0_MYCMM Conserved hypothetical membrane protein CpsA OS=Mycobacterium marinum (strain ATCC BAA-535 / M) GN=cpsA PE=4 SV=1	10	10	21.5	54.562	9.91384	10.3098	8.99536	5.14925	1.03994	1.14612	0.572434
cyp138B1	159	B2HDF3	>tr|B2HDF3|B2HDF3_MYCMM Cytochrome P450 138B1 Cyp138B1 OS=Mycobacterium marinum (strain ATCC BAA-535 / M) GN=cyp138B1 PE=3 SV=1	21	21	50.4	50.371	31.7381	22.7097	19.8191	17.5336	0.715534	1.14585	0.884683
MMAR_3448	1494	B2HIW6	>tr|B2HIW6|B2HIW6_MYCMM Uncharacterized protein OS=Mycobacterium marinum (strain ATCC BAA-535 / M) GN=MMAR_3448 PE=4 SV=1	17	17	44.1	47.182	49.6953	53.7094	46.9107	47.995	1.08077	1.14493	1.02311
pntB	2153	B2HLU7	>tr|B2HLU7|B2HLU7_MYCMM NAD(P) transhydrogenase subunit beta OS=Mycobacterium marinum (strain ATCC BAA-535 / M) GN=pntB PE=3 SV=1	14	14	25.7	48.371	67.5379	75.961	66.3606	70.6888	1.12472	1.14467	1.06522
MMAR_2322	2920	B2HQ28	>tr|B2HQ28|B2HQ28_MYCMM Uncharacterized protein OS=Mycobacterium marinum (strain ATCC BAA-535 / M) GN=MMAR_2322 PE=4 SV=1	8	8	47.4	23.665	5.95518	5.67155	4.95768	2.06407	0.952373	1.14399	0.416337
tsf	1658	B2HJN3	>sp|B2HJN3|EFTS_MYCMM Elongation factor Ts OS=Mycobacterium marinum (strain ATCC BAA-535 / M) GN=tsf PE=3 SV=1	25	25	67.5	28.517	32.7535	27.0431	23.6458	35.0236	0.825655	1.14367	1.48118
MMAR_1808	1650	B2HJM1	>tr|B2HJM1|B2HJM1_MYCMM Uncharacterized protein OS=Mycobacterium marinum (strain ATCC BAA-535 / M) GN=MMAR_1808 PE=4 SV=1	8	8	33.7	27.666	7.43825	7.69131	6.73333	6.71367	1.03402	1.14227	0.99708
fadE20	1969	B2HL18	>tr|B2HL18|B2HL18_MYCMM Acyl-CoA dehydrogenase FadE20 OS=Mycobacterium marinum (strain ATCC BAA-535 / M) GN=fadE20 PE=3 SV=1	10	9	29.3	43.066	6.95918	7.69131	6.73333	12.3735	1.1052	1.14227	1.83765
fabG4	2464	B2HN28	>tr|B2HN28|B2HN28_MYCMM 3-oxoacyl-[acyl-carrier protein] reductase FabG4 OS=Mycobacterium marinum (strain ATCC BAA-535 / M) GN=fabG4 PE=3 SV=1	29	29	57.3	46.8	85.2659	75.8437	66.4017	63.4536	0.889497	1.1422	0.955602
hbhA	3126	B2HQU0	>tr|B2HQU0|B2HQU0_MYCMM Iron-regulated heparin binding hemagglutinin HbhA OS=Mycobacterium marinum (strain ATCC BAA-535 / M) GN=hbhA PE=4 SV=1	21	21	47.3	21.886	55.5473	57.8895	50.6846	45.3985	1.04217	1.14215	0.895706
MMAR_1080	35	B2HCW4	>tr|B2HCW4|B2HCW4_MYCMM Transmembrane carbohydrate transport protein OS=Mycobacterium marinum (strain ATCC BAA-535 / M) GN=MMAR_1080 PE=4 SV=1	4	4	10.4	53.971	7.43825	5.16662	4.52406	8.78865	0.694601	1.14203	1.94265
MMAR_1646	1102	B2HHG4	>tr|B2HHG4|B2HHG4_MYCMM Uncharacterized protein OS=Mycobacterium marinum (strain ATCC BAA-535 / M) GN=MMAR_1646 PE=4 SV=1	5	5	33.8	16.331	6.97065	5.16662	4.52406	5.17108	0.741196	1.14203	1.14302
fadD15	950	B2HGV4	>sp|B2HGV4|FAC15_MYCMM Long-chain-fatty-acid--CoA ligase FadD15 OS=Mycobacterium marinum (strain ATCC BAA-535 / M) GN=fadD15 PE=3 SV=1	37	34	59.8	64.75	111.163	116.812	102.342	111.992	1.05082	1.14139	1.09429
MMAR_5271	2046	B2HLE3	>tr|B2HLE3|B2HLE3_MYCMM Uncharacterized protein OS=Mycobacterium marinum (strain ATCC BAA-535 / M) GN=MMAR_5271 PE=4 SV=1	31	30	73.3	48.959	69.9333	79.4955	69.7536	65.5941	1.13673	1.13966	0.940369
phoS3	993	B2HH12	>tr|B2HH12|B2HH12_MYCMM Phosphate-binding protein 3, PhoS3 OS=Mycobacterium marinum (strain ATCC BAA-535 / M) GN=phoS3 PE=4 SV=1	11	11	33.4	37.608	11.3969	13.5035	11.8493	17.0449	1.18484	1.13961	1.43848
ephD	974	B2HGY3	>tr|B2HGY3|B2HGY3_MYCMM Short-chain dehydrogenase EphD OS=Mycobacterium marinum (strain ATCC BAA-535 / M) GN=ephD PE=3 SV=1	27	27	48.8	63.928	96.1035	91.8016	80.6301	69.2008	0.955237	1.13855	0.85825
MMAR_0441	2426	B2HMW9	>tr|B2HMW9|B2HMW9_MYCMM Uncharacterized protein OS=Mycobacterium marinum (strain ATCC BAA-535 / M) GN=MMAR_0441 PE=4 SV=1	9	9	47.5	19.779	8.93278	10.3567	9.10087	7.2024	1.1594	1.13799	0.791397
topA	1583	B2HJ79	>tr|B2HJ79|B2HJ79_MYCMM DNA topoisomerase OS=Mycobacterium marinum (strain ATCC BAA-535 / M) GN=topA PE=3 SV=1	51	51	53.9	102.19	56.5742	58.3945	51.3408	60.3685	1.03217	1.13739	1.17584
metK	2712	B2HP50	>sp|B2HP50|METK_MYCMM S-adenosylmethionine synthase OS=Mycobacterium marinum (strain ATCC BAA-535 / M) GN=metK PE=1 SV=1	24	24	63	43.082	32.7306	33.5009	29.4591	31.4606	1.02354	1.1372	1.06794
MMAR_3827	2588	B2HNI4	>tr|B2HNI4|B2HNI4_MYCMM Conserved protein OS=Mycobacterium marinum (strain ATCC BAA-535 / M) GN=MMAR_3827 PE=4 SV=1	5	5	29.1	23.877	5.95518	5.14317	4.52406	3.60666	0.863646	1.13685	0.797217
MMAR_5485	2640	B2HNT6	>tr|B2HNT6|B2HNT6_MYCMM Conserved transmembrane protein OS=Mycobacterium marinum (strain ATCC BAA-535 / M) GN=MMAR_5485 PE=3 SV=1	10	10	31.5	41.312	40.6938	60.0969	52.9351	50.5696	1.47681	1.13529	0.955314
gadB	60	B2HD02	>tr|B2HD02|B2HD02_MYCMM Glutamate decarboxylase, GadB OS=Mycobacterium marinum (strain ATCC BAA-535 / M) GN=gadB PE=3 SV=1	13	13	28.6	51.027	12.9258	10.932	9.64	14.4703	0.845745	1.13402	1.50107
rpoB	3540	B2HSJ3	>sp|B2HSJ3|RPOB_MYCMM DNA-directed RNA polymerase subunit beta OS=Mycobacterium marinum (strain ATCC BAA-535 / M) GN=rpoB PE=3 SV=1	67	67	47.5	129.55	156.18	141.131	124.487	133.697	0.90364	1.13369	1.07398
MMAR_1112	55	B2HCZ6	>tr|B2HCZ6|B2HCZ6_MYCMM Conserved protein OS=Mycobacterium marinum (strain ATCC BAA-535 / M) GN=MMAR_1112 PE=4 SV=1	16	16	45.2	28.829	21.8701	21.1714	18.6881	35.0018	0.968054	1.13288	1.87294
MMAR_4335	3670	B2HT21	>tr|B2HT21|B2HT21_MYCMM Transcriptional regulatory protein (Probably TetR-family) OS=Mycobacterium marinum (strain ATCC BAA-535 / M) GN=MMAR_4335 PE=4 SV=1	11	11	32.3	21.721	13.884	20.1381	17.7797	22.1396	1.45046	1.13264	1.24522
lpd	3114	B2HQS5	>tr|B2HQS5|B2HQS5_MYCMM Dihydrolipoyl dehydrogenase OS=Mycobacterium marinum (strain ATCC BAA-535 / M) GN=lpd PE=3 SV=1	23	23	49	49.593	22.8397	21.6998	19.1745	19.6414	0.950092	1.1317	1.02435
sthA	2174	B2HLY6	>tr|B2HLY6|B2HLY6_MYCMM Soluble pyridine nucleotide transhydrogenase SthA OS=Mycobacterium marinum (strain ATCC BAA-535 / M) GN=sthA PE=4 SV=1	17	17	43.9	50.928	8.90985	7.78509	6.89159	13.927	0.873763	1.12965	2.02087
MMAR_3227	946	B2HGV0	>tr|B2HGV0|B2HGV0_MYCMM Uncharacterized protein OS=Mycobacterium marinum (strain ATCC BAA-535 / M) GN=MMAR_3227 PE=4 SV=1	8	8	59.7	13.152	7.96318	10.8616	9.64	5.10558	1.36398	1.12672	0.529625
MMAR_1683	1359	B2HID9	>tr|B2HID9|B2HID9_MYCMM Uncharacterized protein OS=Mycobacterium marinum (strain ATCC BAA-535 / M) GN=MMAR_1683 PE=4 SV=1	7	7	22.1	29.883	6.44572	2.54814	2.26203	2.58554	0.395323	1.12648	1.14302
MMAR_3074	727	B2HFU5	>tr|B2HFU5|B2HFU5_MYCMM Uncharacterized protein OS=Mycobacterium marinum (strain ATCC BAA-535 / M) GN=MMAR_3074 PE=4 SV=1	19	19	33.9	80.41	17.8541	23.2849	20.6864	24.7688	1.30418	1.12562	1.19735
der	3387	B2HRU9	>sp|B2HRU9|DER_MYCMM GTPase Der OS=Mycobacterium marinum (strain ATCC BAA-535 / M) GN=der PE=3 SV=1	15	15	34.1	50.87	11.4313	8.84186	7.86434	10.8091	0.773478	1.1243	1.37444
MMAR_4359	3682	B2HT45	>tr|B2HT45|B2HT45_MYCMM Cholesterol dehydrogenase OS=Mycobacterium marinum (strain ATCC BAA-535 / M) GN=MMAR_4359 PE=4 SV=1	9	9	16.5	39.953	7.44971	5.14317	4.57681	7.22423	0.690385	1.12375	1.57844
echA8	3714	B2HT82	>tr|B2HT82|B2HT82_MYCMM Enoyl-CoA hydratase EchA8 OS=Mycobacterium marinum (strain ATCC BAA-535 / M) GN=echA8 PE=3 SV=1	13	13	43.2	27.153	11.3969	11.3666	10.1264	11.8847	0.997337	1.12247	1.17364
fadE25	443	B2HEL3	>tr|B2HEL3|B2HEL3_MYCMM Acyl-CoA dehydrogenase FadE25 OS=Mycobacterium marinum (strain ATCC BAA-535 / M) GN=fadE25 PE=3 SV=1	17	17	43.2	41.509	28.8063	27.8997	24.8823	38.6849	0.968528	1.12127	1.55471
mce3R	324	B2HE33	>tr|B2HE33|B2HE33_MYCMM Transcriptional repressor (Probably TetR-family) Mce3R OS=Mycobacterium marinum (strain ATCC BAA-535 / M) GN=mce3R PE=4 SV=1	15	15	40.8	43.985	7.44971	5.67155	5.06319	7.24606	0.761312	1.12016	1.43113
MMAR_5132	1577	B2HJ73	>tr|B2HJ73|B2HJ73_MYCMM Conserved hypothetical membrane protein OS=Mycobacterium marinum (strain ATCC BAA-535 / M) GN=MMAR_5132 PE=4 SV=1	2	2	17.7	13.001	5.96665	5.67155	5.06319	5.70347	0.950543	1.12016	1.12646
nuoJ	835	B2HGD9	>tr|B2HGD9|B2HGD9_MYCMM NADH dehydrogenase I (Chain J) NuoJ (NADH-ubiquinone oxidoreductase chain J) OS=Mycobacterium marinum (strain ATCC BAA-535 / M) GN=nuoJ PE=3 SV=1	3	3	24	27.274	20.8317	21.5826	19.28	16.4907	1.03604	1.11943	0.855327
MMAR_2454	3192	B2HR18	>tr|B2HR18|B2HR18_MYCMM Uncharacterized protein OS=Mycobacterium marinum (strain ATCC BAA-535 / M) GN=MMAR_2454 PE=4 SV=1	15	15	42.5	33.639	19.3601	13.8678	12.3884	13.9052	0.716309	1.11942	1.12243
putA_1	3111	B2HQS0	>tr|B2HQS0|B2HQS0_MYCMM Aldehyde dehydrogenase, PutA_1 OS=Mycobacterium marinum (strain ATCC BAA-535 / M) GN=putA_1 PE=3 SV=1	17	17	41.4	54.676	20.3411	17.0616	15.2423	25.7681	0.838771	1.11935	1.69056
amiB2	3281	B2HRF2	>tr|B2HRF2|B2HRF2_MYCMM Amidase AmiB2 OS=Mycobacterium marinum (strain ATCC BAA-535 / M) GN=amiB2 PE=4 SV=1	18	17	42	49.318	17.8426	17.1788	15.3478	17.0012	0.962795	1.1193	1.10773
lprB	3263	B2HRC2	>tr|B2HRC2|B2HRC2_MYCMM Lipoprotein LprB OS=Mycobacterium marinum (strain ATCC BAA-535 / M) GN=lprB PE=4 SV=1	2	2	16.2	19.546	7.90585	5.71845	5.11594	6.15945	0.723318	1.11777	1.20397
lhr	288	B2HDY0	>tr|B2HDY0|B2HDY0_MYCMM ATP-dependent helicase Lhr OS=Mycobacterium marinum (strain ATCC BAA-535 / M) GN=lhr PE=4 SV=1	34	34	24.6	164.3	19.8391	15.5936	13.953	14.4048	0.786003	1.11758	1.03238
MMAR_0418	2406	B2HMU6	>tr|B2HMU6|B2HMU6_MYCMM Conserved Mce associated membrane protein OS=Mycobacterium marinum (strain ATCC BAA-535 / M) GN=MMAR_0418 PE=4 SV=1	15	14	47.3	23.923	35.252	33.6182	30.1038	26.366	0.953652	1.11674	0.875836
MMAR_2412	3158	B2HQX6	>tr|B2HQX6|B2HQX6_MYCMM Conserved hypothetical membrane protein OS=Mycobacterium marinum (strain ATCC BAA-535 / M) GN=MMAR_2412 PE=4 SV=1	4	4	26	22.225	10.4388	11.3666	10.1791	8.76682	1.08888	1.11665	0.861255
trxB2	2633	B2HNS8	>tr|B2HNS8|B2HNS8_MYCMM Thioredoxin reductase OS=Mycobacterium marinum (strain ATCC BAA-535 / M) GN=trxB2 PE=3 SV=1	13	13	46.7	35.238	10.4273	8.1728	7.32521	9.80977	0.783788	1.11571	1.33918
panC	1558	B2HJ46	>tr|B2HJ46|B2HJ46_MYCMM Pantothenate synthetase OS=Mycobacterium marinum (strain ATCC BAA-535 / M) GN=panC PE=3 SV=1	6	6	23.2	33.318	5.44172	5.64811	5.06319	6.71367	1.03793	1.11552	1.32598
acrA1	225	B2HDP5	>tr|B2HDP5|B2HDP5_MYCMM Short-chain dehydrogenase, AcrA1 OS=Mycobacterium marinum (strain ATCC BAA-535 / M) GN=acrA1 PE=3 SV=1	26	26	39.4	73.125	14.888	21.148	18.9635	18.0005	1.42047	1.11519	0.949221
rpsH	8	B2HCT5	>sp|B2HCT5|RS8_MYCMM 30S ribosomal protein S8 OS=Mycobacterium marinum (strain ATCC BAA-535 / M) GN=rpsH PE=3 SV=1	15	15	66.7	14.392	40.1803	41.1093	36.8898	51.8309	1.02312	1.11438	1.40502
MMAR_1174	240	B2HDR6	>tr|B2HDR6|B2HDR6_MYCMM Conserved transmembrane ATP-binding protein ABC transporter OS=Mycobacterium marinum (strain ATCC BAA-535 / M) GN=MMAR_1174 PE=4 SV=1	20	19	31.8	93.419	16.8845	23.8133	21.3838	30.4286	1.41037	1.11362	1.42298
cyp136B2	772	B2HG05	>tr|B2HG05|B2HG05_MYCMM Cytochrome P450 136B2 Cyp136B2 OS=Mycobacterium marinum (strain ATCC BAA-535 / M) GN=cyp136B2 PE=3 SV=1	30	30	49.7	54.713	50.0941	38.8317	34.9032	31.9712	0.775174	1.11255	0.915996
pstB	1228	B2HHX8	>tr|B2HHX8|B2HHX8_MYCMM Phosphate-transport ATP-binding protein ABC transporter PstB OS=Mycobacterium marinum (strain ATCC BAA-535 / M) GN=pstB PE=3 SV=1	8	8	38.1	24.211	7.43825	8.74808	7.86434	8.7559	1.17609	1.11237	1.11337
rpiB	2577	B2HNH0	>tr|B2HNH0|B2HNH0_MYCMM Ribose/galactose isomerase RpiB OS=Mycobacterium marinum (strain ATCC BAA-535 / M) GN=rpiB PE=4 SV=1	9	9	62.9	17.024	5.95518	8.79497	7.9171	8.22351	1.47686	1.11088	1.0387
fusA2	2107	B2HLN9	>tr|B2HLN9|B2HLN9_MYCMM Elongation factor G FusA2 OS=Mycobacterium marinum (strain ATCC BAA-535 / M) GN=fusA2 PE=4 SV=1	18	18	26.5	75.923	3.99305	6.22339	5.60232	14.4375	1.55855	1.11086	2.57707
sepF	917	B2HGR0	>sp|B2HGR0|SEPF_MYCMM Cell division protein SepF OS=Mycobacterium marinum (strain ATCC BAA-535 / M) GN=sepF PE=3 SV=1	18	18	72.6	25.701	22.3491	18.1183	16.3206	23.6713	0.810695	1.11015	1.45039
prsA	183	B2HDJ1	>tr|B2HDJ1|B2HDJ1_MYCMM Ribose-phosphate pyrophosphokinase OS=Mycobacterium marinum (strain ATCC BAA-535 / M) GN=prsA PE=3 SV=1	15	15	36.8	35.493	23.8551	14.3493	12.9275	15.991	0.601518	1.10998	1.23698
fadD2	2650	B2HNV0	>tr|B2HNV0|B2HNV0_MYCMM Fatty-acid-CoA ligase FadD2 OS=Mycobacterium marinum (strain ATCC BAA-535 / M) GN=fadD2 PE=4 SV=1	35	35	50.6	60.259	59.5289	54.355	49.0145	61.8892	0.913085	1.10896	1.26267
ftsZ	920	B2HGR3	>tr|B2HGR3|B2HGR3_MYCMM Cell division protein FtsZ OS=Mycobacterium marinum (strain ATCC BAA-535 / M) GN=ftsZ PE=3 SV=1	19	19	47.2	39.193	40.6823	45.8539	41.3611	53.7094	1.12712	1.10862	1.29855
MMAR_5395	2367	B2HMN0	>tr|B2HMN0|B2HMN0_MYCMM Conserved hypothetical transmembrane protein OS=Mycobacterium marinum (strain ATCC BAA-535 / M) GN=MMAR_5395 PE=4 SV=1	13	13	35.9	38.629	35.275	37.2231	33.6023	35.1219	1.05523	1.10775	1.04522
mmaA3	3526	B2HSH6	>tr|B2HSH6|B2HSH6_MYCMM Methoxy mycolic acid synthase 3, MmaA3 OS=Mycobacterium marinum (strain ATCC BAA-535 / M) GN=mmaA3 PE=4 SV=1	15	14	41.6	33.685	26.7983	16.8974	15.2951	21.173	0.63054	1.10476	1.38431
MMAR_2700	3632	B2HSW9	>tr|B2HSW9|B2HSW9_MYCMM Uncharacterized protein OS=Mycobacterium marinum (strain ATCC BAA-535 / M) GN=MMAR_2700 PE=4 SV=1	15	15	51.6	31.688	19.8162	19.9271	18.0435	13.8833	1.00559	1.10439	0.769437
MMAR_5473	2630	B2HNS4	>tr|B2HNS4|B2HNS4_MYCMM Conserved hypothetical secreted protein OS=Mycobacterium marinum (strain ATCC BAA-535 / M) GN=MMAR_5473 PE=4 SV=1	21	21	29.6	83.527	32.8108	41.4267	37.6516	32.0694	1.26259	1.10026	0.851742
drrB	1433	B2HIM5	>tr|B2HIM5|B2HIM5_MYCMM Daunorubicin-DIM-transport integral membrane protein ABC transporter DrrB OS=Mycobacterium marinum (strain ATCC BAA-535 / M) GN=drrB PE=4 SV=1	6	6	16.6	30.971	18.3676	17.5899	15.9925	15.9583	0.957664	1.09989	0.997864
MMAR_3024	565	B2HF43	>tr|B2HF43|B2HF43_MYCMM Conserved membrane protein OS=Mycobacterium marinum (strain ATCC BAA-535 / M) GN=MMAR_3024 PE=4 SV=1	38	38	44.6	93.972	64.5489	68.7043	62.4811	70.7324	1.06438	1.0996	1.13206
yrbE1A	2398	B2HMT8	>tr|B2HMT8|B2HMT8_MYCMM Conserved hypothetical integral membrane protein YrbE1A OS=Mycobacterium marinum (strain ATCC BAA-535 / M) GN=yrbE1A PE=4 SV=1	2	2	12	27.996	8.40785	12.4233	11.3101	10.8418	1.47759	1.09842	0.958591
corA_1	283	B2HDX2	>tr|B2HDX2|B2HDX2_MYCMM Magnesium and cobalt transport transmembrane protein CorA_1 OS=Mycobacterium marinum (strain ATCC BAA-535 / M) GN=corA_1 PE=4 SV=1	7	7	17.8	37.415	5.45319	3.07652	2.80116	3.60666	0.56417	1.0983	1.28756
lpqI	2461	B2HN24	>tr|B2HN24|B2HN24_MYCMM Conserved lipoprotein LpqI OS=Mycobacterium marinum (strain ATCC BAA-535 / M) GN=lpqI PE=4 SV=1	17	17	40.1	40.715	25.8058	30.3306	27.6307	35.5888	1.17534	1.09771	1.28801
mmpL7	1427	B2HIL9	>tr|B2HIL9|B2HIL9_MYCMM Conserved transmembrane transport protein MmpL7 OS=Mycobacterium marinum (strain ATCC BAA-535 / M) GN=mmpL7 PE=4 SV=1	29	29	35.3	93.184	60.0882	68.1524	62.1003	59.8797	1.13421	1.09746	0.964243
icl	3119	B2HQT2	>tr|B2HQT2|B2HQT2_MYCMM Isocitrate lyase Icl OS=Mycobacterium marinum (strain ATCC BAA-535 / M) GN=icl PE=4 SV=1	23	23	47	47.284	42.0966	39.2194	35.7588	43.9105	0.931653	1.09677	1.22796
MMAR_0969	3518	B2HSG7	>tr|B2HSG7|B2HSG7_MYCMM Conserved protein OS=Mycobacterium marinum (strain ATCC BAA-535 / M) GN=MMAR_0969 PE=4 SV=1	12	12	47.2	14.948	16.896	16.0517	14.6504	19.0653	0.950031	1.09565	1.30135
MMAR_4434	163	B2HDF7	>tr|B2HDF7|B2HDF7_MYCMM Hypothetical membrane protein OS=Mycobacterium marinum (strain ATCC BAA-535 / M) GN=MMAR_4434 PE=4 SV=1	4	4	18.6	17.667	11.4084	6.72832	6.14145	6.71367	0.589771	1.09556	1.09317
psd	3087	B2HQP4	>sp|B2HQP4|PSD_MYCMM Phosphatidylserine decarboxylase proenzyme OS=Mycobacterium marinum (strain ATCC BAA-535 / M) GN=psd PE=3 SV=1	17	17	54.6	25.179	31.7151	32.033	29.3009	26.7564	1.01002	1.09324	0.913162
fadE17_1	2292	B2HMD3	>tr|B2HMD3|B2HMD3_MYCMM Acyl-CoA dehydrogenase FadE17_1 OS=Mycobacterium marinum (strain ATCC BAA-535 / M) GN=fadE17_1 PE=3 SV=1	13	13	36.9	42.525	7.41532	8.65429	7.9171	16.5344	1.16708	1.09311	2.08844
asd	1825	B2HKC9	>tr|B2HKC9|B2HKC9_MYCMM Aspartate-semialdehyde dehydrogenase OS=Mycobacterium marinum (strain ATCC BAA-535 / M) GN=asd PE=3 SV=1	18	18	54	36.792	23.7978	27.1838	24.8823	47.4298	1.14228	1.09249	1.90617
helY	731	B2HFU9	>tr|B2HFU9|B2HFU9_MYCMM ATP-dependent DNA helicase HelY OS=Mycobacterium marinum (strain ATCC BAA-535 / M) GN=helY PE=4 SV=1	36	36	39.2	100.6	19.3486	18.6467	17.1351	29.3966	0.963723	1.08822	1.71558
iniC	2701	B2HP36	>tr|B2HP36|B2HP36_MYCMM Isoniazid inductible protein IniC OS=Mycobacterium marinum (strain ATCC BAA-535 / M) GN=iniC PE=4 SV=1	19	19	33.5	52.838	9.44624	6.68143	6.14145	11.8302	0.707311	1.08792	1.92628
MMAR_4209	3431	B2HS39	>tr|B2HS39|B2HS39_MYCMM Transport transmembrane protein OS=Mycobacterium marinum (strain ATCC BAA-535 / M) GN=MMAR_4209 PE=4 SV=1	12	12	34.3	47.605	11.3854	13.527	12.4412	22.1942	1.1881	1.08728	1.78393
rpsR1	1346	B2HIB9	>sp|B2HIB9|RS181_MYCMM 30S ribosomal protein S18 1 OS=Mycobacterium marinum (strain ATCC BAA-535 / M) GN=rpsR1 PE=3 SV=1	10	10	75	9.5421	17.4323	24.5293	22.5675	28.9406	1.40711	1.08693	1.2824
MMAR_4413	3729	B2HT99	>tr|B2HT99|B2HT99_MYCMM Uncharacterized protein OS=Mycobacterium marinum (strain ATCC BAA-535 / M) GN=MMAR_4413 PE=4 SV=1	6	6	14.8	41.31	6.44572	6.72832	6.1942	4.11721	1.04384	1.08623	0.664689
drrC	1432	B2HIM4	>tr|B2HIM4|B2HIM4_MYCMM Daunorubicin-DIM-transport integral membrane protein ABC transporter DrrC OS=Mycobacterium marinum (strain ATCC BAA-535 / M) GN=drrC PE=4 SV=1	3	3	12.8	29.801	11.374	9.82829	9.04811	5.67072	0.864104	1.08623	0.62673
bcpB	2999	B2HQB7	>tr|B2HQB7|B2HQB7_MYCMM Peroxidoxin BcpB OS=Mycobacterium marinum (strain ATCC BAA-535 / M) GN=bcpB PE=4 SV=1	9	9	50	16.515	6.95918	9.82829	9.04811	12.8731	1.41228	1.08623	1.42274
atpB	3057	B2HQK8	>sp|B2HQK8|ATP6_MYCMM ATP synthase subunit a OS=Mycobacterium marinum (strain ATCC BAA-535 / M) GN=atpB PE=3 SV=1	3	3	8.8	27.355	5.46465	6.19994	5.70782	6.18128	1.13455	1.08622	1.08295
oppD	3255	B2HRB4	>tr|B2HRB4|B2HRB4_MYCMM Oligopeptide-transport ATP-binding protein ABC transporter OppD OS=Mycobacterium marinum (strain ATCC BAA-535 / M) GN=oppD PE=3 SV=1	26	26	43.3	65.581	33.1523	35.5441	32.7467	34.0243	1.07215	1.08543	1.03902
MMAR_0495	2459	B2HN20	>tr|B2HN20|B2HN20_MYCMM Conserved hypothetical secreted protein OS=Mycobacterium marinum (strain ATCC BAA-535 / M) GN=MMAR_0495 PE=4 SV=1	4	4	27	20.019	9.42331	10.4036	9.58724	7.23514	1.10403	1.08515	0.754664
MMAR_5012	1260	B2HI16	>tr|B2HI16|B2HI16_MYCMM Conserved hypothetical membrane protein OS=Mycobacterium marinum (strain ATCC BAA-535 / M) GN=MMAR_5012 PE=4 SV=1	11	11	41.7	32.851	44.1275	60.7659	56.0116	58.3917	1.37705	1.08488	1.04249
MMAR_5058	1519	B2HIZ9	>tr|B2HIZ9|B2HIZ9_MYCMM Conserved hypothetical secreted protein OS=Mycobacterium marinum (strain ATCC BAA-535 / M) GN=MMAR_5058 PE=4 SV=1	5	5	10.5	30.196	12.4124	12.9048	11.902	10.3203	1.03967	1.08425	0.867107
infC	3188	B2HR12	>tr|B2HR12|B2HR12_MYCMM Translation initiation factor IF-3 OS=Mycobacterium marinum (strain ATCC BAA-535 / M) GN=infC PE=3 SV=1	9	9	62.3	18.911	19.8277	20.1381	18.5826	20.1083	1.01565	1.08371	1.0821
pepC	1017	B2HH40	>tr|B2HH40|B2HH40_MYCMM Probable M18 family aminopeptidase 2 OS=Mycobacterium marinum (strain ATCC BAA-535 / M) GN=pepC PE=3 SV=1	19	19	47.9	45.628	14.3401	9.27646	8.56174	9.82068	0.64689	1.08348	1.14704
MMAR_5400	2372	B2HMN6	>tr|B2HMN6|B2HMN6_MYCMM Conserved protein OS=Mycobacterium marinum (strain ATCC BAA-535 / M) GN=MMAR_5400 PE=4 SV=1	15	15	56.9	23.754	25.8173	31.575	29.1426	32.9486	1.22302	1.08346	1.1306
udgL	2907	B2HQ15	>tr|B2HQ15|B2HQ15_MYCMM UDP-glucose 6-dehydrogenase, UdgL OS=Mycobacterium marinum (strain ATCC BAA-535 / M) GN=udgL PE=3 SV=1	20	20	39.5	46.201	27.7565	30.401	28.0643	16.5125	1.09528	1.08326	0.588381
MMAR_4039	3011	B2HQF4	>tr|B2HQF4|B2HQF4_MYCMM Conserved hypothetical membrane protein OS=Mycobacterium marinum (strain ATCC BAA-535 / M) GN=MMAR_4039 PE=4 SV=1	3	3	23.3	13.537	8.93278	9.85174	9.10087	9.28829	1.10288	1.08251	1.02059
MMAR_2307	2906	B2HQ13	>tr|B2HQ13|B2HQ13_MYCMM Hypothetical transmembrane protein OS=Mycobacterium marinum (strain ATCC BAA-535 / M) GN=MMAR_2307 PE=4 SV=1	12	12	17.5	68.613	28.2929	33.5244	30.971	26.3114	1.18491	1.08244	0.849549
atpC	3050	B2HQK1	>sp|B2HQK1|ATPE_MYCMM ATP synthase epsilon chain OS=Mycobacterium marinum (strain ATCC BAA-535 / M) GN=atpC PE=3 SV=1	5	5	35.5	12.997	5.95518	7.28015	6.73333	12.9604	1.22249	1.08121	1.92482
rplQ	46	B2HCX5	>sp|B2HCX5|RL17_MYCMM 50S ribosomal protein L17 OS=Mycobacterium marinum (strain ATCC BAA-535 / M) GN=rplQ PE=3 SV=1	5	5	27.5	20.193	17.3521	20.7134	19.1745	23.1498	1.19371	1.08026	1.20732
MMAR_1964	1949	B2HKZ3	>tr|B2HKZ3|B2HKZ3_MYCMM O-methyltransferase OS=Mycobacterium marinum (strain ATCC BAA-535 / M) GN=MMAR_1964 PE=3 SV=1	11	11	37.6	33.198	27.7565	26.8664	24.8823	34.4694	0.967933	1.07974	1.3853
MMAR_2403	2992	B2HQB0	>tr|B2HQB0|B2HQB0_MYCMM Deacylase OS=Mycobacterium marinum (strain ATCC BAA-535 / M) GN=MMAR_2403 PE=3 SV=1	13	13	32.2	38.32	7.47264	3.60491	3.34029	2.56371	0.482414	1.07922	0.767511
MMAR_0804	3130	B2HQU4	>tr|B2HQU4|B2HQU4_MYCMM Conserved membrane protein OS=Mycobacterium marinum (strain ATCC BAA-535 / M) GN=MMAR_0804 PE=4 SV=1	19	19	61.8	36.635	100.725	105.305	97.5953	98.0322	1.04548	1.079	1.00448
modC	92	B2HD41	>tr|B2HD41|B2HD41_MYCMM Molybdenum-transport ATP-binding protein ABC transporter ModC OS=Mycobacterium marinum (strain ATCC BAA-535 / M) GN=modC PE=3 SV=1	10	10	23.5	43.519	11.9104	9.75795	9.04811	9.26646	0.819282	1.07845	1.02413
grpE	2836	B2HPS2	>tr|B2HPS2|B2HPS2_MYCMM Protein GrpE OS=Mycobacterium marinum (strain ATCC BAA-535 / M) GN=grpE PE=3 SV=1	13	13	62.2	22.766	15.3556	16.9912	15.7814	15.4805	1.10652	1.07666	0.98093
ispH	3679	B2HT41	>tr|B2HT41|B2HT41_MYCMM 4-hydroxy-3-methylbut-2-enyl diphosphate reductase OS=Mycobacterium marinum (strain ATCC BAA-535 / M) GN=ispH PE=3 SV=1	5	5	13.9	35.984	5.96665	3.6518	3.39304	2.58554	0.612035	1.07626	0.762012
wbbL2	2944	B2HQ55	>tr|B2HQ55|B2HQ55_MYCMM Rhamnosyl transferase WbbL2 OS=Mycobacterium marinum (strain ATCC BAA-535 / M) GN=wbbL2 PE=4 SV=1	13	13	62.4	28.325	36.7351	30.4244	28.2754	34.4366	0.828211	1.076	1.2179
MMAR_2583	3410	B2HRZ9	>tr|B2HRZ9|B2HRZ9_MYCMM Sodium/hydrogen exchanger (Antiporter) OS=Mycobacterium marinum (strain ATCC BAA-535 / M) GN=MMAR_2583 PE=4 SV=1	5	5	9	52.814	5.47612	7.18637	6.68058	9.78794	1.31231	1.07571	1.46513
MMAR_4192	3294	B2HRG9	>tr|B2HRG9|B2HRG9_MYCMM Drug-transport integral membrane protein OS=Mycobacterium marinum (strain ATCC BAA-535 / M) GN=MMAR_4192 PE=4 SV=1	6	6	15.7	66.232	5.94372	7.76165	7.21971	10.3203	1.30586	1.07506	1.42947
atpG	3052	B2HQK3	>sp|B2HQK3|ATPG_MYCMM ATP synthase gamma chain OS=Mycobacterium marinum (strain ATCC BAA-535 / M) GN=atpG PE=3 SV=1	35	35	65.5	33.704	136.958	181.149	168.574	136.196	1.32266	1.0746	0.807928
MMAR_1965	1950	B2HKZ4	>tr|B2HKZ4|B2HKZ4_MYCMM Short chain dehydrogenase OS=Mycobacterium marinum (strain ATCC BAA-535 / M) GN=MMAR_1965 PE=3 SV=1	8	7	28.2	28.523	5.45319	7.23326	6.73333	7.2024	1.32643	1.07425	1.06966
adh	1104	B2HHG7	>tr|B2HHG7|B2HHG7_MYCMM NADP-dependent alcohol dehydrogenase Adh OS=Mycobacterium marinum (strain ATCC BAA-535 / M) GN=adh PE=3 SV=1	20	20	48.3	37.152	22.3262	13.2925	12.3884	22.1832	0.595377	1.07298	1.79065
MMAR_2167	2533	B2HNB8	>tr|B2HNB8|B2HNB8_MYCMM Conserved alanine, valine and leucine rich protein OS=Mycobacterium marinum (strain ATCC BAA-535 / M) GN=MMAR_2167 PE=4 SV=1	11	11	34.1	47.516	6.94771	4.15674	3.87942	6.18128	0.598289	1.07149	1.59335
oppA	3256	B2HRB5	>tr|B2HRB5|B2HRB5_MYCMM Periplasmic oligopeptide-binding lipoprotein OppA OS=Mycobacterium marinum (strain ATCC BAA-535 / M) GN=oppA PE=4 SV=1	17	17	40	62.424	15.9149	20.643	19.28	20.6407	1.29709	1.0707	1.07057
MMAR_0014	1297	B2HI59	>tr|B2HI59|B2HI59_MYCMM Conserved hypothetical membrane protein OS=Mycobacterium marinum (strain ATCC BAA-535 / M) GN=MMAR_0014 PE=4 SV=1	12	12	42.1	26.756	12.4124	17.0616	15.9397	17.5227	1.37456	1.07038	1.09931
prrA	591	B2HF74	>tr|B2HF74|B2HF74_MYCMM Two-component response transcriptional regulatory protein PrrA OS=Mycobacterium marinum (strain ATCC BAA-535 / M) GN=prrA PE=4 SV=1	6	6	30.9	25.283	6.95918	6.72832	6.29971	8.25626	0.966827	1.06804	1.31058
MMAR_5379	2355	B2HML4	>tr|B2HML4|B2HML4_MYCMM Acyltransferase OS=Mycobacterium marinum (strain ATCC BAA-535 / M) GN=MMAR_5379 PE=4 SV=1	16	16	50.2	28.498	53.6196	46.981	44.004	38.1852	0.876192	1.06765	0.867766
gabD2	3401	B2HRY7	>tr|B2HRY7|B2HRY7_MYCMM Succinate-semialdehyde dehydrogenase [NADP+] dependent (SsdH) GabD2 OS=Mycobacterium marinum (strain ATCC BAA-535 / M) GN=gabD2 PE=3 SV=1	39	39	62	55.186	96.9036	81.7858	76.6452	76.4359	0.843991	1.06707	0.99727
rpoC	3541	B2HSJ4	>sp|B2HSJ4|RPOC_MYCMM DNA-directed RNA polymerase subunit beta OS=Mycobacterium marinum (strain ATCC BAA-535 / M) GN=rpoC PE=3 SV=1	101	101	55.5	146.76	248.884	205.996	193.098	222.854	0.827676	1.06679	1.15409
MMAR_4096	3060	B2HQL1	>tr|B2HQL1|B2HQL1_MYCMM Uncharacterized protein OS=Mycobacterium marinum (strain ATCC BAA-535 / M) GN=MMAR_4096 PE=4 SV=1	6	6	33.3	22.217	5.95518	7.23326	6.78608	8.77774	1.21462	1.0659	1.29349
MMAR_1135	73	B2HD20	>tr|B2HD20|B2HD20_MYCMM Uncharacterized protein OS=Mycobacterium marinum (strain ATCC BAA-535 / M) GN=MMAR_1135 PE=4 SV=1	4	4	13.7	31.956	5.96665	6.65798	6.24695	6.71367	1.11587	1.0658	1.07471
MMAR_1351	508	B2HEV3	>tr|B2HEV3|B2HEV3_MYCMM Uncharacterized protein OS=Mycobacterium marinum (strain ATCC BAA-535 / M) GN=MMAR_1351 PE=4 SV=1	17	17	53.7	37.554	28.7605	33.0898	31.0765	27.3543	1.15053	1.06478	0.880225
MMAR_4342	3674	B2HT28	>tr|B2HT28|B2HT28_MYCMM Uncharacterized protein OS=Mycobacterium marinum (strain ATCC BAA-535 / M) GN=MMAR_4342 PE=4 SV=1	10	10	39.1	26.757	10.4273	10.2629	9.64	8.24535	0.984232	1.06462	0.855327
lppS	2618	B2HNN0	>tr|B2HNN0|B2HNN0_MYCMM Conserved lipoprotein LppS OS=Mycobacterium marinum (strain ATCC BAA-535 / M) GN=lppS PE=4 SV=1	13	13	32.8	42.44	26.741	28.8862	27.1971	19.5759	1.08022	1.0621	0.719778
MMAR_0764	3096	B2HQQ4	>tr|B2HQQ4|B2HQQ4_MYCMM Conserved secreted protein OS=Mycobacterium marinum (strain ATCC BAA-535 / M) GN=MMAR_0764 PE=4 SV=1	6	6	27.3	29.699	9.42331	11.3197	10.6655	9.28829	1.20124	1.06133	0.870873
accD4_1	2341	B2HMJ8	>tr|B2HMJ8|B2HMJ8_MYCMM Propionyl-CoA carboxylase beta chain 4 AccD4_1 OS=Mycobacterium marinum (strain ATCC BAA-535 / M) GN=accD4_1 PE=4 SV=1	21	21	44.9	56.913	39.1534	28.9096	27.2498	26.3223	0.738368	1.06091	0.965961
fbpA	2346	B2HMK3;B2HED7	>tr|B2HMK3|B2HMK3_MYCMM Secreted antigen 85-A FbpA OS=Mycobacterium marinum (strain ATCC BAA-535 / M) GN=fbpA PE=4 SV=1	10	8	29.4	35.643	28.8178	35.344	33.3385	31.8839	1.22647	1.06015	0.956366
MMAR_4210	3432	B2HS40	>tr|B2HS40|B2HS40_MYCMM Conserved hypothetical membrane protein OS=Mycobacterium marinum (strain ATCC BAA-535 / M) GN=MMAR_4210 PE=4 SV=1	15	15	41.5	20.053	19.8391	14.4431	13.6249	13.3837	0.728009	1.06005	0.982294
MMAR_4540	383	B2HEC1	>tr|B2HEC1|B2HEC1_MYCMM Uncharacterized protein OS=Mycobacterium marinum (strain ATCC BAA-535 / M) GN=MMAR_4540 PE=4 SV=1	14	14	22.3	73.67	15.8805	14.4431	13.6249	8.25626	0.909486	1.06005	0.605968
MMAR_2098	2481	B2HN50	>sp|B2HN50|Y2098_MYCMM Probable transcriptional regulatory protein MMAR_2098 OS=Mycobacterium marinum (strain ATCC BAA-535 / M) GN=MMAR_2098 PE=3 SV=1	8	8	25.5	26.814	10.8949	7.18637	6.78608	10.2985	0.659608	1.05899	1.51759
pntAa	2152	B2HLU5	>tr|B2HLU5|B2HLU5_MYCMM NAD(P) transhydrogenase (Subunit alpha) PntAa OS=Mycobacterium marinum (strain ATCC BAA-535 / M) GN=pntAa PE=4 SV=1	20	20	64.6	37.27	65.0509	69.3264	65.4933	94.8706	1.06573	1.05853	1.44855
MMAR_4037	3009	B2HQF2	>tr|B2HQF2|B2HQF2_MYCMM Transmembrane ATP-binding protein ABC transporter OS=Mycobacterium marinum (strain ATCC BAA-535 / M) GN=MMAR_4037 PE=3 SV=1	34	34	42.1	94.45	45.6564	52.2414	49.3953	66.5061	1.14423	1.05762	1.3464
eno	177	B2HDI5	>sp|B2HDI5|ENO_MYCMM Enolase OS=Mycobacterium marinum (strain ATCC BAA-535 / M) GN=eno PE=3 SV=1	18	18	43	44.75	38.6514	35.0861	33.1803	40.2493	0.907758	1.05744	1.21305
phoS2	413	B2HEG0	>tr|B2HEG0|B2HEG0_MYCMM Periplasmic phosphate-binding lipoprotein PhoS2 OS=Mycobacterium marinum (strain ATCC BAA-535 / M) GN=phoS2 PE=4 SV=1	16	16	51.1	37.58	60.5558	100.865	95.4272	71.1884	1.66566	1.05699	0.745997
qcrB	958	B2HGW4	>tr|B2HGW4|B2HGW4_MYCMM Ubiquinol-cytochrome C reductase QcrB OS=Mycobacterium marinum (strain ATCC BAA-535 / M) GN=qcrB PE=4 SV=1	29	29	35.8	62.187	137.345	148.364	140.427	127.983	1.08023	1.05652	0.911383
MMAR_2155	2522	B2HNA6	>tr|B2HNA6|B2HNA6_MYCMM Conserved membrane glycine rich protein OS=Mycobacterium marinum (strain ATCC BAA-535 / M) GN=MMAR_2155 PE=4 SV=1	5	5	29.6	31.066	5.44172	7.7382	7.32521	10.8418	1.42201	1.05638	1.48007
MMAR_2229	2732	B2HP74	>tr|B2HP74|B2HP74_MYCMM Conserved membrane protein OS=Mycobacterium marinum (strain ATCC BAA-535 / M) GN=MMAR_2229 PE=4 SV=1	9	9	35.5	37.627	6.42279	3.58146	3.39304	4.62777	0.557618	1.05553	1.3639
rplE	6	B2HCT3	>tr|B2HCT3|B2HCT3_MYCMM 50S ribosomal protein L5 OS=Mycobacterium marinum (strain ATCC BAA-535 / M) GN=rplE PE=3 SV=1	21	21	77.9	21.304	121.625	114.816	108.905	117.065	0.944016	1.05427	1.07492
pyrC	2557	B2HNE7	>tr|B2HNE7|B2HNE7_MYCMM Dihydroorotase OS=Mycobacterium marinum (strain ATCC BAA-535 / M) GN=pyrC PE=3 SV=1	12	12	31.9	45.426	6.43425	8.29003	7.86434	8.76682	1.28842	1.05413	1.11476
MMAR_0955	3505	B2HSF4	>sp|B2HSF4|Y955_MYCMM Putative S-adenosyl-L-methionine-dependent methyltransferase MMAR_0955 OS=Mycobacterium marinum (strain ATCC BAA-535 / M) GN=MMAR_0955 PE=3 SV=1	9	9	24.6	34.681	7.94025	4.0864	3.87942	7.22423	0.514644	1.05335	1.86219
pnp	1926	B2HKV3	>sp|B2HKV3|PNP_MYCMM Polyribonucleotide nucleotidyltransferase OS=Mycobacterium marinum (strain ATCC BAA-535 / M) GN=pnp PE=3 SV=1	41	41	38.5	80.632	66.4193	59.6748	56.9959	78.4345	0.898456	1.047	1.37614
rplN	4	B2HCT1	>sp|B2HCT1|RL14_MYCMM 50S ribosomal protein L14 OS=Mycobacterium marinum (strain ATCC BAA-535 / M) GN=rplN PE=3 SV=1	11	11	67.2	13.442	17.3521	21.817	20.8446	21.173	1.25731	1.04665	1.01576
groS	66	B2HD09	>sp|B2HD09|CH10_MYCMM 10 kDa chaperonin OS=Mycobacterium marinum (strain ATCC BAA-535 / M) GN=groS PE=3 SV=1	10	10	99	10.747	11.876	16.0517	15.3478	21.6945	1.35161	1.04586	1.41352
MMAR_3446	1492	B2HIW4	>tr|B2HIW4|B2HIW4_MYCMM Conserved protein OS=Mycobacterium marinum (strain ATCC BAA-535 / M) GN=MMAR_3446 PE=4 SV=1	11	11	53.8	22.244	8.40785	7.76165	7.43072	4.60594	0.923143	1.04453	0.619851
deaD	3292	B2HRG6	>tr|B2HRG6|B2HRG6_MYCMM Cold-shock DEAD-Box protein, DeaD OS=Mycobacterium marinum (strain ATCC BAA-535 / M) GN=deaD PE=3 SV=1	27	27	46.2	62.581	48.5881	45.9477	44.004	44.3774	0.945657	1.04417	1.00848
mtrB	476	B2HEQ1	>tr|B2HEQ1|B2HEQ1_MYCMM Two-component sensory transduction histidine kinase MtrB OS=Mycobacterium marinum (strain ATCC BAA-535 / M) GN=mtrB PE=4 SV=1	34	34	59.7	60.673	48.1893	54.0971	51.8156	52.6446	1.12259	1.04403	1.016
MMAR_0300	1898	B2HKR2	>tr|B2HKR2|B2HKR2_MYCMM Rhomboid family serine protease OS=Mycobacterium marinum (strain ATCC BAA-535 / M) GN=MMAR_0300 PE=4 SV=1	5	5	15.9	31.097	9.43477	11.848	11.3629	14.9699	1.25578	1.0427	1.31744
MMAR_1415	693	B2HFN0	>tr|B2HFN0|B2HFN0_MYCMM Uncharacterized protein OS=Mycobacterium marinum (strain ATCC BAA-535 / M) GN=MMAR_1415 PE=4 SV=1	9	9	41.6	21.719	19.8506	21.148	20.3055	20.6188	1.06536	1.04149	1.01543
MMAR_0797	3123	B2HQT7	>tr|B2HQT7|B2HQT7_MYCMM Transcriptional regulatory protein (Possibly TetR-family) OS=Mycobacterium marinum (strain ATCC BAA-535 / M) GN=MMAR_0797 PE=4 SV=1	9	9	35	26.271	6.44572	4.59134	4.41855	6.18128	0.712308	1.03911	1.39894
pknG	2891	B2HPZ5	>tr|B2HPZ5|B2HPZ5_MYCMM Serine/threonine-protein kinase PknG OS=Mycobacterium marinum (strain ATCC BAA-535 / M) GN=pknG PE=4 SV=1	39	39	46.3	83.29	55.0797	71.7573	69.0678	69.6786	1.30279	1.03894	1.00884
MMAR_1360	656	B2HFH4	>tr|B2HFH4|B2HFH4_MYCMM Transmembrane cation transporter OS=Mycobacterium marinum (strain ATCC BAA-535 / M) GN=MMAR_1360 PE=4 SV=1	15	15	46.6	37.986	52.0907	55.7291	53.644	65.9737	1.06985	1.03887	1.22984
MMAR_2612	3425	B2HS28	>tr|B2HS28|B2HS28_MYCMM Conserved transmembrane ATP-binding protein ABC transporter OS=Mycobacterium marinum (strain ATCC BAA-535 / M) GN=MMAR_2612 PE=4 SV=1	36	36	47.2	93.298	142.936	147.002	141.652	154.283	1.02845	1.03777	1.08917
sucC	391	B2HED1	>sp|B2HED1|SUCC_MYCMM Succinyl-CoA ligase [ADP-forming] subunit beta OS=Mycobacterium marinum (strain ATCC BAA-535 / M) GN=sucC PE=3 SV=1	21	21	47	40.82	21.8357	13.4098	12.9275	21.1512	0.614121	1.0373	1.63614
ggtB	2273	B2HMA9	>tr|B2HMA9|B2HMA9_MYCMM Gamma-glutamyltranspeptidase GgtB OS=Mycobacterium marinum (strain ATCC BAA-535 / M) GN=ggtB PE=4 SV=1	22	22	37.2	66.49	50.0712	46.4058	44.7542	45.4422	0.926795	1.0369	1.01537
MMAR_0721	2898	B2HQ03	>tr|B2HQ03|B2HQ03_MYCMM Conserved hypothetical hydrolase OS=Mycobacterium marinum (strain ATCC BAA-535 / M) GN=MMAR_0721 PE=4 SV=1	6	6	32.2	28.242	8.92131	9.32335	8.99536	10.3203	1.04507	1.03646	1.14729
narL	800	B2HG74	>tr|B2HG74|B2HG74_MYCMM Nitrate/nitrite response regulator protein NarL OS=Mycobacterium marinum (strain ATCC BAA-535 / M) GN=narL PE=4 SV=1	9	9	47.7	22.974	7.44971	8.31348	8.02261	10.3312	1.11595	1.03626	1.28777
pfkA	1372	B2HIF8	>tr|B2HIF8|B2HIF8_MYCMM 6-phosphofructokinase OS=Mycobacterium marinum (strain ATCC BAA-535 / M) GN=pfkA PE=3 SV=1	12	12	43.4	37.243	7.44971	7.64441	7.37797	8.25626	1.02614	1.03611	1.11904
MMAR_1747	1411	B2HIK2	>tr|B2HIK2|B2HIK2_MYCMM Conserved membrane protein OS=Mycobacterium marinum (strain ATCC BAA-535 / M) GN=MMAR_1747 PE=4 SV=1	27	27	68.6	27.107	86.2241	95.0188	91.7177	93.8822	1.102	1.03599	1.0236
mmpL11	2427	B2HMX0	>tr|B2HMX0|B2HMX0_MYCMM Conserved transmembrane transport protein MmpL11 OS=Mycobacterium marinum (strain ATCC BAA-535 / M) GN=mmpL11 PE=4 SV=1	28	28	28.4	107.61	26.741	31.0466	29.9983	29.3966	1.16101	1.03495	0.979942
zwf2	2751	B2HP97	>tr|B2HP97|B2HP97_MYCMM Glucose-6-phosphate 1-dehydrogenase OS=Mycobacterium marinum (strain ATCC BAA-535 / M) GN=zwf2 PE=3 SV=1	18	18	35	57.635	8.92131	8.24314	7.96985	9.78794	0.923983	1.03429	1.22812
ppm1B	568	B2HF47	>tr|B2HF47|B2HF47_MYCMM Polyprenol-monophosphomannose synthase, Ppm1B OS=Mycobacterium marinum (strain ATCC BAA-535 / M) GN=ppm1B PE=4 SV=1	22	20	68.3	29.387	101.671	89.7115	86.7716	91.8072	0.882368	1.03388	1.05803
proX	2067	B2HLH4	>tr|B2HLH4|B2HLH4_MYCMM Osmoprotectant (Glycine betaine/carnitine/choline/L-proline) binding lipoprotein ProX OS=Mycobacterium marinum (strain ATCC BAA-535 / M) GN=proX PE=4 SV=1	9	9	41.6	33.418	14.4089	12.8579	12.4412	11.2978	0.89236	1.0335	0.908097
fbpC	2112	B2HLP6	>tr|B2HLP6|B2HLP6_MYCMM Secreted antigen 85-C FbpC OS=Mycobacterium marinum (strain ATCC BAA-535 / M) GN=fbpC PE=4 SV=1	12	11	35.8	36.668	58.5937	68.9622	66.7298	40.1838	1.17696	1.03345	0.602186
ftsX	881	B2HGJ6	>tr|B2HGJ6|B2HGJ6_MYCMM Cell division protein FtsX OS=Mycobacterium marinum (strain ATCC BAA-535 / M) GN=ftsX PE=4 SV=1	11	11	30	32.765	25.3153	27.9701	27.0916	33.4483	1.10487	1.03243	1.23464
rpsG	3557	B2HSL1	>sp|B2HSL1|RS7_MYCMM 30S ribosomal protein S7 OS=Mycobacterium marinum (strain ATCC BAA-535 / M) GN=rpsG PE=3 SV=1	20	20	71.2	17.6	44.618	52.429	50.7901	69.4737	1.17506	1.03227	1.36786
MMAR_0360	2139	B2HLS8	>tr|B2HLS8|B2HLS8_MYCMM Short-chain type dehydrogenase/reductase OS=Mycobacterium marinum (strain ATCC BAA-535 / M) GN=MMAR_0360 PE=4 SV=1	13	13	53.1	29.785	24.3227	26.2911	25.4742	33.5138	1.08093	1.03207	1.3156
ceoB	2194	B2HM09	>tr|B2HM09|B2HM09_MYCMM TRK system potassium uptake protein CeoB OS=Mycobacterium marinum (strain ATCC BAA-535 / M) GN=ceoB PE=4 SV=1	12	12	56.4	24.117	27.8138	27.8997	27.0388	29.9399	1.00309	1.03184	1.10729
MMAR_1667	1117	B2HHI5	>tr|B2HHI5|B2HHI5_MYCMM Conserved membrane protein OS=Mycobacterium marinum (strain ATCC BAA-535 / M) GN=MMAR_1667 PE=4 SV=1	15	15	34.9	45.496	16.3825	16.3925	15.887	17.0231	1.00061	1.03182	1.07151
rpsS	3574	B2HSN5	>sp|B2HSN5|RS19_MYCMM 30S ribosomal protein S19 OS=Mycobacterium marinum (strain ATCC BAA-535 / M) GN=rpsS PE=3 SV=1	16	16	82.8	10.789	38.6743	58.9103	57.1953	31.8074	1.52324	1.02998	0.556119
MMAR_5377	2353	B2HML2	>tr|B2HML2|B2HML2_MYCMM Acyltransferase OS=Mycobacterium marinum (strain ATCC BAA-535 / M) GN=MMAR_5377 PE=4 SV=1	11	11	44.1	28.947	15.8805	14.5134	14.1113	12.884	0.913915	1.0285	0.91303
fadD15_1	2050	B2HLE7	>tr|B2HLE7|B2HLE7_MYCMM Long-chain-fatty-acid-CoA ligase FadD15_1 OS=Mycobacterium marinum (strain ATCC BAA-535 / M) GN=fadD15_1 PE=4 SV=1	35	32	45.7	64.336	75.3177	70.8178	68.9507	75.3275	0.940255	1.02708	1.09248
fas	2816	B2HPL8	>tr|B2HPL8|B2HPL8_MYCMM Fatty acid synthase Fas OS=Mycobacterium marinum (strain ATCC BAA-535 / M) GN=fas PE=4 SV=1	146	146	45.9	325.94	472.669	336.746	327.93	244.635	0.712435	1.02688	0.745999
plsB	2592	B2HNJ0	>sp|B2HNJ0|PLSB_MYCMM Glycerol-3-phosphate acyltransferase OS=Mycobacterium marinum (strain ATCC BAA-535 / M) GN=plsB PE=3 SV=1	47	47	44.2	88.235	84.8212	77.4523	75.4846	92.3505	0.913124	1.02607	1.22344
MMAR_4770	797	B2HG62	>tr|B2HG62|B2HG62_MYCMM Oxidase OS=Mycobacterium marinum (strain ATCC BAA-535 / M) GN=MMAR_4770 PE=4 SV=1	17	16	36.4	58.683	35.7082	32.4911	31.6684	26.8547	0.909905	1.02598	0.847996
amiA2	2027	B2HLB3	>tr|B2HLB3|B2HLB3_MYCMM Amidase AmiA2 OS=Mycobacterium marinum (strain ATCC BAA-535 / M) GN=amiA2 PE=4 SV=1	23	22	38.1	52.257	32.263	39.2194	38.2962	36.6099	1.21562	1.02411	0.955966
sugC	3305	B2HRI0	>tr|B2HRI0|B2HRI0_MYCMM Sugar-transport ATP-binding protein ABC transporter SugC OS=Mycobacterium marinum (strain ATCC BAA-535 / M) GN=sugC PE=3 SV=1	8	8	23.8	43.137	10.4273	9.80485	9.58724	10.3203	0.940305	1.0227	1.07646
MMAR_2342	2938	B2HQ48	>tr|B2HQ48|B2HQ48_MYCMM Conserved transmembrane transport protein, MmpL family OS=Mycobacterium marinum (strain ATCC BAA-535 / M) GN=MMAR_2342 PE=4 SV=1	19	19	15.9	151.51	29.2969	30.9528	30.2736	14.4594	1.05652	1.02244	0.477623
glyS	2021	B2HLA7	>tr|B2HLA7|B2HLA7_MYCMM Glycine--tRNA ligase OS=Mycobacterium marinum (strain ATCC BAA-535 / M) GN=glyS PE=3 SV=1	21	21	46	52.689	20.7744	22.2985	21.8174	25.2793	1.07337	1.02205	1.15868
mqo	1686	B2HJU4	>sp|B2HJU4|MQO_MYCMM Probable malate:quinone oxidoreductase OS=Mycobacterium marinum (strain ATCC BAA-535 / M) GN=mqo PE=3 SV=1	12	12	30.2	53.717	7.42678	8.74808	8.56174	11.852	1.17791	1.02176	1.3843
MMAR_2613	3426	B2HS29	>tr|B2HS29|B2HS29_MYCMM Conserved membrane protein OS=Mycobacterium marinum (strain ATCC BAA-535 / M) GN=MMAR_2613 PE=4 SV=1	2	2	18.1	17.504	3.98159	6.27028	6.14145	10.2439	1.57482	1.02098	1.668
pepD	372	B2HEA8	>tr|B2HEA8|B2HEA8_MYCMM Serine protease PepD OS=Mycobacterium marinum (strain ATCC BAA-535 / M) GN=pepD PE=4 SV=1	21	21	49.5	47.811	72.8192	83.1942	81.4858	85.1154	1.14248	1.02097	1.04454
MMAR_2388	2977	B2HQ95	>tr|B2HQ95|B2HQ95_MYCMM Conserved hypothetical transmembrane protein OS=Mycobacterium marinum (strain ATCC BAA-535 / M) GN=MMAR_2388 PE=4 SV=1	3	3	13.2	19.603	5.46465	5.16662	5.06319	5.67072	0.945461	1.02043	1.11999
MMAR_4301	3485	B2HSC9	>tr|B2HSC9|B2HSC9_MYCMM Transcriptional regulatory protein OS=Mycobacterium marinum (strain ATCC BAA-535 / M) GN=MMAR_4301 PE=4 SV=1	11	11	88.4	13.102	5.97811	4.61478	4.52406	5.65981	0.771946	1.02005	1.25105
cbhK	963	B2HGX0	>tr|B2HGX0|B2HGX0_MYCMM Carbohydrate kinase CbhK OS=Mycobacterium marinum (strain ATCC BAA-535 / M) GN=cbhK PE=4 SV=1	8	8	41.7	34.417	5.94372	4.06295	3.98493	4.62777	0.683571	1.01958	1.16132
MMAR_2730	86	B2HD35	>tr|B2HD35|B2HD35_MYCMM Oxidoreductase OS=Mycobacterium marinum (strain ATCC BAA-535 / M) GN=MMAR_2730 PE=4 SV=1	8	8	45.3	23.29	12.4353	9.82829	9.64	8.23443	0.790355	1.01953	0.854194
clpP1	2573	B2HNG5	>tr|B2HNG5|B2HNG5_MYCMM ATP-dependent Clp protease proteolytic subunit OS=Mycobacterium marinum (strain ATCC BAA-535 / M) GN=clpP1 PE=3 SV=1	4	4	24.7	21.52	8.41931	9.82829	9.64	16.4798	1.16735	1.01953	1.70952
coaX	1556	B2HJ44	>sp|B2HJ44|COAX_MYCMM Type III pantothenate kinase OS=Mycobacterium marinum (strain ATCC BAA-535 / M) GN=coaX PE=3 SV=1	10	10	37.9	29.139	10.9522	10.8616	10.6655	11.8411	0.991726	1.01839	1.11022
MMAR_1606	1074	B2HHC5	>tr|B2HHC5|B2HHC5_MYCMM Fatty-acid-CoA ligase OS=Mycobacterium marinum (strain ATCC BAA-535 / M) GN=MMAR_1606 PE=4 SV=1	16	16	33.3	53.472	13.884	10.2863	10.1264	13.4055	0.740879	1.0158	1.32382
MMAR_5234	1837	B2HKE2	>tr|B2HKE2|B2HKE2_MYCMM Conserved protein OS=Mycobacterium marinum (strain ATCC BAA-535 / M) GN=MMAR_5234 PE=4 SV=1	14	14	73.1	15.242	30.2779	34.1934	33.6667	56.9146	1.12932	1.01565	1.69053
MMAR_2044	2213	B2HM29	>tr|B2HM29|B2HM29_MYCMM Conserved hypothetical membrane protein OS=Mycobacterium marinum (strain ATCC BAA-535 / M) GN=MMAR_2044 PE=4 SV=1	18	18	46.8	53.912	41.1843	43.8576	43.2011	43.8778	1.06491	1.0152	1.01566
rpsE	11	B2HCT8	>sp|B2HCT8|RS5_MYCMM 30S ribosomal protein S5 OS=Mycobacterium marinum (strain ATCC BAA-535 / M) GN=rpsE PE=3 SV=1	18	18	75	22.935	58.5134	59.4981	58.6545	77.3806	1.01683	1.01438	1.31926
MMAR_1757	1420	B2HIL2	>tr|B2HIL2|B2HIL2_MYCMM Conserved hypothetical membrane protein OS=Mycobacterium marinum (strain ATCC BAA-535 / M) GN=MMAR_1757 PE=4 SV=1	25	25	53.3	45.075	49.1131	47.9675	47.2916	35.0673	0.976674	1.01429	0.741512
MMAR_2646	3601	B2HSR8	>tr|B2HSR8|B2HSR8_MYCMM Conserved protein OS=Mycobacterium marinum (strain ATCC BAA-535 / M) GN=MMAR_2646 PE=4 SV=1	25	25	50.4	45.681	44.139	47.9909	47.3443	37.175	1.08727	1.01366	0.785205
MMAR_5444	2393	B2HMT2	>tr|B2HMT2|B2HMT2_MYCMM Conserved membrane protein OS=Mycobacterium marinum (strain ATCC BAA-535 / M) GN=MMAR_5444 PE=4 SV=1	18	17	38.3	51.288	29.7874	26.9133	26.5525	18.0551	0.903513	1.01359	0.679979
MMAR_3036	576	B2HF55	>tr|B2HF55|B2HF55_MYCMM Uncharacterized protein OS=Mycobacterium marinum (strain ATCC BAA-535 / M) GN=MMAR_3036 PE=4 SV=1	14	14	81.4	14.156	21.3451	22.8738	22.5675	32.5582	1.07162	1.01357	1.4427
plsB1	2962	B2HQ77	>tr|B2HQ77|B2HQ77_MYCMM Acyltransferase, PlsB1 OS=Mycobacterium marinum (strain ATCC BAA-535 / M) GN=plsB1 PE=4 SV=1	39	39	38.3	69.704	69.5115	75.4326	74.4359	65.0181	1.08518	1.01339	0.873477
lipN	1410	B2HIK1	>tr|B2HIK1|B2HIK1_MYCMM Lipase/esterase LipN OS=Mycobacterium marinum (strain ATCC BAA-535 / M) GN=lipN PE=4 SV=1	11	11	28.5	39.369	17.8656	16.0282	15.8342	22.1832	0.897158	1.01225	1.40097
plcB_1	2585	B2HNI0	>tr|B2HNI0|B2HNI0_MYCMM Membrane-associated phospholipase C 2 PlcB_1 OS=Mycobacterium marinum (strain ATCC BAA-535 / M) GN=plcB_1 PE=4 SV=1	15	11	32.6	56.12	7.44971	9.80485	9.69275	6.20311	1.31614	1.01156	0.639974
MMAR_5349	2329	B2HMI4	>tr|B2HMI4|B2HMI4_MYCMM Uncharacterized protein OS=Mycobacterium marinum (strain ATCC BAA-535 / M) GN=MMAR_5349 PE=4 SV=1	29	29	67.6	40.429	105.722	83.8993	82.9449	87.7337	0.793586	1.01151	1.05773
rmlC	36	B2HCW5	>tr|B2HCW5|B2HCW5_MYCMM dTDP-4-dehydrorhamnose 3,5-epimerase, RmlC OS=Mycobacterium marinum (strain ATCC BAA-535 / M) GN=rmlC PE=4 SV=1	6	6	38.3	22.08	5.95518	5.71845	5.65507	6.70275	0.960247	1.01121	1.18526
MMAR_2228	2731	B2HP73	>sp|B2HP73|Y2228_MYCMM UPF0042 nucleotide-binding protein MMAR_2228 OS=Mycobacterium marinum (strain ATCC BAA-535 / M) GN=MMAR_2228 PE=3 SV=1	11	11	32	33.203	5.90932	3.53457	3.49855	3.62849	0.598134	1.0103	1.03714
MMAR_3773	2322	B2HMG9	>tr|B2HMG9|B2HMG9_MYCMM Conserved protein OS=Mycobacterium marinum (strain ATCC BAA-535 / M) GN=MMAR_3773 PE=4 SV=1	8	8	63.6	22.125	10.4273	11.3197	11.2046	11.3305	1.08558	1.01027	1.01124
moxR1	2782	B2HPD1	>tr|B2HPD1|B2HPD1_MYCMM Transcriptional regulatory protein, MoxR1 OS=Mycobacterium marinum (strain ATCC BAA-535 / M) GN=moxR1 PE=4 SV=1	22	21	73	40.012	134.06	122.273	121.347	150.177	0.912073	1.00763	1.23759
oppB	3253	B2HRB2	>tr|B2HRB2|B2HRB2_MYCMM Oligopeptide-transport integral membrane protein ABC transporter OppB OS=Mycobacterium marinum (strain ATCC BAA-535 / M) GN=oppB PE=3 SV=1	4	4	23.7	34.978	7.43825	6.72832	6.68058	7.7457	0.904558	1.00715	1.15944
MMAR_3279	1135	B2HHK7	>tr|B2HHK7|B2HHK7_MYCMM Uncharacterized protein OS=Mycobacterium marinum (strain ATCC BAA-535 / M) GN=MMAR_3279 PE=4 SV=1	10	10	33.3	29.8	7.96318	5.695	5.65507	5.64889	0.715167	1.00706	0.998907
MMAR_1294	471	B2HEP5	>tr|B2HEP5|B2HEP5_MYCMM Transcriptional regulatory protein (Probably TetR-family) OS=Mycobacterium marinum (strain ATCC BAA-535 / M) GN=MMAR_1294 PE=4 SV=1	7	7	35.6	23.471	7.92878	5.695	5.65507	6.70275	0.718269	1.00706	1.18526
lpqW	3478	B2HSB6	>tr|B2HSB6|B2HSB6_MYCMM Conserved lipoprotein LpqW OS=Mycobacterium marinum (strain ATCC BAA-535 / M) GN=lpqW PE=4 SV=1	14	14	25.8	65.912	19.8277	21.7232	21.6064	14.4485	1.0956	1.00541	0.668713
hspR	2838	B2HPS4	>tr|B2HPS4|B2HPS4_MYCMM Heat shock protein transcriptional repressor HspR (MerR family) OS=Mycobacterium marinum (strain ATCC BAA-535 / M) GN=hspR PE=4 SV=1	9	9	64.8	14.52	9.94824	11.3666	11.3101	11.3414	1.14257	1.00499	1.00277
qcrC	956	B2HGW2	>tr|B2HGW2|B2HGW2_MYCMM Ubiquinol-cytochrome C reductase QcrC OS=Mycobacterium marinum (strain ATCC BAA-535 / M) GN=qcrC PE=4 SV=1	16	16	56.1	31.528	56.0723	56.8328	56.6035	45.3876	1.01356	1.00405	0.801852
MMAR_0349	2129	B2HLR7	>tr|B2HLR7|B2HLR7_MYCMM Oxidoreductase OS=Mycobacterium marinum (strain ATCC BAA-535 / M) GN=MMAR_0349 PE=4 SV=1	23	23	64.1	37.236	36.6778	28.8627	28.7617	30.4286	0.786926	1.00351	1.05795
cbs	3708	B2HT76	>tr|B2HT76|B2HT76_MYCMM Cystathionine beta-synthase Cbs OS=Mycobacterium marinum (strain ATCC BAA-535 / M) GN=cbs PE=4 SV=1	20	20	52.2	48.612	10.4158	10.8616	10.8238	12.3953	1.0428	1.0035	1.14519
MMAR_5371	2349	B2HMK6	>tr|B2HMK6|B2HMK6_MYCMM Conserved transmembrane protein OS=Mycobacterium marinum (strain ATCC BAA-535 / M) GN=MMAR_5371 PE=4 SV=1	5	5	32	18.248	6.95918	11.9418	11.902	3.57391	1.71598	1.00334	0.300277
MMAR_3209	938	B2HGT2	>tr|B2HGT2|B2HGT2_MYCMM Conserved hypothetical membrane protein OS=Mycobacterium marinum (strain ATCC BAA-535 / M) GN=MMAR_3209 PE=4 SV=1	7	7	14.6	56.924	13.4164	16.4394	16.4261	21.1075	1.22532	1.00081	1.285
hycE	1110	B2HHH7	>tr|B2HHH7|B2HHH7_MYCMM Formate hydrogenase HycE OS=Mycobacterium marinum (strain ATCC BAA-535 / M) GN=hycE PE=4 SV=1	15	15	40.6	53.738	8.40785	6.24683	6.24695	4.6496	0.742976	0.99998	0.744299
atsA	3580	B2HSP1	>tr|B2HSP1|B2HSP1_MYCMM Arylsulfatase AtsA OS=Mycobacterium marinum (strain ATCC BAA-535 / M) GN=atsA PE=4 SV=1	17	17	20.9	86.706	7.44971	8.29003	8.29797	14.4375	1.1128	0.999044	1.73989
MMAR_1143	80	B2HD28	>tr|B2HD28|B2HD28_MYCMM Glycosyl hydrolase OS=Mycobacterium marinum (strain ATCC BAA-535 / M) GN=MMAR_1143 PE=4 SV=1	25	25	40.8	88.339	14.4089	15.4998	15.5177	17.034	1.07571	0.998851	1.09772
MMAR_3248	965	B2HGX2	>tr|B2HGX2|B2HGX2_MYCMM Conserved protein OS=Mycobacterium marinum (strain ATCC BAA-535 / M) GN=MMAR_3248 PE=4 SV=1	8	8	66.9	12.466	11.4084	12.4233	12.4412	9.82068	1.08897	0.998567	0.789371
nusA	1905	B2HKS0	>tr|B2HKS0|B2HKS0_MYCMM N utilization substance protein a NusA OS=Mycobacterium marinum (strain ATCC BAA-535 / M) GN=nusA PE=4 SV=1	16	16	45.5	37.855	15.869	12.353	12.3884	13.4164	0.778434	0.997141	1.08298
ctpC	451	B2HEM2	>tr|B2HEM2|B2HEM2_MYCMM Metal cation-transporting p-type ATPase C CtpC OS=Mycobacterium marinum (strain ATCC BAA-535 / M) GN=ctpC PE=3 SV=1	39	33	42.3	77.846	133.877	116.19	116.623	98.1413	0.867888	0.996288	0.841525
MMAR_3756	2308	B2HMF2	>tr|B2HMF2|B2HMF2_MYCMM Conserved hypothetical membrane protein OS=Mycobacterium marinum (strain ATCC BAA-535 / M) GN=MMAR_3756 PE=4 SV=1	19	19	44.6	50.153	25.3841	31.9158	32.0493	40.7489	1.25732	0.995835	1.27145
MMAR_0874	3330	B2HRL9	>tr|B2HRL9|B2HRL9_MYCMM ResB-family protein OS=Mycobacterium marinum (strain ATCC BAA-535 / M) GN=MMAR_0874 PE=4 SV=1	14	14	35.5	56.235	24.3113	20.1381	20.2527	12.4062	0.828343	0.994338	0.61257
alc	268	B2HDV2	>tr|B2HDV2|B2HDV2_MYCMM Probable allantoicase OS=Mycobacterium marinum (strain ATCC BAA-535 / M) GN=alc PE=3 SV=1	12	12	35.1	34.965	8.94424	5.67155	5.70782	10.3312	0.634101	0.993645	1.81001
qcrA	957	B2HGW3	>tr|B2HGW3|B2HGW3_MYCMM Rieske iron-sulfur protein QcrA OS=Mycobacterium marinum (strain ATCC BAA-535 / M) GN=qcrA PE=4 SV=1	29	29	62.4	43.115	132.907	150.854	151.831	127.972	1.13503	0.993565	0.842857
fadD7	2105	B2HLN7	>tr|B2HLN7|B2HLN7_MYCMM Fatty-acid-CoA ligase FadD7 OS=Mycobacterium marinum (strain ATCC BAA-535 / M) GN=fadD7 PE=4 SV=1	15	15	38.1	56.844	9.42331	8.24314	8.29797	11.3414	0.874761	0.993393	1.36677
pup	739	B2HFV7	>sp|B2HFV7|PUP_MYCMM Prokaryotic ubiquitin-like protein Pup OS=Mycobacterium marinum (strain ATCC BAA-535 / M) GN=pup PE=3 SV=1	4	4	34.4	6.9432	20.3411	20.1146	20.2527	21.1512	0.988864	0.99318	1.04436
rpoA	45	B2HCX4	>tr|B2HCX4|B2HCX4_MYCMM DNA-directed RNA polymerase subunit alpha OS=Mycobacterium marinum (strain ATCC BAA-535 / M) GN=rpoA PE=3 SV=1	28	28	63.7	37.741	74.0066	57.702	58.1153	50.5696	0.779687	0.992887	0.870159
rpsF	1344	B2HIB7	>tr|B2HIB7|B2HIB7_MYCMM 30S ribosomal protein S6 OS=Mycobacterium marinum (strain ATCC BAA-535 / M) GN=rpsF PE=3 SV=1	7	7	56.2	10.897	5.96665	6.19994	6.24695	10.8636	1.0391	0.992474	1.73903
MMAR_3035	575	B2HF54	>tr|B2HF54|B2HF54_MYCMM Conserved hypothetical membrane protein OS=Mycobacterium marinum (strain ATCC BAA-535 / M) GN=MMAR_3035 PE=4 SV=1	9	9	30.1	32.167	12.378	11.8012	11.902	12.3735	0.9534	0.991525	1.03961
MMAR_2552	3393	B2HRW9	>tr|B2HRW9|B2HRW9_MYCMM Conserved hypothetical membrane protein OS=Mycobacterium marinum (strain ATCC BAA-535 / M) GN=MMAR_2552 PE=4 SV=1	6	6	19	29.16	5.94372	6.72832	6.78608	13.9161	1.13201	0.991488	2.05068
MMAR_0067	1339	B2HIB2	>tr|B2HIB2|B2HIB2_MYCMM Conserved hypothetical membrane protein OS=Mycobacterium marinum (strain ATCC BAA-535 / M) GN=MMAR_0067 PE=4 SV=1	17	17	53.3	30.492	25.8287	21.1948	21.3838	22.7156	0.820592	0.991166	1.06228
rplA	3523	B2HSH2	>sp|B2HSH2|RL1_MYCMM 50S ribosomal protein L1 OS=Mycobacterium marinum (strain ATCC BAA-535 / M) GN=rplA PE=3 SV=1	23	23	68.9	24.801	61.9816	65.6043	66.1907	75.7725	1.05845	0.991141	1.14476
MMAR_4045	3016	B2HQG0	>tr|B2HQG0|B2HQG0_MYCMM Conserved protein OS=Mycobacterium marinum (strain ATCC BAA-535 / M) GN=MMAR_4045 PE=4 SV=1	7	6	24.7	25.949	12.9144	12.8579	12.9803	19.0762	0.99563	0.990573	1.46963
ctpI	1896	B2HKQ9	>tr|B2HKQ9|B2HKQ9_MYCMM Cation-transporter ATPase I CtpI OS=Mycobacterium marinum (strain ATCC BAA-535 / M) GN=ctpI PE=3 SV=1	63	63	34.9	167.13	110.159	112.245	113.377	96.5005	1.01893	0.990013	0.851149
MMAR_0823	3147	B2HQW3	>tr|B2HQW3|B2HQW3_MYCMM Conserved transmembrane protein OS=Mycobacterium marinum (strain ATCC BAA-535 / M) GN=MMAR_0823 PE=4 SV=1	16	16	51.1	37.504	33.7346	35.6379	36.0342	35.5888	1.05642	0.989003	0.987638
rpsZ	7	B2HCT4	>sp|B2HCT4|RS14Z_MYCMM 30S ribosomal protein S14 type Z OS=Mycobacterium marinum (strain ATCC BAA-535 / M) GN=rpsZ PE=3 SV=1	3	3	44.3	6.8662	21.8357	22.78	23.0539	32.6564	1.04325	0.988119	1.41652
lysX	3187	B2HR11	>sp|B2HR11|LYSX_MYCMM Lysylphosphatidylglycerol biosynthesis bifunctional protein LysX OS=Mycobacterium marinum (strain ATCC BAA-535 / M) GN=lysX PE=3 SV=2	35	35	30	121.09	47.5956	54.7661	55.4313	67.6145	1.15065	0.988	1.21979
rplC	3570	B2HSN1	>sp|B2HSN1|RL3_MYCMM 50S ribosomal protein L3 OS=Mycobacterium marinum (strain ATCC BAA-535 / M) GN=rplC PE=3 SV=1	19	19	61.3	23.036	64.9592	61.8822	62.6394	63.4318	0.952632	0.987911	1.01265
MMAR_5035	1279	B2HI39	>tr|B2HI39|B2HI39_MYCMM Uncharacterized protein OS=Mycobacterium marinum (strain ATCC BAA-535 / M) GN=MMAR_5035 PE=4 SV=1	19	19	72.8	17.307	23.7863	22.8738	23.1594	22.2269	0.961635	0.987667	0.959735
yajC	2497	B2HN71	>tr|B2HN71|B2HN71_MYCMM Conserved membrane protein secretion factor YajC OS=Mycobacterium marinum (strain ATCC BAA-535 / M) GN=yajC PE=4 SV=1	6	6	44.2	12.524	27.745	29.4614	29.84	40.2929	1.06186	0.987314	1.3503
tuf	3559	B2HSL3	>sp|B2HSL3|EFTU_MYCMM Elongation factor Tu OS=Mycobacterium marinum (strain ATCC BAA-535 / M) GN=tuf PE=3 SV=1	35	35	88.6	43.805	198.586	200.465	203.055	244.059	1.00946	0.987243	1.20194
mprB	373	B2HEA9	>tr|B2HEA9|B2HEA9_MYCMM Two-component sensor kinase MprB OS=Mycobacterium marinum (strain ATCC BAA-535 / M) GN=mprB PE=4 SV=1	21	21	46.4	54.584	32.7764	31.5281	31.9438	37.1532	0.961913	0.986987	1.16308
cydA	3170	B2HQZ0	>tr|B2HQZ0|B2HQZ0_MYCMM Integral membrane cytochrome D ubiquinol oxidase (Subunit I) CydA OS=Mycobacterium marinum (strain ATCC BAA-535 / M) GN=cydA PE=4 SV=1	7	7	19.2	54.219	9.42331	12.9048	13.0858	19.1199	1.36946	0.98617	1.46112
pknA	1300	B2HI62	>tr|B2HI62|B2HI62_MYCMM Serine/threonine-protein kinase a PknA OS=Mycobacterium marinum (strain ATCC BAA-535 / M) GN=pknA PE=4 SV=1	20	20	45.4	48.085	92.3168	96.851	98.2927	84.0943	1.04912	0.985333	0.855549
MMAR_1370	664	B2HFI4	>tr|B2HFI4|B2HFI4_MYCMM Serine protease OS=Mycobacterium marinum (strain ATCC BAA-535 / M) GN=MMAR_1370 PE=4 SV=1	17	17	47.1	35.307	40.6938	47.6032	48.3582	43.845	1.16979	0.984386	0.906671
fadE24	862	B2HGH5	>tr|B2HGH5|B2HGH5_MYCMM Acyl-CoA dehydrogenase FadE24 OS=Mycobacterium marinum (strain ATCC BAA-535 / M) GN=fadE24 PE=3 SV=1	22	22	36.6	49.774	43.5796	36.6478	37.2707	32.58	0.840939	0.983287	0.874144
ctpV	1004	B2HH25	>tr|B2HH25|B2HH25_MYCMM Metal cation transporter p-type ATPase, CtpV OS=Mycobacterium marinum (strain ATCC BAA-535 / M) GN=ctpV PE=3 SV=1	41	31	45.8	82.941	63.4646	62.9858	64.0869	46.9848	0.992455	0.982818	0.733141
rplV	3575	B2HSN6	>sp|B2HSN6|RL22_MYCMM 50S ribosomal protein L22 OS=Mycobacterium marinum (strain ATCC BAA-535 / M) GN=rplV PE=3 SV=1	13	13	43.2	18.638	45.1315	57.8426	58.8655	67.6036	1.28165	0.982624	1.14844
pepA	973	B2HGY2	>sp|B2HGY2|AMPA_MYCMM Probable cytosol aminopeptidase OS=Mycobacterium marinum (strain ATCC BAA-535 / M) GN=pepA PE=3 SV=1	29	29	62.2	53.538	141.35	140.508	142.994	161.508	0.994049	0.982617	1.12947
ponA2	1786	B2HK80	>tr|B2HK80|B2HK80_MYCMM Bifunctional membrane-associated penicillin-binding protein 1A/1B PonA2 OS=Mycobacterium marinum (strain ATCC BAA-535 / M) GN=ponA2 PE=4 SV=1	50	50	62	84.381	96.1608	113.783	115.797	104.931	1.18326	0.982605	0.906167
MMAR_3676	2029	B2HLB6	>tr|B2HLB6|B2HLB6_MYCMM Conserved hypothetical membrane protein OS=Mycobacterium marinum (strain ATCC BAA-535 / M) GN=MMAR_3676 PE=4 SV=1	10	10	21.1	47.291	12.8914	14.4431	14.7032	13.9597	1.12036	0.98231	0.949436
dxs1	2203	B2HM18	>tr|B2HM18|B2HM18_MYCMM 1-deoxy-D-xylulose-5-phosphate synthase OS=Mycobacterium marinum (strain ATCC BAA-535 / M) GN=dxs1 PE=3 SV=1	28	28	47.7	67.704	26.7983	39.4304	40.1774	23.7804	1.47138	0.981408	0.591886
MMAR_3732	2289	B2HMC8	>tr|B2HMC8|B2HMC8_MYCMM Uncharacterized protein OS=Mycobacterium marinum (strain ATCC BAA-535 / M) GN=MMAR_3732 PE=4 SV=1	27	27	47.2	62.268	27.8367	24.7294	25.2104	22.1942	0.888374	0.98092	0.880356
MMAR_1486	846	B2HGF1	>tr|B2HGF1|B2HGF1_MYCMM Two-component system response regulator OS=Mycobacterium marinum (strain ATCC BAA-535 / M) GN=MMAR_1486 PE=4 SV=1	4	4	40.3	15.84	8.40785	7.23326	7.37797	11.3087	0.860299	0.980387	1.53277
eccB5	3853	P9WNQ9	>sp|P9WNQ9|ECCB5_MYCTU ESX-5 secretion system protein eccB5 OS=Mycobacterium tuberculosis (strain ATCC 25618 / H37Rv) GN=eccB5 PE=1 SV=1	23	14	51.2	53.721	0.981065	0.528385	0.53913	37.1532	0.538583	0.980069	68.9132
whiA	2733	B2HP75	>sp|B2HP75|WHIA_MYCMM Putative sporulation transcription regulator WhiA OS=Mycobacterium marinum (strain ATCC BAA-535 / M) GN=whiA PE=3 SV=1	22	22	54.5	34.864	40.2262	29.8257	30.4846	35.6106	0.74145	0.978385	1.16815
MMAR_3775	2324	B2HMH1	>tr|B2HMH1|B2HMH1_MYCMM Conserved membrane protein OS=Mycobacterium marinum (strain ATCC BAA-535 / M) GN=MMAR_3775 PE=4 SV=1	24	24	42.6	44.461	39.6668	38.6676	39.5327	39.2172	0.974808	0.978115	0.992019
MMAR_0070	1342	B2HIB5	>tr|B2HIB5|B2HIB5_MYCMM Conserved hypothetical transmembrane protein OS=Mycobacterium marinum (strain ATCC BAA-535 / M) GN=MMAR_0070 PE=4 SV=1	11	11	22.7	60.058	10.4388	9.32335	9.53449	9.28829	0.893147	0.977856	0.974178
fadD5	2397	B2HMT7	>tr|B2HMT7|B2HMT7_MYCMM Fatty-acid-CoA ligase FadD5 OS=Mycobacterium marinum (strain ATCC BAA-535 / M) GN=fadD5 PE=4 SV=1	10	10	18.8	59.547	7.92878	8.26659	8.45623	7.72387	1.0426	0.977573	0.913394
lprH	2729	B2HP70	>tr|B2HP70|B2HP70_MYCMM Lipoprotein LprH OS=Mycobacterium marinum (strain ATCC BAA-535 / M) GN=lprH PE=4 SV=1	6	6	47.5	22.95	4.97412	8.26659	8.45623	10.2767	1.66192	0.977573	1.21528
MMAR_0060	1332	B2HIA5	>tr|B2HIA5|B2HIA5_MYCMM Glutamine ABC transporter, ATP-binding protein OS=Mycobacterium marinum (strain ATCC BAA-535 / M) GN=MMAR_0060 PE=3 SV=1	13	13	53.8	26.99	14.888	16.0048	16.3733	18.066	1.07502	0.977491	1.10338
MMAR_4461	176	B2HDI4	>tr|B2HDI4|B2HDI4_MYCMM Conserved membrane protein OS=Mycobacterium marinum (strain ATCC BAA-535 / M) GN=MMAR_4461 PE=4 SV=1	12	12	33.9	24.848	26.3078	23.743	24.2904	25.2575	0.902508	0.977463	1.03981
MMAR_3854	2606	B2HNL2	>tr|B2HNL2|B2HNL2_MYCMM Conserved proline rich membrane protein OS=Mycobacterium marinum (strain ATCC BAA-535 / M) GN=MMAR_3854 PE=4 SV=1	5	5	21.3	27.299	8.93278	6.10615	6.24695	7.23514	0.683567	0.977461	1.15819
lipO	2735	B2HP77	>tr|B2HP77|B2HP77_MYCMM Esterase LipO OS=Mycobacterium marinum (strain ATCC BAA-535 / M) GN=lipO PE=4 SV=1	13	13	27.2	47.321	22.3262	24.8232	25.4214	23.7586	1.11184	0.976467	0.934588
MMAR_5474	2631	B2HNS5	>tr|B2HNS5|B2HNS5_MYCMM Conserved transmembrane protein OS=Mycobacterium marinum (strain ATCC BAA-535 / M) GN=MMAR_5474 PE=4 SV=1	30	30	25	122.35	68.4617	75.3857	77.2255	69.168	1.10114	0.976176	0.895663
MMAR_4057	3028	B2HQH2	>tr|B2HQH2|B2HQH2_MYCMM Conserved Mce associated membrane protein OS=Mycobacterium marinum (strain ATCC BAA-535 / M) GN=MMAR_4057 PE=4 SV=1	12	12	43.9	25.721	25.3153	28.933	29.6817	29.9071	1.14291	0.974776	1.00759
dapA	1947	B2HKZ1	>tr|B2HKZ1|B2HKZ1_MYCMM Dihydrodipicolinate synthase OS=Mycobacterium marinum (strain ATCC BAA-535 / M) GN=dapA PE=3 SV=1	14	14	48.7	30.738	6.45718	6.65798	6.83884	6.71367	1.0311	0.973555	0.981697
rnz	2285	B2HMC3	>sp|B2HMC3|RNZ_MYCMM Ribonuclease Z OS=Mycobacterium marinum (strain ATCC BAA-535 / M) GN=rnz PE=3 SV=1	8	8	25.1	29.291	5.44172	6.70488	6.89159	5.14925	1.23212	0.972907	0.747178
gltA2	597	B2HF81	>tr|B2HF81|B2HF81_MYCMM Citrate synthase OS=Mycobacterium marinum (strain ATCC BAA-535 / M) GN=gltA2 PE=3 SV=1	26	25	49.7	48.217	55.0453	43.928	45.1878	54.7305	0.798032	0.97212	1.21118
purT	2871	B2HPW8	>tr|B2HPW8|B2HPW8_MYCMM Formate-dependent phosphoribosylglycinamide formyltransferase PurT OS=Mycobacterium marinum (strain ATCC BAA-535 / M) GN=purT PE=3 SV=1	11	11	34.8	46.056	13.3934	18.1652	18.6881	22.7266	1.35628	0.97202	1.2161
lppI	563	B2HF40	>tr|B2HF40|B2HF40_MYCMM Lipoprotein LppI OS=Mycobacterium marinum (strain ATCC BAA-535 / M) GN=lppI PE=4 SV=1	5	5	34.1	22.982	6.95918	8.26659	8.50898	7.72387	1.18787	0.971513	0.907731
lppU	1925	B2HKV1	>tr|B2HKV1|B2HKV1_MYCMM Lipoprotein LppU OS=Mycobacterium marinum (strain ATCC BAA-535 / M) GN=lppU PE=4 SV=1	10	10	63.8	18.356	17.8656	16.5801	17.0707	9.27738	0.928047	0.971257	0.543467
rpsC	3576	B2HSN7	>sp|B2HSN7|RS3_MYCMM 30S ribosomal protein S3 OS=Mycobacterium marinum (strain ATCC BAA-535 / M) GN=rpsC PE=3 SV=1	53	53	90.2	30.209	183.63	207.628	213.92	219.312	1.13069	0.970586	1.02521
lpqZ	3298	B2HRH3	>tr|B2HRH3|B2HRH3_MYCMM Lipoprotein LpqZ OS=Mycobacterium marinum (strain ATCC BAA-535 / M) GN=lpqZ PE=4 SV=1	8	8	30.7	28.816	9.40038	7.25671	7.48348	5.70347	0.771959	0.969697	0.762142
MMAR_1809	1651	B2HJM2	>tr|B2HJM2|B2HJM2_MYCMM Uncharacterized protein OS=Mycobacterium marinum (strain ATCC BAA-535 / M) GN=MMAR_1809 PE=4 SV=1	14	11	28.8	49.779	15.8805	20.185	20.8446	23.7477	1.27105	0.968353	1.13927
cya_1	2856	B2HPV0	>tr|B2HPV0|B2HPV0_MYCMM Membrane-anchored adenylyl cyclase Cya_1 OS=Mycobacterium marinum (strain ATCC BAA-535 / M) GN=cya_1 PE=4 SV=1	15	15	37.6	47.631	19.3372	21.2183	21.9229	22.6938	1.09728	0.96786	1.03516
MMAR_2146	2515	B2HN97	>tr|B2HN97|B2HN97_MYCMM Uncharacterized protein OS=Mycobacterium marinum (strain ATCC BAA-535 / M) GN=MMAR_2146 PE=4 SV=1	12	12	68.8	9.6088	53.1061	45.9712	47.5026	68.4526	0.865647	0.967761	1.44103
MMAR_3288	1141	B2HHL6	>tr|B2HHL6|B2HHL6_MYCMM Conserved membrane protein OS=Mycobacterium marinum (strain ATCC BAA-535 / M) GN=MMAR_3288 PE=4 SV=1	5	5	22.9	14.623	13.3705	11.4134	11.7965	10.3312	0.853629	0.967527	0.875787
ctaE	955	B2HGW1	>tr|B2HGW1|B2HGW1_MYCMM Cytochrome C oxidase (Subunit III) CtaE OS=Mycobacterium marinum (strain ATCC BAA-535 / M) GN=ctaE PE=3 SV=1	3	3	10.8	22.416	12.9144	16.6035	17.1762	11.8847	1.28566	0.966656	0.69193
rpmB2_1	1405	B2HIJ5	>tr|B2HIJ5|B2HIJ5_MYCMM 50S ribosomal protein L28 OS=Mycobacterium marinum (strain ATCC BAA-535 / M) GN=rpmB2_1 PE=3 SV=1	8	8	59.4	6.8809	18.3217	20.7134	21.4365	48.2024	1.13054	0.966265	2.24861
trcS	172	B2HDH9	>tr|B2HDH9|B2HDH9_MYCMM Two-component sensor histidine kinase TrcS OS=Mycobacterium marinum (strain ATCC BAA-535 / M) GN=trcS PE=4 SV=1	13	13	36.8	55.525	30.2779	30.3306	31.4046	20.6297	1.00174	0.965801	0.656901
ftsY	1632	B2HJJ9	>tr|B2HJJ9|B2HJJ9_MYCMM Signal recognition particle receptor FtsY OS=Mycobacterium marinum (strain ATCC BAA-535 / M) GN=ftsY PE=3 SV=1	23	23	44.5	47.671	57.0877	54.1908	56.1171	45.4313	0.949256	0.965675	0.80958
lipE	2082	B2HLK2	>tr|B2HLK2|B2HLK2_MYCMM Lipase LipE OS=Mycobacterium marinum (strain ATCC BAA-535 / M) GN=lipE PE=4 SV=1	23	23	59.2	45.24	19.3028	21.2417	22.0284	19.0871	1.10045	0.964289	0.866479
lpqU	178	B2HDI6	>tr|B2HDI6|B2HDI6_MYCMM Conserved lipoprotein LpqU OS=Mycobacterium marinum (strain ATCC BAA-535 / M) GN=lpqU PE=4 SV=1	7	7	39.5	26.068	7.46118	8.77152	9.10087	11.8629	1.17562	0.963812	1.30349
pstP	1303	B2HI65	>tr|B2HI65|B2HI65_MYCMM Serine/threonine phosphatase PstP OS=Mycobacterium marinum (strain ATCC BAA-535 / M) GN=pstP PE=4 SV=1	18	18	38.3	54.5	88.3582	87.351	90.7681	88.8312	0.988601	0.962353	0.978661
folE	1564	B2HJ53	>sp|B2HJ53|GCH1_MYCMM GTP cyclohydrolase 1 OS=Mycobacterium marinum (strain ATCC BAA-535 / M) GN=folE PE=3 SV=1	12	12	39.6	22.272	10.4388	10.3098	10.7183	11.8411	0.987644	0.96189	1.10476
MMAR_2610	3423	B2HS26	>tr|B2HS26|B2HS26_MYCMM Aldehyde dehydrogenase OS=Mycobacterium marinum (strain ATCC BAA-535 / M) GN=MMAR_2610 PE=3 SV=1	10	9	20.8	51.977	12.9373	10.3567	10.771	10.82	0.800529	0.961533	1.00455
sdhA	261	B2HDU3	>tr|B2HDU3|B2HDU3_MYCMM Succinate dehydrogenase (Flavoprotein subunit) SdhA OS=Mycobacterium marinum (strain ATCC BAA-535 / M) GN=sdhA PE=4 SV=1	34	34	53.3	64.337	132.532	134.449	139.835	139.423	1.01447	0.961483	0.997049
dhmA	1690	B2HJU9	>sp|B2HJU9|DHMA_MYCMM Haloalkane dehalogenase OS=Mycobacterium marinum (strain ATCC BAA-535 / M) GN=dhmA PE=3 SV=1	16	16	54.9	32.818	20.3526	30.4479	31.7212	32.0585	1.49602	0.95986	1.01064
MMAR_4207	3430	B2HS37	>tr|B2HS37|B2HS37_MYCMM Conserved hypothetical membrane protein OS=Mycobacterium marinum (strain ATCC BAA-535 / M) GN=MMAR_4207 PE=4 SV=1	12	12	42.3	18.473	35.7426	40.4168	42.1229	49.6249	1.13078	0.959498	1.1781
tpiA	2743	B2HP86	>sp|B2HP86|TPIS_MYCMM Triosephosphate isomerase OS=Mycobacterium marinum (strain ATCC BAA-535 / M) GN=tpiA PE=3 SV=1	13	13	56.7	27.325	15.367	11.8715	12.3884	12.3735	0.77253	0.958275	0.998795
MMAR_5004	1253	B2HI08	>tr|B2HI08|B2HI08_MYCMM Uncharacterized protein OS=Mycobacterium marinum (strain ATCC BAA-535 / M) GN=MMAR_5004 PE=4 SV=1	17	17	67.8	25.668	36.2446	35.7786	37.3762	32.9486	0.987144	0.957256	0.88154
MMAR_5340	2090	B2HLL2	>tr|B2HLL2|B2HLL2_MYCMM Uncharacterized protein OS=Mycobacterium marinum (strain ATCC BAA-535 / M) GN=MMAR_5340 PE=4 SV=1	17	17	46.4	49.684	22.3262	21.2183	22.1867	25.2903	0.950376	0.956354	1.13989
lppM	935	B2HGS9	>tr|B2HGS9|B2HGS9_MYCMM Conserved lipoprotein LppM OS=Mycobacterium marinum (strain ATCC BAA-535 / M) GN=lppM PE=4 SV=1	7	7	26.4	25.576	21.3337	21.6763	22.673	23.2044	1.01606	0.95604	1.02343
mce1B	2401	B2HMU1	>tr|B2HMU1|B2HMU1_MYCMM MCE-family protein Mce1B OS=Mycobacterium marinum (strain ATCC BAA-535 / M) GN=mce1B PE=4 SV=1	27	27	55.8	37.688	91.918	103.614	108.472	76.9137	1.12724	0.955213	0.709066
sdhB	260	B2HDU2	>tr|B2HDU2|B2HDU2_MYCMM Succinate dehydrogenase (Iron-sulphur protein subunit) SdhB OS=Mycobacterium marinum (strain ATCC BAA-535 / M) GN=sdhB PE=4 SV=1	23	23	54.8	29.982	55.49	58.4883	61.2858	53.1224	1.05403	0.954353	0.866798
MMAR_2024	2195	B2HM10	>tr|B2HM10|B2HM10_MYCMM Conserved integral membrane alanine, valine and leucine rich protein OS=Mycobacterium marinum (strain ATCC BAA-535 / M) GN=MMAR_2024 PE=4 SV=1	19	19	18	71.823	35.2406	42.8243	44.9768	51.5798	1.2152	0.952142	1.14681
losA	2911	B2HQ19	>tr|B2HQ19|B2HQ19_MYCMM Glycosyltransferase, LosA OS=Mycobacterium marinum (strain ATCC BAA-535 / M) GN=losA PE=4 SV=1	7	7	20.1	38.554	13.8725	17.6837	18.5826	8.81048	1.27473	0.951628	0.474125
MMAR_2747	100	B2HD52	>tr|B2HD52|B2HD52_MYCMM Uncharacterized protein OS=Mycobacterium marinum (strain ATCC BAA-535 / M) GN=MMAR_2747 PE=4 SV=1	15	15	32.3	74.425	15.367	15.5233	16.3206	19.6086	1.01017	0.951149	1.20147
MMAR_4654	609	B2HF95	>tr|B2HF95|B2HF95_MYCMM Conserved protein OS=Mycobacterium marinum (strain ATCC BAA-535 / M) GN=MMAR_4654 PE=4 SV=1	10	10	76.2	17.025	20.3182	18.1652	19.1217	16.0129	0.894036	0.949978	0.837418
pknH_1	3274	B2HRE5	>tr|B2HRE5|B2HRE5_MYCMM Transmembrane serine/threonine-protein kinase H, PknH_1 OS=Mycobacterium marinum (strain ATCC BAA-535 / M) GN=pknH_1 PE=3 SV=1	21	15	35.5	65.903	16.371	16.0517	16.9125	29.4075	0.980493	0.949104	1.73881
nuoD	841	B2HGE5	>sp|B2HGE5|NUOD_MYCMM NADH-quinone oxidoreductase subunit D OS=Mycobacterium marinum (strain ATCC BAA-535 / M) GN=nuoD PE=3 SV=1	27	27	61.3	47.502	72.5235	72.4733	76.3698	73.3071	0.999307	0.948978	0.959896
MMAR_3298	1150	B2HHM6	>tr|B2HHM6|B2HHM6_MYCMM Uncharacterized protein OS=Mycobacterium marinum (strain ATCC BAA-535 / M) GN=MMAR_3298 PE=4 SV=1	12	12	26.6	49.786	17.877	18.0949	19.069	23.2371	1.01219	0.948917	1.21858
MMAR_3652	2012	B2HL92	>tr|B2HL92|B2HL92_MYCMM Conserved hypothetical secreted protein OS=Mycobacterium marinum (strain ATCC BAA-535 / M) GN=MMAR_3652 PE=4 SV=1	34	34	40.8	69.774	82.38	76.3956	80.5246	66.6043	0.927355	0.948723	0.82713
cycA	47	B2HCX7	>tr|B2HCX7|B2HCX7_MYCMM D-serine/D-alanine/glycine transporter, CycA OS=Mycobacterium marinum (strain ATCC BAA-535 / M) GN=cycA PE=4 SV=1	6	6	15.1	52.619	58.149	58.8525	62.1003	40.2274	1.0121	0.947702	0.647782
MMAR_1258	439	B2HEK9	>tr|B2HEK9|B2HEK9_MYCMM Conserved hypothetical membrane protein OS=Mycobacterium marinum (strain ATCC BAA-535 / M) GN=MMAR_1258 PE=4 SV=1	4	4	20.3	19.739	10.8949	12.3764	13.0858	13.9488	1.13598	0.945791	1.06595
MMAR_4508	214	B2HDN0	>tr|B2HDN0|B2HDN0_MYCMM Conserved membrane protein OS=Mycobacterium marinum (strain ATCC BAA-535 / M) GN=MMAR_4508 PE=4 SV=1	18	18	32.3	68.436	34.6469	37.2231	39.3745	33.5138	1.07436	0.945361	0.851155
rpsD	44	B2HCX3	>sp|B2HCX3|RS4_MYCMM 30S ribosomal protein S4 OS=Mycobacterium marinum (strain ATCC BAA-535 / M) GN=rpsD PE=3 SV=1	27	27	86.1	23.408	107.159	104.366	110.406	94.9252	0.973933	0.945292	0.859785
MMAR_4962	1218	B2HHW6	>tr|B2HHW6|B2HHW6_MYCMM C4-dicarboxylate transporter/malic acid transport protein OS=Mycobacterium marinum (strain ATCC BAA-535 / M) GN=MMAR_4962 PE=4 SV=1	3	3	10.2	40.133	12.4238	16.0751	17.018	17.034	1.29389	0.944597	1.00094
MMAR_1756	1419	B2HIL1	>tr|B2HIL1|B2HIL1_MYCMM Uncharacterized protein OS=Mycobacterium marinum (strain ATCC BAA-535 / M) GN=MMAR_1756 PE=4 SV=1	18	18	63.4	29.931	52.5697	45.7836	48.5281	50.9273	0.870912	0.943445	1.04944
MMAR_3835	2594	B2HNJ2	>tr|B2HNJ2|B2HNJ2_MYCMM Conserved hypothetical membrane protein OS=Mycobacterium marinum (strain ATCC BAA-535 / M) GN=MMAR_3835 PE=4 SV=1	15	15	33.3	51.762	23.3531	17.5196	18.5826	10.3312	0.750203	0.942796	0.555963
phoR	1200	B2HHU5	>tr|B2HHU5|B2HHU5_MYCMM Two-component system response phosphate sensor kinase, PhoR OS=Mycobacterium marinum (strain ATCC BAA-535 / M) GN=phoR PE=4 SV=1	19	19	47.8	51.223	38.1952	40.4168	42.873	42.8566	1.05816	0.94271	0.999618
MMAR_2140	2512	B2HN91	>tr|B2HN91|B2HN91_MYCMM Metal cation transporter p-type ATPase OS=Mycobacterium marinum (strain ATCC BAA-535 / M) GN=MMAR_2140 PE=3 SV=1	25	25	36.1	79.972	56.5513	54.6723	58.0098	44.8989	0.966774	0.942467	0.773987
pstS2	409	B2HEF6	>tr|B2HEF6|B2HEF6_MYCMM Periplasmic phosphate-binding lipoprotein PstS2 OS=Mycobacterium marinum (strain ATCC BAA-535 / M) GN=pstS2 PE=4 SV=1	16	16	46.5	38.604	40.1918	45.102	47.8835	54.1872	1.12217	0.941911	1.13165
MMAR_3700	2264	B2HM96	>tr|B2HM96|B2HM96_MYCMM Short-chain membrane-associated dehydrogenase OS=Mycobacterium marinum (strain ATCC BAA-535 / M) GN=MMAR_3700 PE=3 SV=1	11	11	29	29.71	13.4164	16.4863	17.5043	21.6399	1.22882	0.941839	1.23626
MMAR_4272	3469	B2HSA3	>tr|B2HSA3|B2HSA3_MYCMM Conserved hypothetical membrane protein OS=Mycobacterium marinum (strain ATCC BAA-535 / M) GN=MMAR_4272 PE=4 SV=1	21	21	29.6	100.53	13.382	14.5134	15.4122	15.4914	1.08455	0.941686	1.00514
MMAR_2897	333	B2HE57	>tr|B2HE57|B2HE57_MYCMM Conserved hypothetical secreted protein OS=Mycobacterium marinum (strain ATCC BAA-535 / M) GN=MMAR_2897 PE=4 SV=1	13	13	51.5	29.139	19.8506	22.2047	23.593	25.8008	1.11859	0.941156	1.09358
MMAR_1900	1910	B2HKS8	>tr|B2HKS8|B2HKS8_MYCMM ABC-type sugar transport protein OS=Mycobacterium marinum (strain ATCC BAA-535 / M) GN=MMAR_1900 PE=4 SV=1	14	14	40.3	48.164	9.44624	11.2962	12.0075	8.27809	1.19584	0.940761	0.689408
rpsJ	3569	B2HSN0	>sp|B2HSN0|RS10_MYCMM 30S ribosomal protein S10 OS=Mycobacterium marinum (strain ATCC BAA-535 / M) GN=rpsJ PE=3 SV=1	18	18	86.1	11.431	56.6889	86.4818	91.9287	120.423	1.52555	0.940749	1.30996
embC	2335	B2HMJ0	>tr|B2HMJ0|B2HMJ0_MYCMM Integral membrane indolylacetylinositol arabinosyltransferase EmbC OS=Mycobacterium marinum (strain ATCC BAA-535 / M) GN=embC PE=4 SV=1	37	37	32.5	116.68	58.0917	59.9796	63.7588	61.911	1.0325	0.940727	0.971019
atpFH	3054	B2HQK5	>sp|B2HQK5|ATPFD_MYCMM ATP synthase subunit b-delta OS=Mycobacterium marinum (strain ATCC BAA-535 / M) GN=atpFH PE=3 SV=1	44	44	79.1	47.956	264.994	293.053	311.82	234.337	1.10588	0.939813	0.751513
echA3	3512	B2HSG1	>tr|B2HSG1|B2HSG1_MYCMM Enoyl-CoA hydratase, EchA3 OS=Mycobacterium marinum (strain ATCC BAA-535 / M) GN=echA3 PE=1 SV=1	9	9	42	24.426	15.4014	18.6233	19.8191	23.704	1.20919	0.939661	1.19602
MMAR_4356	3680	B2HT42	>tr|B2HT42|B2HT42_MYCMM Conserved protein OS=Mycobacterium marinum (strain ATCC BAA-535 / M) GN=MMAR_4356 PE=4 SV=1	11	11	59	22.036	23.3417	25.4454	27.0916	21.1185	1.09013	0.939235	0.779521
ftsQ	921	B2HGR4	>tr|B2HGR4|B2HGR4_MYCMM Cell division protein FtsQ OS=Mycobacterium marinum (strain ATCC BAA-535 / M) GN=ftsQ PE=3 SV=1	14	14	35.8	34.03	22.3033	20.1615	21.4893	14.4375	0.903971	0.938214	0.671849
MMAR_2574	3404	B2HRZ0	>tr|B2HRZ0|B2HRZ0_MYCMM Sugar transporter OS=Mycobacterium marinum (strain ATCC BAA-535 / M) GN=MMAR_2574 PE=4 SV=1	9	9	14.3	54.272	18.8466	24.2948	25.9078	29.9399	1.28908	0.937741	1.15563
rplK	3522	B2HSH1	>sp|B2HSH1|RL11_MYCMM 50S ribosomal protein L11 OS=Mycobacterium marinum (strain ATCC BAA-535 / M) GN=rplK PE=3 SV=1	12	12	71.1	14.947	27.7909	26.4552	28.2226	30.3958	0.951941	0.937378	1.077
MMAR_4518	365	B2HE99	>tr|B2HE99|B2HE99_MYCMM Conserved hypothetical transmembrane protein OS=Mycobacterium marinum (strain ATCC BAA-535 / M) GN=MMAR_4518 PE=4 SV=1	5	5	16.3	43.343	22.8053	21.0776	22.5148	15.9801	0.924243	0.936168	0.709762
MMAR_2647	3602	B2HSR9	>tr|B2HSR9|B2HSR9_MYCMM Conserved membrane protein OS=Mycobacterium marinum (strain ATCC BAA-535 / M) GN=MMAR_2647 PE=4 SV=1	19	19	54.6	43.424	67.0474	56.6218	60.4829	44.3992	0.844503	0.936162	0.734079
disA	1541	B2HJ27	>tr|B2HJ27|B2HJ27_MYCMM DNA integrity scanning protein DisA OS=Mycobacterium marinum (strain ATCC BAA-535 / M) GN=disA PE=3 SV=1	11	11	38.5	39.172	10.9178	6.15305	6.57507	5.13833	0.563577	0.935815	0.781487
MMAR_4657	612	B2HF98	>tr|B2HF98|B2HF98_MYCMM Conserved exported protein OS=Mycobacterium marinum (strain ATCC BAA-535 / M) GN=MMAR_4657 PE=4 SV=1	9	9	65.4	18.01	18.881	19.68	21.0556	18.5984	1.04232	0.934668	0.883298
infB	1907	B2HKS2	>sp|B2HKS2|IF2_MYCMM Translation initiation factor IF-2 OS=Mycobacterium marinum (strain ATCC BAA-535 / M) GN=infB PE=3 SV=1	46	46	50.7	98.16	80.3721	71.3227	76.3287	65.5177	0.887407	0.934416	0.858363
MMAR_3226	945	B2HGU9	>tr|B2HGU9|B2HGU9_MYCMM 1-acylglycerol-3-phosphate O-acyltransferase OS=Mycobacterium marinum (strain ATCC BAA-535 / M) GN=MMAR_3226 PE=4 SV=1	14	14	54.3	26.638	20.3182	18.0011	19.28	19.6086	0.885958	0.933667	1.01704
lppZ	1375	B2HIG1	>tr|B2HIG1|B2HIG1_MYCMM Conserved lipoprotein LppZ OS=Mycobacterium marinum (strain ATCC BAA-535 / M) GN=lppZ PE=4 SV=1	15	15	36.7	38.906	26.7869	27.8997	29.8927	30.961	1.04155	0.933328	1.03574
MMAR_4036	3008	B2HQF1	>tr|B2HQF1|B2HQF1_MYCMM Transmembrane ATP-binding protein ABC transporter OS=Mycobacterium marinum (strain ATCC BAA-535 / M) GN=MMAR_4036 PE=3 SV=1	16	16	27.5	61.04	29.2625	34.5812	37.1125	33.5138	1.18176	0.931794	0.903033
secY	25	B2HCV4	>tr|B2HCV4|B2HCV4_MYCMM Protein translocase subunit SecY OS=Mycobacterium marinum (strain ATCC BAA-535 / M) GN=secY PE=3 SV=1	16	16	25.6	47.687	28.2585	36.1429	38.8353	42.2806	1.27901	0.930669	1.08871
gltB_1	280	B2HDW8	>tr|B2HDW8|B2HDW8_MYCMM Glutamate synthase, GltB_1 OS=Mycobacterium marinum (strain ATCC BAA-535 / M) GN=gltB_1 PE=3 SV=1	16	16	37.4	54.3	26.3078	21.6763	23.3704	15.5023	0.823951	0.927511	0.663331
atpA	3053	B2HQK4	>sp|B2HQK4|ATPA_MYCMM ATP synthase subunit alpha OS=Mycobacterium marinum (strain ATCC BAA-535 / M) GN=atpA PE=3 SV=1	58	58	65.8	59.53	408.435	426.104	459.497	374.726	1.04326	0.927328	0.815514
MMAR_2921	350	B2HE80	>tr|B2HE80|B2HE80_MYCMM Uncharacterized protein OS=Mycobacterium marinum (strain ATCC BAA-535 / M) GN=MMAR_2921 PE=4 SV=1	8	8	62	9.8381	25.2579	27.8997	30.1038	65.4329	1.10459	0.926785	2.17358
MMAR_2016	2187	B2HM02	>tr|B2HM02|B2HM02_MYCMM Conserved hypothetical membrane protein OS=Mycobacterium marinum (strain ATCC BAA-535 / M) GN=MMAR_2016 PE=4 SV=1	2	2	11.3	17.681	6.45718	5.14317	5.54956	5.64889	0.796504	0.92677	1.0179
MMAR_0982	3530	B2HSI0	>tr|B2HSI0|B2HSI0_MYCMM Uncharacterized protein OS=Mycobacterium marinum (strain ATCC BAA-535 / M) GN=MMAR_0982 PE=4 SV=1	30	30	59.7	51.189	33.769	31.4812	33.9832	39.1954	0.932252	0.926376	1.15338
MMAR_2106	2486	B2HN58	>tr|B2HN58|B2HN58_MYCMM Uncharacterized protein OS=Mycobacterium marinum (strain ATCC BAA-535 / M) GN=MMAR_2106 PE=4 SV=1	5	5	36.4	15.072	6.44572	7.23326	7.81159	9.27738	1.12218	0.925965	1.18764
MMAR_3714	2274	B2HMB0	>tr|B2HMB0|B2HMB0_MYCMM Conserved hypothetical membrane protein OS=Mycobacterium marinum (strain ATCC BAA-535 / M) GN=MMAR_3714 PE=4 SV=1	5	5	15	68.084	5.47612	6.22339	6.73333	6.18128	1.13646	0.924265	0.918012
pknB	1299	B2HI61	>tr|B2HI61|B2HI61_MYCMM Serine/threonine-protein kinase B PknB OS=Mycobacterium marinum (strain ATCC BAA-535 / M) GN=pknB PE=4 SV=1	32	32	48.9	66.482	93.2406	106.526	115.258	84.6813	1.14249	0.924241	0.734711
hns	2373	B2HMN8	>tr|B2HMN8|B2HMN8_MYCMM Histone-like protein Hns OS=Mycobacterium marinum (strain ATCC BAA-535 / M) GN=hns PE=4 SV=1	4	4	45.5	16.131	8.92131	7.76165	8.40348	6.70275	0.870012	0.923623	0.797617
MMAR_1371	665	B2HFI5	>sp|B2HFI5|Y1371_MYCMM UPF0182 protein MMAR_1371 OS=Mycobacterium marinum (strain ATCC BAA-535 / M) GN=MMAR_1371 PE=3 SV=1	41	41	39.8	108.17	110.673	113.09	122.489	134.642	1.02184	0.923267	1.09922
MMAR_4505	211	B2HDM7	>tr|B2HDM7|B2HDM7_MYCMM Glycosyltransferase OS=Mycobacterium marinum (strain ATCC BAA-535 / M) GN=MMAR_4505 PE=4 SV=1	15	15	27.9	71.899	10.9178	7.25671	7.86434	3.60666	0.664665	0.922735	0.458609
omt_2	3484	B2HSC8	>tr|B2HSC8|B2HSC8_MYCMM O-methyltransferase Omt_2 OS=Mycobacterium marinum (strain ATCC BAA-535 / M) GN=omt_2 PE=4 SV=1	10	10	33.1	30.709	5.96665	7.25671	7.86434	7.73479	1.21621	0.922735	0.983526
MMAR_0246	1873	B2HKL0	>tr|B2HKL0|B2HKL0_MYCMM Conserved hypothetical membrane protein OS=Mycobacterium marinum (strain ATCC BAA-535 / M) GN=MMAR_0246 PE=4 SV=1	10	10	30.1	30.761	11.4313	9.32335	10.1264	11.3633	0.815599	0.9207	1.12215
lpqB	477	B2HEQ2	>tr|B2HEQ2|B2HEQ2_MYCMM Lipoprotein LpqB OS=Mycobacterium marinum (strain ATCC BAA-535 / M) GN=lpqB PE=3 SV=1	22	22	34.8	62.091	36.7466	42.2256	45.8852	37.6637	1.1491	0.920244	0.820825
lpqG	1569	B2HJ64	>tr|B2HJ64|B2HJ64_MYCMM Conserved hypothetical lipoprotein LpqG OS=Mycobacterium marinum (strain ATCC BAA-535 / M) GN=lpqG PE=4 SV=1	13	13	58.1	25.868	32.263	31.5046	34.2585	27.3434	0.976495	0.919614	0.798149
MMAR_4041	3013	B2HQF6	>tr|B2HQF6|B2HQF6_MYCMM Conserved hypothetical membrane protein OS=Mycobacterium marinum (strain ATCC BAA-535 / M) GN=MMAR_4041 PE=4 SV=1	3	3	19.4	19.209	12.9029	13.9147	15.1368	23.3026	1.07842	0.919262	1.53947
mce1D	2403	B2HMU3	>tr|B2HMU3|B2HMU3_MYCMM MCE-family protein Mce1D OS=Mycobacterium marinum (strain ATCC BAA-535 / M) GN=mce1D PE=4 SV=1	30	30	40.7	57.216	78.3067	94.9954	103.356	73.2743	1.21312	0.919109	0.708951
sucB	975	B2HGY4	>tr|B2HGY4|B2HGY4_MYCMM Pyruvate dehydrogenase (E2 component) SucB OS=Mycobacterium marinum (strain ATCC BAA-535 / M) GN=sucB PE=3 SV=1	26	26	44.4	60.655	72.4547	76.3721	83.1148	75.8053	1.05407	0.918876	0.912056
MMAR_0542	2661	B2HNW4	>tr|B2HNW4|B2HNW4_MYCMM Conserved membrane protein OS=Mycobacterium marinum (strain ATCC BAA-535 / M) GN=MMAR_0542 PE=4 SV=1	21	21	39.4	55.617	74.4283	69.4328	75.6197	61.8674	0.932881	0.918184	0.818139
MMAR_5163	1779	B2HK72	>tr|B2HK72|B2HK72_MYCMM Conserved hypothetical membrane protein OS=Mycobacterium marinum (strain ATCC BAA-535 / M) GN=MMAR_5163 PE=4 SV=1	6	6	43.4	13.253	5.93225	2.57158	2.80116	2.58554	0.433492	0.918043	0.923025
MMAR_3856	2608	B2HNL4	>tr|B2HNL4|B2HNL4_MYCMM Short-chain type dehydrogenase/reductase OS=Mycobacterium marinum (strain ATCC BAA-535 / M) GN=MMAR_3856 PE=4 SV=1	19	19	59.7	27.946	49.0787	42.9181	46.7524	48.9069	0.874475	0.917986	1.04608
MMAR_2623	3583	B2HSP5	>tr|B2HSP5|B2HSP5_MYCMM Conserved short-chain dehydrogenase OS=Mycobacterium marinum (strain ATCC BAA-535 / M) GN=MMAR_2623 PE=3 SV=1	17	17	54	26.935	41.6634	41.286	44.9768	57.7502	0.990943	0.917941	1.284
MMAR_0427	2414	B2HMV5	>tr|B2HMV5|B2HMV5_MYCMM Lysophospholipase OS=Mycobacterium marinum (strain ATCC BAA-535 / M) GN=MMAR_0427 PE=4 SV=1	10	10	36.6	29.955	14.8994	18.1418	19.7664	27.3325	1.21762	0.91781	1.38278
MMAR_0953	3503	B2HSF2	>tr|B2HSF2|B2HSF2_MYCMM Conserved integral membrane protein OS=Mycobacterium marinum (strain ATCC BAA-535 / M) GN=MMAR_0953 PE=4 SV=1	12	12	14.3	84.349	9.93677	11.4134	12.4412	14.959	1.14861	0.917394	1.20238
gap	2741	B2HP84	>tr|B2HP84|B2HP84_MYCMM Glyceraldehyde 3-phosphate dehydrogenase Gap OS=Mycobacterium marinum (strain ATCC BAA-535 / M) GN=gap PE=3 SV=1	21	21	56.6	35.999	34.75	34.1231	37.218	41.7809	0.981959	0.916845	1.1226
MMAR_2346	2942	B2HQ52	>tr|B2HQ52|B2HQ52_MYCMM Conserved hypothetical dioxygenase OS=Mycobacterium marinum (strain ATCC BAA-535 / M) GN=MMAR_2346 PE=4 SV=1	10	10	32.1	40.045	7.96318	4.63823	5.06319	6.68092	0.58246	0.916069	1.31951
MMAR_1259	440	B2HEL0	>tr|B2HEL0|B2HEL0_MYCMM Conserved hypothetical membrane protein OS=Mycobacterium marinum (strain ATCC BAA-535 / M) GN=MMAR_1259 PE=4 SV=1	1	1	5.6	23.91	7.43825	4.63823	5.06319	6.20311	0.623565	0.916069	1.22514
MMAR_3995	2828	B2HPQ1	>tr|B2HPQ1|B2HPQ1_MYCMM Uncharacterized protein OS=Mycobacterium marinum (strain ATCC BAA-535 / M) GN=MMAR_3995 PE=4 SV=1	2	2	10.9	23.674	5.46465	4.63823	5.06319	4.12813	0.84877	0.916069	0.815323
rho	3063	B2HQL5	>tr|B2HQL5|B2HQL5_MYCMM Transcription termination factor Rho OS=Mycobacterium marinum (strain ATCC BAA-535 / M) GN=rho PE=3 SV=1	46	46	60.5	66.738	128.55	125.972	137.55	113.589	0.979943	0.915824	0.825802
MMAR_2712	3643	B2HSY1	>tr|B2HSY1|B2HSY1_MYCMM Conserved membrane protein OS=Mycobacterium marinum (strain ATCC BAA-535 / M) GN=MMAR_2712 PE=4 SV=1	20	20	27.3	76.087	55.0568	58.371	63.7704	55.7079	1.0602	0.915331	0.87357
MMAR_5079	1534	B2HJ20	>sp|B2HJ20|Y5079_MYCMM Uncharacterized tRNA/rRNA methyltransferase MMAR_5079 OS=Mycobacterium marinum (strain ATCC BAA-535 / M) GN=MMAR_5079 PE=3 SV=1	13	13	28.4	32.508	15.8576	9.71106	10.6127	13.4164	0.612393	0.915037	1.26418
MMAR_1643	1099	B2HHG1	>tr|B2HHG1|B2HHG1_MYCMM Transcriptional regulatory protein (Probably AsnC-family) OS=Mycobacterium marinum (strain ATCC BAA-535 / M) GN=MMAR_1643 PE=4 SV=1	12	12	38.9	27.916	16.8157	16.5097	18.0435	22.7375	0.981804	0.914997	1.26015
ctpB	1887	B2HKN2	>tr|B2HKN2|B2HKN2_MYCMM Cation-transporter p-type ATPase B CtpB OS=Mycobacterium marinum (strain ATCC BAA-535 / M) GN=ctpB PE=3 SV=1	16	16	21.3	78.297	18.881	18.0714	19.7664	20.6297	0.957122	0.914251	1.04368
MMAR_3250	967	B2HGX4	>tr|B2HGX4|B2HGX4_MYCMM Conserved transmembrane protein OS=Mycobacterium marinum (strain ATCC BAA-535 / M) GN=MMAR_3250 PE=4 SV=1	15	15	43.6	25.75	68.9408	72.0278	78.7901	71.1666	1.04478	0.914173	0.903243
rplD	3571	B2HSN2	>sp|B2HSN2|RL4_MYCMM 50S ribosomal protein L4 OS=Mycobacterium marinum (strain ATCC BAA-535 / M) GN=rplD PE=3 SV=1	19	19	50	23.832	62.9741	58.8291	64.3623	63.4646	0.934179	0.91403	0.986052
MMAR_5107	1560	B2HJ48	>tr|B2HJ48|B2HJ48_MYCMM Conserved transmembrane protein rich in alanine, arginine and proline OS=Mycobacterium marinum (strain ATCC BAA-535 / M) GN=MMAR_5107 PE=4 SV=1	22	22	44.2	48.688	33.2784	29.4849	32.2603	23.6931	0.886005	0.913968	0.734435
rpmF	375	B2HEB1	>sp|B2HEB1|RL32_MYCMM 50S ribosomal protein L32 OS=Mycobacterium marinum (strain ATCC BAA-535 / M) GN=rpmF PE=3 SV=1	6	6	50.9	6.5377	18.8237	19.5862	21.4365	31.5807	1.04051	0.913686	1.47322
MMAR_1345	503	B2HEU7	>tr|B2HEU7|B2HEU7_MYCMM Conserved alanine and valine rich protein OS=Mycobacterium marinum (strain ATCC BAA-535 / M) GN=MMAR_1345 PE=4 SV=1	23	23	53.2	42.397	30.757	25.7862	28.2226	30.4177	0.838385	0.913672	1.07778
mobA	2566	B2HNF8	>sp|B2HNF8|MOBA_MYCMM Probable molybdenum cofactor guanylyltransferase OS=Mycobacterium marinum (strain ATCC BAA-535 / M) GN=mobA PE=3 SV=1	13	13	49.8	20.986	22.3491	23.7664	26.0133	25.2684	1.06342	0.913625	0.971365
MMAR_2296	2791	B2HPE1	>tr|B2HPE1|B2HPE1_MYCMM Conserved membrane protein OS=Mycobacterium marinum (strain ATCC BAA-535 / M) GN=MMAR_2296 PE=4 SV=1	5	5	41.9	17.205	6.45718	5.16662	5.65507	5.17108	0.800135	0.913625	0.914415
rplT	3190	B2HR14	>sp|B2HR14|RL20_MYCMM 50S ribosomal protein L20 OS=Mycobacterium marinum (strain ATCC BAA-535 / M) GN=rplT PE=3 SV=1	10	10	42.6	14.472	15.3785	13.4801	14.7559	23.3354	0.876555	0.913537	1.58142
rpmE	3062	B2HQL4	>sp|B2HQL4|RL31_MYCMM 50S ribosomal protein L31 OS=Mycobacterium marinum (strain ATCC BAA-535 / M) GN=rpmE PE=3 SV=1	5	5	53.1	8.942	12.8914	11.8949	13.033	14.4703	0.922701	0.912676	1.11028
MMAR_1654	1108	B2HHH2	>tr|B2HHH2|B2HHH2_MYCMM Oxidoreductase OS=Mycobacterium marinum (strain ATCC BAA-535 / M) GN=MMAR_1654 PE=4 SV=1	6	6	39	16.4	5.46465	6.72832	7.37797	4.11721	1.23124	0.911948	0.558042
MMAR_3423	1477	B2HIU1	>tr|B2HIU1|B2HIU1_MYCMM Conserved hypothetical transcriptional regulatory protein OS=Mycobacterium marinum (strain ATCC BAA-535 / M) GN=MMAR_3423 PE=4 SV=1	12	12	47.2	22.287	8.44224	10.3098	11.3101	14.383	1.22121	0.911552	1.27169
oppC	3254	B2HRB3	>tr|B2HRB3|B2HRB3_MYCMM Oligopeptide-transport integral membrane protein ABC transporter OppC OS=Mycobacterium marinum (strain ATCC BAA-535 / M) GN=oppC PE=3 SV=1	3	3	6.7	32.166	5.95518	4.66168	5.11594	5.16016	0.782793	0.911206	1.00864
tatA	733	B2HFV1	>sp|B2HFV1|TATA_MYCMM Sec-independent protein translocase protein TatA OS=Mycobacterium marinum (strain ATCC BAA-535 / M) GN=tatA PE=3 SV=1	6	6	58	9.5198	28.2699	28.4516	31.2348	38.2835	1.00642	0.910894	1.22567
nuoN	831	B2HGD5	>tr|B2HGD5|B2HGD5_MYCMM NADH-quinone oxidoreductase subunit N OS=Mycobacterium marinum (strain ATCC BAA-535 / M) GN=nuoN PE=3 SV=1	6	6	18.9	55.178	17.8426	14.5134	15.9397	17.034	0.813413	0.91052	1.06865
MMAR_2025	2196	B2HM11	>tr|B2HM11|B2HM11_MYCMM SAM-dependent methyltransferase OS=Mycobacterium marinum (strain ATCC BAA-535 / M) GN=MMAR_2025 PE=4 SV=1	12	12	31.9	42.168	7.90585	6.17649	6.78608	7.72387	0.781256	0.91017	1.13819
MMAR_2219	2723	B2HP64	>tr|B2HP64|B2HP64_MYCMM Aminoglycosides/tetracycline-transport integral membrane protein OS=Mycobacterium marinum (strain ATCC BAA-535 / M) GN=MMAR_2219 PE=4 SV=1	4	4	9.1	54.321	15.3556	13.8678	15.2423	15.4914	0.903112	0.909822	1.01634
htrA	3436	B2HS44	>tr|B2HS44|B2HS44_MYCMM Serine protease HtrA (DegP protein) OS=Mycobacterium marinum (strain ATCC BAA-535 / M) GN=htrA PE=4 SV=1	47	47	71.2	52.025	151.481	166.729	183.289	169.742	1.10066	0.909654	0.926092
MMAR_3143	778	B2HG13	>tr|B2HG13|B2HG13_MYCMM Uncharacterized protein OS=Mycobacterium marinum (strain ATCC BAA-535 / M) GN=MMAR_3143 PE=4 SV=1	15	15	40.8	33.204	28.3043	17.0381	18.7409	8.71224	0.601961	0.909142	0.464879
secF	2499	B2HN73	>tr|B2HN73|B2HN73_MYCMM Protein-export membrane protein SecF OS=Mycobacterium marinum (strain ATCC BAA-535 / M) GN=secF PE=3 SV=1	20	20	37.7	47.676	76.8466	86.1535	94.7826	83.5401	1.12111	0.908959	0.881386
MMAR_0024	1307	B2HI69	>tr|B2HI69|B2HI69_MYCMM Plasmid maintenance system antidote protein OS=Mycobacterium marinum (strain ATCC BAA-535 / M) GN=MMAR_0024 PE=4 SV=1	9	9	31.8	39.718	8.43078	6.70488	7.37797	4.12813	0.795286	0.90877	0.559521
MMAR_5476	2632	B2HNS7	>tr|B2HNS7|B2HNS7_MYCMM Conserved hypothetical alanine rich membrane protein OS=Mycobacterium marinum (strain ATCC BAA-535 / M) GN=MMAR_5476 PE=4 SV=1	5	5	20.5	25.344	7.97464	6.70488	7.37797	7.70204	0.840775	0.90877	1.04392
MMAR_2526	3385	B2HRU7	>tr|B2HRU7|B2HRU7_MYCMM Pseudouridine synthase OS=Mycobacterium marinum (strain ATCC BAA-535 / M) GN=MMAR_2526 PE=3 SV=1	16	16	49	27.669	15.3441	13.5035	14.8614	15.991	0.880048	0.908629	1.07601
MMAR_3703	2265	B2HM99	>tr|B2HM99|B2HM99_MYCMM Conserved hypothetical transcriptional regulator OS=Mycobacterium marinum (strain ATCC BAA-535 / M) GN=MMAR_3703 PE=4 SV=1	9	9	30.6	35.581	6.44572	3.02963	3.34029	2.57462	0.470022	0.906996	0.770779
MMAR_5077	1532	B2HJ18	>tr|B2HJ18|B2HJ18_MYCMM Conserved hypothetical Zn-dependent hydrolase OS=Mycobacterium marinum (strain ATCC BAA-535 / M) GN=MMAR_5077 PE=4 SV=1	7	7	32.4	33.198	10.4158	4.59134	5.06319	6.18128	0.440803	0.906808	1.22083
zntA	699	B2HFP4	>tr|B2HFP4|B2HFP4_MYCMM Cation transport ATPase, ZntA OS=Mycobacterium marinum (strain ATCC BAA-535 / M) GN=zntA PE=3 SV=1	47	32	44.5	83.939	127.431	110.566	122.021	65.0399	0.867649	0.90612	0.533023
MMAR_2572	3402	B2HRY8	>tr|B2HRY8|B2HRY8_MYCMM Conserved secreted protein OS=Mycobacterium marinum (strain ATCC BAA-535 / M) GN=MMAR_2572 PE=4 SV=1	8	8	23.8	40.222	15.3785	18.0011	19.8719	16.002	1.17054	0.905858	0.805257
fadA2	2465	B2HN29	>tr|B2HN29|B2HN29_MYCMM Acetyl-CoA acyltransferase FadA2 OS=Mycobacterium marinum (strain ATCC BAA-535 / M) GN=fadA2 PE=3 SV=1	19	19	41.3	46.451	98.7969	81.5622	90.0475	91.3949	0.825554	0.905768	1.01496
MMAR_1971	1955	B2HL00	>tr|B2HL00|B2HL00_MYCMM Conserved 35 kDa alanine rich protein OS=Mycobacterium marinum (strain ATCC BAA-535 / M) GN=MMAR_1971 PE=4 SV=1	30	30	87.5	29.251	155.724	168.549	186.289	150.221	1.08236	0.90477	0.806385
MMAR_3599	1979	B2HL37	>tr|B2HL37|B2HL37_MYCMM Chromosome partition ATPase protein OS=Mycobacterium marinum (strain ATCC BAA-535 / M) GN=MMAR_3599 PE=4 SV=1	55	55	39.1	109.99	44.7097	48.0378	53.1165	66.0828	1.07444	0.904386	1.24411
embR_1	1745	B2HK20	>tr|B2HK20|B2HK20_MYCMM Transcriptional regulatory protein EmbR_1 OS=Mycobacterium marinum (strain ATCC BAA-535 / M) GN=embR_1 PE=4 SV=1	11	10	30.1	41.05	5.96665	5.64811	6.24695	2.56371	0.946613	0.904138	0.410393
hrcA	2250	B2HM80	>sp|B2HM80|HRCA_MYCMM Heat-inducible transcription repressor HrcA OS=Mycobacterium marinum (strain ATCC BAA-535 / M) GN=hrcA PE=3 SV=1	15	15	46.1	36.629	12.8914	7.59752	8.40348	10.3094	0.589346	0.904093	1.2268
senX3	3141	B2HQV5	>tr|B2HQV5|B2HQV5_MYCMM Two-component sensor histidine kinase SenX3 OS=Mycobacterium marinum (strain ATCC BAA-535 / M) GN=senX3 PE=4 SV=1	16	16	34.8	44.12	12.4124	13.3394	14.7559	15.4477	1.07469	0.904003	1.04688
sdhA_1	2469	B2HN36	>tr|B2HN36|B2HN36_MYCMM Succinate dehydrogenase (Iron-sulfur subunit), SdhA_1 OS=Mycobacterium marinum (strain ATCC BAA-535 / M) GN=sdhA_1 PE=4 SV=1	45	45	59	70.473	163.415	157.5	174.229	153.751	0.963804	0.903981	0.882466
MMAR_0048	1323	B2HI93	>tr|B2HI93|B2HI93_MYCMM Uncharacterized protein OS=Mycobacterium marinum (strain ATCC BAA-535 / M) GN=MMAR_0048 PE=4 SV=1	6	6	23.4	39.656	6.45718	4.13329	4.57681	6.72459	0.640108	0.903095	1.46927
ftsH	1565	B2HJ54	>tr|B2HJ54|B2HJ54_MYCMM ATP-dependent zinc metalloprotease FtsH OS=Mycobacterium marinum (strain ATCC BAA-535 / M) GN=ftsH PE=3 SV=1	49	49	62.5	80.498	151.367	166.388	184.261	148.744	1.09924	0.903002	0.807243
MMAR_3287	1140	B2HHL5	>tr|B2HHL5|B2HHL5_MYCMM Conserved transmembrane protein OS=Mycobacterium marinum (strain ATCC BAA-535 / M) GN=MMAR_3287 PE=4 SV=1	18	18	52.8	26.846	36.7466	39.8181	44.1096	36.0993	1.08359	0.902709	0.818401
MMAR_5164	1780	B2HK73	>tr|B2HK73|B2HK73_MYCMM Conserved regulatory protein OS=Mycobacterium marinum (strain ATCC BAA-535 / M) GN=MMAR_5164 PE=4 SV=1	19	19	74.1	24.719	32.7535	33.5947	37.218	47.9622	1.02568	0.902648	1.28869
pks5	2936	B2HQ46	>tr|B2HQ46|B2HQ46_MYCMM Probable polyketide synthase Pks5 OS=Mycobacterium marinum (strain ATCC BAA-535 / M) GN=pks5 PE=4 SV=1	58	30	32	222.58	137.437	117.294	129.973	76.9137	0.853439	0.90245	0.591768
MMAR_2009	2181	B2HLZ5	>tr|B2HLZ5|B2HLZ5_MYCMM Uncharacterized protein OS=Mycobacterium marinum (strain ATCC BAA-535 / M) GN=MMAR_2009 PE=4 SV=1	3	3	33.3	15.508	0	2.57158	2.85391	9.33196	#DIV/0!	0.901073	3.26988
ssb	1345	B2HIB8	>tr|B2HIB8|B2HIB8_MYCMM Single-stranded DNA-binding protein OS=Mycobacterium marinum (strain ATCC BAA-535 / M) GN=ssb PE=4 SV=1	6	6	44.6	17.887	5.97811	8.19625	9.10087	9.33196	1.37104	0.9006	1.02539
MMAR_2627	3587	B2HSP9	>tr|B2HSP9|B2HSP9_MYCMM Oxidoreductase OS=Mycobacterium marinum (strain ATCC BAA-535 / M) GN=MMAR_2627 PE=4 SV=1	23	23	38.4	44.607	42.1768	42.6602	47.5142	50.5041	1.01146	0.897841	1.06293
MMAR_4178	3283	B2HRF4	>tr|B2HRF4|B2HRF4_MYCMM Uncharacterized protein OS=Mycobacterium marinum (strain ATCC BAA-535 / M) GN=MMAR_4178 PE=4 SV=1	16	16	82	17.021	22.3835	31.2342	34.8388	21.6727	1.39541	0.896533	0.622084
MMAR_4610	423	B2HEI8	>tr|B2HEI8|B2HEI8_MYCMM Conserved hypothetical membrane protein OS=Mycobacterium marinum (strain ATCC BAA-535 / M) GN=MMAR_4610 PE=4 SV=1	4	4	27.4	27.748	6.46865	7.18637	8.02261	6.71367	1.11095	0.895765	0.836844
MMAR_0254	1878	B2HKL7	>tr|B2HKL7|B2HKL7_MYCMM Ketoacyl reductase OS=Mycobacterium marinum (strain ATCC BAA-535 / M) GN=MMAR_0254 PE=3 SV=1	12	12	51.3	27.624	22.8282	20.5961	23.0012	23.2153	0.902223	0.895439	1.00931
MMAR_2354	2948	B2HQ60	>tr|B2HQ60|B2HQ60_MYCMM Uncharacterized protein OS=Mycobacterium marinum (strain ATCC BAA-535 / M) GN=MMAR_2354 PE=4 SV=1	22	22	34.1	50.045	36.758	30.4713	34.0359	11.8738	0.82897	0.895269	0.348862
MMAR_0617	2702	B2HP37	>tr|B2HP37|B2HP37_MYCMM Conserved protein OS=Mycobacterium marinum (strain ATCC BAA-535 / M) GN=MMAR_0617 PE=4 SV=1	12	12	18.6	61.657	22.8282	22.7097	25.3687	27.8758	0.994807	0.895185	1.09883
MMAR_2696	3628	B2HSW5	>tr|B2HSW5|B2HSW5_MYCMM Drug-transport transmembrane ATP-binding protein ABC transporter OS=Mycobacterium marinum (strain ATCC BAA-535 / M) GN=MMAR_2696 PE=3 SV=1	38	38	44	71.273	78.9692	90.4041	101.041	101.726	1.1448	0.894725	1.00678
hupB	1396	B2HII3	>tr|B2HII3|B2HII3_MYCMM DNA-binding protein Hu, HupB OS=Mycobacterium marinum (strain ATCC BAA-535 / M) GN=hupB PE=3 SV=1	19	19	40	22.762	155.908	218.794	244.756	174.749	1.40336	0.893928	0.713974
MMAR_4221	3442	B2HS51	>tr|B2HS51|B2HS51_MYCMM Tetronasin-transport integral membrane protein ABC transporter OS=Mycobacterium marinum (strain ATCC BAA-535 / M) GN=MMAR_4221 PE=4 SV=1	9	9	15	56.751	12.3894	18.5764	20.7919	21.6509	1.49937	0.893444	1.04131
fadE36	2069	B2HLH6	>tr|B2HLH6|B2HLH6_MYCMM Acyl-CoA dehydrogenase FadE36 OS=Mycobacterium marinum (strain ATCC BAA-535 / M) GN=fadE36 PE=4 SV=1	16	16	46.6	38.326	12.4009	8.65429	9.69275	12.3844	0.697876	0.892862	1.2777
fecB	1105	B2HHG8	>tr|B2HHG8|B2HHG8_MYCMM FEIII-dicitrate-binding periplasmic lipoprotein FecB OS=Mycobacterium marinum (strain ATCC BAA-535 / M) GN=fecB PE=4 SV=1	16	16	57.1	37.713	24.2769	21.0776	23.6458	23.7804	0.868218	0.89139	1.00569
MMAR_5157	1773	B2HK66	>tr|B2HK66|B2HK66_MYCMM Conserved membrane protein OS=Mycobacterium marinum (strain ATCC BAA-535 / M) GN=MMAR_5157 PE=4 SV=1	7	7	36.6	18.904	33.7002	38.3267	43.0313	40.2165	1.13729	0.890671	0.934588
sucD	390	B2HED0	>tr|B2HED0|B2HED0_MYCMM Succinyl-CoA ligase [ADP-forming] subunit alpha OS=Mycobacterium marinum (strain ATCC BAA-535 / M) GN=sucD PE=3 SV=1	22	22	53.7	30.813	34.75	27.1369	30.4846	25.2466	0.780916	0.890182	0.828175
mscL	370	B2HEA6	>sp|B2HEA6|MSCL_MYCMM Large-conductance mechanosensitive channel OS=Mycobacterium marinum (strain ATCC BAA-535 / M) GN=mscL PE=3 SV=1	7	7	55	16.134	26.2849	29.5318	33.1803	36.719	1.12353	0.89004	1.10665
MMAR_0543	2662	B2HNW5	>tr|B2HNW5|B2HNW5_MYCMM Conserved membrane protein OS=Mycobacterium marinum (strain ATCC BAA-535 / M) GN=MMAR_0543 PE=4 SV=1	75	75	44	146.04	191.524	187.854	211.218	207.406	0.980837	0.889384	0.981952
fadD6	3451	B2HS62	>tr|B2HS62|B2HS62_MYCMM Fatty-acid-CoA ligase FadD6 OS=Mycobacterium marinum (strain ATCC BAA-535 / M) GN=fadD6 PE=4 SV=1	36	36	58.9	63.752	112.19	110.977	124.792	115.533	0.989182	0.889291	0.925802
cfp29	1019	B2HH42	>tr|B2HH42|B2HH42_MYCMM 29 kDa antigen Cfp29 OS=Mycobacterium marinum (strain ATCC BAA-535 / M) GN=cfp29 PE=4 SV=1	18	18	45.9	29.04	56.0149	43.3292	48.7391	46.4087	0.77353	0.889003	0.952186
lprG	2724	B2HP65	>tr|B2HP65|B2HP65_MYCMM Conserved lipoprotein LprG OS=Mycobacterium marinum (strain ATCC BAA-535 / M) GN=lprG PE=4 SV=1	16	16	59.7	24.271	75.9229	89.8522	101.082	75.7834	1.18347	0.888902	0.74972
moeA1	367	B2HEA1	>tr|B2HEA1|B2HEA1_MYCMM Molybdopterin biosynthesis protein MoeA1 OS=Mycobacterium marinum (strain ATCC BAA-535 / M) GN=moeA1 PE=4 SV=1	17	17	45	44.696	38.2526	34.0293	38.2962	42.3461	0.889596	0.888582	1.10575
MMAR_1676	1352	B2HID2	>tr|B2HID2|B2HID2_MYCMM Uncharacterized protein OS=Mycobacterium marinum (strain ATCC BAA-535 / M) GN=MMAR_1676 PE=4 SV=1	8	8	76.3	14.893	9.93677	14.5369	16.3733	23.1389	1.46294	0.887838	1.4132
MMAR_2750	101	B2HD55	>tr|B2HD55|B2HD55_MYCMM Conserved protein OS=Mycobacterium marinum (strain ATCC BAA-535 / M) GN=MMAR_2750 PE=4 SV=1	6	6	51.2	14.557	10.4273	14.0554	15.8342	18.5657	1.34794	0.887659	1.1725
MMAR_3055	714	B2HFS8	>tr|B2HFS8|B2HFS8_MYCMM Short chain dehydrogenase OS=Mycobacterium marinum (strain ATCC BAA-535 / M) GN=MMAR_3055 PE=4 SV=1	12	12	47	25.97	14.386	16.0517	18.0962	20.0973	1.11579	0.887018	1.11058
MMAR_4675	622	B2HFB7	>tr|B2HFB7|B2HFB7_MYCMM Membrane-associated oxidoreductase OS=Mycobacterium marinum (strain ATCC BAA-535 / M) GN=MMAR_4675 PE=4 SV=1	17	17	40.4	43.911	14.386	12.9283	14.5977	14.4812	0.898672	0.885638	0.992021
MMAR_4783	801	B2HG75	>tr|B2HG75|B2HG75_MYCMM Two-component sensor kinase OS=Mycobacterium marinum (strain ATCC BAA-535 / M) GN=MMAR_4783 PE=4 SV=1	18	18	43.9	55.163	53.5508	59.4747	67.2162	52.6555	1.11062	0.884827	0.783375
rphA	3014	B2HQF7	>tr|B2HQF7|B2HQF7_MYCMM Ribonuclease PH OS=Mycobacterium marinum (strain ATCC BAA-535 / M) GN=rphA PE=3 SV=1	5	5	14.1	28.831	6.43425	2.57158	2.90667	2.57462	0.399671	0.88472	0.885765
proB	2313	B2HMG0	>sp|B2HMG0|PROB_MYCMM Glutamate 5-kinase OS=Mycobacterium marinum (strain ATCC BAA-535 / M) GN=proB PE=3 SV=1	10	10	39.7	37.88	10.4388	5.09628	5.76058	10.2985	0.488207	0.884681	1.78775
speE	2484	B2HN56	>tr|B2HN56|B2HN56_MYCMM Spermidine synthase OS=Mycobacterium marinum (strain ATCC BAA-535 / M) GN=speE PE=3 SV=1	11	11	22.1	55.301	8.93278	11.39	12.8748	11.3305	1.27508	0.884676	0.880056
putA	3463	B2HS82	>tr|B2HS82|B2HS82_MYCMM Proline dehydrogenase, PutA OS=Mycobacterium marinum (strain ATCC BAA-535 / M) GN=putA PE=4 SV=1	10	10	31.3	35.557	9.37745	2.52469	2.85391	4.13905	0.26923	0.884642	1.45031
prrB	592	B2HF75	>tr|B2HF75|B2HF75_MYCMM Two-component sensor histidine kinase PrrB OS=Mycobacterium marinum (strain ATCC BAA-535 / M) GN=prrB PE=4 SV=1	32	32	69.9	48.403	77.7933	78.4153	88.6411	78.956	1.008	0.884638	0.890737
MMAR_4485	198	B2HDK7	>tr|B2HDK7|B2HDK7_MYCMM Conserved hypothetical secreted protein OS=Mycobacterium marinum (strain ATCC BAA-535 / M) GN=MMAR_4485 PE=4 SV=1	21	21	39.9	61.692	53.1291	43.8342	49.5536	48.9506	0.825051	0.884581	0.987831
MMAR_4397	3715	B2HT83	>tr|B2HT83|B2HT83_MYCMM Conserved hypothetical transmembrane protein OS=Mycobacterium marinum (strain ATCC BAA-535 / M) GN=MMAR_4397 PE=4 SV=1	13	13	31.3	63.821	32.2859	37.1996	42.0585	39.2391	1.15219	0.884473	0.932963
MMAR_0872	3329	B2HRL7	>tr|B2HRL7|B2HRL7_MYCMM Thioredoxin protein (Thiol-disulfide interchange protein) OS=Mycobacterium marinum (strain ATCC BAA-535 / M) GN=MMAR_0872 PE=4 SV=1	14	14	71.4	21.808	21.8013	25.9503	29.3536	22.6829	1.19031	0.884058	0.772746
MMAR_4703	640	B2HFE5	>tr|B2HFE5|B2HFE5_MYCMM Conserved hypothetical membrane protein OS=Mycobacterium marinum (strain ATCC BAA-535 / M) GN=MMAR_4703 PE=4 SV=1	6	6	31.8	19.329	8.92131	10.3801	11.7438	11.8738	1.16352	0.883884	1.01108
MMAR_3746	2299	B2HME2	>tr|B2HME2|B2HME2_MYCMM Uncharacterized protein OS=Mycobacterium marinum (strain ATCC BAA-535 / M) GN=MMAR_3746 PE=4 SV=1	9	9	33.1	27.534	12.9029	12.3764	14.0058	13.9161	0.959198	0.883665	0.993594
MMAR_3077	730	B2HFU8	>tr|B2HFU8|B2HFU8_MYCMM Conserved membrane protein OS=Mycobacterium marinum (strain ATCC BAA-535 / M) GN=MMAR_3077 PE=4 SV=1	15	15	33.1	26.834	88.3926	93.7854	106.145	86.789	1.06101	0.883555	0.817642
MMAR_0250	1875	B2HKL4	>tr|B2HKL4|B2HKL4_MYCMM Uncharacterized protein OS=Mycobacterium marinum (strain ATCC BAA-535 / M) GN=MMAR_0250 PE=4 SV=1	7	7	21.9	30.916	5.93225	2.0432	2.31478	3.60666	0.344422	0.882675	1.5581
sdhD	262	B2HDU4	>tr|B2HDU4|B2HDU4_MYCMM Succinate dehydrogenase (Hydrophobic membrane anchor subunit) SdhD OS=Mycobacterium marinum (strain ATCC BAA-535 / M) GN=sdhD PE=4 SV=1	9	9	38.1	17.895	34.7156	36.2601	41.0974	37.2405	1.04449	0.882297	0.906153
MMAR_0952	3502	B2HSF1	>tr|B2HSF1|B2HSF1_MYCMM Alpha-1,2-mannosidase OS=Mycobacterium marinum (strain ATCC BAA-535 / M) GN=MMAR_0952 PE=4 SV=1	15	15	19	93.626	11.9104	15.5467	17.6214	12.3844	1.30531	0.882263	0.702802
MMAR_3264	1125	B2HHJ3	>tr|B2HHJ3|B2HHJ3_MYCMM Conserved transmembrane transport protein-MmpL family OS=Mycobacterium marinum (strain ATCC BAA-535 / M) GN=MMAR_3264 PE=4 SV=1	12	2	15	104.6	14.888	10.3098	11.691	4.66052	0.692491	0.881856	0.398641
MMAR_0765	3097	B2HQQ5	>tr|B2HQQ5|B2HQQ5_MYCMM Conserved membrane protein OS=Mycobacterium marinum (strain ATCC BAA-535 / M) GN=MMAR_0765 PE=4 SV=1	8	8	36.2	23.962	11.9104	17.6134	19.9774	17.5446	1.47883	0.881666	0.878221
ftsE	880	B2HGJ5	>tr|B2HGJ5|B2HGJ5_MYCMM Cell division ATP-binding protein FtsE OS=Mycobacterium marinum (strain ATCC BAA-535 / M) GN=ftsE PE=3 SV=1	21	20	64.6	25.509	63.4876	66.5438	75.5142	71.699	1.04814	0.88121	0.949477
pykA	3165	B2HQY4	>tr|B2HQY4|B2HQY4_MYCMM Pyruvate kinase OS=Mycobacterium marinum (strain ATCC BAA-535 / M) GN=pykA PE=3 SV=1	16	16	31.8	50.824	14.8765	10.8616	12.3356	11.8738	0.730119	0.880506	0.962563
mmsA	34	B2HCW3	>tr|B2HCW3|B2HCW3_MYCMM Methylmalonate semialdehyde dehydrogenase, MmsA OS=Mycobacterium marinum (strain ATCC BAA-535 / M) GN=mmsA PE=3 SV=1	18	18	36.8	54.272	15.8805	12.3999	14.1113	10.3094	0.780825	0.87872	0.730578
glnA2	1146	B2HHM2	>tr|B2HHM2|B2HHM2_MYCMM Glutamine synthetase GlnA2 OS=Mycobacterium marinum (strain ATCC BAA-535 / M) GN=glnA2 PE=3 SV=1	12	12	33.2	49.744	9.40038	10.8382	12.3356	8.76682	1.15295	0.878606	0.71069
MMAR_4379	3698	B2HT65	>tr|B2HT65|B2HT65_MYCMM Conserved hypothetical transmembrane protein OS=Mycobacterium marinum (strain ATCC BAA-535 / M) GN=MMAR_4379 PE=4 SV=1	8	8	20.2	48.094	5.94372	9.32335	10.6127	9.82068	1.56861	0.878505	0.925367
nuoF	839	B2HGE3	>tr|B2HGE3|B2HGE3_MYCMM NADH dehydrogenase I (Chain F) NuoF (NADH-ubiquinone oxidoreductase chain F) OS=Mycobacterium marinum (strain ATCC BAA-535 / M) GN=nuoF PE=4 SV=1	20	20	47.3	48.175	30.8143	34.9454	39.8081	34.6004	1.13406	0.877847	0.869179
MMAR_0502	2463	B2HN27	>tr|B2HN27|B2HN27_MYCMM Conserved membrane protein OS=Mycobacterium marinum (strain ATCC BAA-535 / M) GN=MMAR_0502 PE=4 SV=1	12	12	42	30.588	26.7639	22.78	26.0133	29.3966	0.851146	0.875705	1.13006
MMAR_3626	1995	B2HL65;B2HER0	>tr|B2HL65|B2HL65_MYCMM Transmembrane ATP-binding protein ABC transorter OS=Mycobacterium marinum (strain ATCC BAA-535 / M) GN=MMAR_3626 PE=3 SV=1	32	32	48.1	72.176	28.247	37.2465	42.5565	55.7407	1.3186	0.875225	1.3098
MMAR_4386	3704	B2HT72	>tr|B2HT72|B2HT72_MYCMM Conserved membrane protein OS=Mycobacterium marinum (strain ATCC BAA-535 / M) GN=MMAR_4386 PE=4 SV=1	7	7	61.8	15.498	8.95571	11.39	13.033	12.9168	1.27181	0.873933	0.99108
MMAR_0476	2449	B2HN02	>tr|B2HN02|B2HN02_MYCMM Conserved membrane protein OS=Mycobacterium marinum (strain ATCC BAA-535 / M) GN=MMAR_0476 PE=4 SV=1	33	33	67.6	46.209	104.113	143.15	163.997	138.336	1.37496	0.872884	0.843528
MMAR_5352	2332	B2HMI7	>tr|B2HMI7|B2HMI7_MYCMM Oxidoreductase OS=Mycobacterium marinum (strain ATCC BAA-535 / M) GN=MMAR_5352 PE=4 SV=1	20	20	39.1	50.151	50.0827	43.9514	50.4093	41.2813	0.877577	0.871891	0.818923
MMAR_2940	514	B2HEW1	>tr|B2HEW1|B2HEW1_MYCMM Uncharacterized protein OS=Mycobacterium marinum (strain ATCC BAA-535 / M) GN=MMAR_2940 PE=4 SV=1	14	14	35.7	43.341	10.9637	12.3295	14.1641	17.0449	1.12458	0.870481	1.20339
omt_1	1882	B2HKM5	>tr|B2HKM5|B2HKM5_MYCMM O-methyltransferase Omt_1 OS=Mycobacterium marinum (strain ATCC BAA-535 / M) GN=omt_1 PE=4 SV=1	12	12	38.7	30.565	12.4009	11.39	13.0858	14.9263	0.918482	0.87041	1.14065
rplJ	3535	B2HSI8	>tr|B2HSI8|B2HSI8_MYCMM 50S ribosomal protein L10 OS=Mycobacterium marinum (strain ATCC BAA-535 / M) GN=rplJ PE=3 SV=1	20	20	79.1	21.079	60.9432	50.081	57.5762	46.3869	0.821765	0.869821	0.805661
lldD2	103	B2HD57	>tr|B2HD57|B2HD57_MYCMM L-lactate dehydrogenase (Cytochrome) LldD2 OS=Mycobacterium marinum (strain ATCC BAA-535 / M) GN=lldD2 PE=4 SV=1	19	19	39.6	45.571	21.8013	20.1381	23.1594	20.0973	0.923711	0.869542	0.867783
MMAR_0647	2843	B2HPT1	>tr|B2HPT1|B2HPT1_MYCMM Conserved secreted protein OS=Mycobacterium marinum (strain ATCC BAA-535 / M) GN=MMAR_0647 PE=4 SV=1	23	23	53.5	32.235	111.746	101.266	116.483	99.5639	0.906215	0.869361	0.854751
MMAR_4539	382	B2HEC0	>tr|B2HEC0|B2HEC0_MYCMM Uncharacterized protein OS=Mycobacterium marinum (strain ATCC BAA-535 / M) GN=MMAR_4539 PE=4 SV=1	7	7	35	21.979	10.9064	13.4801	15.5061	10.2876	1.23598	0.869342	0.663454
MMAR_1384	673	B2HFJ8	>tr|B2HFJ8|B2HFJ8_MYCMM Uncharacterized protein OS=Mycobacterium marinum (strain ATCC BAA-535 / M) GN=MMAR_1384 PE=4 SV=1	8	8	23.8	27.061	10.9178	15.4998	17.8325	17.5118	1.41968	0.869193	0.982019
kgd	3296	B2HRH1	>tr|B2HRH1|B2HRH1_MYCMM Alpha-ketoglutarate decarboxylase Kgd OS=Mycobacterium marinum (strain ATCC BAA-535 / M) GN=kgd PE=4 SV=1	63	63	43.6	138.03	90.6388	76.4425	88.0197	96.5333	0.843374	0.86847	1.09672
ceoC1	3411	B2HS00	>tr|B2HS00|B2HS00_MYCMM TRK system potassium uptake protein CeoC1 OS=Mycobacterium marinum (strain ATCC BAA-535 / M) GN=ceoC1 PE=4 SV=1	7	7	20.8	25.494	9.43477	9.22957	10.6655	7.73479	0.97825	0.865366	0.725215
MMAR_4752	786	B2HG44	>tr|B2HG44|B2HG44_MYCMM Transcriptional regulatory protein OS=Mycobacterium marinum (strain ATCC BAA-535 / M) GN=MMAR_4752 PE=4 SV=1	7	7	35	24.09	12.4124	7.7382	8.94261	9.82068	0.623427	0.865318	1.09819
sigK	3098	B2HQQ6	>tr|B2HQQ6|B2HQQ6_MYCMM Alternative RNA polymerase sigma factor SigK OS=Mycobacterium marinum (strain ATCC BAA-535 / M) GN=sigK PE=4 SV=1	11	11	45.5	20.832	6.93625	7.7382	8.94261	10.3094	1.11562	0.865318	1.15284
MMAR_4497	206	B2HDL9	>tr|B2HDL9|B2HDL9_MYCMM Methyltransferase OS=Mycobacterium marinum (strain ATCC BAA-535 / M) GN=MMAR_4497 PE=4 SV=1	7	7	33.9	26.738	7.96318	8.24314	9.53449	9.27738	1.03516	0.86456	0.973034
ppm1A	569	B2HF48	>tr|B2HF48|B2HF48_MYCMM Apolipoprotein N-acyltransferase OS=Mycobacterium marinum (strain ATCC BAA-535 / M) GN=ppm1A PE=3 SV=1	20	20	27.8	74.989	27.8023	34.17	39.5327	39.1845	1.22903	0.864347	0.991191
MMAR_2536	3390	B2HRV5	>tr|B2HRV5|B2HRV5_MYCMM Metal cation transporter p-type ATPase OS=Mycobacterium marinum (strain ATCC BAA-535 / M) GN=MMAR_2536 PE=3 SV=1	50	36	46.1	79.294	291.873	269.439	311.733	178.618	0.92314	0.864328	0.572985
cyp135B4	3379	B2HRT3	>tr|B2HRT3|B2HRT3_MYCMM Cytochrome P450 135B4 Cyp135B4 OS=Mycobacterium marinum (strain ATCC BAA-535 / M) GN=cyp135B4 PE=3 SV=1	34	34	54.2	50.662	63.5334	61.4007	71.0429	40.2056	0.966431	0.864276	0.565934
MMAR_2335	2931	B2HQ41	>tr|B2HQ41|B2HQ41_MYCMM Predicted pyridoxal phosphate-dependent enzyme OS=Mycobacterium marinum (strain ATCC BAA-535 / M) GN=MMAR_2335 PE=3 SV=1	12	12	30.6	49.202	13.4164	8.79497	10.1791	2.07498	0.655541	0.86402	0.203847
atpD	3051	B2HQK2	>sp|B2HQK2|ATPB_MYCMM ATP synthase subunit beta OS=Mycobacterium marinum (strain ATCC BAA-535 / M) GN=atpD PE=3 SV=1	43	43	86.7	52.686	395.13	418.682	485.136	385.743	1.0596	0.86302	0.795123
MMAR_0144	1611	B2HJE5	>tr|B2HJE5|B2HJE5_MYCMM Conserved hypothetical membrane protein OS=Mycobacterium marinum (strain ATCC BAA-535 / M) GN=MMAR_0144 PE=4 SV=1	7	7	39.1	16.118	7.43825	8.31348	9.64	5.16016	1.11767	0.862394	0.535287
nuoE	840	B2HGE4	>tr|B2HGE4|B2HGE4_MYCMM NADH dehydrogenase I (Chain E) NuoE (NADH-ubiquinone oxidoreductase chain E) OS=Mycobacterium marinum (strain ATCC BAA-535 / M) GN=nuoE PE=3 SV=1	10	10	47.8	26.546	21.3222	26.8898	31.182	24.7688	1.26112	0.862351	0.794329
MMAR_4964	1220	B2HHW8	>tr|B2HHW8|B2HHW8_MYCMM Conserved hypothetical membrane protein OS=Mycobacterium marinum (strain ATCC BAA-535 / M) GN=MMAR_4964 PE=4 SV=1	7	7	14.2	26.695	7.95171	8.26659	9.58724	9.78794	1.0396	0.862248	1.02093
pknF_3	3420	B2HS22	>tr|B2HS22|B2HS22_MYCMM Anchored-membrane serine/threonine-protein kinase PknF_3 OS=Mycobacterium marinum (strain ATCC BAA-535 / M) GN=pknF_3 PE=4 SV=1	13	13	28.6	50.302	34.2251	33.0194	38.2962	41.2595	0.964773	0.862212	1.07738
fum	3689	B2HT54	>tr|B2HT54|B2HT54_MYCMM Fumarate hydratase class II OS=Mycobacterium marinum (strain ATCC BAA-535 / M) GN=fum PE=1 SV=1	19	19	35.1	50.191	17.877	12.9986	15.0841	13.9161	0.727112	0.861745	0.922568
MMAR_2440	3182	B2HR04	>tr|B2HR04|B2HR04_MYCMM Iron-regulated conserved protein OS=Mycobacterium marinum (strain ATCC BAA-535 / M) GN=MMAR_2440 PE=4 SV=1	14	14	67.1	15.191	14.3745	21.7701	25.2632	32.0148	1.5145	0.861733	1.26725
sodC	3081	B2HQN7	>tr|B2HQN7|B2HQN7_MYCMM Superoxide dismutase [Cu-Zn] OS=Mycobacterium marinum (strain ATCC BAA-535 / M) GN=sodC PE=3 SV=1	16	16	61.8	23.643	73.4702	77.2179	89.6139	79.8461	1.05101	0.861673	0.891001
ansP1	815	B2HGA7	>tr|B2HGA7|B2HGA7_MYCMM L-asparagine permease AnsP1 OS=Mycobacterium marinum (strain ATCC BAA-535 / M) GN=ansP1 PE=4 SV=1	8	8	13.8	52.962	36.2102	27.2307	31.6156	36.6317	0.752017	0.861303	1.15866
lpqT	185	B2HDJ3	>tr|B2HDJ3|B2HDJ3_MYCMM Conserved lipoprotein LpqT OS=Mycobacterium marinum (strain ATCC BAA-535 / M) GN=lpqT PE=4 SV=1	9	9	40.4	23.16	16.371	14.0085	16.2678	11.8411	0.855687	0.861116	0.727884
rpsK	43	B2HCX2	>sp|B2HCX2|RS11_MYCMM 30S ribosomal protein S11 OS=Mycobacterium marinum (strain ATCC BAA-535 / M) GN=rpsK PE=3 SV=1	11	11	37.7	14.686	38.2526	48.0378	55.8006	104.15	1.25581	0.860884	1.86648
MMAR_1269	449	B2HEM0	>tr|B2HEM0|B2HEM0_MYCMM Acyl esterase OS=Mycobacterium marinum (strain ATCC BAA-535 / M) GN=MMAR_1269 PE=4 SV=1	16	16	34.2	63.168	19.8277	24.2948	28.2226	17.0231	1.2253	0.860828	0.603172
mmpL5_2	3103	B2HQR1	>tr|B2HQR1|B2HQR1_MYCMM Conserved transmembrane transport protein MmpL5_2 OS=Mycobacterium marinum (strain ATCC BAA-535 / M) GN=mmpL5_2 PE=4 SV=1	36	31	39.3	105.76	40.6823	45.9946	53.433	45.9309	1.13058	0.86079	0.859598
MMAR_1952	1939	B2HKY1	>tr|B2HKY1|B2HKY1_MYCMM Short-chain type dehydrogenase/reductase OS=Mycobacterium marinum (strain ATCC BAA-535 / M) GN=MMAR_1952 PE=4 SV=1	15	14	50	26.896	17.3865	18.0714	21.0029	23.2153	1.0394	0.860426	1.10534
nuoG	838	B2HGE2	>tr|B2HGE2|B2HGE2_MYCMM NADH dehydrogenase I (Chain G) NuoG (NADH-ubiquinone oxidoreductase chain G) OS=Mycobacterium marinum (strain ATCC BAA-535 / M) GN=nuoG PE=4 SV=1	39	39	55.7	85.178	73.4243	76.9474	89.4672	105.245	1.04798	0.860063	1.17636
MMAR_2136	2509	B2HN87	>tr|B2HN87|B2HN87_MYCMM Conserved hypothetical metal transport protein OS=Mycobacterium marinum (strain ATCC BAA-535 / M) GN=MMAR_2136 PE=4 SV=1	5	5	17.3	25.085	13.884	11.3431	13.1913	8.77774	0.816993	0.859893	0.665418
MMAR_0022	1305	B2HI67	>tr|B2HI67|B2HI67_MYCMM Conserved protein OS=Mycobacterium marinum (strain ATCC BAA-535 / M) GN=MMAR_0022 PE=4 SV=1	19	19	39	58.5	37.7735	43.67	50.7901	55.697	1.1561	0.859814	1.09661
dppD	1768	B2HK60	>tr|B2HK60|B2HK60_MYCMM Dipeptide-transport ATP-binding protein ABC transporter DppD OS=Mycobacterium marinum (strain ATCC BAA-535 / M) GN=dppD PE=3 SV=1	19	19	43.4	59.513	10.4158	8.24314	9.58724	13.3946	0.791404	0.859803	1.39713
MMAR_2648	3603	B2HSS0	>tr|B2HSS0|B2HSS0_MYCMM Oxidoreductase OS=Mycobacterium marinum (strain ATCC BAA-535 / M) GN=MMAR_2648 PE=4 SV=1	38	38	74.5	48.127	82.8591	72.3326	84.1287	64.5075	0.872959	0.859786	0.766772
obg	2314	B2HMG1	>sp|B2HMG1|OBG_MYCMM GTPase obg OS=Mycobacterium marinum (strain ATCC BAA-535 / M) GN=obg PE=3 SV=1	11	11	22.5	50.567	9.44624	6.19994	7.21971	11.8738	0.656339	0.858752	1.64464
snzP	2477	B2HN46	>tr|B2HN46|B2HN46_MYCMM Pyridoxal biosynthesis lyase PdxS OS=Mycobacterium marinum (strain ATCC BAA-535 / M) GN=snzP PE=3 SV=1	12	12	39.4	29.843	29.2625	17.4258	20.3055	31.5261	0.595501	0.858182	1.55259
MMAR_2283	2779	B2HPC8	>tr|B2HPC8|B2HPC8_MYCMM Conserved membrane protein OS=Mycobacterium marinum (strain ATCC BAA-535 / M) GN=MMAR_2283 PE=4 SV=1	5	5	27.3	19.277	13.8725	14.5134	16.9125	22.2815	1.0462	0.858149	1.31746
cdsA	1663	B2HJP1	>tr|B2HJP1|B2HJP1_MYCMM Phosphatidate cytidylyltransferase OS=Mycobacterium marinum (strain ATCC BAA-535 / M) GN=cdsA PE=3 SV=1	6	6	17.8	32.166	43.7057	41.2391	48.0945	55.7298	0.943563	0.857461	1.15876
MMAR_2108	2488	B2HN60	>tr|B2HN60|B2HN60_MYCMM Conserved protein OS=Mycobacterium marinum (strain ATCC BAA-535 / M) GN=MMAR_2108 PE=4 SV=1	8	8	37.6	22.025	13.8954	22.2516	25.9606	20.6407	1.60136	0.857131	0.795077
MMAR_4635	593	B2HF76	>tr|B2HF76|B2HF76_MYCMM Conserved exported or membrane protein OS=Mycobacterium marinum (strain ATCC BAA-535 / M) GN=MMAR_4635 PE=4 SV=1	9	9	42	22.664	22.3491	22.2751	26.0133	22.1614	0.996686	0.856294	0.851925
MMAR_0226	1860	B2HKJ0	>tr|B2HKJ0|B2HKJ0_MYCMM Uncharacterized protein OS=Mycobacterium marinum (strain ATCC BAA-535 / M) GN=MMAR_0226 PE=4 SV=1	9	9	38.1	22.462	8.90985	7.28015	8.50898	8.24535	0.817091	0.855585	0.969017
MMAR_2264	2763	B2HPA9	>tr|B2HPA9|B2HPA9_MYCMM Conserved integral membrane protein OS=Mycobacterium marinum (strain ATCC BAA-535 / M) GN=MMAR_2264 PE=4 SV=1	7	7	15.9	64.237	7.44971	8.84186	10.3374	13.927	1.18687	0.855328	1.34724
MMAR_0263	1883	B2HKM6	>tr|B2HKM6|B2HKM6_MYCMM Conserved membrane protein OS=Mycobacterium marinum (strain ATCC BAA-535 / M) GN=MMAR_0263 PE=4 SV=1	5	5	30	25.22	7.94025	8.29003	9.69275	7.21331	1.04405	0.855282	0.744197
htpX	3363	B2HRQ7	>sp|B2HRQ7|HTPX_MYCMM Protease HtpX homolog OS=Mycobacterium marinum (strain ATCC BAA-535 / M) GN=htpX PE=3 SV=1	8	8	36.4	30.88	28.2814	28.8393	33.7722	29.9071	1.01973	0.853936	0.885555
pknE	3409	B2HRZ7	>tr|B2HRZ7|B2HRZ7_MYCMM Transmembrane serine/threonine-protein kinase E PknE OS=Mycobacterium marinum (strain ATCC BAA-535 / M) GN=pknE PE=3 SV=1	22	22	42.6	63.871	42.2112	40.8514	47.8835	34.5786	0.967786	0.853143	0.72214
MMAR_3405	1466	B2HIS3	>tr|B2HIS3|B2HIS3_MYCMM Conserved hypothetical regulatory protein OS=Mycobacterium marinum (strain ATCC BAA-535 / M) GN=MMAR_3405 PE=4 SV=1	37	37	26.1	170.32	28.8063	35.6614	41.8064	41.8137	1.23797	0.853013	1.00018
MMAR_5353	2333	B2HMI8	>tr|B2HMI8|B2HMI8_MYCMM Short-chain type dehydrogenase/reductase OS=Mycobacterium marinum (strain ATCC BAA-535 / M) GN=MMAR_5353 PE=4 SV=1	11	11	48.4	27.338	34.2022	37.7515	44.2678	43.3235	1.10377	0.852797	0.978669
fadE34_1	1940	B2HKY2	>tr|B2HKY2|B2HKY2_MYCMM Acyl-CoA dehydrogenase FadE34_1 OS=Mycobacterium marinum (strain ATCC BAA-535 / M) GN=fadE34_1 PE=3 SV=1	13	13	34.3	43.242	8.96717	8.72463	10.2319	11.8411	0.972952	0.852691	1.15727
MMAR_2661	3611	B2HST0	>tr|B2HST0|B2HST0_MYCMM Uncharacterized protein OS=Mycobacterium marinum (strain ATCC BAA-535 / M) GN=MMAR_2661 PE=4 SV=1	7	7	30.5	20.422	5.96665	8.72463	10.2319	5.16016	1.46223	0.852691	0.504322
MMAR_2537	3391	B2HRV6	>tr|B2HRV6|B2HRV6_MYCMM Uncharacterized protein OS=Mycobacterium marinum (strain ATCC BAA-535 / M) GN=MMAR_2537 PE=4 SV=1	7	7	60.4	10.558	73.3899	75.1512	88.2307	64.1279	1.024	0.851758	0.726821
MMAR_2236	2739	B2HP81	>tr|B2HP81|B2HP81_MYCMM Conserved hypothetical membrane protein OS=Mycobacterium marinum (strain ATCC BAA-535 / M) GN=MMAR_2236 PE=4 SV=1	19	19	30.1	64.678	31.2934	35.1799	41.3084	46.9739	1.1242	0.85164	1.13715
MMAR_4195	3297	B2HRH2;B2HG48	>tr|B2HRH2|B2HRH2_MYCMM Short-chain type dehydrogenase/reductase OS=Mycobacterium marinum (strain ATCC BAA-535 / M) GN=MMAR_4195 PE=3 SV=1	23	23	70.4	29.09	53.0947	56.234	66.138	72.0458	1.05913	0.850254	1.08933
nuoL	833	B2HGD7	>tr|B2HGD7|B2HGD7_MYCMM NADH dehydrogenase I (Chain L) NuoL (NADH-ubiquinone oxidoreductase chain L) OS=Mycobacterium marinum (strain ATCC BAA-535 / M) GN=nuoL PE=3 SV=1	5	5	7.6	66.674	7.46118	6.72832	7.9171	7.73479	0.901778	0.849847	0.976972
MMAR_4066	3033	B2HQI1	>tr|B2HQI1|B2HQI1_MYCMM Uncharacterized protein OS=Mycobacterium marinum (strain ATCC BAA-535 / M) GN=MMAR_4066 PE=4 SV=1	9	9	27.7	21.581	6.43425	6.72832	7.9171	7.75662	1.0457	0.849847	0.97973
MMAR_1353	510	B2HEV5	>tr|B2HEV5|B2HEV5_MYCMM Uncharacterized protein OS=Mycobacterium marinum (strain ATCC BAA-535 / M) GN=MMAR_1353 PE=4 SV=1	8	8	27.8	30.984	13.3934	7.18637	8.45623	13.9161	0.536559	0.849831	1.64566
moxR2	1807	B2HKB0	>tr|B2HKB0|B2HKB0_MYCMM Methanol dehydrogenase transcriptional regulatory protein MoxR2 OS=Mycobacterium marinum (strain ATCC BAA-535 / M) GN=moxR2 PE=4 SV=1	19	18	49.8	34.634	51.0981	56.3982	66.4661	70.2765	1.10372	0.848526	1.05733
MMAR_4450	168	B2HDH3	>tr|B2HDH3|B2HDH3_MYCMM Uncharacterized protein OS=Mycobacterium marinum (strain ATCC BAA-535 / M) GN=MMAR_4450 PE=4 SV=1	13	13	32.3	34.636	12.88	8.63084	10.1791	8.26718	0.670098	0.847896	0.81217
MMAR_5547	2368	B2HMN1	>tr|B2HMN1|B2HMN1_MYCMM Uncharacterized protein OS=Mycobacterium marinum (strain ATCC BAA-535 / M) GN=MMAR_5547 PE=4 SV=1	1	1	27.5	5.2451	7.43825	7.20982	8.50898	8.25626	0.96929	0.847318	0.970299
MMAR_4369	3690	B2HT55	>tr|B2HT55|B2HT55_MYCMM Membrane glycine and proline rich protein OS=Mycobacterium marinum (strain ATCC BAA-535 / M) GN=MMAR_4369 PE=4 SV=1	10	10	20.6	32.845	29.7874	26.2208	30.971	30.9719	0.880265	0.846624	1.00003
nuoI	836	B2HGE0	>sp|B2HGE0|NUOI_MYCMM NADH-quinone oxidoreductase subunit I OS=Mycobacterium marinum (strain ATCC BAA-535 / M) GN=nuoI PE=3 SV=1	16	16	68.5	20.183	54.5663	49.4588	58.4319	59.8033	0.9064	0.846436	1.02347
MMAR_2020	2191	B2HM06	>tr|B2HM06|B2HM06_MYCMM Uncharacterized protein OS=Mycobacterium marinum (strain ATCC BAA-535 / M) GN=MMAR_2020 PE=4 SV=1	8	8	44.1	14.051	10.4158	11.8949	14.0585	24.3456	1.142	0.8461	1.73173
nuoB	843	B2HGE7	>sp|B2HGE7|NUOB_MYCMM NADH-quinone oxidoreductase subunit B OS=Mycobacterium marinum (strain ATCC BAA-535 / M) GN=nuoB PE=3 SV=1	7	7	29.9	20.224	19.8162	19.0344	22.5148	23.704	0.960547	0.845419	1.05282
MMAR_1536	885	B2HGK1	>tr|B2HGK1|B2HGK1_MYCMM Uncharacterized protein OS=Mycobacterium marinum (strain ATCC BAA-535 / M) GN=MMAR_1536 PE=4 SV=1	12	12	40.6	37.216	10.3814	7.7382	9.15362	4.61686	0.745388	0.84537	0.504375
secE	3520	B2HSG9	>tr|B2HSG9|B2HSG9_MYCMM Preprotein translocase (Tail-anchored membrane protein), SecE OS=Mycobacterium marinum (strain ATCC BAA-535 / M) GN=secE PE=4 SV=1	10	10	45.7	17.329	69.4198	63.9488	75.7252	73.2525	0.921189	0.844485	0.967346
MMAR_5203	1808	B2HKB1	>tr|B2HKB1|B2HKB1_MYCMM Conserved membrane protein OS=Mycobacterium marinum (strain ATCC BAA-535 / M) GN=MMAR_5203 PE=4 SV=1	25	25	43.4	47.495	61.0578	56.7624	67.2162	51.0474	0.92965	0.844475	0.759451
MMAR_2950	521	B2HEX1	>tr|B2HEX1|B2HEX1_MYCMM Oxidoreductase OS=Mycobacterium marinum (strain ATCC BAA-535 / M) GN=MMAR_2950 PE=4 SV=1	20	20	46.7	33.871	34.1792	28.8393	34.153	36.5444	0.843765	0.844413	1.07002
pknF_1	2997	B2HQB5	>tr|B2HQB5|B2HQB5_MYCMM Anchored-membrane serine/threonine-protein kinase PknF_1 OS=Mycobacterium marinum (strain ATCC BAA-535 / M) GN=pknF_1 PE=4 SV=1	18	18	31.2	53.377	58.5593	55.6588	65.9269	60.8572	0.950468	0.844249	0.9231
MMAR_0648	2844	B2HPT2	>tr|B2HPT2|B2HPT2_MYCMM Ketoacyl reductase OS=Mycobacterium marinum (strain ATCC BAA-535 / M) GN=MMAR_0648 PE=3 SV=1	4	4	17.1	26.898	6.43425	6.72832	7.96985	8.23443	1.0457	0.844222	1.0332
MMAR_5200	1805	B2HKA8	>tr|B2HKA8|B2HKA8_MYCMM Uncharacterized protein OS=Mycobacterium marinum (strain ATCC BAA-535 / M) GN=MMAR_5200 PE=4 SV=1	9	9	46.8	23.38	19.8506	19.5394	23.1594	18.0442	0.98432	0.843689	0.77913
MMAR_4494	204	B2HDL6	>tr|B2HDL6|B2HDL6_MYCMM Conserved hypothetical secreted protein OS=Mycobacterium marinum (strain ATCC BAA-535 / M) GN=MMAR_4494 PE=4 SV=1	9	9	43.8	22.562	20.8775	19.6331	23.3177	15.9583	0.940395	0.841985	0.684386
MMAR_0910	3361	B2HRQ5	>tr|B2HRQ5|B2HRQ5_MYCMM FAD-linked oxidoreductase OS=Mycobacterium marinum (strain ATCC BAA-535 / M) GN=MMAR_0910 PE=4 SV=1	17	17	30.6	44.186	8.44224	5.16662	6.14145	7.7457	0.611996	0.84127	1.26122
pvdS	485	B2HER3	>tr|B2HER3|B2HER3_MYCMM Transcriptional regulatory protein PvdS OS=Mycobacterium marinum (strain ATCC BAA-535 / M) GN=pvdS PE=4 SV=1	21	21	60.3	33.749	18.3217	18.4826	21.9756	19.6632	1.00878	0.841049	0.894772
fdxB	1505	B2HIY4	>tr|B2HIY4|B2HIY4_MYCMM Electron transfer protein FdxB OS=Mycobacterium marinum (strain ATCC BAA-535 / M) GN=fdxB PE=4 SV=1	20	20	26.2	75.331	44.139	58.3945	69.531	52.1231	1.32297	0.839834	0.749638
lpqL_1	2903	B2HQ09	>tr|B2HQ09|B2HQ09_MYCMM Lipoprotein aminopeptidase LpqL_1 OS=Mycobacterium marinum (strain ATCC BAA-535 / M) GN=lpqL_1 PE=4 SV=1	21	21	55.9	50.305	44.6868	38.3033	45.6214	35.6433	0.85715	0.83959	0.781285
cyp140A5	116	B2HD73	>tr|B2HD73|B2HD73_MYCMM Cytochrome P450 140A5 Cyp140A5 OS=Mycobacterium marinum (strain ATCC BAA-535 / M) GN=cyp140A5 PE=3 SV=1	21	21	47.9	48.815	16.371	16.0751	19.1745	17.0122	0.981925	0.83836	0.887229
cydC	3167	B2HQY7	>tr|B2HQY7|B2HQY7_MYCMM Cytochrome transmembrane ATP-binding protein ABC transporter CydC OS=Mycobacterium marinum (strain ATCC BAA-535 / M) GN=cydC PE=3 SV=1	12	12	25.4	58.669	8.94424	5.14317	6.14145	7.21331	0.575026	0.837452	1.17453
nuoC	842	B2HGE6	>sp|B2HGE6|NUOC_MYCMM NADH-quinone oxidoreductase subunit C OS=Mycobacterium marinum (strain ATCC BAA-535 / M) GN=nuoC PE=3 SV=1	17	17	63.4	26.987	25.8975	19.5862	23.4348	28.8642	0.756298	0.835777	1.23168
MMAR_0456	2436	B2HMY4	>tr|B2HMY4|B2HMY4_MYCMM Conserved protein OS=Mycobacterium marinum (strain ATCC BAA-535 / M) GN=MMAR_0456 PE=4 SV=1	12	12	36.1	35.599	7.95171	5.57777	6.68058	11.3305	0.701455	0.834923	1.69604
prcB	738	B2HFV6	>sp|B2HFV6|PSB_MYCMM Proteasome subunit beta OS=Mycobacterium marinum (strain ATCC BAA-535 / M) GN=prcB PE=3 SV=1	10	10	39.8	30.302	10.4044	4.66168	5.60232	5.65981	0.44805	0.832098	1.01026
cysK1	2006	B2HL85	>tr|B2HL85|B2HL85_MYCMM Cysteine synthase OS=Mycobacterium marinum (strain ATCC BAA-535 / M) GN=cysK1 PE=1 SV=1	8	8	23.9	32.474	5.95518	5.60121	6.73333	6.20311	0.940561	0.831864	0.921255
MMAR_4135	3252	B2HRB1	>tr|B2HRB1|B2HRB1_MYCMM Carbonic anhydrase OS=Mycobacterium marinum (strain ATCC BAA-535 / M) GN=MMAR_4135 PE=4 SV=1	11	11	86.5	17.825	16.3825	14.5369	17.5043	12.895	0.887342	0.830472	0.736672
MMAR_0811	3137	B2HQV1	>tr|B2HQV1|B2HQV1_MYCMM Transcriptional regulatory protein OS=Mycobacterium marinum (strain ATCC BAA-535 / M) GN=MMAR_0811 PE=4 SV=1	13	13	38.4	42.994	21.3681	14.49	17.4516	8.76682	0.678113	0.830295	0.502351
nuoH	837	B2HGE1	>tr|B2HGE1|B2HGE1_MYCMM NADH-quinone oxidoreductase subunit H OS=Mycobacterium marinum (strain ATCC BAA-535 / M) GN=nuoH PE=3 SV=1	6	6	17.9	46.477	6.94771	6.70488	8.07536	9.80977	0.965048	0.830288	1.21478
MMAR_5354	2334	B2HMI9	>tr|B2HMI9|B2HMI9_MYCMM Conserved hypothetical transmembrane protein OS=Mycobacterium marinum (strain ATCC BAA-535 / M) GN=MMAR_5354 PE=4 SV=1	11	11	13.9	70.192	18.8466	20.2084	24.3432	17.5555	1.07226	0.830147	0.721166
mpt64	2379	B2HMP6	>tr|B2HMP6|B2HMP6_MYCMM Immunogenic protein Mpt64 OS=Mycobacterium marinum (strain ATCC BAA-535 / M) GN=mpt64 PE=4 SV=1	13	13	53.5	25.305	7.44971	9.82829	11.8493	8.23443	1.31928	0.829443	0.694931
MMAR_3860	2611	B2HNL8	>tr|B2HNL8|B2HNL8_MYCMM Conserved hypothetical membrane protein OS=Mycobacterium marinum (strain ATCC BAA-535 / M) GN=MMAR_3860 PE=4 SV=1	3	3	14.6	24.84	5.47612	5.67155	6.83884	1.53168	1.03569	0.829315	0.223967
MMAR_0154	1617	B2HJF5	>tr|B2HJF5|B2HJF5_MYCMM Coenzyme F420-dependent oxidoreductase OS=Mycobacterium marinum (strain ATCC BAA-535 / M) GN=MMAR_0154 PE=4 SV=1	19	19	50	37.44	10.9293	9.15923	11.0464	18.5875	0.838043	0.829162	1.68268
uvrA	3185	B2HR07	>tr|B2HR07|B2HR07_MYCMM UvrABC system protein A OS=Mycobacterium marinum (strain ATCC BAA-535 / M) GN=uvrA PE=3 SV=1	51	50	48.5	106.3	65.005	79.4018	95.8081	89.2872	1.22147	0.828758	0.931938
MMAR_2224	2728	B2HP69	>tr|B2HP69|B2HP69_MYCMM Conserved hypothetical membrane protein OS=Mycobacterium marinum (strain ATCC BAA-535 / M) GN=MMAR_2224 PE=4 SV=1	6	6	32.1	16.922	12.3894	10.3098	12.4412	8.25626	0.832143	0.828684	0.663625
MMAR_0567	2682	B2HNY9	>tr|B2HNY9|B2HNY9_MYCMM Beta-1,3-glucanase OS=Mycobacterium marinum (strain ATCC BAA-535 / M) GN=MMAR_0567 PE=4 SV=1	6	6	16.8	32.108	14.4089	14.948	18.0435	12.884	1.03742	0.828445	0.714055
MMAR_3543	1744	B2HK18	>tr|B2HK18|B2HK18_MYCMM Conserved membrane protein OS=Mycobacterium marinum (strain ATCC BAA-535 / M) GN=MMAR_3543 PE=4 SV=1	47	46	46.3	103.89	52.6156	58.9463	71.3182	68.1578	1.12032	0.826525	0.955686
MMAR_0741	3075	B2HQN1	>tr|B2HQN1|B2HQN1_MYCMM Transmembrane protein OS=Mycobacterium marinum (strain ATCC BAA-535 / M) GN=MMAR_0741 PE=4 SV=1	10	10	63.5	14.24	10.4388	14.948	18.0962	19.6523	1.43197	0.826029	1.08599
MMAR_3295	1147	B2HHM3	>tr|B2HHM3|B2HHM3_MYCMM Exported protease OS=Mycobacterium marinum (strain ATCC BAA-535 / M) GN=MMAR_3295 PE=4 SV=1	16	16	43.3	55.549	14.888	15.4764	18.7409	9.79885	1.03952	0.82581	0.52286
gnd2	3671	B2HT24	>tr|B2HT24|B2HT24_MYCMM 6-phosphogluconate dehydrogenase, decarboxylating Gnd2 OS=Mycobacterium marinum (strain ATCC BAA-535 / M) GN=gnd2 PE=4 SV=1	12	12	35	36.165	9.92531	5.60121	6.78608	7.22423	0.564337	0.825397	1.06457
pgsA2	3631	B2HSW8	>tr|B2HSW8|B2HSW8_MYCMM CDP-diacylglycerol--glycerol-3-phosphate 3-phosphatidyltransferase PgsA2 OS=Mycobacterium marinum (strain ATCC BAA-535 / M) GN=pgsA2 PE=3 SV=1	3	3	14.4	22.867	5.46465	4.13329	5.01043	6.70275	0.756369	0.824937	1.33776
nuoK	834	B2HGD8	>sp|B2HGD8|NUOK_MYCMM NADH-quinone oxidoreductase subunit K OS=Mycobacterium marinum (strain ATCC BAA-535 / M) GN=nuoK PE=3 SV=1	4	4	13.1	10.816	9.92531	8.79497	10.6655	11.3633	0.886116	0.824618	1.06542
inhA	2786	B2HPD5	>tr|B2HPD5|B2HPD5_MYCMM Enoyl-[acyl-carrier-protein] reductase [NADH] OS=Mycobacterium marinum (strain ATCC BAA-535 / M) GN=inhA PE=3 SV=1	9	9	39.8	28.679	8.94424	8.74808	10.6127	11.3742	0.978068	0.824299	1.07175
ppiB	2503	B2HN77	>tr|B2HN77|B2HN77_MYCMM Peptidyl-prolyl cis-trans isomerase B PpiB OS=Mycobacterium marinum (strain ATCC BAA-535 / M) GN=ppiB PE=3 SV=1	12	12	54.2	30.996	85.4608	83.8993	101.832	97.4234	0.981728	0.823896	0.956703
rsmH	931	B2HGS5	>sp|B2HGS5|RSMH_MYCMM Ribosomal RNA small subunit methyltransferase H OS=Mycobacterium marinum (strain ATCC BAA-535 / M) GN=rsmH PE=3 SV=1	12	12	40.9	37.488	5.95518	4.61478	5.60232	6.67001	0.774919	0.823728	1.19058
MMAR_1272	452	B2HEM3	>tr|B2HEM3|B2HEM3_MYCMM Conserved protein OS=Mycobacterium marinum (strain ATCC BAA-535 / M) GN=MMAR_1272 PE=4 SV=1	16	16	96.7	9.6769	104.626	89.8288	109.064	96.2738	0.85857	0.823636	0.882729
mce4C	1238	B2HHY9	>tr|B2HHY9|B2HHY9_MYCMM MCE-family protein Mce4C OS=Mycobacterium marinum (strain ATCC BAA-535 / M) GN=mce4C PE=4 SV=1	15	15	38.5	37.489	26.7983	26.4787	32.1548	31.4606	0.988073	0.823476	0.978412
serB1	3156	B2HQX3	>tr|B2HQX3|B2HQX3_MYCMM Phosphoserine phosphatase SerB1 OS=Mycobacterium marinum (strain ATCC BAA-535 / M) GN=serB1 PE=4 SV=1	10	10	29.7	32.154	12.4009	9.71106	11.7965	11.8957	0.783093	0.823214	1.0084
MMAR_4884	1011	B2HH33	>tr|B2HH33|B2HH33_MYCMM Lipoprotein OS=Mycobacterium marinum (strain ATCC BAA-535 / M) GN=MMAR_4884 PE=4 SV=1	20	20	46.3	44.702	32.8108	38.2095	46.4243	39.7605	1.16454	0.823049	0.856459
pknF	3279	B2HRF0	>tr|B2HRF0|B2HRF0_MYCMM Anchored-membrane serine/threonine-protein kinase PknF OS=Mycobacterium marinum (strain ATCC BAA-535 / M) GN=pknF PE=4 SV=1	12	12	28.5	52.314	23.7978	22.7566	27.6835	20.6407	0.956246	0.822027	0.745595
lpqK	2879	B2HPX8	>tr|B2HPX8|B2HPX8_MYCMM Conserved lipoprotein, LpqK OS=Mycobacterium marinum (strain ATCC BAA-535 / M) GN=lpqK PE=4 SV=1	13	13	33.2	44.555	19.3372	16.5566	20.1472	19.0435	0.856208	0.821781	0.945216
mbtJ	2263	B2HM95	>tr|B2HM95|B2HM95_MYCMM Acetyl hydrolase MbtJ OS=Mycobacterium marinum (strain ATCC BAA-535 / M) GN=mbtJ PE=4 SV=1	11	11	32.3	35.177	25.7599	19.5159	23.7513	19.0981	0.757607	0.821678	0.804085
MMAR_2172	2536	B2HNC3	>tr|B2HNC3|B2HNC3_MYCMM Conserved membrane protein OS=Mycobacterium marinum (strain ATCC BAA-535 / M) GN=MMAR_2172 PE=4 SV=1	15	15	33.5	45.521	19.3601	19.0579	23.2122	20.6516	0.98439	0.821029	0.889687
MMAR_2091	2474	B2HN43	>tr|B2HN43|B2HN43_MYCMM Acyltransferase OS=Mycobacterium marinum (strain ATCC BAA-535 / M) GN=MMAR_2091 PE=4 SV=1	21	21	43	34.974	22.2918	22.7097	27.6835	23.2808	1.01874	0.820333	0.840963
lppX	1426	B2HIL8	>tr|B2HIL8|B2HIL8_MYCMM Conserved lipoprotein LppX OS=Mycobacterium marinum (strain ATCC BAA-535 / M) GN=lppX PE=4 SV=1	18	18	73.4	24.035	50.1629	56.1403	68.4527	57.7938	1.11916	0.820132	0.844288
MMAR_0885	3341	B2HRN0	>tr|B2HRN0|B2HRN0_MYCMM Glycosyl transferase-dolichol-P-sugar synthase OS=Mycobacterium marinum (strain ATCC BAA-535 / M) GN=MMAR_0885 PE=4 SV=1	14	14	63.3	23.033	19.383	22.2516	27.1443	20.6188	1.148	0.819752	0.759599
lpqL	2902	B2HQ08	>tr|B2HQ08|B2HQ08_MYCMM Lipoprotein aminopeptidase LpqL OS=Mycobacterium marinum (strain ATCC BAA-535 / M) GN=lpqL PE=4 SV=1	24	24	43.9	52.919	72.5465	63.9019	77.9872	77.3479	0.880841	0.819389	0.991802
rpsM	42	B2HCX1	>sp|B2HCX1|RS13_MYCMM 30S ribosomal protein S13 OS=Mycobacterium marinum (strain ATCC BAA-535 / M) GN=rpsM PE=3 SV=1	19	19	72.6	14.321	31.2361	34.6749	42.3339	60.098	1.11009	0.819082	1.41962
MMAR_0671	2861	B2HPV5	>tr|B2HPV5|B2HPV5_MYCMM Conserved membrane protein OS=Mycobacterium marinum (strain ATCC BAA-535 / M) GN=MMAR_0671 PE=4 SV=1	21	21	70.1	29.463	84.3766	93.0225	113.588	98.2068	1.10247	0.818948	0.86459
MMAR_0902	3355	B2HRP7	>tr|B2HRP7|B2HRP7_MYCMM Conserved hypothetical membrane protein OS=Mycobacterium marinum (strain ATCC BAA-535 / M) GN=MMAR_0902 PE=4 SV=1	9	9	47.7	19.244	10.9178	8.77152	10.7183	9.27738	0.803412	0.818372	0.865568
MMAR_2993	551	B2HF13	>tr|B2HF13|B2HF13_MYCMM Conserved membrane protein OS=Mycobacterium marinum (strain ATCC BAA-535 / M) GN=MMAR_2993 PE=4 SV=1	14	14	44.1	31.226	22.3491	18.9641	23.2122	24.2364	0.848537	0.816989	1.04412
mycP3_1	2626	B2HNR1	>tr|B2HNR1|B2HNR1_MYCMM Membrane-anchored serine protease (Mycosin), MycP3_1 OS=Mycobacterium marinum (strain ATCC BAA-535 / M) GN=mycP3_1 PE=4 SV=1	7	7	34.4	47.717	15.8805	17.5899	21.542	17.0122	1.10764	0.816541	0.78972
MMAR_1113	56	B2HCZ7	>tr|B2HCZ7|B2HCZ7_MYCMM Conserved hypothetical transmembrane protein OS=Mycobacterium marinum (strain ATCC BAA-535 / M) GN=MMAR_1113 PE=4 SV=1	5	5	40.4	17.672	7.94025	8.26659	10.1264	10.8527	1.0411	0.816342	1.07173
MMAR_4687	631	B2HFC9	>tr|B2HFC9|B2HFC9_MYCMM Conserved hypothetical membrane protein OS=Mycobacterium marinum (strain ATCC BAA-535 / M) GN=MMAR_4687 PE=4 SV=1	8	7	26	33.99	14.3745	12.8814	15.7814	17.5446	0.896127	0.816235	1.11172
lpqE	1539	B2HJ25	>tr|B2HJ25|B2HJ25_MYCMM Conserved hypothetical lipoprotein LpqE OS=Mycobacterium marinum (strain ATCC BAA-535 / M) GN=lpqE PE=4 SV=1	7	7	29.7	19.36	37.1912	39.7009	48.6452	29.3311	1.06748	0.816131	0.602959
ssp	15	B2HCU2	>tr|B2HCU2|B2HCU2_MYCMM Protease iv, Ssp OS=Mycobacterium marinum (strain ATCC BAA-535 / M) GN=ssp PE=4 SV=1	26	26	50	63.635	31.3736	22.6393	27.789	23.7477	0.721603	0.814687	0.854571
MMAR_5172	1787	B2HK81	>tr|B2HK81|B2HK81_MYCMM Conserved membrane protein OS=Mycobacterium marinum (strain ATCC BAA-535 / M) GN=MMAR_5172 PE=4 SV=1	28	28	61.1	36.45	76.8007	60.086	73.7797	66.4952	0.782362	0.814397	0.901266
lpqF	1547	B2HJ33	>tr|B2HJ33|B2HJ33_MYCMM Conserved hypothetical lipoprotein LpqF OS=Mycobacterium marinum (strain ATCC BAA-535 / M) GN=lpqF PE=4 SV=1	17	17	36.8	49.342	19.2913	17.5196	21.542	17.5227	0.908161	0.813276	0.813421
MMAR_5218	1822	B2HKC6	>tr|B2HKC6|B2HKC6_MYCMM Conserved hypothetical proline rich protein OS=Mycobacterium marinum (strain ATCC BAA-535 / M) GN=MMAR_5218 PE=4 SV=1	2	2	22.1	14.064	15.4014	16.5566	20.3583	23.7804	1.07501	0.813263	1.1681
rplB	3573	B2HSN4	>sp|B2HSN4|RL2_MYCMM 50S ribosomal protein L2 OS=Mycobacterium marinum (strain ATCC BAA-535 / M) GN=rplB PE=3 SV=1	29	29	77.5	30.457	185.5	185.342	227.926	211.676	0.999146	0.813167	0.928705
aceAb	145	B2HDC4	>tr|B2HDC4|B2HDC4_MYCMM Isocitrate lyase AceAb OS=Mycobacterium marinum (strain ATCC BAA-535 / M) GN=aceAb PE=4 SV=1	48	48	47.9	85.237	61.5484	71.3462	87.8498	98.9987	1.15919	0.812138	1.12691
MMAR_0777	3108	B2HQR7	>tr|B2HQR7|B2HQR7_MYCMM Conserved secreted protein OS=Mycobacterium marinum (strain ATCC BAA-535 / M) GN=MMAR_0777 PE=4 SV=1	9	9	55	17.023	13.9184	16.0517	19.7664	18.1315	1.15327	0.81207	0.917292
MMAR_3708	2269	B2HMA4	>tr|B2HMA4|B2HMA4_MYCMM Conserved membrane permease OS=Mycobacterium marinum (strain ATCC BAA-535 / M) GN=MMAR_3708 PE=4 SV=1	6	6	13.6	44.984	11.8874	12.8579	15.8342	27.843	1.08164	0.812035	1.75841
MMAR_2185	2548	B2HND6	>tr|B2HND6|B2HND6_MYCMM Oxidoreductase OS=Mycobacterium marinum (strain ATCC BAA-535 / M) GN=MMAR_2185 PE=4 SV=1	11	11	31	43.932	11.4084	11.4134	14.0585	10.82	1.00045	0.811851	0.769636
ethA	2375	B2HMP0	>tr|B2HMP0|B2HMP0_MYCMM Monooxygenase EthA OS=Mycobacterium marinum (strain ATCC BAA-535 / M) GN=ethA PE=4 SV=1	33	33	53.4	54.891	78.3067	59.545	73.4104	60.8681	0.760408	0.811125	0.829148
MMAR_4193	3295	B2HRH0	>tr|B2HRH0|B2HRH0_MYCMM Conserved membrane protein OS=Mycobacterium marinum (strain ATCC BAA-535 / M) GN=MMAR_4193 PE=4 SV=1	15	15	46.4	26.433	23.3302	24.2714	29.9455	17.0012	1.04034	0.810518	0.56774
MMAR_4311	3494	B2HSD9	>tr|B2HSD9|B2HSD9_MYCMM Integral membrane protein OS=Mycobacterium marinum (strain ATCC BAA-535 / M) GN=MMAR_4311 PE=4 SV=1	6	6	23	25.402	19.3372	20.5961	25.4214	23.6931	1.06511	0.810187	0.932012
MMAR_2952	523	B2HEX3	>tr|B2HEX3|B2HEX3_MYCMM Uncharacterized protein OS=Mycobacterium marinum (strain ATCC BAA-535 / M) GN=MMAR_2952 PE=4 SV=1	9	9	32.7	28.998	9.43477	7.76165	9.58724	13.4055	0.822664	0.809581	1.39827
MMAR_4170	3275	B2HRE6	>tr|B2HRE6|B2HRE6_MYCMM Conserved transmembrane ATP-binding protein ABC transporter OS=Mycobacterium marinum (strain ATCC BAA-535 / M) GN=MMAR_4170 PE=4 SV=1	34	34	43.8	85.309	33.267	41.791	51.7101	68.0596	1.25623	0.808178	1.31617
rfbD	2089	B2HLL0	>tr|B2HLL0|B2HLL0_MYCMM O-antigen/lipopolysaccharide transport integral membrane protein ABC transporter RfbD OS=Mycobacterium marinum (strain ATCC BAA-535 / M) GN=rfbD PE=4 SV=1	6	6	12	31.613	10.4388	10.8382	13.4139	14.4375	1.03826	0.80798	1.07631
secA1	480	B2HEQ6	>tr|B2HEQ6|B2HEQ6_MYCMM Protein translocase subunit SecA OS=Mycobacterium marinum (strain ATCC BAA-535 / M) GN=secA1 PE=3 SV=1	70	70	55.2	106.16	146.347	154.975	191.903	207.004	1.05896	0.807569	1.07869
MMAR_4981	1234	B2HHY5	>tr|B2HHY5|B2HHY5_MYCMM Conserved hypothetical alanine and valine rich MCE-associated protein OS=Mycobacterium marinum (strain ATCC BAA-535 / M) GN=MMAR_4981 PE=4 SV=1	11	11	44.4	25.633	26.7983	20.0443	24.8296	22.1396	0.747968	0.807275	0.891662
mce1C	2402	B2HMU2	>tr|B2HMU2|B2HMU2_MYCMM MCE-family protein Mce1C OS=Mycobacterium marinum (strain ATCC BAA-535 / M) GN=mce1C PE=4 SV=1	38	38	49.3	54.507	99.7551	111.458	138.376	87.7228	1.11732	0.805473	0.633944
MMAR_1042	1	B2HCS8	>tr|B2HCS8|B2HCS8_MYCMM Conserved protein OS=Mycobacterium marinum (strain ATCC BAA-535 / M) GN=MMAR_1042 PE=4 SV=1	6	6	39.3	23.998	14.8765	15.4764	19.2272	19.0762	1.04033	0.804921	0.992146
MMAR_0552	2669	B2HNX4	>tr|B2HNX4|B2HNX4_MYCMM Conserved hypothetical membrane protein OS=Mycobacterium marinum (strain ATCC BAA-535 / M) GN=MMAR_0552 PE=4 SV=1	11	11	33.7	44.693	6.93625	7.23326	8.99536	3.60666	1.04282	0.80411	0.400946
MMAR_0883	3339	B2HRM8	>tr|B2HRM8|B2HRM8_MYCMM Conserved membrane protein OS=Mycobacterium marinum (strain ATCC BAA-535 / M) GN=MMAR_0883 PE=4 SV=1	13	13	23.1	59.083	36.2102	45.4662	56.5507	56.2512	1.25562	0.80399	0.994704
MMAR_2315	2913	B2HQ21	>tr|B2HQ21|B2HQ21_MYCMM Conserved hypothetical methyltransferase OS=Mycobacterium marinum (strain ATCC BAA-535 / M) GN=MMAR_2315 PE=4 SV=1	17	17	48.3	32.218	57.0762	55.024	68.4527	26.2786	0.964044	0.803825	0.383894
MMAR_0611	2698	B2HP31	>tr|B2HP31|B2HP31_MYCMM Iron-sulphur-binding reductase OS=Mycobacterium marinum (strain ATCC BAA-535 / M) GN=MMAR_0611 PE=4 SV=1	61	61	53.5	104.4	177.72	180.28	224.521	183.724	1.0144	0.802952	0.818291
MMAR_0021	1304	B2HI66	>tr|B2HI66|B2HI66_MYCMM Conserved hypothetical membrane protein OS=Mycobacterium marinum (strain ATCC BAA-535 / M) GN=MMAR_0021 PE=4 SV=1	11	11	70.3	17.069	23.2958	22.8269	28.4336	28.9952	0.979871	0.802814	1.01975
MMAR_1588	1065	B2HHA8	>tr|B2HHA8|B2HHA8_MYCMM Uncharacterized protein OS=Mycobacterium marinum (strain ATCC BAA-535 / M) GN=MMAR_1588 PE=4 SV=1	16	15	49.7	40.328	27.8138	18.9406	23.593	20.6407	0.68098	0.802806	0.874862
sodA	2369	B2HMN2	>tr|B2HMN2|B2HMN2_MYCMM Superoxide dismutase OS=Mycobacterium marinum (strain ATCC BAA-535 / M) GN=sodA PE=3 SV=1	7	7	23.2	23.196	7.95171	7.7382	9.64	7.73479	0.973149	0.802718	0.802364
opcA	2750	B2HP96	>tr|B2HP96|B2HP96_MYCMM OXPP cycle protein OpcA OS=Mycobacterium marinum (strain ATCC BAA-535 / M) GN=opcA PE=4 SV=1	11	11	37	32.712	8.45371	4.06295	5.06319	4.11721	0.480612	0.80245	0.813167
MMAR_1668	1118	B2HHI6	>tr|B2HHI6|B2HHI6_MYCMM Transferase OS=Mycobacterium marinum (strain ATCC BAA-535 / M) GN=MMAR_1668 PE=4 SV=1	16	16	60.8	27.495	28.2699	24.3417	30.4319	29.8744	0.861046	0.799875	0.98168
MMAR_0169	1622	B2HJH0	>tr|B2HJH0|B2HJH0_MYCMM Conserved protein OS=Mycobacterium marinum (strain ATCC BAA-535 / M) GN=MMAR_0169 PE=4 SV=1	6	6	23.8	19.172	7.43825	4.13329	5.16869	3.60666	0.555681	0.799678	0.697789
murG	923	B2HGR6	>sp|B2HGR6|MURG_MYCMM UDP-N-acetylglucosamine--N-acetylmuramyl-(pentapeptide) pyrophosphoryl-undecaprenol N-acetylglucosamine transferase OS=Mycobacterium marinum (strain ATCC BAA-535 / M) GN=murG PE=3 SV=1	15	15	38.6	41.02	41.7092	36.0491	45.0823	34.524	0.864295	0.799628	0.765799
MMAR_5169	1784	B2HK78	>tr|B2HK78|B2HK78_MYCMM Anion transporter ATPase OS=Mycobacterium marinum (strain ATCC BAA-535 / M) GN=MMAR_5169 PE=4 SV=1	22	22	53.1	41.302	34.248	30.3541	37.9681	44.4102	0.886301	0.799463	1.16967
MMAR_2655	3607	B2HSS5	>tr|B2HSS5|B2HSS5_MYCMM Transcriptional regulatory protein OS=Mycobacterium marinum (strain ATCC BAA-535 / M) GN=MMAR_2655 PE=4 SV=1	9	9	41.7	20.919	6.94771	7.23326	9.04811	3.61757	1.0411	0.799422	0.399815
MMAR_5201	1806	B2HKA9	>tr|B2HKA9|B2HKA9_MYCMM Conserved protein OS=Mycobacterium marinum (strain ATCC BAA-535 / M) GN=MMAR_5201 PE=4 SV=1	15	15	36.9	40.73	25.2923	20.643	25.8551	20.6297	0.816177	0.798413	0.797899
MMAR_0963	3513	B2HSG2	>tr|B2HSG2|B2HSG2_MYCMM Conserved hypothetical membrane protein OS=Mycobacterium marinum (strain ATCC BAA-535 / M) GN=MMAR_0963 PE=4 SV=1	19	19	45.7	31.996	48.5996	48.3317	60.5884	60.3794	0.994488	0.797706	0.99655
MMAR_5303	2068	B2HLH5	>tr|B2HLH5|B2HLH5_MYCMM Conserved hypothetical membrane protein OS=Mycobacterium marinum (strain ATCC BAA-535 / M) GN=MMAR_5303 PE=4 SV=1	6	6	36	12.963	11.4084	11.2962	14.1641	19.0981	0.990169	0.797527	1.34835
MMAR_2093	2476	B2HN45	>tr|B2HN45|B2HN45_MYCMM Uncharacterized protein OS=Mycobacterium marinum (strain ATCC BAA-535 / M) GN=MMAR_2093 PE=3 SV=1	25	25	51	38.697	38.7431	34.922	43.793	41.8028	0.901373	0.797432	0.954553
ccsB	3331	B2HRM0	>tr|B2HRM0|B2HRM0_MYCMM Cytochrome C-type biogenesis protein, CcsB OS=Mycobacterium marinum (strain ATCC BAA-535 / M) GN=ccsB PE=4 SV=1	4	4	17.4	35.94	9.4577	7.71475	9.69275	8.25626	0.815711	0.79593	0.851797
mmpL5	3550	B2HSK4	>tr|B2HSK4|B2HSK4_MYCMM Conserved transmembrane transport protein, MmpL5 OS=Mycobacterium marinum (strain ATCC BAA-535 / M) GN=mmpL5 PE=4 SV=1	30	29	42.2	104.96	39.6898	46.981	59.0353	52.6664	1.18371	0.795812	0.892117
cysE	2007	B2HL86	>tr|B2HL86|B2HL86_MYCMM Serine acetyltransferase OS=Mycobacterium marinum (strain ATCC BAA-535 / M) GN=cysE PE=3 SV=1	9	9	37.8	24.487	21.8242	17.5665	22.0812	13.9379	0.804909	0.795542	0.631212
MMAR_5182	1792	B2HK90	>tr|B2HK90|B2HK90_MYCMM Anti-anti-sigma regulatory factor OS=Mycobacterium marinum (strain ATCC BAA-535 / M) GN=MMAR_5182 PE=4 SV=1	13	13	30.2	32.555	15.3441	10.2394	12.8748	6.18128	0.667321	0.79531	0.480108
cdh	1491	B2HIW3	>tr|B2HIW3|B2HIW3_MYCMM CDP-diacylglycerol pyrophosphatase OS=Mycobacterium marinum (strain ATCC BAA-535 / M) GN=cdh PE=3 SV=1	7	7	45.5	28.569	7.42678	4.10985	5.16869	5.68164	0.553382	0.795142	1.09924
rpsT	2290	B2HMC9	>sp|B2HMC9|RS20_MYCMM 30S ribosomal protein S20 OS=Mycobacterium marinum (strain ATCC BAA-535 / M) GN=rpsT PE=3 SV=1	6	6	40.2	9.6099	10.4273	13.985	17.6099	16.0347	1.34119	0.79416	0.910554
secD	2498	B2HN72	>tr|B2HN72|B2HN72_MYCMM Protein translocase subunit SecD OS=Mycobacterium marinum (strain ATCC BAA-535 / M) GN=secD PE=3 SV=1	9	9	15.3	64.184	40.2835	38.3033	48.2527	48.5055	0.950844	0.793806	1.00524
MMAR_3757	2309	B2HMF3	>tr|B2HMF3|B2HMF3_MYCMM Adenylate or guanylate cyclase OS=Mycobacterium marinum (strain ATCC BAA-535 / M) GN=MMAR_3757 PE=4 SV=1	28	28	39.9	78.612	53.0947	50.5156	63.7704	60.879	0.951425	0.792148	0.954659
MMAR_3391	1456	B2HIR0	>tr|B2HIR0|B2HIR0_MYCMM Uncharacterized protein OS=Mycobacterium marinum (strain ATCC BAA-535 / M) GN=MMAR_3391 PE=4 SV=1	14	14	38.6	46.923	6.45718	10.7913	13.6249	7.22423	1.67121	0.792025	0.530222
MMAR_1264	445	B2HEL5	>tr|B2HEL5|B2HEL5_MYCMM Two-component system membrane associated sensor kinase OS=Mycobacterium marinum (strain ATCC BAA-535 / M) GN=MMAR_1264 PE=4 SV=1	27	27	36.3	59.605	27.8023	24.1776	30.5374	35.0782	0.869625	0.791737	1.1487
MMAR_5159	1775	B2HK68	>tr|B2HK68|B2HK68_MYCMM Membrane-associated serine protease OS=Mycobacterium marinum (strain ATCC BAA-535 / M) GN=MMAR_5159 PE=4 SV=1	12	12	34.5	41.201	29.8103	23.1912	29.3009	28.3536	0.777957	0.791484	0.967672
MMAR_3109	757	B2HFY0	>tr|B2HFY0|B2HFY0_MYCMM Dehydrogenase OS=Mycobacterium marinum (strain ATCC BAA-535 / M) GN=MMAR_3109 PE=3 SV=1	26	26	64.5	31.111	51.0981	49.1415	62.1003	58.3044	0.961708	0.791324	0.938875
rsbW	296	B2HDY9	>tr|B2HDY9|B2HDY9_MYCMM Anti-sigma factor RsbW OS=Mycobacterium marinum (strain ATCC BAA-535 / M) GN=rsbW PE=4 SV=1	5	5	32.6	18.495	4.46066	6.17649	7.81159	11.3524	1.38466	0.790683	1.45327
trmD	1644	B2HJL5	>tr|B2HJL5|B2HJL5_MYCMM tRNA (guanine-N(1)-)-methyltransferase OS=Mycobacterium marinum (strain ATCC BAA-535 / M) GN=trmD PE=3 SV=1	4	4	24.3	25.488	9.41184	12.9752	16.4261	18.6093	1.3786	0.789912	1.13291
MMAR_2323	2921	B2HQ29	>tr|B2HQ29|B2HQ29_MYCMM Conserved hypothetical transmembrane protein OS=Mycobacterium marinum (strain ATCC BAA-535 / M) GN=MMAR_2323 PE=4 SV=1	19	19	26.3	70.5	26.8327	30.9997	39.269	25.323	1.15529	0.78942	0.64486
pbpA	1301	B2HI63	>tr|B2HI63|B2HI63_MYCMM Penicillin-binding protein PbpA OS=Mycobacterium marinum (strain ATCC BAA-535 / M) GN=pbpA PE=4 SV=1	23	23	46	51.424	33.2899	36.7416	46.5826	35.6761	1.10369	0.788741	0.765867
MMAR_5292	2059	B2HLG4	>tr|B2HLG4|B2HLG4_MYCMM UPF0145 protein MMAR_5292 OS=Mycobacterium marinum (strain ATCC BAA-535 / M) GN=MMAR_5292 PE=3 SV=1	7	7	49.6	13.626	2.96613	3.09997	3.93217	11.8629	1.04512	0.78836	3.01689
MMAR_2156	2523	B2HNA7	>tr|B2HNA7|B2HNA7_MYCMM Conserved protein OS=Mycobacterium marinum (strain ATCC BAA-535 / M) GN=MMAR_2156 PE=4 SV=1	6	6	36.8	19.394	6.42279	6.70488	8.50898	7.22423	1.04392	0.787976	0.849012
MMAR_2906	341	B2HE66	>tr|B2HE66|B2HE66_MYCMM Conserved hypothetical membrane protein OS=Mycobacterium marinum (strain ATCC BAA-535 / M) GN=MMAR_2906 PE=3 SV=1	16	16	42.5	38.075	10.9178	10.3098	13.0858	12.895	0.944306	0.787861	0.985416
MMAR_0922	3373	B2HRR7	>tr|B2HRR7|B2HRR7_MYCMM ABC transporter, ATP-binding protein OS=Mycobacterium marinum (strain ATCC BAA-535 / M) GN=MMAR_0922 PE=3 SV=1	7	7	34.8	25.836	10.9293	9.75795	12.3884	13.927	0.892825	0.787668	1.1242
nuoA	844	B2HGE8	>tr|B2HGE8|B2HGE8_MYCMM NADH-quinone oxidoreductase subunit A OS=Mycobacterium marinum (strain ATCC BAA-535 / M) GN=nuoA PE=3 SV=1	2	2	13.6	17.604	11.9218	9.87519	12.5467	11.9066	0.828328	0.787077	0.948984
mce1F	2405	B2HMU5	>tr|B2HMU5|B2HMU5_MYCMM MCE-family protein Mce1F OS=Mycobacterium marinum (strain ATCC BAA-535 / M) GN=mce1F PE=4 SV=1	21	21	60	54.434	82.9738	78.1683	99.3594	56.729	0.942085	0.786723	0.570948
MMAR_1644	1100	B2HHG2	>tr|B2HHG2|B2HHG2_MYCMM Monooxygenase OS=Mycobacterium marinum (strain ATCC BAA-535 / M) GN=MMAR_1644 PE=4 SV=1	24	24	39.7	57.742	44.6639	41.3095	52.513	52.6227	0.924897	0.786652	1.00209
MMAR_4673	620	B2HFB5	>tr|B2HFB5|B2HFB5_MYCMM Conserved protein OS=Mycobacterium marinum (strain ATCC BAA-535 / M) GN=MMAR_4673 PE=4 SV=1	11	11	33	36.189	6.46865	3.55801	4.52406	10.364	0.55004	0.786466	2.29086
glpD2	279	B2HDW7	>tr|B2HDW7|B2HDW7_MYCMM Glycerol-3-phosphate dehydrogenase GlpD2 OS=Mycobacterium marinum (strain ATCC BAA-535 / M) GN=glpD2 PE=3 SV=1	28	28	38.6	63.262	71.4622	68.6339	87.3107	60.4121	0.960423	0.786088	0.691921
MMAR_1587	1064	B2HHA7	>tr|B2HHA7|B2HHA7_MYCMM Uncharacterized protein OS=Mycobacterium marinum (strain ATCC BAA-535 / M) GN=MMAR_1587 PE=4 SV=1	13	13	47.8	23.471	11.3854	13.4098	17.0707	15.4696	1.1778	0.785541	0.906205
MMAR_2716	3646	B2HSY4	>tr|B2HSY4|B2HSY4_MYCMM Conserved hypothetical membrane protein OS=Mycobacterium marinum (strain ATCC BAA-535 / M) GN=MMAR_2716 PE=4 SV=1	11	11	26.3	49.111	13.8954	17.5899	22.4093	17.5446	1.26588	0.78494	0.782915
rplY	186	B2HDJ4	>tr|B2HDJ4|B2HDJ4_MYCMM 50S ribosomal protein L25 OS=Mycobacterium marinum (strain ATCC BAA-535 / M) GN=rplY PE=3 SV=1	11	11	30.4	22.369	28.7834	24.4715	31.182	37.1204	0.850195	0.784795	1.19044
rpsA	3177	B2HQZ7	>tr|B2HQZ7|B2HQZ7_MYCMM 30S ribosomal protein S1 OS=Mycobacterium marinum (strain ATCC BAA-535 / M) GN=rpsA PE=3 SV=1	39	38	55.9	53.104	56.0493	49.9872	63.7177	50.5696	0.891843	0.784511	0.793651
MMAR_2339	2935	B2HQ45	>tr|B2HQ45|B2HQ45_MYCMM SAM-dependent methyltransferase OS=Mycobacterium marinum (strain ATCC BAA-535 / M) GN=MMAR_2339 PE=4 SV=1	14	14	51.4	24.2	39.6783	39.7243	50.7374	24.2473	1.00116	0.78294	0.477898
MMAR_5229	1832	B2HKD7	>tr|B2HKD7|B2HKD7_MYCMM UDP-N-acetylmuramyl tripeptide synthase OS=Mycobacterium marinum (strain ATCC BAA-535 / M) GN=MMAR_5229 PE=4 SV=1	8	8	20.1	40.434	7.92878	9.27646	11.8493	9.79885	1.16997	0.782872	0.826958
MMAR_0440	2425	B2HMW8	>tr|B2HMW8|B2HMW8_MYCMM Conserved transmembrane protein OS=Mycobacterium marinum (strain ATCC BAA-535 / M) GN=MMAR_0440 PE=4 SV=1	4	4	22.7	24.391	10.4273	9.73451	12.4412	10.8309	0.933559	0.782444	0.870569
mmpL5_4	1879	B2HKL8	>tr|B2HKL8|B2HKL8_MYCMM Conserved transmembrane transport protein, MmpL5_4 OS=Mycobacterium marinum (strain ATCC BAA-535 / M) GN=mmpL5_4 PE=4 SV=1	25	23	28.7	105.22	34.2824	31.0466	39.7026	40.2493	0.905612	0.781979	1.01377
MMAR_4702	639	B2HFE4	>tr|B2HFE4|B2HFE4_MYCMM Conserved hypothetical membrane protein OS=Mycobacterium marinum (strain ATCC BAA-535 / M) GN=MMAR_4702 PE=4 SV=1	10	10	40.6	26.19	11.8874	12.3764	15.8342	13.9161	1.04114	0.781627	0.878861
parB	2636	B2HNT2	>tr|B2HNT2|B2HNT2_MYCMM Chromosome partitioning protein ParB OS=Mycobacterium marinum (strain ATCC BAA-535 / M) GN=parB PE=4 SV=1	24	24	62.4	34.939	36.7122	21.0776	26.9861	29.9835	0.574132	0.781055	1.11107
MMAR_0884	3340	B2HRM9	>tr|B2HRM9|B2HRM9_MYCMM Conserved hypothetical membrane protein OS=Mycobacterium marinum (strain ATCC BAA-535 / M) GN=MMAR_0884 PE=4 SV=1	4	4	5.1	62.39	6.43425	5.71845	7.32521	9.28829	0.888751	0.780652	1.26799
MMAR_2394	2983	B2HQA1	>tr|B2HQA1|B2HQA1_MYCMM Uncharacterized protein OS=Mycobacterium marinum (strain ATCC BAA-535 / M) GN=MMAR_2394 PE=4 SV=1	18	18	91.9	15.085	41.6748	44.5032	57.0371	84.0204	1.06787	0.780251	1.47308
mce3D_1	3025	B2HQG9	>tr|B2HQG9|B2HQG9_MYCMM MCE-family protein Mce3D_1 OS=Mycobacterium marinum (strain ATCC BAA-535 / M) GN=mce3D_1 PE=4 SV=1	10	10	28.1	47.673	16.8845	14.948	19.1745	14.9699	0.885311	0.779578	0.780721
embB	2337	B2HMJ2	>tr|B2HMJ2|B2HMJ2_MYCMM Integral membrane indolylacetylinositol arabinosyltransferase EmbB OS=Mycobacterium marinum (strain ATCC BAA-535 / M) GN=embB PE=4 SV=1	30	30	28.3	116.17	53.0717	51.7365	66.3901	56.2512	0.974841	0.77928	0.847283
MMAR_4365	3686	B2HT51	>tr|B2HT51|B2HT51_MYCMM Conserved protein OS=Mycobacterium marinum (strain ATCC BAA-535 / M) GN=MMAR_4365 PE=4 SV=1	12	12	41.4	27.854	11.4084	11.8715	15.2423	17.49	1.04059	0.778851	1.14746
MMAR_3750	2302	B2HME6	>tr|B2HME6|B2HME6_MYCMM Uncharacterized protein OS=Mycobacterium marinum (strain ATCC BAA-535 / M) GN=MMAR_3750 PE=4 SV=1	12	12	35.9	38.544	11.4084	8.72463	11.2046	1.02112	0.764757	0.778663	0.0911334
MMAR_3389	1455	B2HIQ8	>tr|B2HIQ8|B2HIQ8_MYCMM Fatty-acid-CoA ligase OS=Mycobacterium marinum (strain ATCC BAA-535 / M) GN=MMAR_3389 PE=4 SV=1	25	25	37.2	66.043	31.2131	28.9799	37.218	30.9501	0.928454	0.778655	0.83159
MMAR_2314	2912	B2HQ20	>tr|B2HQ20|B2HQ20_MYCMM Uncharacterized protein OS=Mycobacterium marinum (strain ATCC BAA-535 / M) GN=MMAR_2314 PE=4 SV=1	8	8	28.6	30.653	5.46465	6.19994	7.96985	4.13905	1.13455	0.777924	0.519338
MMAR_2317	2915	B2HQ23	>tr|B2HQ23|B2HQ23_MYCMM Conserved hypothetical O-methyltransferase OS=Mycobacterium marinum (strain ATCC BAA-535 / M) GN=MMAR_2317 PE=4 SV=1	7	7	24.2	30.647	5.45319	6.19994	7.96985	6.70275	1.13694	0.777924	0.841014
rplU	2316	B2HMG3	>sp|B2HMG3|RL21_MYCMM 50S ribosomal protein L21 OS=Mycobacterium marinum (strain ATCC BAA-535 / M) GN=rplU PE=3 SV=1	13	13	63.1	11.001	26.7639	23.2849	29.9455	51.1566	0.870012	0.777577	1.70832
fadE9	33	B2HCW2	>tr|B2HCW2|B2HCW2_MYCMM Acyl-CoA dehydrogenase, FadE9 OS=Mycobacterium marinum (strain ATCC BAA-535 / M) GN=fadE9 PE=3 SV=1	15	15	44.4	41.629	7.91731	3.55801	4.57681	7.22423	0.449397	0.7774	1.57844
phoY2	989	B2HH08	>tr|B2HH08|B2HH08_MYCMM Phosphate-transport system regulatory protein, PhoY2 OS=Mycobacterium marinum (strain ATCC BAA-535 / M) GN=phoY2 PE=4 SV=1	15	15	62.2	24.668	10.4388	11.4134	14.7032	13.3946	1.09337	0.776257	0.910999
MMAR_2367	2958	B2HQ73	>tr|B2HQ73|B2HQ73_MYCMM Ketoacyl reductase OS=Mycobacterium marinum (strain ATCC BAA-535 / M) GN=MMAR_2367 PE=3 SV=1	19	19	52.8	28.229	54.0872	59.9093	77.2371	68.6247	1.10764	0.775655	0.888494
MMAR_2327	2923	B2HQ33	>tr|B2HQ33|B2HQ33_MYCMM Conserved hypothetical transmembrane protein OS=Mycobacterium marinum (strain ATCC BAA-535 / M) GN=MMAR_2327 PE=4 SV=1	8	8	16.7	55.733	22.8282	22.7566	29.3536	8.25626	0.996861	0.775256	0.281269
MMAR_2825	147	B2HDC8	>tr|B2HDC8|B2HDC8_MYCMM Conserved protein OS=Mycobacterium marinum (strain ATCC BAA-535 / M) GN=MMAR_2825 PE=4 SV=1	14	14	78.1	16.658	29.2969	25.9034	33.444	41.445	0.884171	0.77453	1.23924
mmpL2	3310	B2HRI9	>tr|B2HRI9|B2HRI9_MYCMM Conserved transmembrane transport protein, MmpL2 OS=Mycobacterium marinum (strain ATCC BAA-535 / M) GN=mmpL2 PE=4 SV=1	18	17	22.9	108.86	11.4428	13.9381	18.0023	18.0769	1.21807	0.774242	1.00415
pgsA1	2248	B2HM76	>tr|B2HM76|B2HM76_MYCMM Pi synthase PgsA1 OS=Mycobacterium marinum (strain ATCC BAA-535 / M) GN=pgsA1 PE=3 SV=1	4	4	15.8	24.77	10.9178	11.2962	14.5977	16.002	1.03466	0.773837	1.0962
MMAR_2637	3595	B2HSQ9	>tr|B2HSQ9|B2HSQ9_MYCMM Uncharacterized protein OS=Mycobacterium marinum (strain ATCC BAA-535 / M) GN=MMAR_2637 PE=4 SV=1	7	7	30.9	16.805	12.9488	19.1282	24.724	18.4893	1.47722	0.773668	0.747825
choD	78	B2HD25	>tr|B2HD25|B2HD25_MYCMM Cholesterol oxidase ChoD OS=Mycobacterium marinum (strain ATCC BAA-535 / M) GN=choD PE=4 SV=1	35	35	51.3	63.367	88.2664	85.1671	110.089	65.0508	0.964887	0.773619	0.590892
carA	2705	B2HP43	>tr|B2HP43|B2HP43_MYCMM Carbamoyl-phosphate synthase small chain OS=Mycobacterium marinum (strain ATCC BAA-535 / M) GN=carA PE=3 SV=1	11	11	33.1	39.828	15.4358	6.08271	7.86434	8.76682	0.394064	0.773454	1.11476
wbbL1	456	B2HEM7	>tr|B2HEM7|B2HEM7_MYCMM dTDP-rha:A-D-Glcnac-diphosphoryl polyprenol A-3-L-rhamnosyl transferase, WbbL1 OS=Mycobacterium marinum (strain ATCC BAA-535 / M) GN=wbbL1 PE=4 SV=1	12	12	51	32.658	25.2465	20.5023	26.5525	23.7477	0.812087	0.772145	0.894368
MMAR_3297	1149	B2HHM5	>tr|B2HHM5|B2HHM5_MYCMM Exported protease OS=Mycobacterium marinum (strain ATCC BAA-535 / M) GN=MMAR_3297 PE=4 SV=1	33	33	54.2	55.86	56.1066	48.4724	62.8504	57.2614	0.863933	0.771234	0.911075
MMAR_3471	1689	B2HJU8	>tr|B2HJU8|B2HJU8_MYCMM Uncharacterized protein OS=Mycobacterium marinum (strain ATCC BAA-535 / M) GN=MMAR_3471 PE=4 SV=1	10	10	52.1	15.571	8.44224	11.3666	14.7559	21.2276	1.34639	0.770304	1.43858
rplS	1646	B2HJL7	>sp|B2HJL7|RL19_MYCMM 50S ribosomal protein L19 OS=Mycobacterium marinum (strain ATCC BAA-535 / M) GN=rplS PE=3 SV=1	18	18	85.8	12.96	40.2147	34.0528	44.2151	42.7038	0.846774	0.770162	0.965821
MMAR_0368	2145	B2HLT6	>tr|B2HLT6|B2HLT6_MYCMM Peptide synthetase Nrp (Peptide synthase) OS=Mycobacterium marinum (strain ATCC BAA-535 / M) GN=MMAR_0368 PE=4 SV=1	91	91	30.1	346.94	71.4507	55.9636	72.6834	33.0469	0.783247	0.769963	0.454669
MMAR_1910	1915	B2HKT8	>tr|B2HKT8|B2HKT8_MYCMM Hydrolase OS=Mycobacterium marinum (strain ATCC BAA-535 / M) GN=MMAR_1910 PE=4 SV=1	15	15	35.3	62.472	19.8735	18.5764	24.1322	19.0762	0.934729	0.769776	0.79049
rpmJ	41	B2HCX0	>sp|B2HCX0|RL36_MYCMM 50S ribosomal protein L36 OS=Mycobacterium marinum (strain ATCC BAA-535 / M) GN=rpmJ PE=3 SV=1	5	5	64.9	4.3292	10.4158	8.29003	10.771	9.28829	0.795906	0.769661	0.862342
lgt	3162	B2HQY0	>tr|B2HQY0|B2HQY0_MYCMM Prolipoprotein diacylglyceryl transferase OS=Mycobacterium marinum (strain ATCC BAA-535 / M) GN=lgt PE=3 SV=1	7	7	13.2	74.549	11.3969	13.9616	18.149	12.3626	1.22503	0.769277	0.681171
MMAR_2031	2202	B2HM17	>tr|B2HM17|B2HM17_MYCMM Conserved protein OS=Mycobacterium marinum (strain ATCC BAA-535 / M) GN=MMAR_2031 PE=4 SV=1	13	13	53.7	15.825	15.3785	19.7504	25.6852	15.9801	1.28429	0.768939	0.622153
MMAR_1175	241	B2HDR7	>tr|B2HDR7|B2HDR7_MYCMM Oxidoreductase OS=Mycobacterium marinum (strain ATCC BAA-535 / M) GN=MMAR_1175 PE=4 SV=1	28	28	59.2	42.966	33.2326	38.5972	50.1982	40.7489	1.16143	0.768896	0.81176
rpsQ	3579	B2HSP0	>sp|B2HSP0|RS17_MYCMM 30S ribosomal protein S17 OS=Mycobacterium marinum (strain ATCC BAA-535 / M) GN=rpsQ PE=3 SV=1	20	20	87.4	13.068	45.1429	47.0514	61.233	68.2561	1.04228	0.768399	1.11469
rpsB	1657	B2HJN2	>tr|B2HJN2|B2HJN2_MYCMM 30S ribosomal protein S2 OS=Mycobacterium marinum (strain ATCC BAA-535 / M) GN=rpsB PE=3 SV=1	25	25	57.2	29.995	110.535	87.0696	113.482	119.694	0.787709	0.767253	1.05474
rplO	13	B2HCU0	>sp|B2HCU0|RL15_MYCMM 50S ribosomal protein L15 OS=Mycobacterium marinum (strain ATCC BAA-535 / M) GN=rplO PE=3 SV=1	15	15	75.3	15.622	32.7879	30.6354	39.9664	31.9275	0.934352	0.76653	0.79886
MMAR_3396	1461	B2HIR5	>tr|B2HIR5|B2HIR5_MYCMM Uncharacterized protein OS=Mycobacterium marinum (strain ATCC BAA-535 / M) GN=MMAR_3396 PE=4 SV=1	15	15	67.7	15.243	8.95571	10.8147	14.1113	6.15945	1.20758	0.766387	0.43649
mmpL3	2430	B2HMX4	>tr|B2HMX4|B2HMX4_MYCMM Conserved transmembrane transport protein MmpL3 OS=Mycobacterium marinum (strain ATCC BAA-535 / M) GN=mmpL3 PE=4 SV=1	48	48	46.5	102.06	124.614	129.577	169.09	125.343	1.03982	0.766318	0.74128
fadD14	3728	B2HT98	>tr|B2HT98|B2HT98_MYCMM Medium chain fatty-acid-CoA ligase FadD14 OS=Mycobacterium marinum (strain ATCC BAA-535 / M) GN=fadD14 PE=4 SV=1	16	16	30.4	59.387	9.93677	10.3567	13.5194	17.0558	1.04226	0.76606	1.26158
MMAR_1578	1060	B2HH98	>tr|B2HH98|B2HH98_MYCMM Uncharacterized protein OS=Mycobacterium marinum (strain ATCC BAA-535 / M) GN=MMAR_1578 PE=4 SV=1	2	2	22.3	15.145	5.45319	5.64811	7.37797	3.59574	1.03574	0.765537	0.487362
lppP	2002	B2HL78	>tr|B2HL78|B2HL78_MYCMM Lipoprotein LppP OS=Mycobacterium marinum (strain ATCC BAA-535 / M) GN=lppP PE=4 SV=1	5	5	34.7	18.005	5.43026	5.64811	7.37797	3.08518	1.04012	0.765537	0.418161
MMAR_2043	2212	B2HM28	>tr|B2HM28|B2HM28_MYCMM Conserved transmembrane protein OS=Mycobacterium marinum (strain ATCC BAA-535 / M) GN=MMAR_2043 PE=4 SV=1	11	11	21.1	49.906	17.3979	13.316	17.3988	20.6625	0.765376	0.765337	1.18758
MMAR_0059	1331	B2HIA4	>tr|B2HIA4|B2HIA4_MYCMM Transcriptional regulatory protein OS=Mycobacterium marinum (strain ATCC BAA-535 / M) GN=MMAR_0059 PE=4 SV=1	7	7	48.5	17.892	11.3969	7.78509	10.1791	6.70275	0.683088	0.76481	0.65848
MMAR_3523	1729	B2HK00	>tr|B2HK00|B2HK00_MYCMM Uncharacterized protein OS=Mycobacterium marinum (strain ATCC BAA-535 / M) GN=MMAR_3523 PE=4 SV=1	10	10	46.9	28.72	7.95171	10.3098	13.5194	13.3728	1.29655	0.762591	0.989152
mutT1	1397	B2HII4	>tr|B2HII4|B2HII4_MYCMM Hydrolase MutT1 OS=Mycobacterium marinum (strain ATCC BAA-535 / M) GN=mutT1 PE=3 SV=1	29	29	69.2	34.218	34.2251	45.9477	60.2719	85.1918	1.34251	0.762341	1.41346
lppR	2280	B2HMB8	>tr|B2HMB8|B2HMB8_MYCMM Conserved hypothetical lipoprotein, LppR OS=Mycobacterium marinum (strain ATCC BAA-535 / M) GN=lppR PE=4 SV=1	9	9	33.1	26.828	5.95518	5.16662	6.78608	6.17036	0.867583	0.761354	0.909267
MMAR_0216	1855	B2HKI0	>tr|B2HKI0|B2HKI0_MYCMM Glutamine-transport ATP-binding protein ABC transporter OS=Mycobacterium marinum (strain ATCC BAA-535 / M) GN=MMAR_0216 PE=4 SV=1	10	10	27.3	35.863	10.3929	16.3925	21.542	19.0981	1.57728	0.760954	0.886549
MMAR_1680	1356	B2HID6	>tr|B2HID6|B2HID6_MYCMM Dehydrogenase/reductase OS=Mycobacterium marinum (strain ATCC BAA-535 / M) GN=MMAR_1680 PE=4 SV=1	13	13	32.3	35.353	3.98159	5.60121	7.37797	14.4594	1.40678	0.759181	1.9598
MMAR_2294	2789	B2HPD9	>tr|B2HPD9|B2HPD9_MYCMM Conserved hypothetical secreted protein OS=Mycobacterium marinum (strain ATCC BAA-535 / M) GN=MMAR_2294 PE=4 SV=1	22	22	58.3	41.818	80.897	89.2535	117.573	97.0111	1.1033	0.759134	0.825115
MMAR_1290	469	B2HEP1	>tr|B2HEP1|B2HEP1_MYCMM Cationic amino acid transport integral membrane protein OS=Mycobacterium marinum (strain ATCC BAA-535 / M) GN=MMAR_1290 PE=4 SV=1	7	7	13.6	52.218	28.7719	34.6984	45.7154	34.068	1.20598	0.75901	0.74522
MMAR_5458	2625	B2HNR0	>tr|B2HNR0|B2HNR0_MYCMM Conserved hypothetical membrane protein OS=Mycobacterium marinum (strain ATCC BAA-535 / M) GN=MMAR_5458 PE=4 SV=1	26	26	45.6	50.877	66.4537	65.029	85.7461	63.9314	0.978561	0.758391	0.74559
MMAR_4623	431	B2HEK1	>tr|B2HEK1|B2HEK1_MYCMM Conserved hypothetical penicillin binding protein OS=Mycobacterium marinum (strain ATCC BAA-535 / M) GN=MMAR_4623 PE=4 SV=1	18	18	45.9	56.303	32.7879	22.2516	29.3536	31.4715	0.678653	0.758054	1.07215
sdhB_1	2468	B2HN35	>tr|B2HN35|B2HN35_MYCMM Succinate dehydrogenase (Iron-sulfur subunit), SdhB_1 OS=Mycobacterium marinum (strain ATCC BAA-535 / M) GN=sdhB_1 PE=4 SV=1	28	28	75.4	28.573	68.9522	79.0375	104.317	102.051	1.14626	0.757666	0.978279
MMAR_5097	1550	B2HJ38	>tr|B2HJ38|B2HJ38_MYCMM Conserved membrane protein OS=Mycobacterium marinum (strain ATCC BAA-535 / M) GN=MMAR_5097 PE=4 SV=1	5	5	17.9	27.789	18.8695	19.6566	25.9606	25.2684	1.04171	0.757171	0.973339
MMAR_2704	3635	B2HSX3	>tr|B2HSX3|B2HSX3_MYCMM Conserved protein OS=Mycobacterium marinum (strain ATCC BAA-535 / M) GN=MMAR_2704 PE=4 SV=1	9	9	56.8	17.231	6.43425	9.29991	12.2829	10.8091	1.44538	0.757143	0.880009
MMAR_1837	1669	B2HJQ0	>tr|B2HJQ0|B2HJQ0_MYCMM Conserved transmembrane protein OS=Mycobacterium marinum (strain ATCC BAA-535 / M) GN=MMAR_1837 PE=3 SV=1	12	12	29.7	42.772	24.8133	17.4727	23.1067	29.3747	0.704168	0.756176	1.27127
MMAR_1981	1963	B2HL10	>tr|B2HL10|B2HL10_MYCMM Conserved protein OS=Mycobacterium marinum (strain ATCC BAA-535 / M) GN=MMAR_1981 PE=4 SV=1	26	26	55.9	49.442	20.8202	19.6566	26.0133	21.1294	0.944111	0.755635	0.812252
MMAR_5131	1576	B2HJ72	>tr|B2HJ72|B2HJ72_MYCMM Glycosyl transferase OS=Mycobacterium marinum (strain ATCC BAA-535 / M) GN=MMAR_5131 PE=4 SV=1	13	13	59.7	25.306	24.3342	24.8232	32.8522	26.3005	1.0201	0.755603	0.80057
mce4A	1240	B2HHZ1	>tr|B2HHZ1|B2HHZ1_MYCMM MCE-family protein Mce4A OS=Mycobacterium marinum (strain ATCC BAA-535 / M) GN=mce4A PE=4 SV=1	13	13	29.8	42.643	18.8581	14.9715	19.8191	18.066	0.793902	0.755405	0.911545
narK3	2239	B2HM65	>tr|B2HM65|B2HM65_MYCMM Integral membrane nitrite extrusion protein NarK3 OS=Mycobacterium marinum (strain ATCC BAA-535 / M) GN=narK3 PE=4 SV=1	5	5	12.7	49.438	4.97412	4.63823	6.14145	10.3203	0.932473	0.755234	1.68044
MMAR_4632	590	B2HF73	>tr|B2HF73|B2HF73_MYCMM Uncharacterized protein OS=Mycobacterium marinum (strain ATCC BAA-535 / M) GN=MMAR_4632 PE=4 SV=1	32	32	48.6	60.586	36.1987	29.3911	38.9409	30.9501	0.811938	0.754762	0.794797
MMAR_0066	1338	B2HIB1	>tr|B2HIB1|B2HIB1_MYCMM Uncharacterized protein OS=Mycobacterium marinum (strain ATCC BAA-535 / M) GN=MMAR_0066 PE=4 SV=1	16	16	55	20.451	16.4054	14.49	19.2272	9.25555	0.883243	0.753617	0.481377
MMAR_3301	1153	B2HHM9	>tr|B2HHM9|B2HHM9_MYCMM Conserved protein OS=Mycobacterium marinum (strain ATCC BAA-535 / M) GN=MMAR_3301 PE=4 SV=1	24	24	55.5	57.69	34.2022	40.828	54.1832	64.0079	1.19372	0.753518	1.18132
guaB3	76	B2HD23	>tr|B2HD23|B2HD23_MYCMM Inosine-5-monophosphate (Imp) dehydrogenase, GuaB3 OS=Mycobacterium marinum (strain ATCC BAA-535 / M) GN=guaB3 PE=3 SV=1	16	16	30.4	39.043	13.382	7.13948	9.48174	15.4805	0.533515	0.752971	1.63266
mce3F_1	3027	B2HQH1	>tr|B2HQH1|B2HQH1_MYCMM MCE-family protein Mce3F_1 OS=Mycobacterium marinum (strain ATCC BAA-535 / M) GN=mce3F_1 PE=4 SV=1	15	15	35.1	52.082	16.3825	16.5332	21.9756	15.991	1.0092	0.752341	0.727671
dppA	1771	B2HK63	>tr|B2HK63|B2HK63_MYCMM Periplasmic dipeptide-binding lipoprotein DppA OS=Mycobacterium marinum (strain ATCC BAA-535 / M) GN=dppA PE=4 SV=1	11	11	27.3	58.396	6.94771	5.14317	6.83884	8.23443	0.740268	0.752053	1.20407
MMAR_0423	2411	B2HMV1	>tr|B2HMV1|B2HMV1_MYCMM Conserved transmembrane protein OS=Mycobacterium marinum (strain ATCC BAA-535 / M) GN=MMAR_0423 PE=4 SV=1	16	16	38.7	48.301	30.3352	21.9937	29.2481	30.9173	0.725022	0.75197	1.05707
MMAR_2628	3588	B2HSQ0	>tr|B2HSQ0|B2HSQ0_MYCMM Uncharacterized protein OS=Mycobacterium marinum (strain ATCC BAA-535 / M) GN=MMAR_2628 PE=4 SV=1	22	22	72.3	35.835	38.2067	30.4479	40.5582	39.2172	0.796925	0.750719	0.966936
MMAR_4363	3684	B2HT49	>tr|B2HT49|B2HT49_MYCMM Hypothetical carboxylesterase OS=Mycobacterium marinum (strain ATCC BAA-535 / M) GN=MMAR_4363 PE=4 SV=1	21	21	33.5	56.888	24.2769	25.2344	33.7194	37.1532	1.03944	0.748363	1.10183
MMAR_2237	2740	B2HP82	>tr|B2HP82|B2HP82_MYCMM Dehydrogenase OS=Mycobacterium marinum (strain ATCC BAA-535 / M) GN=MMAR_2237 PE=4 SV=1	10	10	25.4	50.209	7.44971	11.848	15.8342	10.3203	1.5904	0.748257	0.651775
tcrY	2076	B2HLI8	>tr|B2HLI8|B2HLI8_MYCMM Two-component sensor kinase TcrY OS=Mycobacterium marinum (strain ATCC BAA-535 / M) GN=tcrY PE=4 SV=1	18	18	39.3	53.721	23.3073	20.185	26.9861	22.1832	0.866037	0.747977	0.822026
MMAR_4980	1233	B2HHY4	>tr|B2HHY4|B2HHY4_MYCMM Conserved MCE-associated protein OS=Mycobacterium marinum (strain ATCC BAA-535 / M) GN=MMAR_4980 PE=4 SV=1	7	7	50	18.6	9.9597	7.20982	9.64	9.26646	0.723899	0.747906	0.961252
pknH	3269	B2HRD2	>tr|B2HRD2|B2HRD2_MYCMM Transmembrane serine/threonine-protein kinase H PknH OS=Mycobacterium marinum (strain ATCC BAA-535 / M) GN=pknH PE=3 SV=1	25	15	41.4	63.578	86.8522	88.6313	118.885	77.4134	1.02048	0.74552	0.651161
MMAR_5366	2344	B2HMK1	>tr|B2HMK1|B2HMK1_MYCMM Conserved secreted protein OS=Mycobacterium marinum (strain ATCC BAA-535 / M) GN=MMAR_5366 PE=4 SV=1	5	5	20.2	35.571	27.8138	30.3541	40.7165	42.3024	1.09133	0.745498	1.03895
MMAR_4965	1221	B2HHW9	>tr|B2HHW9|B2HHW9_MYCMM Conserved hypothetical membrane protein OS=Mycobacterium marinum (strain ATCC BAA-535 / M) GN=MMAR_4965 PE=4 SV=1	2	2	18.4	24.231	5.45319	4.61478	6.1942	6.1922	0.846255	0.745017	0.999676
putA_2	1075	B2HHC6	>tr|B2HHC6|B2HHC6_MYCMM Succinate-semialdehyde dehydrogenase [NADP+] dependent, PutA_2 OS=Mycobacterium marinum (strain ATCC BAA-535 / M) GN=putA_2 PE=3 SV=1	14	14	31.7	55.503	21.8242	18.5529	24.9351	18.0442	0.850107	0.74405	0.723647
fadD12	2736	B2HP78	>tr|B2HP78|B2HP78_MYCMM Long-chain-fatty-acid--CoA ligase FadD12 OS=Mycobacterium marinum (strain ATCC BAA-535 / M) GN=fadD12 PE=4 SV=1	20	20	48.2	58.69	25.8058	20.1146	27.0388	31.4606	0.779462	0.743916	1.16353
MMAR_3355	1191	B2HHT3	>tr|B2HHT3|B2HHT3_MYCMM Oxidoreductase OS=Mycobacterium marinum (strain ATCC BAA-535 / M) GN=MMAR_3355 PE=3 SV=1	23	23	59	33.621	37.6932	39.1725	52.6713	61.9001	1.03924	0.743716	1.17522
MMAR_0757	3090	B2HQP7	>tr|B2HQP7|B2HQP7_MYCMM Dehydrogenase/reductase OS=Mycobacterium marinum (strain ATCC BAA-535 / M) GN=MMAR_0757 PE=3 SV=1	13	13	49.4	33.263	41.2072	40.2058	54.1832	48.5055	0.975698	0.742035	0.895214
MMAR_3015	559	B2HF34	>tr|B2HF34|B2HF34_MYCMM Uncharacterized protein OS=Mycobacterium marinum (strain ATCC BAA-535 / M) GN=MMAR_3015 PE=4 SV=1	9	9	33.6	29.196	7.44971	6.75177	9.10087	7.7457	0.906313	0.741882	0.851095
MMAR_2743	97	B2HD48	>tr|B2HD48|B2HD48_MYCMM Short-chain type dehydrogenase OS=Mycobacterium marinum (strain ATCC BAA-535 / M) GN=MMAR_2743 PE=3 SV=1	13	13	42.1	30.158	13.9184	12.9283	17.4516	25.7244	0.928864	0.740807	1.47404
MMAR_2353	2947	B2HQ59	>tr|B2HQ59|B2HQ59_MYCMM UDP-glycosyltransferase OS=Mycobacterium marinum (strain ATCC BAA-535 / M) GN=MMAR_2353 PE=4 SV=1	12	12	31.2	44.582	17.8656	13.9147	18.7936	5.16016	0.778856	0.740395	0.27457
MMAR_2166	2532	B2HNB7	>tr|B2HNB7|B2HNB7_MYCMM Proline and glycine rich transmembrane protein OS=Mycobacterium marinum (strain ATCC BAA-535 / M) GN=MMAR_2166 PE=4 SV=1	5	5	16.2	38.421	18.3676	20.2084	27.3026	21.1621	1.10022	0.740165	0.775096
MMAR_2311	2909	B2HQ17	>tr|B2HQ17|B2HQ17_MYCMM Glycosyl transferase OS=Mycobacterium marinum (strain ATCC BAA-535 / M) GN=MMAR_2311 PE=4 SV=1	22	22	35.6	55.484	56.5513	50.4218	68.189	25.3339	0.891612	0.739442	0.371525
MMAR_2299	2793	B2HPE4	>tr|B2HPE4|B2HPE4_MYCMM Two-component regulator-sensor kinase OS=Mycobacterium marinum (strain ATCC BAA-535 / M) GN=MMAR_2299 PE=4 SV=1	19	19	45.5	52.346	19.8506	20.0677	27.1443	27.8867	1.01094	0.739297	1.02735
lprM_1	3026	B2HQH0	>tr|B2HQH0|B2HQH0_MYCMM MCE-family lipoprotein LprM_1 OS=Mycobacterium marinum (strain ATCC BAA-535 / M) GN=lprM_1 PE=4 SV=1	13	13	26.5	40.815	8.41931	10.3801	14.0585	10.3094	1.23289	0.73835	0.73332
MMAR_3353	1190	B2HHT1	>tr|B2HHT1|B2HHT1_MYCMM Conserved hypothetical membrane protein OS=Mycobacterium marinum (strain ATCC BAA-535 / M) GN=MMAR_3353 PE=4 SV=1	12	12	35.7	26.542	16.8845	19.68	26.658	23.7258	1.16557	0.738242	0.890009
MMAR_0421	2409	B2HMU9	>tr|B2HMU9|B2HMU9_MYCMM Conserved Mce associated membrane protein OS=Mycobacterium marinum (strain ATCC BAA-535 / M) GN=MMAR_0421 PE=4 SV=1	9	9	19	28.633	24.3457	18.3654	24.8823	21.6836	0.754358	0.738089	0.871446
pknD	410	B2HEF7	>tr|B2HEF7|B2HEF7_MYCMM Transmembrane serine/threonine-protein kinase D PknD OS=Mycobacterium marinum (strain ATCC BAA-535 / M) GN=pknD PE=3 SV=1	28	28	51.7	73.391	57.5782	69.9252	94.8469	67.6691	1.21444	0.737242	0.713456
mmpS4_2	3104	B2HQR2	>tr|B2HQR2|B2HQR2_MYCMM Conserved membrane protein MmpS4_2 OS=Mycobacterium marinum (strain ATCC BAA-535 / M) GN=mmpS4_2 PE=4 SV=1	8	8	30.9	15.245	8.41931	8.29003	11.2574	20.2283	0.984645	0.736408	1.79689
MMAR_2288	2784	B2HPD3	>sp|B2HPD3|Y2288_MYCMM UPF0353 protein MMAR_2288 OS=Mycobacterium marinum (strain ATCC BAA-535 / M) GN=MMAR_2288 PE=3 SV=1	11	11	26	35.922	56.0837	41.075	55.8533	49.5157	0.732388	0.735409	0.886532
mce4F	1235	B2HHY6	>tr|B2HHY6|B2HHY6_MYCMM MCE-family protein Mce4F OS=Mycobacterium marinum (strain ATCC BAA-535 / M) GN=mce4F PE=4 SV=1	15	15	26.4	59.021	15.869	17.5665	23.9096	15.9801	1.10697	0.734706	0.668357
mycP3	2667	B2HNX2	>tr|B2HNX2|B2HNX2_MYCMM Membrane-anchored mycosin MycP3 OS=Mycobacterium marinum (strain ATCC BAA-535 / M) GN=mycP3 PE=4 SV=1	9	9	42.4	47.385	22.8397	18.5764	25.3159	18.0769	0.813338	0.733782	0.714054
malQ	3612	B2HST2	>tr|B2HST2|B2HST2_MYCMM 4-alpha-glucanotransferase MalQ OS=Mycobacterium marinum (strain ATCC BAA-535 / M) GN=malQ PE=4 SV=1	15	15	21	80.417	6.45718	7.23326	9.8626	7.73479	1.12019	0.733403	0.784254
MMAR_1991	2165	B2HLX7	>tr|B2HLX7|B2HLX7_MYCMM Conserved transmembrane alanine and glycine rich protein OS=Mycobacterium marinum (strain ATCC BAA-535 / M) GN=MMAR_1991 PE=4 SV=1	29	29	48.4	80.615	122.618	134.907	183.951	135.164	1.10023	0.733386	0.734779
MMAR_0240	1868	B2HKK4	>tr|B2HKK4|B2HKK4_MYCMM Monoooxygenase OS=Mycobacterium marinum (strain ATCC BAA-535 / M) GN=MMAR_0240 PE=4 SV=1	16	16	36.7	61.816	12.9144	10.3098	14.0585	8.24535	0.798319	0.733346	0.586501
MMAR_0012	1295	B2HI57	>tr|B2HI57|B2HI57_MYCMM Conserved hypothetical membrane protein OS=Mycobacterium marinum (strain ATCC BAA-535 / M) GN=MMAR_0012 PE=4 SV=1	3	3	15.6	15.2	6.44572	6.19994	8.45623	6.18128	0.96187	0.73318	0.730974
lppV_1	1917	B2HKU2	>tr|B2HKU2|B2HKU2_MYCMM Conserved lipoprotein LppV_1 OS=Mycobacterium marinum (strain ATCC BAA-535 / M) GN=lppV_1 PE=4 SV=1	8	8	45.8	20.135	11.8989	10.3801	14.1641	14.4485	0.87236	0.73285	1.02008
MMAR_0234	1865	B2HKJ8	>tr|B2HKJ8|B2HKJ8_MYCMM Uncharacterized protein OS=Mycobacterium marinum (strain ATCC BAA-535 / M) GN=MMAR_0234 PE=4 SV=1	15	15	62	18.159	22.8282	26.0207	35.5478	46.627	1.13985	0.73199	1.31167
MMAR_0947	3498	B2HSE6	>tr|B2HSE6|B2HSE6_MYCMM Conserved hypothetical membrane protein OS=Mycobacterium marinum (strain ATCC BAA-535 / M) GN=MMAR_0947 PE=4 SV=1	15	15	40.1	53.624	15.9034	19.0579	26.0661	23.7149	1.19835	0.731136	0.9098
MMAR_4384	3702	B2HT70	>tr|B2HT70|B2HT70_MYCMM Conserved protein OS=Mycobacterium marinum (strain ATCC BAA-535 / M) GN=MMAR_4384 PE=4 SV=1	5	5	39.4	10.449	14.865	14.5134	19.8719	16.578	0.976346	0.73035	0.834245
MMAR_0876	3332	B2HRM1	>tr|B2HRM1|B2HRM1_MYCMM Uncharacterized protein OS=Mycobacterium marinum (strain ATCC BAA-535 / M) GN=MMAR_0876 PE=4 SV=1	23	23	52.1	47.045	53.5623	53.0403	72.713	74.2736	0.990255	0.729447	1.02146
MMAR_2931	356	B2HE90	>tr|B2HE90|B2HE90_MYCMM Ferredoxin reductase OS=Mycobacterium marinum (strain ATCC BAA-535 / M) GN=MMAR_2931 PE=4 SV=1	14	14	35.5	50.397	6.45718	5.695	7.81159	9.29921	0.881964	0.729045	1.19044
MMAR_0668	2858	B2HPV2	>tr|B2HPV2|B2HPV2_MYCMM Conserved transmembrane protein OS=Mycobacterium marinum (strain ATCC BAA-535 / M) GN=MMAR_0668 PE=4 SV=1	8	8	17.4	25.008	24.7789	23.1443	31.7739	30.9501	0.934032	0.728405	0.974072
MMAR_1758	1421	B2HIL3	>tr|B2HIL3|B2HIL3_MYCMM Ketoreductase OS=Mycobacterium marinum (strain ATCC BAA-535 / M) GN=MMAR_1758 PE=4 SV=1	31	31	66	41.876	76.3446	64.7946	89.022	70.1018	0.848712	0.727849	0.787466
MMAR_0103	1593	B2HJA5	>tr|B2HJA5|B2HJA5_MYCMM Uncharacterized protein OS=Mycobacterium marinum (strain ATCC BAA-535 / M) GN=MMAR_0103 PE=4 SV=1	13	13	33.6	38.299	17.3979	20.643	28.3809	19.6195	1.18652	0.727357	0.691295
MMAR_0512	2470	B2HN37	>tr|B2HN37|B2HN37_MYCMM Succinate dehydrogenase (Membrane anchor subunit) OS=Mycobacterium marinum (strain ATCC BAA-535 / M) GN=MMAR_0512 PE=4 SV=1	5	5	18.3	31.258	18.8466	15.9813	21.9756	24.7906	0.847969	0.72723	1.1281
MMAR_1311	484	B2HER2	>tr|B2HER2|B2HER2_MYCMM Uncharacterized protein OS=Mycobacterium marinum (strain ATCC BAA-535 / M) GN=MMAR_1311 PE=4 SV=1	15	15	40	51.425	21.3681	25.8331	35.5478	29.3966	1.20896	0.726714	0.826958
MMAR_0549	2666	B2HNX1	>tr|B2HNX1|B2HNX1_MYCMM Conserved transmembrane protein OS=Mycobacterium marinum (strain ATCC BAA-535 / M) GN=MMAR_0549 PE=4 SV=1	8	8	12.9	47.838	18.3676	18.6233	25.6325	20.6516	1.01392	0.72655	0.80568
subI	2277	B2HMB4	>tr|B2HMB4|B2HMB4_MYCMM Sulfate-binding lipoprotein SubI OS=Mycobacterium marinum (strain ATCC BAA-535 / M) GN=subI PE=4 SV=1	7	7	23.8	37.277	7.44971	7.3036	10.0736	5.68164	0.980387	0.725023	0.564012
MMAR_3263	1124	B2HHJ2	>tr|B2HHJ2|B2HHJ2_MYCMM ATP-binding protein ABC transporter OS=Mycobacterium marinum (strain ATCC BAA-535 / M) GN=MMAR_3263 PE=3 SV=1	27	27	60.7	34.665	30.2779	24.9764	34.4696	22.7156	0.824906	0.724594	0.659006
MMAR_4284	3476	B2HSB4	>tr|B2HSB4|B2HSB4_MYCMM Transcriptional regulatory protein OS=Mycobacterium marinum (strain ATCC BAA-535 / M) GN=MMAR_4284 PE=4 SV=1	15	15	67.6	22.804	29.2969	24.8232	34.2585	25.7353	0.847299	0.724584	0.751209
lprA	3266	B2HRC8	>tr|B2HRC8|B2HRC8_MYCMM Lipoprotein LprA OS=Mycobacterium marinum (strain ATCC BAA-535 / M) GN=lprA PE=4 SV=1	10	10	52.8	24.985	30.7341	40.2762	55.5895	44.877	1.31047	0.724528	0.807293
MMAR_3229	948	B2HGV2	>tr|B2HGV2|B2HGV2_MYCMM Conserved protein OS=Mycobacterium marinum (strain ATCC BAA-535 / M) GN=MMAR_3229 PE=4 SV=1	9	9	38.9	16.207	9.42331	9.80485	13.5722	16.002	1.04049	0.722423	1.17903
MMAR_4855	985	B2HH04	>tr|B2HH04|B2HH04_MYCMM Uncharacterized protein OS=Mycobacterium marinum (strain ATCC BAA-535 / M) GN=MMAR_4855 PE=4 SV=1	6	6	27.7	23.535	8.92131	6.17649	8.56174	9.26646	0.69233	0.721406	1.08231
MMAR_1406	686	B2HFM0	>tr|B2HFM0|B2HFM0_MYCMM Uncharacterized protein OS=Mycobacterium marinum (strain ATCC BAA-535 / M) GN=MMAR_1406 PE=4 SV=1	4	4	19.5	21.692	5.95518	5.695	7.9171	10.3203	0.95631	0.719329	1.30355
pstC2	412	B2HEF9	>tr|B2HEF9|B2HEF9_MYCMM Phosphate-transport integral membrane ABC transporter PstC2 OS=Mycobacterium marinum (strain ATCC BAA-535 / M) GN=pstC2 PE=3 SV=1	7	7	26.9	34.238	7.44971	7.7382	10.771	8.76682	1.03872	0.718428	0.813927
choD_1	2586	B2HNI1	>tr|B2HNI1|B2HNI1_MYCMM Cholesterol oxidase ChoD_1 OS=Mycobacterium marinum (strain ATCC BAA-535 / M) GN=choD_1 PE=4 SV=1	19	19	33.9	62.579	12.4353	7.23326	10.0736	9.79885	0.581672	0.71804	0.972724
MMAR_3032	572	B2HF51	>tr|B2HF51|B2HF51_MYCMM Uncharacterized protein OS=Mycobacterium marinum (strain ATCC BAA-535 / M) GN=MMAR_3032 PE=4 SV=1	16	16	51.9	27.476	21.3681	23.743	33.0748	22.6501	1.11114	0.717858	0.684816
cyp138A3	2126	B2HLR4	>tr|B2HLR4|B2HLR4_MYCMM Cytochrome P450 138A3 Cyp138A3 OS=Mycobacterium marinum (strain ATCC BAA-535 / M) GN=cyp138A3 PE=3 SV=1	18	17	36.3	49.636	20.8546	16.5566	23.1067	19.5977	0.793907	0.71653	0.848141
arsB1	2200	B2HM15	>tr|B2HM15|B2HM15_MYCMM Arsenic-transport integral membrane protein ArsB1 OS=Mycobacterium marinum (strain ATCC BAA-535 / M) GN=arsB1 PE=4 SV=1	2	2	4.9	45.5	9.93677	7.20982	10.0736	6.70275	0.725569	0.715713	0.665377
embR	3268	B2HRD1	>tr|B2HRD1|B2HRD1_MYCMM Transcriptional regulatory protein EmbR OS=Mycobacterium marinum (strain ATCC BAA-535 / M) GN=embR PE=4 SV=1	19	18	50.5	42.084	11.4198	5.62466	7.86434	9.78794	0.492534	0.71521	1.2446
MMAR_4303	3487	B2HSD1	>tr|B2HSD1|B2HSD1_MYCMM Uncharacterized protein OS=Mycobacterium marinum (strain ATCC BAA-535 / M) GN=MMAR_4303 PE=4 SV=1	7	7	24.1	23.351	12.4009	14.5134	20.3055	15.9583	1.17035	0.714753	0.78591
MMAR_3368	1444	B2HIN7	>tr|B2HIN7|B2HIN7_MYCMM Conserved transmembrane protein OS=Mycobacterium marinum (strain ATCC BAA-535 / M) GN=MMAR_3368 PE=4 SV=1	4	4	26.4	13.316	6.94771	7.23326	10.1264	10.3422	1.0411	0.714299	1.02131
MMAR_4949	1207	B2HHV3	>tr|B2HHV3|B2HHV3_MYCMM Xanthine/uracil permease OS=Mycobacterium marinum (strain ATCC BAA-535 / M) GN=MMAR_4949 PE=4 SV=1	10	10	16.3	67.342	10.9408	10.3098	14.4394	13.4055	0.942327	0.714003	0.928397
MMAR_0569	2683	B2HNZ1	>tr|B2HNZ1|B2HNZ1_MYCMM Conserved hypothetical transmembrane protein OS=Mycobacterium marinum (strain ATCC BAA-535 / M) GN=MMAR_0569 PE=4 SV=1	11	11	21.1	52.859	9.41184	5.64811	7.9171	5.68164	0.600106	0.713406	0.717641
mce3B_1	3023	B2HQG7	>tr|B2HQG7|B2HQG7_MYCMM MCE-family protein Mce3B_1 OS=Mycobacterium marinum (strain ATCC BAA-535 / M) GN=mce3B_1 PE=4 SV=1	9	9	23	36.821	12.4009	12.3999	17.3988	11.8738	0.999917	0.712684	0.68245
MMAR_1931	1932	B2HKV9	>tr|B2HKV9|B2HKV9_MYCMM Uncharacterized protein OS=Mycobacterium marinum (strain ATCC BAA-535 / M) GN=MMAR_1931 PE=4 SV=1	7	7	28.2	34.706	5.95518	4.06295	5.70782	4.12813	0.682255	0.711822	0.723241
MMAR_3435	1486	B2HIV3	>tr|B2HIV3|B2HIV3_MYCMM Conserved hypothetical membrane protein OS=Mycobacterium marinum (strain ATCC BAA-535 / M) GN=MMAR_3435 PE=4 SV=1	3	3	24.7	15.742	6.45718	5.21351	7.32521	6.71367	0.807397	0.711721	0.916515
MMAR_0110	1599	B2HJB2	>tr|B2HJB2|B2HJB2_MYCMM Oxidoreductase OS=Mycobacterium marinum (strain ATCC BAA-535 / M) GN=MMAR_0110 PE=4 SV=1	8	8	26.3	49.011	6.44572	7.23326	10.1791	4.11721	1.12218	0.710597	0.404476
lprK	2404	B2HMU4	>tr|B2HMU4|B2HMU4_MYCMM MCE-family lipoprotein LprK (MCE-family lipoprotein Mce1E) OS=Mycobacterium marinum (strain ATCC BAA-535 / M) GN=lprK PE=4 SV=1	23	23	57.4	43.805	100.291	108.91	153.267	86.0492	1.08594	0.71059	0.561433
MMAR_4175	3280	B2HRF1	>tr|B2HRF1|B2HRF1_MYCMM Conserved hypothetical membrane protein OS=Mycobacterium marinum (strain ATCC BAA-535 / M) GN=MMAR_4175 PE=4 SV=1	9	9	58.2	18.854	7.95171	10.3801	14.6504	11.3633	1.3054	0.70852	0.775627
mce1A	2400	B2HMU0	>tr|B2HMU0|B2HMU0_MYCMM MCE-family protein Mce1A OS=Mycobacterium marinum (strain ATCC BAA-535 / M) GN=mce1A PE=4 SV=1	20	20	44.9	46.549	78.9807	68.4698	96.6753	60.8899	0.866918	0.708245	0.629839
MMAR_1734	1401	B2HII9	>tr|B2HII9|B2HII9_MYCMM Conserved hypothetical membrane protein OS=Mycobacterium marinum (strain ATCC BAA-535 / M) GN=MMAR_1734 PE=4 SV=1	5	5	51.4	21.467	7.92878	8.77152	12.3884	9.78794	1.10629	0.708043	0.790089
MMAR_3431	1483	B2HIU9	>tr|B2HIU9|B2HIU9_MYCMM Uncharacterized protein OS=Mycobacterium marinum (strain ATCC BAA-535 / M) GN=MMAR_3431 PE=4 SV=1	16	15	36.1	47.846	26.8442	27.3713	38.7826	20.1192	1.01964	0.705763	0.518768
MMAR_2711	3642	B2HSY0	>tr|B2HSY0|B2HSY0_MYCMM Hydrolase OS=Mycobacterium marinum (strain ATCC BAA-535 / M) GN=MMAR_2711 PE=4 SV=1	11	11	43.8	31.603	9.89091	10.2629	14.5449	7.19148	1.03761	0.7056	0.494432
MMAR_3994	2827	B2HPQ0	>tr|B2HPQ0|B2HPQ0_MYCMM Conserved hypothetical alanine-rich protein OS=Mycobacterium marinum (strain ATCC BAA-535 / M) GN=MMAR_3994 PE=4 SV=1	17	16	63.1	30.344	61.6172	68.7746	97.4782	68.6575	1.11616	0.705538	0.704336
MMAR_0715	2893	B2HPZ7	>tr|B2HPZ7|B2HPZ7_MYCMM Conserved hypothetical membrane protein OS=Mycobacterium marinum (strain ATCC BAA-535 / M) GN=MMAR_0715 PE=4 SV=1	11	11	31	47.454	23.3302	22.6862	32.2075	28.3318	0.972397	0.704376	0.879663
MMAR_4415	154	B2HDD8	>tr|B2HDD8|B2HDD8_MYCMM Uncharacterized protein OS=Mycobacterium marinum (strain ATCC BAA-535 / M) GN=MMAR_4415 PE=4 SV=1	11	11	38.2	18.843	8.44224	8.79497	12.4939	6.69184	1.04178	0.703941	0.535608
MMAR_4171	3276	B2HRE7	>tr|B2HRE7|B2HRE7_MYCMM Transmembrane serine/threonine-protein kinase OS=Mycobacterium marinum (strain ATCC BAA-535 / M) GN=MMAR_4171 PE=3 SV=1	27	21	40.2	70.267	59.9965	68.3166	97.109	92.4597	1.13868	0.703504	0.952123
MMAR_0917	3368	B2HRR2	>tr|B2HRR2|B2HRR2_MYCMM Flavin-binding monooxygenase OS=Mycobacterium marinum (strain ATCC BAA-535 / M) GN=MMAR_0917 PE=4 SV=1	16	16	36.7	56.089	12.4238	15.0418	21.3838	18.5766	1.21072	0.703422	0.868724
MMAR_4141	3258	B2HRB7	>tr|B2HRB7|B2HRB7_MYCMM Dehydrogenase fad flavoprotein Gmc oxidoreductase OS=Mycobacterium marinum (strain ATCC BAA-535 / M) GN=MMAR_4141 PE=3 SV=1	19	19	40.6	56.926	22.8511	21.1245	30.051	20.6516	0.92444	0.702955	0.687217
MMAR_2800	137	B2HDA5	>tr|B2HDA5|B2HDA5_MYCMM Stage II sporulation protein OS=Mycobacterium marinum (strain ATCC BAA-535 / M) GN=MMAR_2800 PE=3 SV=1	6	6	33.6	15.378	9.92531	10.8147	15.4006	13.4164	1.08961	0.702228	0.871164
cspB	614	B2HFA2	>tr|B2HFA2|B2HFA2_MYCMM Cold shock-like protein B CspB OS=Mycobacterium marinum (strain ATCC BAA-535 / M) GN=cspB PE=3 SV=1	9	9	50	14.87	8.90985	8.77152	12.4939	14.4921	0.984475	0.702064	1.15993
MMAR_0948	3499	B2HSE7	>tr|B2HSE7|B2HSE7_MYCMM Uncharacterized protein OS=Mycobacterium marinum (strain ATCC BAA-535 / M) GN=MMAR_0948 PE=4 SV=1	7	7	47.2	17.664	8.93278	11.4134	16.2678	8.25626	1.2777	0.701597	0.507521
MMAR_1304	479	B2HEQ5	>tr|B2HEQ5|B2HEQ5_MYCMM Conserved protein OS=Mycobacterium marinum (strain ATCC BAA-535 / M) GN=MMAR_1304 PE=4 SV=1	19	19	68.1	26.182	30.2665	25.1406	35.8759	57.7611	0.830641	0.700764	1.61002
atpF	3055	B2HQK6	>sp|B2HQK6|ATPF_MYCMM ATP synthase subunit b OS=Mycobacterium marinum (strain ATCC BAA-535 / M) GN=atpF PE=3 SV=1	20	20	61.8	18.131	95.8652	87.3275	124.804	98.7283	0.910941	0.699717	0.791067
rpsI	53	B2HCZ1	>sp|B2HCZ1|RS9_MYCMM 30S ribosomal protein S9 OS=Mycobacterium marinum (strain ATCC BAA-535 / M) GN=rpsI PE=3 SV=1	13	13	49.3	16.86	18.3217	19.6566	28.1171	37.6856	1.07286	0.699097	1.34031
MMAR_4416	155	B2HDD9	>tr|B2HDD9|B2HDD9_MYCMM Conserved hypothetical secreted protein OS=Mycobacterium marinum (strain ATCC BAA-535 / M) GN=MMAR_4416 PE=4 SV=1	17	17	34.3	54.751	24.3686	23.6726	33.8777	31.9712	0.971441	0.698768	0.943724
lprL	2956	B2HQ70	>tr|B2HQ70|B2HQ70_MYCMM Lipoprotein, LprL OS=Mycobacterium marinum (strain ATCC BAA-535 / M) GN=lprL PE=4 SV=1	12	12	55.5	22.893	29.2625	31.9861	45.7797	39.1954	1.09308	0.698697	0.856175
MMAR_3063	718	B2HFT4	>tr|B2HFT4|B2HFT4_MYCMM Conserved hypothetical membrane protein OS=Mycobacterium marinum (strain ATCC BAA-535 / M) GN=MMAR_3063 PE=4 SV=1	6	6	35.6	18.195	13.382	10.3098	14.7559	11.8193	0.770424	0.698687	0.800983
pyrD	764	B2HFZ1	>sp|B2HFZ1|PYRD_MYCMM Dihydroorotate dehydrogenase (quinone) OS=Mycobacterium marinum (strain ATCC BAA-535 / M) GN=pyrD PE=3 SV=1	13	13	31.9	37.877	22.7938	18.9875	27.1971	16.4907	0.833012	0.698145	0.60634
mce3C_1	3024	B2HQG8	>tr|B2HQG8|B2HQG8_MYCMM MCE-family protein, Mce3C_1 OS=Mycobacterium marinum (strain ATCC BAA-535 / M) GN=mce3C_1 PE=4 SV=1	15	15	29.2	46.369	22.8511	23.7195	34.0359	23.7695	1.038	0.696897	0.698365
MMAR_1755	1418	B2HIL0	>tr|B2HIL0|B2HIL0_MYCMM Glycosyl transferase OS=Mycobacterium marinum (strain ATCC BAA-535 / M) GN=MMAR_1755 PE=4 SV=1	18	18	33.6	46.267	39.621	46.9107	67.3745	52.134	1.18399	0.696268	0.773795
MMAR_1308	483	B2HEQ9	>tr|B2HEQ9|B2HEQ9_MYCMM Conserved protein OS=Mycobacterium marinum (strain ATCC BAA-535 / M) GN=MMAR_1308 PE=4 SV=1	7	7	47.5	17.251	5.47612	5.16662	7.43072	8.76682	0.943482	0.695305	1.17981
MMAR_4406	3723	B2HT92	>tr|B2HT92|B2HT92_MYCMM Uncharacterized protein OS=Mycobacterium marinum (strain ATCC BAA-535 / M) GN=MMAR_4406 PE=4 SV=1	6	6	28.7	17.145	8.44224	9.32335	13.4139	11.2869	1.10437	0.695051	0.84143
pra	3707	B2HT75	>tr|B2HT75|B2HT75_MYCMM Proline-rich antigen, Pra OS=Mycobacterium marinum (strain ATCC BAA-535 / M) GN=pra PE=4 SV=1	4	4	16.1	27.648	9.40038	9.73451	14.0058	14.4048	1.03554	0.695034	1.02849
lppE	117	B2HD74	>tr|B2HD74|B2HD74_MYCMM Conserved lipoprotein LppE OS=Mycobacterium marinum (strain ATCC BAA-535 / M) GN=lppE PE=4 SV=1	6	6	38.6	14.702	5.41879	4.63823	6.68058	3.08518	0.855953	0.694286	0.461814
MMAR_1880	1685	B2HJU3	>tr|B2HJU3|B2HJU3_MYCMM Uncharacterized protein OS=Mycobacterium marinum (strain ATCC BAA-535 / M) GN=MMAR_1880 PE=4 SV=1	12	12	34.4	37.046	12.4009	8.14935	11.7438	10.3094	0.657158	0.69393	0.877863
dsbF	1518	B2HIZ8	>tr|B2HIZ8|B2HIZ8_MYCMM Conserved lipoprotein DsbF OS=Mycobacterium marinum (strain ATCC BAA-535 / M) GN=dsbF PE=4 SV=1	7	7	46.4	18.605	34.3054	37.7749	54.4585	50.2228	1.10114	0.693645	0.922221
ppm1_2	1548	B2HJ34	>tr|B2HJ34|B2HJ34_MYCMM Polyprenol-monophosphomannose synthase Ppm1_2 OS=Mycobacterium marinum (strain ATCC BAA-535 / M) GN=ppm1_2 PE=4 SV=1	11	9	29.7	35.246	19.3028	11.7543	16.9652	13.4055	0.608942	0.692845	0.790176
ponA1	1341	B2HIB4	>tr|B2HIB4|B2HIB4_MYCMM Bifunctional penicillin-binding protein 1A/1B PonA1 OS=Mycobacterium marinum (strain ATCC BAA-535 / M) GN=ponA1 PE=4 SV=1	29	29	51.9	72.477	71.9757	81.656	117.878	93.4153	1.13449	0.692718	0.792477
purM	1007	B2HH29	>tr|B2HH29|B2HH29_MYCMM Phosphoribosylformylglycinamidine cyclo-ligase OS=Mycobacterium marinum (strain ATCC BAA-535 / M) GN=purM PE=3 SV=1	13	13	41.4	38.664	12.8914	5.55432	8.02261	14.4157	0.430854	0.692334	1.79689
MMAR_2350	2945	B2HQ56	>tr|B2HQ56|B2HQ56_MYCMM Methylase OS=Mycobacterium marinum (strain ATCC BAA-535 / M) GN=MMAR_2350 PE=4 SV=1	22	22	78	24.767	65.9746	69.2795	100.121	46.9084	1.05009	0.691957	0.468516
rnpA	2642	B2HNT8	>sp|B2HNT8|RNPA_MYCMM Ribonuclease P protein component OS=Mycobacterium marinum (strain ATCC BAA-535 / M) GN=rnpA PE=3 SV=1	7	7	46.7	13.557	7.43825	6.22339	8.99536	5.65981	0.836674	0.691844	0.629192
MMAR_4507	213	B2HDM9	>tr|B2HDM9|B2HDM9_MYCMM Uncharacterized protein OS=Mycobacterium marinum (strain ATCC BAA-535 / M) GN=MMAR_4507 PE=4 SV=1	12	12	35.4	36.375	7.43825	6.65798	9.64	8.25626	0.895101	0.690662	0.856459
MMAR_2338	2934	B2HQ44	>tr|B2HQ44|B2HQ44_MYCMM Hypothetical transmembrane protein OS=Mycobacterium marinum (strain ATCC BAA-535 / M) GN=MMAR_2338 PE=4 SV=1	8	8	18.4	57.775	13.4049	14.4431	20.9501	9.25555	1.07745	0.689402	0.441789
MMAR_4126	3245	B2HRA2	>tr|B2HRA2|B2HRA2_MYCMM Conserved hypothetical transport protein OS=Mycobacterium marinum (strain ATCC BAA-535 / M) GN=MMAR_4126 PE=4 SV=1	21	21	32.8	63.219	15.4014	19.1282	27.789	31.4934	1.24198	0.688338	1.1333
idsA2	937	B2HGT1	>tr|B2HGT1|B2HGT1_MYCMM Geranylgeranyl pyrophosphate synthetase IdsA2 OS=Mycobacterium marinum (strain ATCC BAA-535 / M) GN=idsA2 PE=3 SV=1	10	10	25	36.413	5.98958	3.07652	4.4713	4.6496	0.513646	0.68806	1.03988
MMAR_1179	245	B2HDS1	>tr|B2HDS1|B2HDS1_MYCMM Oxidoreductase OS=Mycobacterium marinum (strain ATCC BAA-535 / M) GN=MMAR_1179 PE=4 SV=1	11	11	31.5	48.493	17.3865	14.4431	21.0029	13.927	0.830707	0.687671	0.663098
MMAR_2734	90	B2HD39	>tr|B2HD39|B2HD39_MYCMM Uncharacterized protein OS=Mycobacterium marinum (strain ATCC BAA-535 / M) GN=MMAR_2734 PE=4 SV=1	14	14	30.5	52.977	9.42331	9.32335	13.5722	9.82068	0.989393	0.686947	0.72359
ansP1_1	2831	B2HPR1	>tr|B2HPR1|B2HPR1_MYCMM L-asparagine permease AnsP1_1 OS=Mycobacterium marinum (strain ATCC BAA-535 / M) GN=ansP1_1 PE=4 SV=1	7	7	13.9	51.222	12.8914	12.4468	18.149	13.9488	0.965507	0.685811	0.768573
yrbE3A_1	3020	B2HQG4;B2HE40	>tr|B2HQG4|B2HQG4_MYCMM Conserved hypothetical integral membrane protein YrbE3A_1 OS=Mycobacterium marinum (strain ATCC BAA-535 / M) GN=yrbE3A_1 PE=4 SV=1	2	2	8.2	26.216	5.95518	6.15305	8.99536	8.7559	1.03323	0.684024	0.97338
MMAR_2337	2933	B2HQ43	>tr|B2HQ43|B2HQ43_MYCMM Conserved hypothetical membrane protein OS=Mycobacterium marinum (strain ATCC BAA-535 / M) GN=MMAR_2337 PE=4 SV=1	3	3	19.9	18.261	5.45319	6.22339	9.10087	3.60666	1.14124	0.683823	0.396298
blaC	711	B2HFS3	>tr|B2HFS3|B2HFS3_MYCMM Class a beta-lactamase, BlaC OS=Mycobacterium marinum (strain ATCC BAA-535 / M) GN=blaC PE=4 SV=1	15	15	50.8	33.31	19.3486	19.7035	28.92	19.5322	1.01834	0.68131	0.675388
MMAR_3855	2607	B2HNL3	>tr|B2HNL3|B2HNL3_MYCMM Conserved integral membrane leucine and alanine rich protein OS=Mycobacterium marinum (strain ATCC BAA-535 / M) GN=MMAR_3855 PE=4 SV=1	3	3	7.5	46.051	5.46465	6.19994	9.10087	8.76682	1.13455	0.681247	0.963295
MMAR_0461	2437	B2HMY7	>tr|B2HMY7|B2HMY7_MYCMM Conserved hypothetical transmembrane protein OS=Mycobacterium marinum (strain ATCC BAA-535 / M) GN=MMAR_0461 PE=4 SV=1	10	10	26.6	48.378	8.93278	11.4134	16.7542	7.23514	1.2777	0.681229	0.431841
MMAR_2478	3212	B2HR42	>tr|B2HR42|B2HR42_MYCMM Long-chain acyl-CoA synthase OS=Mycobacterium marinum (strain ATCC BAA-535 / M) GN=MMAR_2478 PE=4 SV=1	41	41	39.3	107.12	95.8193	92.5645	135.88	104.79	0.966031	0.681222	0.771192
bfrA	111	B2HD66	>tr|B2HD66|B2HD66_MYCMM Bacterioferritin OS=Mycobacterium marinum (strain ATCC BAA-535 / M) GN=bfrA PE=3 SV=1	10	10	69.8	18.303	30.2206	31.5515	46.3188	24.2364	1.04404	0.681181	0.523251
MMAR_2334	2930	B2HQ40	>tr|B2HQ40|B2HQ40_MYCMM Nucleotidyltransferase OS=Mycobacterium marinum (strain ATCC BAA-535 / M) GN=MMAR_2334 PE=4 SV=1	4	4	23.7	28.177	10.8949	10.3332	15.1896	9.79885	0.948446	0.680285	0.645104
MMAR_4781	799	B2HG73	>tr|B2HG73|B2HG73_MYCMM Two-component sensor kinase OS=Mycobacterium marinum (strain ATCC BAA-535 / M) GN=MMAR_4781 PE=4 SV=1	9	9	20.2	43.78	9.87945	7.69131	11.3101	14.9044	0.778516	0.680036	1.31779
rpsL	3556	B2HSL0	>sp|B2HSL0|RS12_MYCMM 30S ribosomal protein S12 OS=Mycobacterium marinum (strain ATCC BAA-535 / M) GN=rpsL PE=3 SV=1	20	20	75	13.849	53.1291	60.9426	89.8481	90.5048	1.14707	0.678285	1.00731
glnH	2892	B2HPZ6	>tr|B2HPZ6|B2HPZ6_MYCMM Glutamine-binding lipoprotein GlnH OS=Mycobacterium marinum (strain ATCC BAA-535 / M) GN=glnH PE=4 SV=1	12	12	29.6	35.654	23.8207	26.2911	38.8353	29.3856	1.10371	0.67699	0.756673
MMAR_1636	1094	B2HHF4	>tr|B2HHF4|B2HHF4_MYCMM Short chain alcohol dehydrogenase/reductase OS=Mycobacterium marinum (strain ATCC BAA-535 / M) GN=MMAR_1636 PE=3 SV=1	17	17	40.2	31.518	17.3865	14.9011	22.0284	18.5984	0.857052	0.676451	0.844293
lppF	3500	B2HSE8	>tr|B2HSE8|B2HSE8_MYCMM Conserved lipoprotein, LppF OS=Mycobacterium marinum (strain ATCC BAA-535 / M) GN=lppF PE=4 SV=1	11	11	33.4	45.273	9.41184	7.71475	11.4156	14.959	0.819686	0.675805	1.3104
MMAR_2263	2762	B2HPA8	>tr|B2HPA8|B2HPA8_MYCMM Unidentified antibiotic-transport ATP-binding protein ABC transporter OS=Mycobacterium marinum (strain ATCC BAA-535 / M) GN=MMAR_2263 PE=3 SV=1	16	16	49.2	34.353	16.8501	17.9776	26.6052	19.5759	1.06692	0.675719	0.735791
nuoM	832	B2HGD6	>tr|B2HGD6|B2HGD6_MYCMM NADH dehydrogenase I (Chain M) NuoM (NADH-ubiquinone oxidoreductase chain M) OS=Mycobacterium marinum (strain ATCC BAA-535 / M) GN=nuoM PE=3 SV=1	6	6	13.3	56.65	15.39	20.185	29.8812	19.109	1.31157	0.675508	0.639499
mgtE	2860	B2HPV4	>tr|B2HPV4|B2HPV4_MYCMM Mg2+ transport transmembrane protein MgtE OS=Mycobacterium marinum (strain ATCC BAA-535 / M) GN=mgtE PE=4 SV=1	9	9	17.3	49.401	13.382	13.9381	20.6336	26.8438	1.04156	0.675506	1.30097
pepQ	2543	B2HND1	>tr|B2HND1|B2HND1_MYCMM Cytoplasmic peptidase PepQ OS=Mycobacterium marinum (strain ATCC BAA-535 / M) GN=pepQ PE=4 SV=1	13	13	30.4	39.047	3.95866	3.05308	4.52406	10.8091	0.77124	0.674854	2.38924
secE2	2848	B2HPT6	>tr|B2HPT6|B2HPT6_MYCMM Protein transport protein SecE2 OS=Mycobacterium marinum (strain ATCC BAA-535 / M) GN=secE2 PE=4 SV=1	6	6	52.1	8.0261	6.44572	6.75177	10.0209	4.6496	1.04748	0.673771	0.463992
MMAR_3726	2284	B2HMC2	>tr|B2HMC2|B2HMC2_MYCMM Transcriptional regulator OS=Mycobacterium marinum (strain ATCC BAA-535 / M) GN=MMAR_3726 PE=4 SV=1	7	7	55.6	15.115	5.45319	5.695	8.45623	14.4375	1.04434	0.673468	1.70733
MMAR_2366	2957	B2HQ72	>tr|B2HQ72|B2HQ72_MYCMM Fatty acyl-CoA reductase OS=Mycobacterium marinum (strain ATCC BAA-535 / M) GN=MMAR_2366 PE=3 SV=1	34	34	72.2	36.349	110.765	106.174	157.867	117.586	0.958558	0.672555	0.744843
MMAR_1674	1350	B2HID0	>tr|B2HID0|B2HID0_MYCMM Penicillin-binding protein OS=Mycobacterium marinum (strain ATCC BAA-535 / M) GN=MMAR_1674 PE=4 SV=1	11	11	26.1	42.388	12.9488	13.316	19.8719	13.8942	1.02836	0.670091	0.699191
gdpD	3270	B2HRD8	>tr|B2HRD8|B2HRD8_MYCMM Glycerolphosphodiesterase GdpD OS=Mycobacterium marinum (strain ATCC BAA-535 / M) GN=gdpD PE=4 SV=1	8	8	31.1	31.689	9.42331	9.7814	14.5977	9.82068	1.038	0.670066	0.672757
MMAR_4516	221	B2HDN8	>tr|B2HDN8|B2HDN8_MYCMM Conserved hypothetical secreted protein OS=Mycobacterium marinum (strain ATCC BAA-535 / M) GN=MMAR_4516 PE=4 SV=1	17	17	39	48.39	22.3262	23.743	35.4423	29.9071	1.06346	0.669905	0.843825
MMAR_4510	216	B2HDN2	>tr|B2HDN2|B2HDN2_MYCMM Uncharacterized protein OS=Mycobacterium marinum (strain ATCC BAA-535 / M) GN=MMAR_4510 PE=4 SV=1	9	9	39.2	29.277	9.43477	5.695	8.50898	12.884	0.603618	0.669293	1.51417
MMAR_1930	1931	B2HKV8	>tr|B2HKV8|B2HKV8_MYCMM Conserved protein OS=Mycobacterium marinum (strain ATCC BAA-535 / M) GN=MMAR_1930 PE=4 SV=1	13	13	70.1	16.743	22.8282	25.375	37.9154	51.3531	1.11156	0.669255	1.35441
MMAR_1570	1052	B2HH90	>tr|B2HH90|B2HH90_MYCMM Conserved hypothetical secreted protein OS=Mycobacterium marinum (strain ATCC BAA-535 / M) GN=MMAR_1570 PE=4 SV=1	6	6	43.5	22.293	7.43825	4.10985	6.14145	8.77774	0.552529	0.669198	1.42926
MMAR_5239	1842	B2HKE7	>tr|B2HKE7|B2HKE7_MYCMM Uncharacterized protein OS=Mycobacterium marinum (strain ATCC BAA-535 / M) GN=MMAR_5239 PE=4 SV=1	5	5	23.4	16.853	6.95918	4.10985	6.14145	3.07427	0.590565	0.669198	0.500577
glnA1	1142	B2HHL7	>tr|B2HHL7|B2HHL7_MYCMM Glutamine synthetase OS=Mycobacterium marinum (strain ATCC BAA-535 / M) GN=glnA1 PE=3 SV=1	22	22	38.9	53.44	55.4097	36.1898	54.1304	45.9091	0.65313	0.668566	0.84812
cobQ2	1833	B2HKD8	>tr|B2HKD8|B2HKD8_MYCMM Cobyric acid synthase CobQ2 OS=Mycobacterium marinum (strain ATCC BAA-535 / M) GN=cobQ2 PE=4 SV=1	6	6	40	24.654	7.95171	7.23326	10.8238	7.7457	0.909649	0.668276	0.71562
MMAR_1841	1672	B2HJQ4	>tr|B2HJQ4|B2HJQ4_MYCMM Uncharacterized protein OS=Mycobacterium marinum (strain ATCC BAA-535 / M) GN=MMAR_1841 PE=4 SV=1	9	9	41.7	22.329	8.41931	6.72832	10.0736	8.7559	0.799154	0.667915	0.869191
qor_1	1759	B2HK39	>tr|B2HK39|B2HK39_MYCMM Quinone reductase, Qor_1 OS=Mycobacterium marinum (strain ATCC BAA-535 / M) GN=qor_1 PE=4 SV=1	11	11	43.9	39.97	6.42279	4.13329	6.1942	11.8629	0.643536	0.667284	1.91517
rplL	3536	B2HSI9	>tr|B2HSI9|B2HSI9_MYCMM 50S ribosomal protein L7/L12 OS=Mycobacterium marinum (strain ATCC BAA-535 / M) GN=rplL PE=3 SV=1	13	13	53.1	13.386	15.869	18.1418	27.1971	46.638	1.14322	0.667048	1.71481
glpD1	1181	B2HHS0	>tr|B2HHS0|B2HHS0_MYCMM Glycerol-3-phosphate dehydrogenase GlpD1 OS=Mycobacterium marinum (strain ATCC BAA-535 / M) GN=glpD1 PE=3 SV=1	22	22	52.1	53.657	25.2809	26.7961	40.1774	28.3864	1.05993	0.666944	0.706526
MMAR_2715	3645	B2HSY3	>tr|B2HSY3|B2HSY3_MYCMM Uncharacterized protein OS=Mycobacterium marinum (strain ATCC BAA-535 / M) GN=MMAR_2715 PE=4 SV=1	12	12	26	37.303	14.865	13.985	21.0029	19.1199	0.940801	0.665862	0.910346
mce2A	1010	B2HH32	>tr|B2HH32|B2HH32_MYCMM MCE-family protein Mce2A OS=Mycobacterium marinum (strain ATCC BAA-535 / M) GN=mce2A PE=4 SV=1	8	8	21.9	42.836	5.95518	6.70488	10.0736	3.08518	1.12589	0.665588	0.306264
MMAR_4400	3718	B2HT86	>tr|B2HT86|B2HT86_MYCMM Uncharacterized protein OS=Mycobacterium marinum (strain ATCC BAA-535 / M) GN=MMAR_4400 PE=4 SV=1	5	5	30.7	13.77	5.46465	4.15674	6.24695	0.510558	0.76066	0.665402	0.0817292
pknH_2	1964	B2HL11	>tr|B2HL11|B2HL11_MYCMM Transmembrane serine/threonine-protein kinase H PknH_2 OS=Mycobacterium marinum (strain ATCC BAA-535 / M) GN=pknH_2 PE=3 SV=1	20	20	46.3	64.198	50.1515	57.7723	86.9298	50.5805	1.15196	0.664586	0.581855
MMAR_0667	2857	B2HPV1	>tr|B2HPV1|B2HPV1_MYCMM Glycosyl hydrolase OS=Mycobacterium marinum (strain ATCC BAA-535 / M) GN=MMAR_0667 PE=4 SV=1	15	14	54.4	40.864	22.3147	19.5628	29.4591	22.1723	0.876676	0.664066	0.752647
MMAR_3720	2278	B2HMB6	>tr|B2HMB6|B2HMB6_MYCMM FAD-dependent oxidoreductase OS=Mycobacterium marinum (strain ATCC BAA-535 / M) GN=MMAR_3720 PE=4 SV=1	22	21	55.6	42.438	17.3177	15.4061	23.2649	18.5548	0.889614	0.662201	0.797542
MMAR_2160	2526	B2HNB1	>tr|B2HNB1|B2HNB1_MYCMM Transmembrane alanine and valine and leucine rich protein OS=Mycobacterium marinum (strain ATCC BAA-535 / M) GN=MMAR_2160 PE=4 SV=1	10	10	23	36.771	13.4164	13.4098	20.2527	21.1512	0.999507	0.66212	1.04436
phoH1	2030	B2HLB8	>tr|B2HLB8|B2HLB8_MYCMM PhoH-like protein PhoH1 OS=Mycobacterium marinum (strain ATCC BAA-535 / M) GN=phoH1 PE=4 SV=1	8	8	29.5	37.803	6.44572	3.02963	4.57681	5.65981	0.470022	0.661952	1.23663
phoT	990	B2HH09	>tr|B2HH09|B2HH09_MYCMM Phosphate-transport ATP-binding protein ABC transporter, PhoT OS=Mycobacterium marinum (strain ATCC BAA-535 / M) GN=phoT PE=3 SV=1	17	17	62.4	28.387	20.3755	21.6998	32.7994	29.4075	1.06499	0.661591	0.896585
MMAR_3573	1764	B2HK47	>tr|B2HK47|B2HK47_MYCMM Uncharacterized protein OS=Mycobacterium marinum (strain ATCC BAA-535 / M) GN=MMAR_3573 PE=4 SV=1	9	9	29.6	32.741	11.4198	9.75795	14.7559	10.8091	0.854474	0.66129	0.732522
rplF	9	B2HCT6	>sp|B2HCT6|RL6_MYCMM 50S ribosomal protein L6 OS=Mycobacterium marinum (strain ATCC BAA-535 / M) GN=rplF PE=3 SV=1	18	18	61.5	19.457	54.6121	45.3255	68.6226	57.6301	0.829954	0.660505	0.839812
MMAR_3319	1167	B2HHP7	>tr|B2HHP7|B2HHP7_MYCMM Dehydrogenase OS=Mycobacterium marinum (strain ATCC BAA-535 / M) GN=MMAR_3319 PE=4 SV=1	9	9	28	35.798	9.91384	6.68143	10.1264	7.22423	0.67395	0.659805	0.713407
dfp	2711	B2HP49	>tr|B2HP49|B2HP49_MYCMM DNA/pantothenate metabolism flavoprotein, Dfp OS=Mycobacterium marinum (strain ATCC BAA-535 / M) GN=dfp PE=4 SV=1	14	14	33.4	43.39	12.8914	9.29991	14.1113	9.28829	0.721402	0.65904	0.658217
MMAR_1901	1911	B2HKS9	>tr|B2HKS9|B2HKS9_MYCMM ABC-type sugar transport protein, ATPase component OS=Mycobacterium marinum (strain ATCC BAA-535 / M) GN=MMAR_1901 PE=3 SV=1	10	10	35.3	39.067	7.92878	6.63454	10.0736	7.76753	0.836766	0.658605	0.771077
MMAR_0893	3346	B2HRN8	>tr|B2HRN8|B2HRN8_MYCMM Conserved protein OS=Mycobacterium marinum (strain ATCC BAA-535 / M) GN=MMAR_0893 PE=4 SV=1	12	12	62.7	22.242	16.873	15.5467	23.6458	20.0755	0.921396	0.657485	0.84901
echA1	2441	B2HMZ1	>tr|B2HMZ1|B2HMZ1_MYCMM Enoyl-CoA hydratase EchA1 OS=Mycobacterium marinum (strain ATCC BAA-535 / M) GN=echA1 PE=1 SV=1	12	12	33.1	27.113	5.46465	5.16662	7.86434	8.74499	0.945461	0.656967	1.11198
MMAR_0746	3080	B2HQN6	>tr|B2HQN6|B2HQN6_MYCMM Tuberculin related peptide OS=Mycobacterium marinum (strain ATCC BAA-535 / M) GN=MMAR_0746 PE=4 SV=1	7	7	41.9	16.71	10.8949	6.65798	10.1791	6.70275	0.61111	0.654082	0.65848
prcA	737	B2HFV5	>sp|B2HFV5|PSA_MYCMM Proteasome subunit alpha OS=Mycobacterium marinum (strain ATCC BAA-535 / M) GN=prcA PE=3 SV=1	12	12	33.3	29.218	6.95918	2.57158	3.93217	5.14925	0.369524	0.653986	1.30952
MMAR_2179	2542	B2HND0	>tr|B2HND0|B2HND0_MYCMM Conserved transmembrane protein OS=Mycobacterium marinum (strain ATCC BAA-535 / M) GN=MMAR_2179 PE=4 SV=1	15	15	48.4	26.791	79.5515	75.9141	116.208	69.7659	0.954276	0.653263	0.600356
MMAR_2507	3231	B2HR72	>tr|B2HR72|B2HR72_MYCMM O-methyltransferase OS=Mycobacterium marinum (strain ATCC BAA-535 / M) GN=MMAR_2507 PE=4 SV=1	10	10	36.4	27.464	7.44971	7.76165	11.902	13.3946	1.04187	0.652128	1.1254
MMAR_1997	2171	B2HLY3	>tr|B2HLY3|B2HLY3_MYCMM Conserved hypothetical hydrolase OS=Mycobacterium marinum (strain ATCC BAA-535 / M) GN=MMAR_1997 PE=4 SV=1	16	16	47.2	36.929	22.7823	15.3123	23.4875	23.2371	0.672111	0.651932	0.989338
aofH_1	1196	B2HHU0	>tr|B2HHU0|B2HHU0_MYCMM Flavin-containing monoamine oxidase AofH_1 OS=Mycobacterium marinum (strain ATCC BAA-535 / M) GN=aofH_1 PE=4 SV=1	17	17	41.4	48.921	12.378	10.3567	15.887	21.6618	0.836702	0.651898	1.36349
ndh_1	2874	B2HPX1	>tr|B2HPX1|B2HPX1_MYCMM NADH dehydrogenase Ndh_1 OS=Mycobacterium marinum (strain ATCC BAA-535 / M) GN=ndh_1 PE=4 SV=1	30	30	58	50.73	63.5334	77.382	118.704	101.683	1.21797	0.651892	0.856608
MMAR_3540	1741	B2HK15	>tr|B2HK15|B2HK15_MYCMM Conserved hypothetical secreted protein OS=Mycobacterium marinum (strain ATCC BAA-535 / M) GN=MMAR_3540 PE=4 SV=1	11	11	35.1	21.241	9.93677	11.3666	17.4516	13.4164	1.14389	0.651319	0.76878
MMAR_3754	2306	B2HMF0	>tr|B2HMF0|B2HMF0_MYCMM Conserved hypothetical membrane protein OS=Mycobacterium marinum (strain ATCC BAA-535 / M) GN=MMAR_3754 PE=4 SV=1	11	11	20.5	50.192	16.9647	22.1813	34.1003	19.109	1.30749	0.650472	0.560376
accA1	2601	B2HNK6	>tr|B2HNK6|B2HNK6_MYCMM Acetyl-/propionyl-coenzyme A carboxylase alpha chain AccA1 OS=Mycobacterium marinum (strain ATCC BAA-535 / M) GN=accA1 PE=4 SV=1	25	25	43.6	71.594	18.8466	9.87519	15.1896	8.24535	0.523977	0.65013	0.54283
proV	2066	B2HLH3	>tr|B2HLH3|B2HLH3_MYCMM Osmoprotectant transport ATP-binding protein ABC transporter ProV OS=Mycobacterium marinum (strain ATCC BAA-535 / M) GN=proV PE=3 SV=1	13	13	34.5	38.66	12.8914	10.7444	16.5316	11.3524	0.833451	0.64993	0.686707
MMAR_1069	24	B2HCV3	>sp|B2HCV3|Y1069_MYCMM Putative S-adenosyl-L-methionine-dependent methyltransferase MMAR_1069 OS=Mycobacterium marinum (strain ATCC BAA-535 / M) GN=MMAR_1069 PE=3 SV=1	10	8	31	34.269	7.96318	4.0864	6.29971	7.7457	0.513162	0.648665	1.22953
MMAR_0661	2852	B2HPU5	>tr|B2HPU5|B2HPU5_MYCMM Membrane oxidoreductase OS=Mycobacterium marinum (strain ATCC BAA-535 / M) GN=MMAR_0661 PE=4 SV=1	9	9	43.3	23.995	28.749	27.3713	42.2284	39.706	0.95208	0.648174	0.940267
MMAR_3040	579	B2HF59	>tr|B2HF59|B2HF59_MYCMM Short-chain dehydrogenase OS=Mycobacterium marinum (strain ATCC BAA-535 / M) GN=MMAR_3040 PE=3 SV=1	13	13	59.3	28.757	14.3745	11.39	17.6099	19.5759	0.792376	0.646797	1.11164
aroB	2540	B2HNC8	>tr|B2HNC8|B2HNC8_MYCMM 3-dehydroquinate synthase OS=Mycobacterium marinum (strain ATCC BAA-535 / M) GN=aroB PE=3 SV=1	10	10	23.5	38.212	8.93278	6.1296	9.48174	10.8527	0.686192	0.646464	1.14459
MMAR_3114	761	B2HFY5	>tr|B2HFY5|B2HFY5_MYCMM Conserved protein OS=Mycobacterium marinum (strain ATCC BAA-535 / M) GN=MMAR_3114 PE=4 SV=1	9	9	51.8	21.318	5.94372	3.6518	5.65507	5.67072	0.614397	0.645757	1.00277
MMAR_3539	1740	B2HK14	>tr|B2HK14|B2HK14_MYCMM Uncharacterized protein OS=Mycobacterium marinum (strain ATCC BAA-535 / M) GN=MMAR_3539 PE=3 SV=1	11	11	28.8	28.076	10.4273	13.9381	21.5948	14.9699	1.3367	0.64544	0.69322
MMAR_5126	1572	B2HJ67	>tr|B2HJ67|B2HJ67_MYCMM Uncharacterized protein OS=Mycobacterium marinum (strain ATCC BAA-535 / M) GN=MMAR_5126 PE=4 SV=1	18	18	36.9	38.509	24.7559	15.2888	23.8041	20.1192	0.617582	0.642278	0.8452
cyp136A2	1093	B2HHF2	>tr|B2HHF2|B2HHF2_MYCMM Cytochrome P450 136A2 Cyp136A2 OS=Mycobacterium marinum (strain ATCC BAA-535 / M) GN=cyp136A2 PE=3 SV=1	18	18	34.1	55.992	11.8989	7.25671	11.3101	9.28829	0.609864	0.641611	0.821236
corA	3301	B2HRH6	>tr|B2HRH6|B2HRH6_MYCMM Magnesium and cobalt transport transmembrane protein CorA OS=Mycobacterium marinum (strain ATCC BAA-535 / M) GN=corA PE=4 SV=1	22	22	47	41.643	38.2182	35.1095	54.7223	61.4441	0.918661	0.641595	1.12284
mce4D	1237	B2HHY8	>tr|B2HHY8|B2HHY8_MYCMM MCE-family protein Mce4D OS=Mycobacterium marinum (strain ATCC BAA-535 / M) GN=mce4D PE=4 SV=1	10	10	21	49.952	22.8626	17.0616	26.6052	19.0981	0.746265	0.641286	0.717832
MMAR_0551	2668	B2HNX3	>tr|B2HNX3|B2HNX3_MYCMM Conserved transmembrane protein OS=Mycobacterium marinum (strain ATCC BAA-535 / M) GN=MMAR_0551 PE=4 SV=1	17	17	53.1	36.661	37.2027	29.227	45.6214	36.6208	0.785614	0.640641	0.80271
sigF	297	B2HDZ0	>tr|B2HDZ0|B2HDZ0_MYCMM Alternate RNA polymerase sigma factor SigF OS=Mycobacterium marinum (strain ATCC BAA-535 / M) GN=sigF PE=4 SV=1	11	11	51.9	29.192	9.94824	6.1296	9.58724	8.26718	0.616149	0.63935	0.86231
MMAR_1679	1355	B2HID5	>tr|B2HID5|B2HID5_MYCMM Conserved hypothetical membrane protein OS=Mycobacterium marinum (strain ATCC BAA-535 / M) GN=MMAR_1679 PE=4 SV=1	16	16	38.1	48.901	13.8725	15.5467	24.3432	19.0981	1.12069	0.638649	0.784534
MMAR_3601	1981	B2HL39	>tr|B2HL39|B2HL39_MYCMM Uncharacterized protein OS=Mycobacterium marinum (strain ATCC BAA-535 / M) GN=MMAR_3601 PE=4 SV=1	15	15	28.1	66.395	6.92478	3.60491	5.65507	5.13833	0.520581	0.637465	0.908624
cydB	3169	B2HQY9	>tr|B2HQY9|B2HQY9_MYCMM Integral membrane cytochrome D ubiquinol oxidase (Subunit II) CydB OS=Mycobacterium marinum (strain ATCC BAA-535 / M) GN=cydB PE=4 SV=1	3	3	6.1	37.763	8.44224	9.80485	15.4006	14.9699	1.1614	0.636655	0.972037
MMAR_3600	1980	B2HL38	>tr|B2HL38|B2HL38_MYCMM DNA repair exonuclease OS=Mycobacterium marinum (strain ATCC BAA-535 / M) GN=MMAR_3600 PE=4 SV=1	13	13	42.2	45.515	12.9029	14.0085	22.0284	18.066	1.08568	0.635928	0.820124
MMAR_1062	18	B2HCU6	>tr|B2HCU6|B2HCU6_MYCMM Methyltransferase OS=Mycobacterium marinum (strain ATCC BAA-535 / M) GN=MMAR_1062 PE=4 SV=1	17	17	68.6	24.695	14.3974	13.9616	22.0284	15.991	0.969728	0.633799	0.725929
lldD1	3563	B2HSM1	>tr|B2HSM1|B2HSM1_MYCMM L-lactate dehydrogenase (Cytochrome) LldD1 OS=Mycobacterium marinum (strain ATCC BAA-535 / M) GN=lldD1 PE=4 SV=1	14	14	37.2	41.68	22.8397	18.4357	29.1954	20.6188	0.807178	0.63146	0.706236
lpqD	226	B2HDP6	>tr|B2HDP6|B2HDP6_MYCMM Conserved lipoprotein, LpqD OS=Mycobacterium marinum (strain ATCC BAA-535 / M) GN=lpqD PE=4 SV=1	10	10	58.6	24.668	22.8397	29.9898	47.5026	27.3762	1.31306	0.63133	0.576309
glnQ	1333	B2HIA6	>tr|B2HIA6|B2HIA6_MYCMM ABC transporter permease protein GlnQ OS=Mycobacterium marinum (strain ATCC BAA-535 / M) GN=glnQ PE=4 SV=1	11	11	14.3	62.111	6.94771	5.67155	8.99536	10.8309	0.816319	0.630498	1.20405
MMAR_0789	3116	B2HQS9	>tr|B2HQS9|B2HQS9_MYCMM Conserved protein OS=Mycobacterium marinum (strain ATCC BAA-535 / M) GN=MMAR_0789 PE=4 SV=1	13	13	64.4	21.197	14.8994	11.9184	19.069	18.5111	0.799923	0.625014	0.970744
MMAR_3588	1974	B2HL28	>tr|B2HL28|B2HL28_MYCMM Uncharacterized protein OS=Mycobacterium marinum (strain ATCC BAA-535 / M) GN=MMAR_3588 PE=4 SV=1	7	7	36.9	22.155	6.93625	7.78509	12.4939	9.29921	1.12238	0.623111	0.744299
MMAR_2207	2714	B2HP52	>tr|B2HP52|B2HP52_MYCMM Monoxygenase OS=Mycobacterium marinum (strain ATCC BAA-535 / M) GN=MMAR_2207 PE=4 SV=1	17	17	32	55.823	11.9333	10.8382	17.4516	14.4485	0.908229	0.621042	0.827916
MMAR_3023	564	B2HF42	>tr|B2HF42|B2HF42_MYCMM Conserved hypothetical membrane protein OS=Mycobacterium marinum (strain ATCC BAA-535 / M) GN=MMAR_3023 PE=4 SV=1	8	8	20.2	32.118	7.46118	8.74808	14.1113	14.9372	1.17248	0.619934	1.05853
MMAR_3247	964	B2HGX1	>tr|B2HGX1|B2HGX1_MYCMM Conserved protein OS=Mycobacterium marinum (strain ATCC BAA-535 / M) GN=MMAR_3247 PE=4 SV=1	15	15	51.1	24.389	30.7455	33.6416	54.3414	45.4204	1.0942	0.619079	0.835833
MMAR_1533	883	B2HGJ8	>tr|B2HGJ8|B2HGJ8_MYCMM Conserved hypothetical membrane protein OS=Mycobacterium marinum (strain ATCC BAA-535 / M) GN=MMAR_1533 PE=4 SV=1	9	9	35.4	30.92	9.87945	6.63454	10.7183	8.2126	0.67155	0.618994	0.766225
MMAR_0724	2900	B2HQ06	>tr|B2HQ06|B2HQ06_MYCMM Conserved hypothetical membrane protein OS=Mycobacterium marinum (strain ATCC BAA-535 / M) GN=MMAR_0724 PE=4 SV=1	3	3	22.7	11.513	18.3332	19.6331	31.7212	29.9617	1.07091	0.618929	0.944534
MMAR_5337	2088	B2HLK9	>tr|B2HLK9|B2HLK9_MYCMM L-rhamnosyltransferase OS=Mycobacterium marinum (strain ATCC BAA-535 / M) GN=MMAR_5337 PE=4 SV=1	18	18	51.5	34.35	34.6583	23.027	37.2707	30.961	0.664401	0.617832	0.830705
MMAR_1008	3553	B2HSK7	>tr|B2HSK7|B2HSK7_MYCMM Conserved hypothetical membrane protein OS=Mycobacterium marinum (strain ATCC BAA-535 / M) GN=MMAR_1008 PE=4 SV=1	11	11	43	15.662	25.2809	27.3244	44.2678	40.7817	1.08083	0.617253	0.921249
MMAR_0119	1602	B2HJC0	>tr|B2HJC0|B2HJC0_MYCMM Conserved hypothetical membrane protein OS=Mycobacterium marinum (strain ATCC BAA-535 / M) GN=MMAR_0119 PE=4 SV=1	9	9	26.6	44.295	17.375	21.6998	35.2081	19.1417	1.24891	0.616329	0.543674
MMAR_2026	2197	B2HM12	>tr|B2HM12|B2HM12_MYCMM Antibiotic-transport ATP-binding protein ABC transporter OS=Mycobacterium marinum (strain ATCC BAA-535 / M) GN=MMAR_2026 PE=3 SV=1	14	14	45.5	32.547	13.3934	11.8715	19.28	17.49	0.886367	0.615741	0.907157
MMAR_5441	2390	B2HMS9	>tr|B2HMS9|B2HMS9_MYCMM Uncharacterized protein OS=Mycobacterium marinum (strain ATCC BAA-535 / M) GN=MMAR_5441 PE=4 SV=1	6	6	31.2	29.825	5.44172	4.10985	6.68058	9.77702	0.755247	0.615193	1.4635
ephD_1	1933	B2HKW0	>tr|B2HKW0|B2HKW0_MYCMM Short-chain dehydrogenase EphD_1 OS=Mycobacterium marinum (strain ATCC BAA-535 / M) GN=ephD_1 PE=3 SV=1	19	19	32.1	61.809	19.8391	18.1183	29.4591	24.2364	0.913261	0.615033	0.822713
gpdA1	3366	B2HRR0	>tr|B2HRR0|B2HRR0_MYCMM Glycerol-3-phosphate dehydrogenase [NAD(P)+] OS=Mycobacterium marinum (strain ATCC BAA-535 / M) GN=gpdA1 PE=3 SV=1	14	14	57.5	36.156	17.8541	14.9715	24.3432	18.5984	0.838545	0.615017	0.764009
MMAR_3806	2571	B2HNG3	>tr|B2HNG3|B2HNG3_MYCMM Conserved integral membrane transport protein OS=Mycobacterium marinum (strain ATCC BAA-535 / M) GN=MMAR_3806 PE=4 SV=1	4	4	12.2	55.76	7.43825	10.2863	16.7542	6.71367	1.3829	0.613956	0.400716
pepA	2109	B2HLP2	>tr|B2HLP2|B2HLP2_MYCMM Serine protease PepA OS=Mycobacterium marinum (strain ATCC BAA-535 / M) GN=pepA PE=4 SV=1	8	8	27.7	35.104	11.9104	13.9616	22.7785	9.28829	1.17222	0.612927	0.407765
MMAR_2060	2224	B2HM46	>tr|B2HM46|B2HM46_MYCMM Catalase OS=Mycobacterium marinum (strain ATCC BAA-535 / M) GN=MMAR_2060 PE=4 SV=1	16	16	54.9	33.475	29.2739	25.1875	41.0974	46.9848	0.860406	0.612873	1.14325
mce4B	1239	B2HHZ0	>tr|B2HHZ0|B2HHZ0_MYCMM MCE-family protein Mce4B OS=Mycobacterium marinum (strain ATCC BAA-535 / M) GN=mce4B PE=4 SV=1	15	14	29.7	37.097	12.4009	10.3567	16.9652	12.3953	0.835155	0.610466	0.730631
MMAR_0215	1854	B2HKH9	>tr|B2HKH9|B2HKH9_MYCMM Glutamine-transport transmembrane protein ABC transporter OS=Mycobacterium marinum (strain ATCC BAA-535 / M) GN=MMAR_0215 PE=4 SV=1	16	16	46.1	36.447	28.7719	24.0369	39.4272	30.4286	0.835429	0.609652	0.771766
MMAR_1973	1957	B2HL02	>tr|B2HL02|B2HL02_MYCMM Conserved protein OS=Mycobacterium marinum (strain ATCC BAA-535 / M) GN=MMAR_1973 PE=4 SV=1	6	6	42.5	16.353	29.3198	26.8664	44.1623	32.0258	0.916323	0.608356	0.725183
MMAR_3182	914	B2HGQ5	>tr|B2HGQ5|B2HGQ5_MYCMM Conserved protein OS=Mycobacterium marinum (strain ATCC BAA-535 / M) GN=MMAR_3182 PE=4 SV=1	18	18	60.1	34.075	49.638	42.2021	69.3727	64.5075	0.850198	0.608339	0.929868
MMAR_4182	3287	B2HRF8	>tr|B2HRF8|B2HRF8_MYCMM Conserved hypothetical integral membrane protein OS=Mycobacterium marinum (strain ATCC BAA-535 / M) GN=MMAR_4182 PE=4 SV=1	4	4	13.9	43.193	0.992531	5.19006	8.56174	17.5009	5.22912	0.606193	2.04408
MMAR_5378	2354	B2HML3	>tr|B2HML3|B2HML3_MYCMM Acyltransferase OS=Mycobacterium marinum (strain ATCC BAA-535 / M) GN=MMAR_5378 PE=4 SV=1	18	18	57.4	27.529	22.3377	16.0517	26.5525	18.5657	0.718592	0.604527	0.699207
MMAR_3731	2288	B2HMC7	>tr|B2HMC7|B2HMC7_MYCMM Uncharacterized protein OS=Mycobacterium marinum (strain ATCC BAA-535 / M) GN=MMAR_3731 PE=4 SV=1	10	10	33.8	36.329	9.42331	4.06295	6.73333	3.59574	0.43116	0.603409	0.534021
MMAR_2771	119	B2HD76	>tr|B2HD76|B2HD76_MYCMM Uncharacterized protein OS=Mycobacterium marinum (strain ATCC BAA-535 / M) GN=MMAR_2771 PE=4 SV=1	2	2	16	16.329	6.93625	6.19994	10.2846	6.71367	0.893846	0.602835	0.652786
mkl	3539	B2HSJ2	>tr|B2HSJ2|B2HSJ2_MYCMM Ribonucleotide-transport ATP-binding protein ABC transporter, Mkl OS=Mycobacterium marinum (strain ATCC BAA-535 / M) GN=mkl PE=3 SV=1	24	24	55.5	35.896	218.414	176.218	292.593	202.082	0.806809	0.602265	0.690659
MMAR_3394	1459	B2HIR3	>tr|B2HIR3|B2HIR3_MYCMM Oxidoreductase OS=Mycobacterium marinum (strain ATCC BAA-535 / M) GN=MMAR_3394 PE=4 SV=1	23	22	44.5	45.496	21.3337	15.9344	26.5525	26.7783	0.746915	0.600112	1.0085
MMAR_1015	3560	B2HSL4	>tr|B2HSL4|B2HSL4_MYCMM Conserved membrane protein OS=Mycobacterium marinum (strain ATCC BAA-535 / M) GN=MMAR_1015 PE=4 SV=1	15	15	40.9	28.912	52.5927	61.9525	103.461	70.2219	1.17797	0.598798	0.678725
MMAR_3586	1972	B2HL26	>tr|B2HL26|B2HL26_MYCMM Uncharacterized protein OS=Mycobacterium marinum (strain ATCC BAA-535 / M) GN=MMAR_3586 PE=4 SV=1	21	21	77.5	22.63	22.8511	28.9565	48.4226	61.8019	1.26718	0.597996	1.2763
rodA	1302	B2HI64	>tr|B2HI64|B2HI64_MYCMM Cell division protein RodA OS=Mycobacterium marinum (strain ATCC BAA-535 / M) GN=rodA PE=4 SV=1	7	7	13.6	50.551	5.95518	3.05308	5.11594	3.11793	0.512675	0.596777	0.609454
MMAR_0846	3315	B2HRJ5	>tr|B2HRJ5|B2HRJ5_MYCMM Conserved transmembrane protein OS=Mycobacterium marinum (strain ATCC BAA-535 / M) GN=MMAR_0846 PE=4 SV=1	7	7	43.3	19.171	17.3979	18.5295	31.0765	19.1199	1.06504	0.596253	0.615252
MMAR_1528	878	B2HGJ3	>tr|B2HGJ3|B2HGJ3_MYCMM Conserved transmembrane protein OS=Mycobacterium marinum (strain ATCC BAA-535 / M) GN=MMAR_1528 PE=4 SV=1	9	9	36.6	35.329	11.9218	7.7382	12.9803	20.6843	0.649078	0.59615	1.59352
MMAR_1165	235	B2HDQ7	>tr|B2HDQ7|B2HDQ7_MYCMM Conserved hypothetical regultory protein OS=Mycobacterium marinum (strain ATCC BAA-535 / M) GN=MMAR_1165 PE=4 SV=1	42	42	48.6	96.388	87.9135	104.342	175.179	137.228	1.18687	0.595634	0.783359
wrbA	1134	B2HHK6	>tr|B2HHK6|B2HHK6_MYCMM Multimeric flavodoxin WrbA OS=Mycobacterium marinum (strain ATCC BAA-535 / M) GN=wrbA PE=4 SV=1	10	10	38	27.475	14.9224	12.3764	20.7919	18.5329	0.829389	0.595253	0.891354
fadE18_2	2293	B2HMD4	>tr|B2HMD4|B2HMD4_MYCMM Acyl-CoA dehydrogenase FadE18_2 OS=Mycobacterium marinum (strain ATCC BAA-535 / M) GN=fadE18_2 PE=3 SV=1	9	9	28.5	39.757	5.44172	3.07652	5.16869	10.8091	0.565358	0.595222	2.09125
MMAR_3596	1976	B2HL34	>tr|B2HL34|B2HL34_MYCMM Uncharacterized protein OS=Mycobacterium marinum (strain ATCC BAA-535 / M) GN=MMAR_3596 PE=4 SV=1	19	19	40.5	62.496	12.3894	6.68143	11.2574	15.4805	0.539284	0.593515	1.37514
rplR	10	B2HCT7	>sp|B2HCT7|RL18_MYCMM 50S ribosomal protein L18 OS=Mycobacterium marinum (strain ATCC BAA-535 / M) GN=rplR PE=3 SV=1	15	15	70.4	14.593	39.6898	31.07	52.3548	38.7503	0.782822	0.593452	0.740149
MMAR_1714	1382	B2HIG9	>tr|B2HIG9|B2HIG9_MYCMM Alanine rich dehydrogenase OS=Mycobacterium marinum (strain ATCC BAA-535 / M) GN=MMAR_1714 PE=4 SV=1	11	11	30.5	50.115	8.40785	5.71845	9.64	9.27738	0.680132	0.5932	0.962384
fbpD	2345	B2HMK2	>tr|B2HMK2|B2HMK2_MYCMM Secreted Mpt51/Mpb51 antigen protein FbpD OS=Mycobacterium marinum (strain ATCC BAA-535 / M) GN=fbpD PE=4 SV=1	5	5	27.9	30.892	6.97065	7.76165	13.0858	5.14925	1.11348	0.593135	0.393499
MMAR_0301	2095	B2HLL9	>tr|B2HLL9|B2HLL9_MYCMM Uncharacterized protein OS=Mycobacterium marinum (strain ATCC BAA-535 / M) GN=MMAR_0301 PE=4 SV=1	10	10	71.9	17.208	8.43078	5.695	9.64	5.14925	0.675501	0.590768	0.534154
galE5	2908	B2HQ16	>tr|B2HQ16|B2HQ16_MYCMM UDP-glucose 4-epimerase, GalE5 OS=Mycobacterium marinum (strain ATCC BAA-535 / M) GN=galE5 PE=4 SV=1	11	11	36	37.656	18.8352	8.67774	14.7032	7.21331	0.46072	0.590194	0.490595
ephC	3669	B2HT20	>tr|B2HT20|B2HT20_MYCMM Epoxide hydrolase EphC OS=Mycobacterium marinum (strain ATCC BAA-535 / M) GN=ephC PE=4 SV=1	14	14	46.2	33.324	14.3401	10.2629	17.3988	19.109	0.715678	0.589861	1.09829
MMAR_2904	340	B2HE64	>tr|B2HE64|B2HE64_MYCMM Conserved hypothetical O-methyltransferase OS=Mycobacterium marinum (strain ATCC BAA-535 / M) GN=MMAR_2904 PE=3 SV=1	11	11	41.8	31.272	21.3337	18.5529	31.4574	28.8642	0.869654	0.58978	0.917564
MMAR_5521	3237	B2HR90	>tr|B2HR90|B2HR90_MYCMM Peptidase S15 OS=Mycobacterium marinum (strain ATCC BAA-535 / M) GN=MMAR_5521 PE=4 SV=1	11	11	21.3	65.633	5.97811	4.63823	7.86434	4.11721	0.775869	0.58978	0.523529
amiC_2	1211	B2HHV8	>tr|B2HHV8|B2HHV8_MYCMM Amidase, AmiC_2 OS=Mycobacterium marinum (strain ATCC BAA-535 / M) GN=amiC_2 PE=4 SV=1	17	17	43.3	52.476	20.7973	15.0184	25.4742	12.9495	0.722131	0.589552	0.508339
MMAR_3730	2287	B2HMC6	>tr|B2HMC6|B2HMC6_MYCMM Conserved hypothetical transglutaminase-like protein OS=Mycobacterium marinum (strain ATCC BAA-535 / M) GN=MMAR_3730 PE=4 SV=1	10	10	32.6	31.018	13.884	6.63454	11.2574	7.23514	0.477856	0.58935	0.642702
accD1	2602	B2HNK7	>tr|B2HNK7|B2HNK7_MYCMM Acetyl-/propionyl-CoA carboxylase (Beta subunit) AccD1 OS=Mycobacterium marinum (strain ATCC BAA-535 / M) GN=accD1 PE=4 SV=1	22	22	47.5	56.464	18.8008	9.32335	15.8342	8.26718	0.495903	0.588811	0.522109
MMAR_5333	2085	B2HLK5	>tr|B2HLK5|B2HLK5_MYCMM Aminotransferase OS=Mycobacterium marinum (strain ATCC BAA-535 / M) GN=MMAR_5333 PE=3 SV=1	7	7	25.4	42.061	5.46465	4.0864	6.94435	8.25626	0.747788	0.58845	1.18892
MMAR_0010	1293	B2HI55	>tr|B2HI55|B2HI55_MYCMM Uncharacterized protein OS=Mycobacterium marinum (strain ATCC BAA-535 / M) GN=MMAR_0010 PE=4 SV=1	7	7	42.3	15.239	47.5727	42.8477	73.0939	72.5698	0.90068	0.586201	0.992829
dedA	2226	B2HM49	>tr|B2HM49|B2HM49_MYCMM Transmembrane protein DedA OS=Mycobacterium marinum (strain ATCC BAA-535 / M) GN=dedA PE=4 SV=1	5	5	15.1	23.244	10.9178	10.2863	17.5571	8.74499	0.942159	0.585879	0.498088
MMAR_4682	628	B2HFC4	>tr|B2HFC4|B2HFC4_MYCMM Uncharacterized protein OS=Mycobacterium marinum (strain ATCC BAA-535 / M) GN=MMAR_4682 PE=4 SV=1	7	7	41.8	15.904	3.97012	4.66168	7.96985	15.0245	1.17419	0.584914	1.88517
MMAR_3345	1184	B2HHS3	>tr|B2HHS3|B2HHS3_MYCMM Uncharacterized protein OS=Mycobacterium marinum (strain ATCC BAA-535 / M) GN=MMAR_3345 PE=4 SV=1	9	9	27.5	34.249	12.4124	6.63454	11.3629	11.396	0.53451	0.583877	1.00292
lpqH	2075	B2HLI7	>tr|B2HLI7|B2HLI7_MYCMM 19 kDa lipoprotein antigen LpqH OS=Mycobacterium marinum (strain ATCC BAA-535 / M) GN=lpqH PE=4 SV=1	5	5	61.6	9.5596	24.4259	39.3366	67.5855	53.177	1.61045	0.582028	0.78681
MMAR_0445	2429	B2HMX3	>tr|B2HMX3|B2HMX3_MYCMM Conserved transmembrane protein OS=Mycobacterium marinum (strain ATCC BAA-535 / M) GN=MMAR_0445 PE=4 SV=1	8	8	13.9	40.581	8.45371	7.16292	12.3356	18.0988	0.847311	0.580669	1.46719
MMAR_0525	2649	B2HNU7	>tr|B2HNU7|B2HNU7_MYCMM Periplasmic iron-transport lipoprotein OS=Mycobacterium marinum (strain ATCC BAA-535 / M) GN=MMAR_0525 PE=4 SV=1	5	5	14.5	35.067	5.96665	4.59134	7.9171	5.69255	0.7695	0.579927	0.71902
MMAR_1044	3	B2HCT0	>tr|B2HCT0|B2HCT0_MYCMM Conserved transmembrane protein OS=Mycobacterium marinum (strain ATCC BAA-535 / M) GN=MMAR_1044 PE=4 SV=1	9	9	44.2	34.196	17.375	14.9246	25.8023	14.4266	0.858967	0.57842	0.559121
fadD12_2	1895	B2HKQ8	>tr|B2HKQ8|B2HKQ8_MYCMM Long-chain-fatty-acid--CoA ligase FadD12_2 OS=Mycobacterium marinum (strain ATCC BAA-535 / M) GN=fadD12_2 PE=4 SV=1	21	21	43.2	55.757	20.8202	19.5628	33.8777	17.0231	0.939606	0.577454	0.502487
MMAR_1666	1116	B2HHI4	>tr|B2HHI4|B2HHI4_MYCMM Hypothetical membrane protein OS=Mycobacterium marinum (strain ATCC BAA-535 / M) GN=MMAR_1666 PE=4 SV=1	2	2	13.2	13.428	5.45319	6.17649	10.7183	7.76753	1.13264	0.576259	0.724701
rpmA	2315	B2HMG2	>sp|B2HMG2|RL27_MYCMM 50S ribosomal protein L27 OS=Mycobacterium marinum (strain ATCC BAA-535 / M) GN=rpmA PE=3 SV=1	14	14	70.5	9.2574	18.3676	15.0184	26.1188	25.8772	0.817657	0.575001	0.99075
MMAR_4220	3441	B2HS50	>tr|B2HS50|B2HS50_MYCMM Unidentified antibiotic-transport ATP-binding protein ABC transporter OS=Mycobacterium marinum (strain ATCC BAA-535 / M) GN=MMAR_4220 PE=3 SV=1	21	21	58.4	34	45.6105	42.9181	75.0806	64.9416	0.940968	0.571627	0.86496
MMAR_3452	1497	B2HIX0	>tr|B2HIX0|B2HIX0_MYCMM Uncharacterized protein OS=Mycobacterium marinum (strain ATCC BAA-535 / M) GN=MMAR_3452 PE=4 SV=1	18	17	56.8	39.837	7.90585	9.27646	16.2678	18.5657	1.17337	0.570234	1.14125
MMAR_5451	2621	B2HNQ3	>tr|B2HNQ3|B2HNQ3_MYCMM Conserved hypothetical alanine and proline rich membrane protein OS=Mycobacterium marinum (strain ATCC BAA-535 / M) GN=MMAR_5451 PE=4 SV=1	33	33	48.6	91.829	95.8308	78.4857	137.697	89.6449	0.819002	0.569989	0.651031
mmpL13_1	811	B2HGA2	>tr|B2HGA2|B2HGA2_MYCMM Conserved transmembrane transport protein MmpL13_1 OS=Mycobacterium marinum (strain ATCC BAA-535 / M) GN=mmpL13_1 PE=4 SV=1	13	13	22.4	81.254	3.98159	6.24683	10.9936	12.9168	1.56893	0.568224	1.17493
lprF	2551	B2HND9	>tr|B2HND9|B2HND9_MYCMM Conserved lipoprotein LprF OS=Mycobacterium marinum (strain ATCC BAA-535 / M) GN=lprF PE=4 SV=1	17	17	47.6	30.012	75.9458	97.2731	172.178	68.6902	1.28082	0.564957	0.398949
lpqV	3719	B2HT88	>tr|B2HT88|B2HT88_MYCMM Lipoprotein LpqV OS=Mycobacterium marinum (strain ATCC BAA-535 / M) GN=lpqV PE=4 SV=1	4	4	37.4	16.062	5.44172	4.13329	7.32521	5.12742	0.759556	0.564255	0.699968
MMAR_4474	188	B2HDJ6	>tr|B2HDJ6|B2HDJ6_MYCMM Conserved membrane protein OS=Mycobacterium marinum (strain ATCC BAA-535 / M) GN=MMAR_4474 PE=4 SV=1	8	8	33.1	31.049	19.3486	16.0517	28.6035	28.8969	0.829603	0.561179	1.01026
MMAR_0877	3333	B2HRM2	>tr|B2HRM2|B2HRM2_MYCMM Conserved hypothetical membrane protein OS=Mycobacterium marinum (strain ATCC BAA-535 / M) GN=MMAR_0877 PE=4 SV=1	4	4	30	5.5695	3.46812	4.10985	7.32521	10.3749	1.18503	0.561055	1.41633
MMAR_5269	2044	B2HLE1	>tr|B2HLE1|B2HLE1_MYCMM Conserved hypothetical transmembrane protein OS=Mycobacterium marinum (strain ATCC BAA-535 / M) GN=MMAR_5269 PE=4 SV=1	7	7	23.1	38.684	5.45319	8.21969	14.7032	5.17108	1.50732	0.559042	0.351698
yrbE1B	2399	B2HMT9	>tr|B2HMT9|B2HMT9_MYCMM Conserved hypothetical integral membrane protein YrbE1B OS=Mycobacterium marinum (strain ATCC BAA-535 / M) GN=yrbE1B PE=4 SV=1	6	6	15.2	30.411	8.45371	12.3999	22.2394	14.4266	1.4668	0.557563	0.648696
MMAR_1180	246	B2HDS2	>tr|B2HDS2|B2HDS2_MYCMM Fatty acyl-AMP ligase FadD28_1 and polyketide synthase OS=Mycobacterium marinum (strain ATCC BAA-535 / M) GN=MMAR_1180 PE=4 SV=1	41	41	16	340.77	21.8586	14.5134	26.0777	26.8001	0.663968	0.556546	1.0277
MMAR_1306	481	B2HEQ7	>tr|B2HEQ7|B2HEQ7_MYCMM Conserved transmembrane transport protein OS=Mycobacterium marinum (strain ATCC BAA-535 / M) GN=MMAR_1306 PE=4 SV=1	33	32	26.2	112.82	15.9149	21.2183	38.138	38.7176	1.33324	0.556356	1.0152
aroB_2	2925	B2HQ35	>tr|B2HQ35|B2HQ35_MYCMM 3-dehydroquinate synthase AroB_2 OS=Mycobacterium marinum (strain ATCC BAA-535 / M) GN=aroB_2 PE=4 SV=1	11	11	24.2	39.579	20.8317	8.10246	14.5977	8.24535	0.388949	0.555051	0.56484
MMAR_0464	2440	B2HMZ0	>tr|B2HMZ0|B2HMZ0_MYCMM Uncharacterized protein OS=Mycobacterium marinum (strain ATCC BAA-535 / M) GN=MMAR_0464 PE=4 SV=1	17	17	37.2	52.83	22.8626	16.5332	30.1038	26.8328	0.723154	0.549206	0.891345
MMAR_3520	1727	B2HJZ7	>tr|B2HJZ7|B2HJZ7_MYCMM Uncharacterized protein OS=Mycobacterium marinum (strain ATCC BAA-535 / M) GN=MMAR_3520 PE=4 SV=1	20	20	46.4	34.872	31.2361	18.506	33.7722	33.5793	0.592457	0.547967	0.994288
MMAR_0894	3347	B2HRN9	>tr|B2HRN9|B2HRN9_MYCMM Dehydrogenase OS=Mycobacterium marinum (strain ATCC BAA-535 / M) GN=MMAR_0894 PE=3 SV=1	16	16	47.8	31.892	24.7903	21.5826	39.48	27.3543	0.870603	0.546671	0.692866
MMAR_3060	717	B2HFT2	>tr|B2HFT2|B2HFT2_MYCMM Conserved hypothetical membrane protein OS=Mycobacterium marinum (strain ATCC BAA-535 / M) GN=MMAR_3060 PE=4 SV=1	8	8	34.9	29.901	7.46118	4.61478	8.45623	8.19077	0.618506	0.545726	0.968607
MMAR_0359	2138	B2HLS7	>tr|B2HLS7|B2HLS7_MYCMM Aldehyde dehydrogenase OS=Mycobacterium marinum (strain ATCC BAA-535 / M) GN=MMAR_0359 PE=3 SV=1	36	36	61.9	53.523	97.3368	90.0867	165.181	153.762	0.925515	0.545382	0.93087
lpqM	2904	B2HQ10	>tr|B2HQ10|B2HQ10_MYCMM Lipoprotein peptidase LpqM OS=Mycobacterium marinum (strain ATCC BAA-535 / M) GN=lpqM PE=4 SV=1	18	18	39.2	53.43	33.6887	30.0133	55.2087	34.0789	0.8909	0.543633	0.617275
MMAR_4495	205	B2HDL7	>tr|B2HDL7|B2HDL7_MYCMM Conserved hypothetical secreted protein OS=Mycobacterium marinum (strain ATCC BAA-535 / M) GN=MMAR_4495 PE=4 SV=1	8	8	34.2	23.214	5.95518	6.19994	11.4156	4.63869	1.0411	0.543109	0.406345
MMAR_2635	3593	B2HSQ7	>tr|B2HSQ7|B2HSQ7_MYCMM Uncharacterized protein OS=Mycobacterium marinum (strain ATCC BAA-535 / M) GN=MMAR_2635 PE=4 SV=1	13	13	49.4	28.524	27.7794	26.2677	48.5281	38.1197	0.945581	0.541288	0.785518
MMAR_2066	2229	B2HM52	>tr|B2HM52|B2HM52_MYCMM Uncharacterized protein OS=Mycobacterium marinum (strain ATCC BAA-535 / M) GN=MMAR_2066 PE=4 SV=1	13	13	44.9	18.905	14.3745	12.9048	23.8568	7.22423	0.897758	0.540928	0.302816
MMAR_4140	3257	B2HRB6	>tr|B2HRB6|B2HRB6_MYCMM Conserved hypothetical hydrolase OS=Mycobacterium marinum (strain ATCC BAA-535 / M) GN=MMAR_4140 PE=4 SV=1	13	13	33.2	45.047	8.94424	5.21351	9.64	4.63869	0.58289	0.540821	0.481192
cyp139A3	3210	B2HR39	>tr|B2HR39|B2HR39_MYCMM Cytochrome P450 139A3 Cyp139A3 OS=Mycobacterium marinum (strain ATCC BAA-535 / M) GN=cyp139A3 PE=3 SV=1	14	14	31.6	48.176	8.47664	5.21351	9.64	4.6496	0.615044	0.540821	0.482324
MMAR_0839	3309	B2HRI8	>tr|B2HRI8|B2HRI8_MYCMM Conserved membrane protein MmpS-family OS=Mycobacterium marinum (strain ATCC BAA-535 / M) GN=MMAR_0839 PE=4 SV=1	6	6	48.3	15.769	6.45718	6.72832	12.4412	10.364	1.04199	0.540812	0.833041
MMAR_5484	2639	B2HNT5	>tr|B2HNT5|B2HNT5_MYCMM Conserved protein OS=Mycobacterium marinum (strain ATCC BAA-535 / M) GN=MMAR_5484 PE=4 SV=1	14	14	56.6	19.792	19.3142	11.3431	21.0029	13.9488	0.587293	0.540074	0.664138
phoY1	282	B2HDX1	>tr|B2HDX1|B2HDX1_MYCMM Phosphate-transport system transcriptional regulatory protein PhoY1 OS=Mycobacterium marinum (strain ATCC BAA-535 / M) GN=phoY1 PE=4 SV=1	11	11	41.2	24.182	7.91731	7.25671	13.4667	7.72387	0.916562	0.538865	0.573555
MMAR_4499	207	B2HDM1	>tr|B2HDM1|B2HDM1_MYCMM Conserved hypothetical membrane protein OS=Mycobacterium marinum (strain ATCC BAA-535 / M) GN=MMAR_4499 PE=4 SV=1	5	5	16.7	29.211	5.46465	3.62835	6.73333	6.70275	0.663968	0.538865	0.995459
glgE	3037	B2HQI6	>tr|B2HQI6|B2HQI6_MYCMM Alpha-1,4-glucan:maltose-1-phosphate maltosyltransferase OS=Mycobacterium marinum (strain ATCC BAA-535 / M) GN=glgE PE=3 SV=1	25	25	39.6	77.523	26.7754	24.7763	46.0666	66.1047	0.925339	0.537836	1.43498
atsB	285	B2HDX4	>tr|B2HDX4|B2HDX4_MYCMM Arylsulfatase AtsB (Aryl-sulfate sulphohydrolase) OS=Mycobacterium marinum (strain ATCC BAA-535 / M) GN=atsB PE=4 SV=1	35	34	40	105.24	37.7276	40.2996	74.975	38.7067	1.06817	0.537507	0.516261
MMAR_2557	3397	B2HRX3	>tr|B2HRX3|B2HRX3_MYCMM Aldose 1-epimerase OS=Mycobacterium marinum (strain ATCC BAA-535 / M) GN=MMAR_2557 PE=4 SV=1	7	7	32.4	40.631	5.93225	6.65798	12.3884	12.3844	1.12234	0.537437	0.999676
plcB_5	2014	B2HL96	>tr|B2HL96|B2HL96_MYCMM Membrane-associated phospholipase C 2 PlcB_5 OS=Mycobacterium marinum (strain ATCC BAA-535 / M) GN=plcB_5 PE=4 SV=1	12	10	25.4	55.967	7.95171	7.25671	13.5194	8.76682	0.912597	0.536762	0.648461
ephF	2123	B2HLR0	>tr|B2HLR0|B2HLR0_MYCMM Epoxide hydrolase EphF OS=Mycobacterium marinum (strain ATCC BAA-535 / M) GN=ephF PE=4 SV=1	12	12	33.4	33.555	24.2769	17.9308	33.444	12.8731	0.738594	0.536142	0.384915
MMAR_3755	2307	B2HMF1	>tr|B2HMF1|B2HMF1_MYCMM Adenylate or guanylate cyclase OS=Mycobacterium marinum (strain ATCC BAA-535 / M) GN=MMAR_3755 PE=4 SV=1	29	29	42.2	80.226	42.2227	51.6662	96.4527	51.5689	1.22366	0.535663	0.534655
plcB	1761	B2HK41;B2HGF0	>tr|B2HK41|B2HK41_MYCMM Membrane-associated phospholipase C 2 PlcB OS=Mycobacterium marinum (strain ATCC BAA-535 / M) GN=plcB PE=4 SV=1	16	13	37.2	56.648	14.386	19.1048	35.7061	23.2153	1.32801	0.535056	0.650177
MMAR_2954	525	B2HEX5	>tr|B2HEX5|B2HEX5_MYCMM Dehydrogenase fad flavoprotein Gmc oxidoreductase OS=Mycobacterium marinum (strain ATCC BAA-535 / M) GN=MMAR_2954 PE=3 SV=1	20	20	43.5	61.185	9.92531	10.8851	20.411	21.1949	1.0967	0.533294	1.0384
MMAR_0032	1314	B2HI77	>tr|B2HI77|B2HI77_MYCMM Uncharacterized protein OS=Mycobacterium marinum (strain ATCC BAA-535 / M) GN=MMAR_0032 PE=4 SV=1	11	11	31.4	36.344	11.4313	8.12591	15.2423	14.959	0.710847	0.533115	0.981414
MMAR_4120	3241	B2HR96	>tr|B2HR96|B2HR96_MYCMM Adenylate cyclase OS=Mycobacterium marinum (strain ATCC BAA-535 / M) GN=MMAR_4120 PE=4 SV=1	14	12	25.4	56.938	6.97065	7.76165	14.5977	20.1192	1.11348	0.531704	1.37825
MMAR_1502	856	B2HGG7	>tr|B2HGG7|B2HGG7_MYCMM Uncharacterized protein OS=Mycobacterium marinum (strain ATCC BAA-535 / M) GN=MMAR_1502 PE=4 SV=1	7	7	28.2	31.199	5.46465	1.51481	2.85391	0.510558	0.277202	0.530785	0.178898
MMAR_5358	2338	B2HMJ3	>tr|B2HMJ3|B2HMJ3_MYCMM Conserved hypothetical membrane protein OS=Mycobacterium marinum (strain ATCC BAA-535 / M) GN=MMAR_5358 PE=4 SV=1	8	8	28.3	39.823	10.4044	5.62466	10.6127	10.8527	0.540605	0.529991	1.02261
amiC	1659	B2HJN4	>tr|B2HJN4|B2HJN4_MYCMM Amidase AmiC OS=Mycobacterium marinum (strain ATCC BAA-535 / M) GN=amiC PE=4 SV=1	21	21	41.9	50.961	21.3566	19.6097	37.1125	16.5016	0.918203	0.528386	0.444638
glgP	3036	B2HQI5	>tr|B2HQI5|B2HQI5_MYCMM Phosphorylase OS=Mycobacterium marinum (strain ATCC BAA-535 / M) GN=glgP PE=3 SV=1	28	28	31.3	95.741	14.865	18.6233	35.3896	40.2493	1.25282	0.526236	1.13732
MMAR_4866	996	B2HH15	>tr|B2HH15|B2HH15_MYCMM Conserved protein OS=Mycobacterium marinum (strain ATCC BAA-535 / M) GN=MMAR_4866 PE=4 SV=1	8	8	23.7	28.715	22.3606	14.3727	27.3142	23.248	0.642771	0.5262	0.851134
MMAR_1677	1353	B2HID3	>tr|B2HID3|B2HID3_MYCMM Uncharacterized protein OS=Mycobacterium marinum (strain ATCC BAA-535 / M) GN=MMAR_1677 PE=4 SV=1	13	13	54.9	22.764	24.3227	22.2047	42.2284	35.5669	0.912921	0.525825	0.842251
ppgK	2183	B2HLZ8	>tr|B2HLZ8|B2HLZ8_MYCMM Polyphosphate glucokinase PpgK OS=Mycobacterium marinum (strain ATCC BAA-535 / M) GN=ppgK PE=4 SV=1	7	7	30.3	27.516	7.41532	6.22339	11.8493	14.4048	0.839261	0.525212	1.21567
phoS2_1	286	B2HDX6	>tr|B2HDX6|B2HDX6_MYCMM Periplasmic phosphate-binding lipoprotein PhoS2_1 OS=Mycobacterium marinum (strain ATCC BAA-535 / M) GN=phoS2_1 PE=4 SV=1	10	10	41.4	38.445	7.92878	8.29003	15.8342	12.3953	1.04556	0.523552	0.782819
MMAR_0126	1606	B2HJC7	>tr|B2HJC7|B2HJC7_MYCMM Uncharacterized protein OS=Mycobacterium marinum (strain ATCC BAA-535 / M) GN=MMAR_0126 PE=4 SV=1	9	9	37.7	26.645	5.94372	4.13329	7.9171	9.77702	0.695405	0.522072	1.23492
MMAR_0420	2408	B2HMU8	>tr|B2HMU8|B2HMU8_MYCMM Conserved Mce associated protein OS=Mycobacterium marinum (strain ATCC BAA-535 / M) GN=MMAR_0420 PE=4 SV=1	11	11	49.2	20.331	17.375	14.9949	28.8145	12.895	0.863015	0.520395	0.447516
MMAR_4892	1018	B2HH41	>tr|B2HH41|B2HH41_MYCMM Uncharacterized protein OS=Mycobacterium marinum (strain ATCC BAA-535 / M) GN=MMAR_4892 PE=4 SV=1	12	12	47.5	35.864	24.7445	8.14935	15.6759	9.28829	0.32934	0.519864	0.592519
MMAR_4080	3044	B2HQJ5	>tr|B2HQJ5|B2HQJ5_MYCMM Adenylate cyclase OS=Mycobacterium marinum (strain ATCC BAA-535 / M) GN=MMAR_4080 PE=4 SV=1	15	7	29.9	58.416	23.8207	23.7899	45.7681	33.5465	0.998705	0.519792	0.732967
MMAR_2780	127	B2HD85	>tr|B2HD85|B2HD85_MYCMM Conserved hypothetical membrane protein OS=Mycobacterium marinum (strain ATCC BAA-535 / M) GN=MMAR_2780 PE=4 SV=1	4	4	22.9	25.781	7.92878	4.61478	8.88985	13.9161	0.58203	0.519107	1.56539
mmpL1_1	1390	B2HIH7	>tr|B2HIH7|B2HIH7_MYCMM Conserved transmembrane transport protein MmpL1_1 OS=Mycobacterium marinum (strain ATCC BAA-535 / M) GN=mmpL1_1 PE=4 SV=1	19	17	26.8	103.05	8.96717	9.87519	19.069	6.72459	1.10126	0.517867	0.352645
MMAR_0810	3136	B2HQV0	>tr|B2HQV0|B2HQV0_MYCMM Short-chain type oxidoreductase OS=Mycobacterium marinum (strain ATCC BAA-535 / M) GN=MMAR_0810 PE=3 SV=1	5	5	22	26.067	5.46465	2.61848	5.06319	2.57462	0.479166	0.51716	0.508499
coaA	3696	B2HT62	>sp|B2HT62|COAA_MYCMM Pantothenate kinase OS=Mycobacterium marinum (strain ATCC BAA-535 / M) GN=coaA PE=3 SV=1	8	8	35.3	35.598	9.92531	3.53457	6.83884	12.9059	0.356117	0.516837	1.88714
crtB	809	B2HG99	>tr|B2HG99|B2HG99_MYCMM Phytoene synthase, CrtB OS=Mycobacterium marinum (strain ATCC BAA-535 / M) GN=crtB PE=4 SV=1	13	13	42	35.586	15.3441	16.5332	31.9965	20.0755	1.07749	0.516718	0.627428
MMAR_3241	959	B2HGW5	>tr|B2HGW5|B2HGW5_MYCMM Conserved transmembrane protein OS=Mycobacterium marinum (strain ATCC BAA-535 / M) GN=MMAR_3241 PE=4 SV=1	8	8	26.9	22.307	11.8874	10.8147	20.9501	21.1621	0.909761	0.516212	1.01012
MMAR_3170	909	B2HGP8	>tr|B2HGP8|B2HGP8_MYCMM Methyltransferase OS=Mycobacterium marinum (strain ATCC BAA-535 / M) GN=MMAR_3170 PE=4 SV=1	15	13	43.2	30.921	32.263	25.2344	49.0145	32.5145	0.782146	0.514835	0.663365
galE6	2932	B2HQ42	>tr|B2HQ42|B2HQ42_MYCMM UDP-glucose 4-epimerase, GalE6 OS=Mycobacterium marinum (strain ATCC BAA-535 / M) GN=galE6 PE=4 SV=1	8	8	27.5	36.598	8.93278	2.54814	4.95768	1.04295	0.285257	0.513978	0.21037
MMAR_3870	2616	B2HNM8;B2HJG2	>tr|B2HNM8|B2HNM8_MYCMM Uncharacterized protein OS=Mycobacterium marinum (strain ATCC BAA-535 / M) GN=MMAR_3870 PE=4 SV=1	5	5	20.3	26.34	6.46865	6.75177	13.1385	5.16016	1.04377	0.51389	0.39275
lpqQ	658	B2HFH6	>tr|B2HFH6|B2HFH6_MYCMM Lipoprotein LpqQ OS=Mycobacterium marinum (strain ATCC BAA-535 / M) GN=lpqQ PE=4 SV=1	10	10	46.1	25.912	36.7122	34.5577	67.269	33.0032	0.941315	0.513724	0.490616
MMAR_2189	2552	B2HNE0	>tr|B2HNE0|B2HNE0_MYCMM Conserved membrane protein OS=Mycobacterium marinum (strain ATCC BAA-535 / M) GN=MMAR_2189 PE=4 SV=1	16	16	29.4	54.856	8.43078	8.38382	16.3733	1.03203	0.99443	0.512041	0.0630313
MMAR_2968	532	B2HEY8	>tr|B2HEY8|B2HEY8_MYCMM Uncharacterized protein OS=Mycobacterium marinum (strain ATCC BAA-535 / M) GN=MMAR_2968 PE=4 SV=1	11	11	59.8	26.512	6.46865	7.20982	14.1113	10.8527	1.11458	0.510925	0.76908
MMAR_3233	952	B2HGV6	>tr|B2HGV6|B2HGV6_MYCMM Conserved hypothetical secreted protein OS=Mycobacterium marinum (strain ATCC BAA-535 / M) GN=MMAR_3233 PE=4 SV=1	9	9	37.2	30.33	6.94771	4.59134	8.99536	6.17036	0.660841	0.510412	0.68595
pitA	3344	B2HRN6	>tr|B2HRN6|B2HRN6_MYCMM Low-affinity inorganic phosphate transporter, PitA OS=Mycobacterium marinum (strain ATCC BAA-535 / M) GN=pitA PE=4 SV=1	9	9	25.2	43.372	5.45319	9.80485	19.28	23.7477	1.798	0.50855	1.23173
MMAR_2632	3590	B2HSQ4	>tr|B2HSQ4|B2HSQ4_MYCMM Conserved membrane protein OS=Mycobacterium marinum (strain ATCC BAA-535 / M) GN=MMAR_2632 PE=4 SV=1	6	6	23.8	20.826	4.96265	5.695	11.2046	5.13833	1.14757	0.508272	0.45859
MMAR_2231	2734	B2HP76	>tr|B2HP76|B2HP76_MYCMM Uncharacterized protein OS=Mycobacterium marinum (strain ATCC BAA-535 / M) GN=MMAR_2231 PE=4 SV=1	22	22	38.9	50.509	23.3187	27.5355	54.3414	31.4934	1.18083	0.506712	0.579546
MMAR_1670	1120	B2HHI8	>tr|B2HHI8|B2HHI8_MYCMM Conserved membrane protein OS=Mycobacterium marinum (strain ATCC BAA-535 / M) GN=MMAR_1670 PE=4 SV=1	23	23	79	19.04	86.749	80.1646	159.801	65.7033	0.924099	0.501652	0.411157
cyp137A2	1789	B2HK84	>tr|B2HK84|B2HK84_MYCMM Cytochrome P450 137A2 Cyp137A2 OS=Mycobacterium marinum (strain ATCC BAA-535 / M) GN=cyp137A2 PE=3 SV=1	13	13	30	50.922	9.44624	6.19994	12.4412	12.884	0.656339	0.498341	1.0356
MMAR_2486	3214	B2HR50	>tr|B2HR50|B2HR50_MYCMM Antibiotic resistance ABC transporter, efflux system, ATP-binding protein OS=Mycobacterium marinum (strain ATCC BAA-535 / M) GN=MMAR_2486 PE=3 SV=1	11	11	41.7	27.553	8.44224	7.23326	14.5977	14.4594	0.856794	0.495508	0.990526
mce3A_1	3022	B2HQG6	>tr|B2HQG6|B2HQG6_MYCMM MCE-family protein Mce3A_1 OS=Mycobacterium marinum (strain ATCC BAA-535 / M) GN=mce3A_1 PE=4 SV=1	10	10	24.1	51.081	13.3934	12.353	24.9351	15.4914	0.922317	0.495406	0.62127
MMAR_2943	516	B2HEW4	>tr|B2HEW4|B2HEW4_MYCMM Conserved protein OS=Mycobacterium marinum (strain ATCC BAA-535 / M) GN=MMAR_2943 PE=4 SV=1	12	12	59.4	20.952	1.48306	3.62835	7.32521	12.3735	2.44653	0.495324	1.68916
MMAR_2938	363	B2HE97	>tr|B2HE97|B2HE97_MYCMM Nitroreductase OS=Mycobacterium marinum (strain ATCC BAA-535 / M) GN=MMAR_2938 PE=4 SV=1	7	7	23.4	23.301	5.47612	5.16662	10.56	7.19148	0.943482	0.489263	0.681012
nusG	3521	B2HSH0	>tr|B2HSH0|B2HSH0_MYCMM Transcription antitermination protein nusG OS=Mycobacterium marinum (strain ATCC BAA-535 / M) GN=nusG PE=3 SV=1	10	10	42.6	25.589	5.45319	3.55801	7.27246	6.69184	0.652465	0.489245	0.920161
MMAR_3542	1743	B2HK17	>tr|B2HK17|B2HK17_MYCMM Conserved hypothetical membrane protein OS=Mycobacterium marinum (strain ATCC BAA-535 / M) GN=MMAR_3542 PE=4 SV=1	7	7	22.3	40.31	6.92478	4.10985	8.45623	9.28829	0.593498	0.486014	1.0984
MMAR_0295	1894	B2HKQ7	>tr|B2HKQ7|B2HKQ7_MYCMM Short-chain type dehydrogenase/reductase OS=Mycobacterium marinum (strain ATCC BAA-535 / M) GN=MMAR_0295 PE=3 SV=1	16	16	45.2	31.73	11.8989	10.1691	21.0556	8.76682	0.854625	0.482963	0.416364
MMAR_2826	148	B2HDC9	>tr|B2HDC9|B2HDC9_MYCMM Conserved hypothetical membrane protein OS=Mycobacterium marinum (strain ATCC BAA-535 / M) GN=MMAR_2826 PE=4 SV=1	6	6	25.9	30.625	6.44572	3.55801	7.37797	2.57462	0.551997	0.482249	0.348961
fbpB	125	B2HD82	>tr|B2HD82|B2HD82_MYCMM Secreted antigen 85-B FbpB OS=Mycobacterium marinum (strain ATCC BAA-535 / M) GN=fbpB PE=4 SV=1	5	4	24	34.428	8.94424	10.3567	21.4893	18.5438	1.15792	0.481946	0.862935
MMAR_3398	1462	B2HIR7	>tr|B2HIR7|B2HIR7_MYCMM Transmembrane serine/threonine-protein kinase D OS=Mycobacterium marinum (strain ATCC BAA-535 / M) GN=MMAR_3398 PE=3 SV=1	21	21	41.5	66.256	20.8661	18.0011	37.429	18.6203	0.862697	0.48094	0.497482
MMAR_2568	3399	B2HRY4	>tr|B2HRY4|B2HRY4_MYCMM Phosphorylase OS=Mycobacterium marinum (strain ATCC BAA-535 / M) GN=MMAR_2568 PE=3 SV=1	50	50	46.8	94.246	57.5324	60.8488	126.949	167.047	1.05764	0.479317	1.31586
MMAR_3815	2578	B2HNH2	>tr|B2HNH2|B2HNH2_MYCMM Uncharacterized protein OS=Mycobacterium marinum (strain ATCC BAA-535 / M) GN=MMAR_3815 PE=4 SV=1	11	11	43	22.764	6.95918	5.695	11.902	10.3094	0.818344	0.47849	0.86619
MMAR_3526	1731	B2HK03	>tr|B2HK03|B2HK03_MYCMM Uncharacterized protein OS=Mycobacterium marinum (strain ATCC BAA-535 / M) GN=MMAR_3526 PE=4 SV=1	7	7	20.9	37.993	5.95518	4.0864	8.56174	3.60666	0.686192	0.477286	0.421253
MMAR_0573	2685	B2HNZ5	>tr|B2HNZ5|B2HNZ5_MYCMM Conserved hypothetical membrane protein OS=Mycobacterium marinum (strain ATCC BAA-535 / M) GN=MMAR_0573 PE=4 SV=1	13	13	38.6	38.892	13.3934	6.63454	14.1641	13.4273	0.495358	0.468407	0.947987
wcaA	2929	B2HQ39	>tr|B2HQ39|B2HQ39_MYCMM Glycosyltransferase, WcaA OS=Mycobacterium marinum (strain ATCC BAA-535 / M) GN=wcaA PE=4 SV=1	21	21	43.1	35.058	58.1032	46.7466	99.8458	49.0816	0.804544	0.468188	0.491574
MMAR_5011	1259	B2HI15	>tr|B2HI15|B2HI15_MYCMM Conserved hypothetical secreted protein OS=Mycobacterium marinum (strain ATCC BAA-535 / M) GN=MMAR_5011 PE=4 SV=1	6	6	30.6	32.963	14.8765	10.7913	23.0539	28.8969	0.725391	0.468089	1.25345
lpqN	3501	B2HSE9	>tr|B2HSE9|B2HSE9_MYCMM Conserved lipoprotein, LpqN OS=Mycobacterium marinum (strain ATCC BAA-535 / M) GN=lpqN PE=4 SV=1	3	3	21.5	23.472	14.9224	9.29991	19.9246	13.4383	0.62322	0.466754	0.674454
accD2	378	B2HEB4	>tr|B2HEB4|B2HEB4_MYCMM Acetyl-/propionyl-CoA carboxylase (Beta subunit) AccD2 OS=Mycobacterium marinum (strain ATCC BAA-535 / M) GN=accD2 PE=4 SV=1	11	11	22	56.292	10.4158	2.59503	5.60232	4.13905	0.249143	0.463207	0.73881
MMAR_0205	1849	B2HKG9	>tr|B2HKG9|B2HKG9_MYCMM Flavoprotein OS=Mycobacterium marinum (strain ATCC BAA-535 / M) GN=MMAR_0205 PE=4 SV=1	21	21	51.5	56.84	23.2958	26.7023	57.9571	26.8328	1.14623	0.460725	0.462978
MMAR_4826	823	B2HGB9	>tr|B2HGB9|B2HGB9_MYCMM Uncharacterized protein OS=Mycobacterium marinum (strain ATCC BAA-535 / M) GN=MMAR_4826 PE=4 SV=1	7	7	39.6	24.323	5.47612	3.62835	7.9171	3.60666	0.662578	0.458293	0.455553
sulP_2	447	B2HEL7	>tr|B2HEL7|B2HEL7_MYCMM Transmembrane carbonic anhydrase, SulP_2 OS=Mycobacterium marinum (strain ATCC BAA-535 / M) GN=sulP_2 PE=4 SV=1	10	10	16.2	79	15.8805	16.0517	35.3896	22.7047	1.01078	0.453571	0.641566
MMAR_0058	1330	B2HIA3	>tr|B2HIA3|B2HIA3_MYCMM Short-chain type oxidoreductase OS=Mycobacterium marinum (strain ATCC BAA-535 / M) GN=MMAR_0058 PE=3 SV=1	10	10	48	23.33	2.96613	3.07652	6.83884	11.8629	1.03722	0.44986	1.73464
MMAR_4514	219	B2HDN6	>tr|B2HDN6|B2HDN6_MYCMM Glycosyl transferase OS=Mycobacterium marinum (strain ATCC BAA-535 / M) GN=MMAR_4514 PE=4 SV=1	12	12	33.2	39.848	7.43825	6.10615	13.7304	6.20311	0.820913	0.444717	0.451778
MMAR_2630	3589	B2HSQ2	>tr|B2HSQ2|B2HSQ2_MYCMM Conserved hypothetical membrane protein OS=Mycobacterium marinum (strain ATCC BAA-535 / M) GN=MMAR_2630 PE=4 SV=1	6	6	24.6	30.831	7.43825	8.24314	18.6881	9.27738	1.10821	0.44109	0.496432
MMAR_0665	2855	B2HPU9	>tr|B2HPU9|B2HPU9_MYCMM Ethanolamine transporter OS=Mycobacterium marinum (strain ATCC BAA-535 / M) GN=MMAR_0665 PE=4 SV=1	6	6	15.5	49.895	5.45319	5.19006	11.7965	12.9059	0.951749	0.439966	1.09404
MMAR_1963	1948	B2HKZ2	>tr|B2HKZ2|B2HKZ2_MYCMM Conserved hypothetical hydrolase OS=Mycobacterium marinum (strain ATCC BAA-535 / M) GN=MMAR_1963 PE=4 SV=1	15	14	28	59.578	9.41184	6.70488	15.2423	8.7559	0.712387	0.439886	0.574447
MMAR_1339	497	B2HEU1	>tr|B2HEU1|B2HEU1_MYCMM Uncharacterized protein OS=Mycobacterium marinum (strain ATCC BAA-535 / M) GN=MMAR_1339 PE=4 SV=1	15	15	36.4	34.3	19.8735	9.13578	20.7919	19.0981	0.459696	0.439392	0.918535
MMAR_2710	3641	B2HSX9	>tr|B2HSX9|B2HSX9_MYCMM Haloalkane dehalogenase OS=Mycobacterium marinum (strain ATCC BAA-535 / M) GN=MMAR_2710 PE=4 SV=1	12	12	39.3	32.45	10.9064	8.70118	19.9774	17.0012	0.797807	0.435552	0.851025
mraZ	932	B2HGS6	>tr|B2HGS6|B2HGS6_MYCMM Protein MraZ OS=Mycobacterium marinum (strain ATCC BAA-535 / M) GN=mraZ PE=3 SV=1	7	7	37.7	16.662	9.41184	5.67155	13.033	8.27809	0.602598	0.435167	0.635162
MMAR_5351	2331	B2HMI6	>tr|B2HMI6|B2HMI6_MYCMM Conserved hypothetical membrane protein OS=Mycobacterium marinum (strain ATCC BAA-535 / M) GN=MMAR_5351 PE=4 SV=1	3	3	26	16.149	7.91731	8.31348	19.1217	15.4914	1.05004	0.434766	0.810147
[truncated: 57 more rows]

## Sheet: Genapol-enriched proteins
Genapol X-080 enriched proteins: proteins that are more than 4-fold enriched in the Genapol X-080 sample of WT cells as compared to WT cell envlope samples
[truncated: 115 more rows]

[truncated: 1 more sheets: ESX-5 for Genapol]
